# Supplementary material for: Integrative growth physiology and transcriptome profiling of probiotic Limosilactobacillus reuteri KUB-AC5
Source: PeerJ. 2021 Oct 5;9:e12226. doi: 10.7717/peerj.12226 (PMC8500091; doi:10.7717/peerj.12226)
Supplement: Supplemental Information 1 [file peerj-09-12226-s001.xlsx]

## Sheet: Table S1
	Table S1 Viable cell count of L. reuteri KUB-AC5 under different carbon sources.
	Viable cell count in sucrose Rep. 1															Viable cell count in sucrose Rep. 1						Average viable cell count in sucrose
	Time (h)	Dilutions (number of colonies)														Time (h)	Dilutions (number of colonies)		CFU/ml	log CFU/ml		Time (h)	Dilutions (number of colonies)		CFU/ml	log CFU/ml	S.D.
		10-3			10-4			10-5			10-6			10-7			10-4	10-5					10-4	10-5
		Rep. 1	Rep. 2	Average	Rep. 1	Rep. 2	Average	Rep. 1	Rep. 2	Average	Rep. 1	Rep. 2	Average	Rep. 1
	0	390	349	369.5	30	47	38.5	—	—	—	—	—	—	—		0	38.5	—	3850000	6.58546		0	37	—	3700000	6.5682	0.0249131
	3	347	368	357.5	26	41	33.5	—	—	—	—	—	—	—		3	33.5	—	3350000	6.52504		3	37	—	3700000	6.5682	0.0582728
	6	—	—	—	—	—	—	40	40	40	0	—	—	—		6	—	40	40000000	7.60206		6	—	44	44000000	7.64345	0.0559896
	9	—	—	—	—	—	—	121	132	126.5	16	—	—	—		9	—	126.5	126500000	8.10209		9	—	118.5	118500000	8.07372	0.0415271
	12	—	—	—	—	—	—	167	129	148	12	—	—	—		12	—	148	148000000	8.17026		12	—	137.25	137250000	8.13751	0.0482043
	15	—	—	—	—	—	—	228	229	228.5	100	—	—	—		15	—	228.5	228500000	8.35889		15	—	219.75	219750000	8.34193	0.0244685
	18	—	—	—	—	—	—	235	202	218.5	14	40	27	5		18	—	218.5	218500000	8.33945		18	—	204.5	204500000	8.31069	0.0421128
	21	—	—	—	—	—	—	168	191	179.5	23	12	17.5	1		21	—	179.5	179500000	8.25406		21	—	178.5	178500000	8.25164	0.00344085
	24	—	—	—	—	—	—	160	156	158	18	22	20	4		24	—	158	158000000	8.19866		24	—	182	182000000	8.26007	0.0814659
	Viable cell count in sucrose Rep. 2															Viable cell count in sucrose Rep. 2
	Time (h)	Dilutions (number of colonies)														Time (h)	Dilutions (number of colonies)		CFU/ml	log CFU/ml
		10-3			10-4			10-5			10-6			10-7			10-4	10-5
		Rep. 1	Rep. 2	Average	Rep. 1	Rep. 2	Average	Rep. 1	Rep. 2	Average	Rep. 1	Rep. 2	Average	Rep. 1
	0	318	313	315.5	29	42	35.5	—	—	—	—	—	—	—		0	35.5	—	3550000	6.55023
	3	367	366	366.5	35	46	40.5	—	—	—	—	—	—	—		3	40.5	—	4050000	6.60746
	6	—	—	—	—	—	—	49	47	48	1	—	—	—		6	—	48	48000000	7.68124
	9	—	—	—	—	—	—	100	121	110.5	8	—	—	—		9	—	110.5	110500000	8.04336
	12	—	—	—	—	—	—	142	111	126.5	14	—	—	—		12	—	126.5	126500000	8.10209
	15	—	—	—	—	—	—	209	213	211	24	—	—	—		15	—	211	211000000	8.32428
	18	—	—	—	—	—	—	200	181	190.5	20	11	15.5	2		18	—	190.5	190500000	8.27989
	21	—	—	—	—	—	—	185	170	177.5	20	19	19.5	4		21	—	177.5	177500000	8.2492
	24	—	—	—	—	—	—	249	163	206	15	77	46	7		24	—	206	206000000	8.31387
	Viable cell count in glucose Rep. 1															Viable cell count in glucose Rep. 1						Average viable cell count in glucose
	Time (h)	Dilutions (number of colonies)														Time (h)	Dilutions (number of colonies)		CFU/ml	log CFU/ml		Time (h)	Dilutions (number of colonies)		CFU/ml	log CFU/ml	S.D.
		10-3			10-4			10-5			10-6			10-7			10-4	10-5					10-4	10-5
		Rep. 1	Rep. 2	Average	Rep. 1	Rep. 2	Average	Rep. 1	Rep. 2	Average	Rep. 1	Rep. 2	Average	Rep. 1
	0	264	292	278	45	39	42	—	—	—	—	—	—	—		0	42	—	4200000	6.62325		0	40.5	—	4050000	6.60746	0.022758
	3	342	334	338	50	42	46	—	—	—	—	—	—	—		3	46	—	4600000	6.66276		3	47.5	—	4750000	6.67669	0.0194018
	6	—	—	—	320	363	341.5	31	27	29	—	—	—	—		6	—	29	29000000	7.4624		6	—	31.75	31750000	7.50174	0.0533308
	9	—	—	—	—	—	—	81	60	70.5	3	—	—	—		9	—	70.5	70500000	7.84819		9	—	71.75	71750000	7.85582	0.0107012
	12	—	—	—	—	—	—	78	89	83.5	18	—	—	—		12	—	83.5	83500000	7.92169		12	—	71.5	71500000	7.85431	0.104065
	15	—	—	—	—	—	—	130	138	134	12	—	—	—		15	—	134	134000000	8.1271		15	—	131	131000000	8.11727	0.0140678
	18	—	—	—	—	—	—	109	96	102.5	11	12	11.5	0		18	—	102.5	102500000	8.01072		18	—	109.75	109750000	8.0404	0.0406318
	21	—	—	—	—	—	—	142	120	131	9	37	23	1		21	—	131	131000000	8.11727		21	—	137.25	137250000	8.13751	0.0279877
	24	—	—	—	—	—	—	92	116	104	9	22	15.5	1		24	—	104	104000000	8.01703		24	—	118.5	118500000	8.07372	0.0755319
	Viable cell count in glucose Rep. 2															Viable cell count in glucose Rep. 2
	Time (h)	Dilutions (number of colonies)														Time (h)	Dilutions (number of colonies)		CFU/ml	log CFU/ml
		10-3			10-4			10-5			10-6			10-7			10-4	10-5
		Rep. 1	Rep. 2	Average	Rep. 1	Rep. 2	Average	Rep. 1	Rep. 2	Average	Rep. 1	Rep. 2	Average	Rep. 1
	0	317	320	318.5	37	41	39	—	—	—	—	—	—	—		0	39	—	3900000	6.59106
	3	319	314	316.5	42	56	49	—	—	—	—	—	—	—		3	49	—	4900000	6.6902
	6	—	—	—	331	358	344.5	35	34	34.5	—	—	—	—		6	—	34.5	34500000	7.53782
	9	—	—	—	—	—	—	73	73	73	10	—	—	—		9	—	73	73000000	7.86332
	12	—	—	—	—	—	—	55	64	59.5	10	—	—	—		12	—	59.5	59500000	7.77452
	15	—	—	—	—	—	—	132	124	128	7	—	—	—		15	—	128	128000000	8.10721
	18	—	—	—	—	—	—	122	112	117	14	8	11	0		18	—	117	117000000	8.06819
	21	—	—	—	—	—	—	138	149	143.5	31	22	26.5	2		21	—	143.5	143500000	8.15685
	24	—	—	—	—	—	—	138	128	133	10	21	15.5	1		24	—	133	133000000	8.12385

## Sheet: Table S2
	Table S2 Growth characteristics of L. reuteri KUB-AC5 under different carbon sources.
	Growth characteristics	Glucose	Sucrose	P-value*
	Maximum specific growth rate, µmax (h−1)	0.04 ± 0.001	0.05	0.008
	Biomass productivity (log CFU/ml/h)	0.28	0.36	0.009
	*P-value by Student's t-test analysis

## Sheet: Table S3
	Table S3 pH changes during L. reuteri KUB-AC5 cultures under different carbon sources.
	Time (h)	pH
		Glucose				Sucrose
		Rep. 1	Rep. 2	Average	S.D.	Rep. 1	Rep. 2	Average	S.D.
	0	6.61	6.56	6.585	0.0353553	6.58	6.59	6.585	0.00707107
	3	6.53	6.49	6.51	0.0282843	6.54	6.54	6.54	0
	6	6.04	6.04	6.04	0	6.05	6	6.025	0.0353553
	9	4.11	4.08	4.095	0.0212132	3.9	3.83	3.865	0.0494975
	12	3.56	3.55	3.555	0.00707107	3.54	3.5	3.52	0.0282843
	15	3.38	3.39	3.385	0.00707107	3.42	3.36	3.39	0.0424264
	18	3.3	3.33	3.315	0.0212132	3.33	3.32	3.325	0.00707107
	21	3.24	3.23	3.235	0.00707107	3.32	3.27	3.295	0.0353553
	24	3.15	3.19	3.17	0.0282843	3.29	3.24	3.265	0.0353553

## Sheet: Table S4
	Table S4 Cell-free supernatant (CFS) of L. reuteri KUB-AC5 on inhibition effects against Salmonella Enteritidis S003 growth.
	Time (h)	OD 600 nm
		L-phase								S-phase
		Glucrose				Sucrose				Glucrose				Sucrose
		Rep. 1	Rep. 2	Average	S.D.	Rep. 1	Rep. 2	Average	S.D.	Rep. 1	Rep. 2	Average	S.D.	Rep. 1	Rep. 2	Average	S.D.
	0	0.004	0.00166667	0.00283333	0.00164992	0.006	0.00333333	0.00466667	0.00188562	0.002	0.002	0.002	0	0.00433333	0.000333333	0.00233333	0.00282843
	5	0.00466667	0.00266667	0.00366667	0.00141421	0.007	0.004	0.0055	0.00212132	0.005	0.00333333	0.00416667	0.00117851	0.00533333	0.004	0.00466667	0.000942809
	7	0.00366667	0.00166667	0.00266667	0.00141421	0.00833333	0.004	0.00616667	0.00306413	0.00566667	0.00333333	0.0045	0.00164992	0.00533333	0.00233333	0.00383333	0.00212132
	10	0.046	0.0236667	0.0348333	0.0157921	0.00533333	0.005	0.00516667	0.000235702	0.00166667	0.000666667	0.00116667	0.000707107	0.00466667	0.00366667	0.00416667	0.000707107
	12	0.087	0.0653333	0.0761667	0.0153206	0.00366667	0.00966667	0.00666667	0.00424264	0.015	0.01	0.0125	0.00353553	0.00366667	0.00266667	0.00316667	0.000707107
	16	0.246333	0.151333	0.198833	0.0671751	0.001	0.008	0.0045	0.00494975	0.0386667	0.045	0.0418333	0.00447834	0.003	0.00233333	0.00266667	0.000471405
	18	0.332	0.296	0.314	0.0254558	0.00733333	0.003	0.00516667	0.00306413	0.0636667	0.0633333	0.0635	0.000235702	0.00366667	0.003	0.00333333	0.000471405
	24	0.252286	0.167333	0.20981	0.0600704	0.0683333	0.002	0.0351667	0.0469047	0.0856667	0.0636667	0.0746667	0.0155563	0.004	0.002	0.003	0.00141421
	P-value	0.489042								0.016844
	*P-value by Student's t-test analysis

## Sheet: Table S5
	Table S5 Overview of RNA-Seq data of L. reuteri KUB-AC5 under different carbon sources and growth phases.
	Summary	Glucose				Sucrose				Average
		L-phase		S-phase		L-phase		S-phase
		Rep. 1	Rep. 2	Rep. 1	Rep. 2	Rep. 1	Rep. 2	Rep. 1	Rep. 2
	Total raw reads (Mb)	27.0496	25.5761	22.9217	28.3561	25.0235	23.1733	26.4837	22.5114	25.1369
	Sequencing quality (%)	98.5	98.23	98.3	98.33	98.22	98.33	98.41	98.65	98.3713
	Error (%)	0.02	0.02	0.02	0.02	0.02	0.02	0.02	0.02	0.02
	GC-content (%)	40.89	40.67	41.59	41.21	40.62	40.96	40.74	40.86	40.9425

## Sheet: Table S6
	Table S6 Gene expression levels of L. reuteri KUB-AC5.
	Gene ID	FPKM value
		Glucose				Sucrose
		L-phase		S-phase		L-phase		S-phase
		Rep. 1	Rep. 2	Rep. 1	Rep. 2	Rep. 1	Rep. 2	Rep. 1	Rep. 2
	AC5u0009GL000001	10806.6	15143.3	7388.74	6935.7	11946.2	11268	10023.9	10056.9
	AC5u0009GL000002	108.492	111.121	78.219	78.921	143.212	144.069	119.967	120.627
	AC5u0009GL000003	109.106	102.359	77.9515	81.1955	152.207	143.849	129.986	131.309
	AC5u0009GL000004	103.845	87.711	87.4191	76.7449	132.245	126.44	130.581	142.419
	AC5u0009GL000005	3788.52	3871.48	4673	4408.78	4570.72	4832.67	5687.54	6746.78
	AC5u0009GL000006	7826.24	7716.56	7804.52	7313.28	9188.94	9651.25	9915.31	11082.9
	AC5u0009GL000007	503.031	482.248	297.225	297.573	466.543	495.025	394.211	387.145
	AC5u0009GL000008	512.424	457.273	285.416	284.547	494.196	514.756	378.857	373.739
	AC5u0009GL000009	392.149	324.492	255.312	244.285	370.523	376.305	310.823	319.016
	AC5u0009GL000010	268.374	215.886	199.298	194.477	263.829	261.855	257.895	248.908
	AC5u0009GL000011	231.499	178.007	215.634	202.186	220.952	211.81	247.999	234.82
	AC5u0009GL000012	1623.76	1969.44	1544.33	1368	1348.52	1169.62	1632.12	1380.25
	AC5u0009GL000013	216.329	227.752	171.484	163.776	266.297	271.692	235.965	252.588
	AC5u0009GL000014	141.602	140.678	121.976	117.254	177.296	192.132	176.469	170.685
	AC5u0009GL000015	515.166	488.346	519.453	521.295	702.863	706.756	728.793	729.061
	AC5u0009GL000016	351.587	366.523	374.552	374.589	499.267	558.705	552.965	529.244
	AC5u0009GL000017	2234.6	2991.37	2055.19	1911.67	2354.56	3483.99	3492.92	8017.84
	AC5u0009GL000018	135.237	147.444	107.401	101.119	139.555	142.947	135.959	130.359
	AC5u0009GL000019	1412.27	1368.22	1254.34	1256.75	1193.64	1262.86	1372.14	1447.18
	AC5u0009GL000020	374.424	362.287	314.061	304.314	382.27	362.453	352.252	349.942
	AC5u0009GL000021	199.256	201.959	179.161	175.582	215.729	217.765	219.679	202.179
	AC5u0009GL000022	219.258	211.817	216.247	212.681	231.797	230.196	242.782	228.783
	AC5u0009GL000023	154.738	152.414	123.941	140.031	153.678	160.711	155.011	159.794
	AC5u0009GL000024	176.123	161.487	129.958	125.026	159.303	167.375	152.678	153.946
	AC5u0009GL000025	94.9122	85.7732	96.2689	92.8843	90.5075	91.4954	106.744	99.5202
	AC5u0009GL000026	80.0192	73.6745	98.0746	89.8235	86.7187	92.2183	96.25	96.9779
	AC5u0009GL000027	745.474	851.401	788.209	771.765	1074.53	1176.39	1132.55	1273.78
	AC5u0009GL000028	694.421	809.554	732.462	701.109	1103.69	1068.46	1104.17	1040.77
	AC5u0009GL000029	166.454	277.073	207.128	243.368	103.422	115.737	136.974	161.467
	AC5u0009GL000030	83.2247	55.2586	83.2667	76.8619	82.5437	97.3828	104.225	106.486
	AC5u0009GL000031	136.098	95.3647	119.608	133.522	140.503	153.376	181.555	174.137
	AC5u0009GL000032	131.684	89.6683	121.11	123.697	141.39	152.91	160.32	167.864
	AC5u0009GL000033	123.564	85.8337	120.224	123.152	143.766	149.745	158.657	162.853
	AC5u0009GL000034	212.005	146.984	201.622	202.917	233.74	257.541	256.986	280.967
	AC5u0009GL000035	130.451	102.063	130.423	131.35	147.237	159.981	160.366	151.209
	AC5u0009GL000036	139.935	106.652	136.764	142.679	171.39	167.184	178.527	166.396
	AC5u0009GL000037	678.9	639.425	732.217	690.395	877.349	890.569	833.82	851.638
	AC5u0009GL000038	701.617	715.796	732.644	708.351	945.14	1009.47	900.429	913.47
	AC5u0009GL000039	97.8523	95.6438	141.658	149.729	84.9927	86.4344	133.291	102.838
	AC5u0009GL000040	101.777	93.3499	153.458	162.537	91.3173	90.946	134.888	119.698
	AC5u0009GL000041	92.471	95.8224	161.577	160.148	86.2034	87.056	148.671	117.401
	AC5u0009GL000042	6422.54	7054.29	5306.34	5227.09	7033.68	7295.95	6488.5	7529.91
	AC5u0009GL000043	8363.34	9064.41	7259.02	6935.23	10058.3	9328.91	8503.58	8339.15
	AC5u0009GL000044	12362.2	13632	10693.3	10207.1	14050.3	14403.1	12656	13507.7
	AC5u0009GL000045	451.397	896.612	760.919	830.987	149.515	148.695	365.17	327.804
	AC5u0009GL000046	206.292	312.767	115.83	116.126	512.839	416.257	259.609	396.233
	AC5u0009GL000047	478.145	530.842	818.118	775.574	425.453	408.351	632.228	645.849
	AC5u0009GL000048	454.859	458.819	748.38	717.645	447.197	433.46	599.812	565.55
	AC5u0009GL000049	379.754	382.389	671.473	651.058	386.949	388.377	517.839	508.588
	AC5u0009GL000050	113.535	165.906	160.518	156.151	131.89	124.349	184.449	164.05
	AC5u0009GL000051	113.729	150.881	175.272	165.339	113.724	128.512	178.407	149.083
	AC5u0009GL000052	142.248	125.402	354.255	333.732	384.737	533.362	720.69	1932.76
	AC5u0009GL000053	23.7509	22.6775	34.3975	33.8404	15.953	23.6825	37.6834	40.2627
	AC5u0009GL000054	34.8507	27.8178	38.6975	44.5925	29.2566	31.6329	39.9131	33.4427
	AC5u0009GL000055	26.4087	25.8424	45.5695	45.1971	21.5653	21.6334	32.2159	33.1329
	AC5u0009GL000056	1665.04	1133.03	1839.94	1797.15	2030.99	1994.45	2530.19	2524.32
	AC5u0009GL000057	1402.1	1179.94	3194.23	3141.6	1997.91	2055.19	4990.9	4646.23
	AC5u0009GL000058	151.093	208.141	87.192	91.8564	148.711	137.236	116.494	97.6683
	AC5u0009GL000059	2021.7	2761.42	3502.99	3361.95	1290.1	1730.18	2728.71	4225.01
	AC5u0009GL000060	1501.8	1412.39	1462.65	1491.89	1441.52	1484.46	1278.84	1381.29
	AC5u0009GL000061	1531.25	1411.56	1444.84	1390.03	1545.67	1572.38	1336.11	1331.41
	AC5u0009GL000062	2122.08	2034.19	1796.62	1762.1	2222.23	2179.99	1788.87	1798.56
	AC5u0009GL000063	1503.74	1531.44	1643.77	1656.13	1619.53	1527.58	1506.72	1419.38
	AC5u0009GL000064	1046.47	1072.54	1304.55	1324.8	1078.86	1060.61	1181.02	1185.75
	AC5u0009GL000065	1451.29	1428.06	1721.82	1698.09	1436.57	1509.41	1529.37	1621.74
	AC5u0009GL000066	1369.96	1579.19	1581.94	1541.16	1565.33	2250.77	2095.99	4310.12
	AC5u0009GL000067	626.365	867.321	648.516	641.116	590.735	554.672	625.639	612.867
	AC5u0009GL000068	58.1415	72.9654	86.7975	88.3537	48.277	49.5281	60.0038	55.0132
	AC5u0009GL000069	527.015	599.862	349.945	348.353	64.8326	60.8324	65.9744	57.115
	AC5u0009GL000070	1016.96	692.141	1196.6	1111.65	1561.72	1529.98	1739.26	1801.57
	AC5u0009GL000071	886.612	587.586	894.948	902.503	1505.96	1453.34	1512.22	1495.18
	AC5u0009GL000072	145.633	90.7577	95.7095	94.3372	189.864	177.304	174.334	167.432
	AC5u0009GL000073	244.232	171.891	248.808	243.686	314.066	309.168	319.663	316.591
	AC5u0009GL000074	247.269	169.433	259.602	262.829	326.562	315.801	330.127	311.651
	AC5u0009GL000075	1290.32	1965.48	1341.46	1348.94	837.937	803.961	1058.28	1031.33
	AC5u0009GL000076	1142.7	1640.87	1256.77	1236.04	734.396	759.498	984.673	874.269
	AC5u0009GL000077	778.571	1217.37	619.089	638.243	411.369	450.714	487.311	453.617
	AC5u0009GL000078	14.2806	13.6382	20.3344	18.0285	14.2155	18.2443	20.2794	14.9857
	AC5u0009GL000079	196.756	234.632	195.135	208.132	268.946	276.149	311.185	312.51
	AC5u0009GL000080	36.1387	47.177	36.6267	34.3355	59.8228	55.4859	43.8021	44.4971
	AC5u0009GL000081	40.3259	42.5423	56.9416	55.3699	50.0344	58.7981	68.8564	61.195
	AC5u0009GL000082	62.5388	81.8841	91.7022	98.634	19.8713	19.4772	31.453	30.2193
	AC5u0009GL000083	309.087	282.276	400.955	387.852	432.399	407.285	434.533	412.936
	AC5u0009GL000084	360.537	307.722	490.539	466.336	514.311	512.86	520.873	494.91
	AC5u0009GL000085	3933.19	5424.56	3295.32	3162	4405.21	4597.77	4498.23	4762.34
	AC5u0009GL000086	383.132	448.422	270.814	281.473	442.517	455.356	398.247	388.548
	AC5u0009GL000087	355.651	384.649	269.194	292.051	414.469	395.509	374.009	351.042
	AC5u0009GL000088	366.543	392.942	305.159	322.174	414.94	438.742	413.6	440.81
	AC5u0009GL000089	319.836	346.524	273.259	291.005	378.668	397.576	354.328	371.106
	AC5u0009GL000090	384.946	428.456	309.897	322.732	460.407	482.251	454.164	462.735
	AC5u0009GL000091	507.973	534.068	394.226	422.499	654.613	637.654	585.711	547.991
	AC5u0009GL000092	299.654	322.449	280.299	277.763	403.557	416.186	416.436	418.314
	AC5u0009GL000093	254.284	271.039	226.873	219.79	397.452	400.983	367.638	363.654
	AC5u0009GL000094	10412	10871.2	9999.45	9978.63	6382.4	6146.55	6308.58	6167.12
	AC5u0009GL000095	16026.1	16953.9	15932.8	15866.6	9595.27	9253.86	10216.2	10506
	AC5u0009GL000664	0.31976	0.421669	0.101062	0.314342	1.00796	0.279871	0.160962	0.288045
	AC5u0009GL000665	0.505192	0.866057	0.15967	0.248316	1.26072	1.17912	0.508609	0.682628
	AC5u0009GL000674	29.7748	30.4119	25.627	24.397	44.3574	46.5016	40.8795	40.1992
	AC5u0009GL000675	753.869	782.298	540.746	561.2	492.813	512.071	526.193	549.053
	AC5u0009GL000676	127.698	125.141	57.258	58.1887	66.7897	69.1047	63.6591	59.3644
	AC5u0009GL000677	137.253	134.198	58.8842	73.9403	83.4187	73.9968	76.0521	71.5354
	AC5u0009GL000678	118.344	108.142	55.6101	58.394	64.9662	61.4768	64.4788	63.0189
	AC5u0009GL000679	786.249	934.431	345.808	360.415	284.542	275.842	245.976	248.816
	AC5u0009GL000680	692.651	908.604	294.97	302.258	250.66	247.411	210.82	203.752
	AC5u0009GL000681	425.078	316.684	449.977	443.314	680.561	669.244	606.578	580.549
	AC5u0009GL000682	574.015	482.035	575.204	571.169	725.822	709.213	696.296	673.812
	AC5u0009GL000683	602.566	499.688	512.552	468.491	759.62	748.886	638.229	630.329
	AC5u0009GL000684	221.516	216.802	257.817	248.667	202.88	205.683	233.305	226.992
	AC5u0009GL000685	6233.47	8476.85	5667.96	5510.53	6696.69	6824.25	6759.22	7111.65
	AC5u0009GL000686	21.3687	26.2919	34.1177	38.4727	28.6592	30.7654	36.5967	40.4307
	AC5u0009GL000687	4.80196	6.21414	7.44681	9.06352	8.61122	8.96623	10.8936	8.30531
	AC5u0009GL000688	3.12127	7.19355	4.00671	5.33426	3.07784	2.85799	5.22119	4.32568
	AC5u0009GL000689	2.06546	6.53696	6.47128	3.97265	3.39696	3.0392	7.41364	4.09873
	AC5u0009GL000690	8.62766	10.1057	16.6818	16.0898	15.5313	11.3271	20.5654	14.9343
	AC5u0009GL000691	10.171	8.49138	21.0916	16.6884	15.4541	12.5527	23.8683	13.8861
	AC5u0009GL000692	29.3988	32.1616	65.2069	81.5289	27.9205	28.3197	50.3511	42.6235
	AC5u0009GL000693	45.8211	48.5152	109.326	121.866	50.7725	38.1119	69.6159	65.642
	AC5u0009GL000694	59.6858	50.6801	137.11	112.34	50.0952	44.1705	72.9135	74.7478
	AC5u0009GL000695	55.1264	46.4034	114.373	108.385	31.8884	40.1239	65.1682	61.367
	AC5u0009GL000696	60.8027	64.8991	140.473	155.642	44.5965	63.1655	82.8189	75.607
	AC5u0009GL000697	80.6404	74.1816	182.964	190.142	58.9444	76.6044	89.226	77.4383
	AC5u0009GL000698	56.2789	45.728	140.518	144.576	46.1508	49.0901	76.7708	68.0574
	AC5u0009GL000699	56.922	45.4608	141.644	123.934	55.3879	56.3703	75.8712	71.4979
	AC5u0009GL000700	27.3827	27.7205	41.4017	37.523	29.8185	28.9215	29.0159	26.1783
	AC5u0009GL000701	50.8574	43.2397	130.565	136.501	1795.75	1803.3	1304.17	1373.19
	AC5u0009GL000702	52.0645	34.6506	149.255	146.449	2157.92	2288.56	1670.47	1821.92
	AC5u0009GL000703	86.803	83.5029	347.444	388.767	59.6716	76.232	141.305	134.475
	AC5u0009GL000704	96.8074	95.504	190.513	199.632	129.113	141.635	168.598	153.314
	AC5u0009GL000705	102.784	96.4935	188.745	199.179	131.518	131.043	167.142	155.491
	AC5u0009GL000706	85.6545	74.6743	120.131	113.294	131.564	123.213	118.572	116.096
	AC5u0009GL000707	1520.24	1277.81	2342.51	2346.73	1200.4	1211.63	1780.89	1861.82
	AC5u0009GL001024	196.68	307.646	352.984	349.509	172.414	192.013	251.897	241.168
	AC5u0009GL001025	10.4464	11.4902	30.5404	31.1583	10.4152	9.55885	16.4927	13.9729
	AC5u0009GL001026	193.652	114.387	209.947	212.36	476.982	547.477	260.074	322.514
	AC5u0009GL001027	124.037	77.3331	121.571	137.15	321.724	379.899	174.653	211.549
	AC5u0009GL001028	104.465	73.2424	114.701	124	296.48	358.041	170.115	196.931
	AC5u0009GL001029	779.172	1417.85	1124.86	1393.31	249.187	239.578	325.699	277.028
	AC5u0009GL001030	410.377	287.472	2024.67	1997.74	582.667	577.539	1190.25	1084.93
	AC5u0009GL001031	1454.85	1614.11	443.124	443.253	1072.01	997.292	553.866	550.8
	AC5u0009GL001032	62.2878	66.4005	205.676	230.317	24.7149	21.7307	37.6584	37.4066
	AC5u0009GL001033	45.4975	51.8041	41.7247	38.9797	17.8308	18.0884	15.5711	15.7681
	AC5u0009GL001034	55.4561	59.7381	48.4937	44.9794	24.1106	22.6832	21.4389	22.9739
	AC5u0009GL001035	72.1291	71.2989	222.038	227.613	46.1103	49.3301	120.094	99.2529
	AC5u0009GL001036	863.872	1306.19	2410.34	2436.01	180.432	165.203	589.995	582.064
	AC5u0009GL001037	48.3623	47.4967	72.0989	75.2489	40.5488	41.9748	44.9933	43.3335
	AC5u0009GL001038	47.0021	49.8811	72.8886	79.1833	41.4342	42.2019	53.9993	52.0765
	AC5u0009GL001039	276.593	317.556	396.333	380.59	290.629	279.623	369.64	347.115
	AC5u0009GL001040	284.001	414.505	576.966	542.84	237.174	240.071	381.396	441.665
	AC5u0009GL001041	95.316	153.478	154.869	139.218	82.9859	89.5568	113.023	115.379
	AC5u0009GL001042	40.7805	53.8423	43.106	44.0257	39.1928	45.2904	51.1343	51.6446
	AC5u0009GL001043	522.027	1048.09	189.373	185.502	237.318	261.922	222.435	205.932
	AC5u0009GL001044	176.645	134.803	85.8528	87.7745	357.11	350.086	214.968	229.711
	AC5u0009GL001045	28.3507	23.6678	21.0777	21.6014	52.4746	49.0453	42.4657	47.5248
	AC5u0009GL001046	390.058	405.749	347.336	348.739	480.014	480.794	407.147	426.423
	AC5u0009GL001047	363.152	208.722	468.575	460.42	594.618	592.211	599.784	584.624
	AC5u0009GL001048	15.9448	9.95535	23.2432	23.032	45.9877	41.2025	37.0193	23.8411
	AC5u0009GL001049	223.82	252.45	196.204	197.082	341.725	350.635	302.59	310.385
	AC5u0009GL001050	95.6027	71.8811	185.925	198.576	96.7075	101.053	122.398	121.773
	AC5u0009GL001051	504.211	395.496	647.308	640.616	361.996	394.404	456.727	452.174
	AC5u0009GL001052	895.177	798.568	2079.63	2136.59	591.937	614.068	1342.58	1361.07
	AC5u0009GL001053	11.933	11.8385	8.94172	8.62329	8.30368	8.53073	7.87654	7.1663
	AC5u0009GL001054	265.909	228.665	188.925	181.829	776.433	787.838	469.561	513.748
	AC5u0009GL001055	45.9852	42.9786	72.9497	75.946	41.9479	39.5927	55.6241	46.477
	AC5u0009GL001056	73.5541	54.1843	113.206	115.018	121.781	122.829	115.862	123.477
	AC5u0009GL001057	523.461	397.712	574.127	581.904	545.259	587.876	572.658	552.843
	AC5u0009GL001058	92.8561	83.9383	133.513	113	168.527	156.991	187.33	201.269
	AC5u0009GL001059	91.7258	78.581	136.618	133.676	172.89	168.974	181.455	177.85
	AC5u0009GL001060	45.6527	48.3187	62.9793	61.9828	48.7506	48.4176	65.1245	68.05
	AC5u0009GL001061	26.6116	29.29	21.5899	22.0408	27.1914	25.676	31.7491	27.6844
	AC5u0009GL001062	113.354	105.776	187.795	191.912	153.878	165.139	264.665	247.083
	AC5u0009GL001063	109.1	86.4292	152.344	165.051	131.293	138.552	212.674	205.933
	AC5u0009GL001064	89.7135	77.2575	139.418	142.927	126.416	123.595	183.093	187.537
	AC5u0009GL001065	67.3119	64.5338	104.903	113.67	87.3092	93.6878	147.031	144.533
	AC5u0009GL001322	543.912	413.447	751.6	716.665	381.418	382.636	482.115	499.965
	AC5u0009GL001323	50.2896	47.4931	64.1888	59.0396	55.1788	60.9453	59.1492	59.4149
	AC5u0009GL001324	122.189	123.24	115.599	121.798	201.731	211.329	167.078	162.98
	AC5u0009GL001325	81.679	90.2595	84.3663	82.0932	145.776	146.15	129.25	123.13
	AC5u0009GL001326	10.5225	11.7352	20.5245	17.4374	33.8014	22.1037	36.0187	59.2205
	AC5u0009GL001327	4.21921	6.42937	12.2979	11.1758	5.04906	4.37674	8.02353	9.29069
	AC5u0009GL001328	812.467	1712.92	900.722	949.483	515.307	533.723	760.809	730.984
	AC5u0009GL001329	514.124	1104.7	518.157	523.61	367.021	373.428	467.627	443.019
	AC5u0009GL001330	731.855	1466.5	724.45	724.826	532.624	533.505	641.252	560.207
	AC5u0009GL001331	233.661	329.305	180.438	165.705	227.406	214.02	221.076	214.734
	AC5u0009GL001332	295.63	364.203	204.409	201.118	287.983	290.904	284.695	280.074
	AC5u0009GL001333	386.201	433.318	249.211	254.651	376.418	366.293	329.769	316.801
	AC5u0009GL001334	329.712	379.451	237.045	246.73	320.397	323.567	310.851	304.185
	AC5u0009GL001335	353.413	417.895	247.801	251.633	349.73	349.987	342.471	302.454
	AC5u0009GL001336	928.186	950.594	915.075	892.658	1204.46	1147.61	1281.33	1199.37
	AC5u0009GL001337	1086.94	1091.22	1100.42	1083.7	1340.1	1340.38	1406.11	1365.22
	AC5u0009GL001338	396.184	384.896	395.587	390.155	468.351	473.03	477.094	460.437
	AC5u0009GL001339	247.503	264.628	297.024	266.124	322.531	314.622	344.239	319.039
	AC5u0009GL001340	577.466	595.673	600.522	599.801	628.901	632.756	651.148	636.022
	AC5u0009GL001341	597.57	617.657	652.943	639.619	611.69	582.786	674.436	622.855
	AC5u0009GL001342	753.33	486.846	933.665	921.391	1311.53	1328.05	1282.38	1252.57
	AC5u0009GL001343	338.921	325.371	460.806	484.96	342.783	393.531	558.071	543.145
	AC5u0009GL001344	339.953	283.945	467.597	449.235	356.178	363.045	503.05	449.299
	AC5u0009GL001345	317.139	259.797	358.617	346.062	304.83	333.605	377.191	338.064
	AC5u0009GL001346	248.818	217.265	272.31	262.502	230.202	277.393	311.705	313.941
	AC5u0009GL001347	233.703	213.313	249.542	238.429	244.468	272.019	310.867	318.665
	AC5u0009GL001348	281.243	256.289	332.347	328.332	312.49	336.353	372.969	377.193
	AC5u0009GL001349	795.789	806.025	875.162	848.662	701.776	726.222	839.626	843.934
	AC5u0009GL001350	458.904	499.249	656.162	648.166	463.082	477.986	591.195	557.631
	AC5u0009GL001351	530.803	577.958	737.694	715.66	541.551	532.028	623.917	624.428
	AC5u0009GL001352	123.111	124.843	145.84	140.018	152.422	163.405	158.448	153.075
	AC5u0009GL001353	469.229	392.441	420.096	425.804	603.613	616.319	551.443	536.855
	AC5u0009GL001354	134.06	99.1926	460.197	479.019	264.097	276.257	414.225	413.42
	AC5u0009GL001355	135.915	86.9587	451.8	463.08	266.345	274.865	410.841	389.745
	AC5u0009GL001356	84.1668	87.1423	104.586	106.24	158.892	156.755	161.219	146.639
	AC5u0009GL001357	91.5557	91.1704	106.821	112.032	156.351	178.008	181.53	174.937
	AC5u0009GL001358	80.0606	83.891	98.392	100.336	154.283	164.923	156.599	147.203
	AC5u0009GL001359	102.24	88.6752	102.689	112.073	177.302	185.653	174.085	179.966
	AC5u0009GL001360	84.6267	77.7184	114.115	117.076	162.026	161.392	159.046	150.773
	AC5u0009GL001361	88.7897	83.1799	110.436	117.367	161.832	170.667	175.256	159.504
	AC5u0009GL001362	124.775	121.676	158.913	161.78	231.572	236.604	242.667	238.749
	AC5u0009GL001363	20.6857	22.1532	34.1752	32.8135	22.4764	19.0653	33.6838	30.3509
	AC5u0009GL001364	43.0575	52.6851	44.1142	42.6426	13.926	14.5328	21.9161	21.4554
	AC5u0009GL001365	64.6823	82.7131	62.1495	61.285	20.9268	21.8552	38.6151	32.8752
	AC5u0009GL001366	145.507	158.617	151.975	130.143	123.331	124.01	148.99	106.62
	AC5u0009GL001367	69.9863	87.8331	81.4145	68.663	62.9696	59.6662	73.4131	62.0801
	AC5u0009GL001368	279.419	303.026	275.37	283.181	188.649	179.613	205.173	196.987
	AC5u0009GL001369	363.661	406.252	414.44	393.689	247.034	272.548	409.851	533.178
	AC5u0009GL001370	433.314	656.953	306.52	292.384	399.936	418.496	380.023	394.082
	AC5u0009GL001371	867.371	1255.54	1059.37	980.009	708.561	947.213	1360.55	2501.19
	AC5u0009GL001372	228.366	263.737	236.592	221.272	181.736	155.599	201.172	183.249
	AC5u0009GL001373	397.657	378.085	371.835	358.712	400.974	447.928	394.093	438.005
	AC5u0009GL001374	1090.37	961.262	423.497	421.417	58.4408	52.9664	52.4855	48.8415
	AC5u0009GL001375	1235.5	1043.75	489.868	484.467	61.4243	59.3586	64.6616	50.9528
	AC5u0009GL001376	1208.12	1033.05	491.511	469.847	55.448	49.9772	59.7289	55.095
	AC5u0009GL001377	1237.05	1099.96	544.018	541.669	57.3931	52.3168	58.8517	59.4632
	AC5u0009GL001378	351.527	299.983	558.055	561.846	362.989	331.677	509.333	487.81
	AC5u0009GL001379	331.107	292.53	543.896	532.692	380.859	394.097	509.113	511.066
	AC5u0009GL001380	1755.17	1533.13	1876.71	1837.68	3443.03	3394.96	2872.14	2847.36
	AC5u0009GL001381	99.4174	101.985	145.098	142.884	99.868	102.017	130.223	139.847
	AC5u0009GL001382	190.741	175.835	236.826	241.184	197.967	209.6	236.152	217.448
	AC5u0009GL001383	166.471	146.751	199.483	194.6	164.252	168.346	197.072	184.661
	AC5u0009GL001384	183.759	170.633	225.883	219.79	190.913	205.265	240.775	218.611
	AC5u0009GL001385	176.035	161.636	196.757	190.136	175.14	186.66	203.733	195.938
	AC5u0009GL001386	41.4172	44.8275	21.198	20.4281	15.8114	14.7176	16.5924	16.6967
	AC5u0009GL001387	59.1601	52.8653	55.5813	67.3889	48.0793	50.709	70.3894	66.9552
	AC5u0009GL001388	49.7788	50.5045	49.5954	47.4869	45.8029	44.4287	53.0228	49.9498
	AC5u0009GL001389	208.007	208.116	199.692	194.602	236.009	245.466	234.387	237.088
	AC5u0009GL001390	26.9763	43.9493	24.6068	28.3655	32.1127	37.4589	44.8636	47.166
	AC5u0009GL001541	15.0338	16.0141	24.0345	20.7337	23.235	18.2684	22.9236	23.9298
	AC5u0009GL001542	42.3431	35.3586	43.3496	47.1836	44.9192	39.2088	47.8712	42.8945
	AC5u0009GL001543	235.863	169.413	381.216	393.437	276.867	277.943	349.772	330.519
	AC5u0009GL001544	2930.59	7729.99	1076.79	1030.93	268.512	220.362	234.399	227.894
	AC5u0009GL001545	4235.97	10949.1	1571.9	1496.97	349.209	284.201	331.328	307.297
	AC5u0009GL001546	3566.64	9312.58	1356.22	1341.79	282.682	251.293	293.148	286.923
	AC5u0009GL001547	529.549	608.259	509.892	496.351	274.248	279.844	412.464	387.38
	AC5u0009GL001548	679.726	776.174	597.946	571.681	348.512	356.677	476.173	409.175
	AC5u0009GL001549	418.577	498.58	355.038	401.151	189.877	222.291	279.577	273.522
	AC5u0009GL001550	5942.44	5869.94	8176.34	7922.62	3133.41	3509.02	5317.83	5382.95
	AC5u0009GL001551	2037.03	1846.49	1893.97	1866.39	1859.88	1850.42	1856.33	1969.16
	AC5u0009GL001552	171.275	120.646	183.692	190.508	292.119	288.85	265.076	263.64
	AC5u0009GL001553	131.095	93.0228	152.696	151.318	232.786	237.965	222.957	227.578
	AC5u0009GL001554	111.761	91.8269	138.373	136.214	197.344	202.467	196.22	205.658
	AC5u0009GL001555	92.9878	109.423	81.4246	76.8457	139.294	140.257	101.44	125.529
	AC5u0009GL001556	52.0085	38.89	57.8972	53.0439	109.486	126.574	160.048	155.214
	AC5u0009GL001557	173.604	120.618	228.205	229.197	186.566	197.118	198.528	202.311
	AC5u0009GL001558	15.4873	11.342	11.7956	11.2673	14.5314	13.4862	15.1629	13.9939
	AC5u0009GL001559	126.565	128.128	180.144	193.667	146.728	154.421	180.568	170.954
	AC5u0009GL001560	138.344	130.756	213.711	229.344	165.988	155.347	210.092	206.006
	AC5u0009GL001561	128.935	125.472	233.207	250.781	177.284	170.082	237.337	199.327
	AC5u0009GL001562	54.2177	56.6169	72.1968	69.5321	70.5606	86.3167	96.9081	93.0525
	AC5u0009GL001563	30.7474	34.7982	31.8556	28.2025	45.6635	52.3349	49.2042	43.2199
	AC5u0009GL001564	370.841	357.059	516.986	482.076	425.29	427.603	567.085	560.505
	AC5u0009GL001565	232.402	545.249	232.087	233.143	244.534	257.477	304.95	307.644
	AC5u0009GL001566	155.35	169.169	147.057	146.045	187.304	199.215	190.654	185.57
	AC5u0009GL001567	116.97	87.6747	122.713	117.783	147.533	151.839	139.449	144.321
	AC5u0009GL001568	91.5752	74.5519	89.3678	83.5138	121.179	126.985	108.784	109.547
	AC5u0009GL001569	74.5225	58.9006	76.9894	73.7645	97.3318	105.704	94.7396	95.6755
	AC5u0009GL001570	471.551	512.093	490.582	514.526	272.619	275.476	328.679	315.248
	AC5u0009GL001571	26004.5	24122.4	30460.6	30509.6	22170.2	24872.5	28081.8	31256
	AC5u0009GL001572	1149.24	1655.92	653.72	663.486	989.489	957.117	934.905	875.24
	AC5u0009GL001573	9724.09	10802.2	7036.63	6796.66	8704.33	8564.81	9704.79	9728.53
	AC5u0009GL001574	610.271	683.018	582.588	584.118	631.061	655.878	627.586	605.08
	AC5u0009GL001575	473.059	526.584	539.114	518.653	506.503	479.518	497.215	514.159
	AC5u0009GL001576	19.2462	19.6657	28.3748	28.89	17.2561	20.7456	26.7441	25.7465
	AC5u0009GL001577	28.3467	21.0741	41.7158	38.6392	23.1568	22.9819	34.238	34.0955
	AC5u0009GL001578	353.632	521.439	312.931	344.644	177.907	187.105	305.287	275.999
	AC5u0009GL001579	195.872	162.135	185.153	173.61	192.496	203.192	241.937	219.483
	AC5u0009GL001580	151.989	132.535	153.806	143.827	148.623	162.431	184.999	183.621
	AC5u0009GL001581	154.307	135.853	153.521	159.64	171.024	170.517	198.245	186.742
	AC5u0009GL001582	185.364	158.158	219.943	203.472	199.288	196.247	241.257	234.922
	AC5u0009GL001583	204.66	170.23	225.119	234.085	212.364	217.5	270.567	269.226
	AC5u0009GL001584	278.427	212.593	291.992	304.506	318.505	297.313	345.569	322.325
	AC5u0009GL001585	5364.96	4389.91	6933.14	6791.53	5957.28	6070.42	7399.93	7737.43
	AC5u0009GL001586	51.2043	53.4695	56.0704	56.0013	45.1308	47.1595	54.1207	47.4802
	AC5u0009GL001587	149.565	154.543	235.492	208.125	201.825	345.499	431.447	1009.15
	AC5u0009GL001588	160.852	131.099	230.204	242.287	155.832	165.619	230.296	210.124
	AC5u0009GL001589	135.329	98.2552	166.637	173.08	124.97	129.642	175.331	158.073
	AC5u0009GL001590	134.709	92.2999	172.351	163.598	134.005	140.188	181.409	173.056
	AC5u0009GL001591	503.013	380.478	1056.77	1043.36	430.462	448.833	838.034	788.563
	AC5u0009GL001592	740.085	1017.18	691.322	704.778	735.268	747.529	785.399	784.1
	AC5u0009GL001593	425.45	636.366	497.192	489.474	457.133	453.948	561.046	521.926
	AC5u0009GL001594	324.397	198.479	447.404	434.793	431.092	433.263	481.637	463.033
	AC5u0009GL001595	277.349	157.028	339.207	329.964	338.993	382.141	382.401	389.264
	AC5u0009GL001596	295.859	290.737	291.019	311.29	224.904	229.152	264.753	283.332
	AC5u0009GL001597	325.592	300.877	340.761	341.367	266.378	247.325	327.932	303.226
	AC5u0009GL001598	244.009	252.004	289.94	282.514	200.248	188.535	270.553	253.564
	AC5u0009GL001599	263.109	249.484	337.11	319.744	206.619	221.208	299.348	304.39
	AC5u0009GL001600	234.408	224.63	283.724	288.196	200.646	195.867	269.854	250.093
	AC5u0009GL001601	30.6898	24.6314	62.9201	61.8921	55.7487	56.537	65.8772	68.1343
	AC5u0009GL001602	29.2308	24.2057	64.3722	63.2644	54.8231	58.2295	79.9	79.278
	AC5u0009GL001603	38.7956	37.5757	1479.43	1630.96	208.941	196.99	333.273	319.6
	AC5u0009GL001604	22.8721	21.2884	869.904	973.958	119.71	121.005	195.929	206.115
	AC5u0009GL001605	200.063	168.766	707.88	758.249	153.739	170.452	416.756	383.777
	AC5u0009GL001727	465.25	439.662	499.719	510.441	272.361	285.517	363.919	351.886
	AC5u0009GL001728	403.287	703.343	78.6185	72.1736	245.864	236.022	139.232	133.108
	AC5u0009GL001729	1685.99	2167.05	1934.08	1864.75	1443.53	1594.92	1999.88	1885.71
	AC5u0009GL001730	47.209	45.8316	53.916	57.1571	44.5834	51.3751	66.9916	55.7456
	AC5u0009GL001731	303.375	270.586	338.504	340.545	290.062	276.886	331.983	306.851
	AC5u0009GL001732	342.865	298.152	329.112	329.294	328.718	304.914	310.644	307.704
	AC5u0009GL001733	133.328	165.397	155.77	148.184	232.926	245.849	193.663	202.015
	AC5u0009GL001734	147.418	196.868	159.661	154.003	263.421	282.745	230.769	220.038
	AC5u0009GL001735	546.47	850.168	643.162	645.186	588.145	582.691	612.459	640.229
	AC5u0009GL001736	182.146	220.557	242.705	244.957	117.788	123.756	194.458	180.334
	AC5u0009GL001737	352.656	455.514	353.715	339.28	257.381	247.962	314.329	297.94
	AC5u0009GL001738	226.524	279.772	274.722	254.282	202.678	199.15	245.632	234.958
	AC5u0009GL001739	282.514	345.342	337.447	322.815	253.566	245.78	301.274	281.409
	AC5u0009GL001740	313.009	372.644	325.93	330.611	278.929	269.187	294.86	277.764
	AC5u0009GL001741	487.346	544.832	1006.02	971.687	415.795	406.451	646.702	627.535
	AC5u0009GL001742	39.1611	47.0916	39.8146	38.2283	58.6293	56.0878	52.0396	46.1315
	AC5u0009GL001743	113.392	178.375	104.233	93.7605	175.825	171.224	148.674	158.024
	AC5u0009GL001744	110.088	68.3719	92.0175	86.0227	13.1778	11.1206	16.7841	12.7424
	AC5u0009GL001745	7.15887	6.30791	11.8273	12.0358	6.23997	9.39872	12.7356	10.2106
	AC5u0009GL001746	109.551	76.6832	131.039	124.585	200.167	220.881	262.64	281.53
	AC5u0009GL001747	66.3699	60.2478	56.198	56.9302	80.3121	77.67	79.9961	79.1229
	AC5u0009GL001748	69.6801	62.9884	80.8626	66.996	85.5119	79.9977	89.5635	84.8899
	AC5u0009GL001749	76.0102	74.842	88.0864	78.0431	86.1903	86.3633	101.82	99.9173
	AC5u0009GL001750	81.5422	65.3761	82.3978	85.6173	108.91	103.76	106.76	96.5025
	AC5u0009GL001751	96.1099	82.1952	98.8449	93.7955	114.786	121.256	114.683	116.165
	AC5u0009GL001752	160.189	141.967	183.935	187.224	235.506	244.649	244.092	246.83
	AC5u0009GL001753	840.456	824.966	1902.86	1652.77	1251.91	1397.98	2859.36	4657.7
	AC5u0009GL001754	114.735	210.2	122.387	101.209	76.4246	67.2467	90.2428	83.0531
	AC5u0009GL001755	233.351	327.276	257.989	238.332	160.255	162.604	211.855	201.823
	AC5u0009GL001756	513.652	409.741	595.45	585.329	258.043	231.981	373.816	338.588
	AC5u0009GL001757	496.745	373.155	514.119	522.744	187.861	205.739	316.846	284.176
	AC5u0009GL001758	429.69	311.568	403.653	419.371	172.182	174.75	235.005	221.663
	AC5u0009GL001759	476.583	336.511	472.631	497.993	200.043	201.426	262.551	255.847
	AC5u0009GL001760	470.375	306.137	478.159	487.652	193.835	190.193	258.337	236.168
	AC5u0009GL001761	494.007	327.115	534.923	544.538	206.076	200.426	291.707	258.16
	AC5u0009GL001762	589.019	388.119	630.847	633.671	270.533	265.307	354.705	335.238
	AC5u0009GL001763	168.561	154.355	290.13	273.876	70.3406	72.0417	124.905	113.867
	AC5u0009GL001764	130.569	130.539	175.496	178.438	59.5045	62.8068	88.0892	87.7311
	AC5u0009GL001765	109.281	110.424	173.81	155.413	46.7285	51.5822	79.444	89.5671
	AC5u0009GL001766	145.094	108.007	184.613	195.554	95.3127	96.4267	140.201	123.598
	AC5u0009GL001767	153.388	131.361	221.547	226.356	116.411	115.389	172.668	153.072
	AC5u0009GL001768	97.9776	105.046	135.97	136.162	78.5815	77.9648	103.032	108.097
	AC5u0009GL001769	388.742	251.141	313.525	299.167	236.136	259.488	207.47	208.844
	AC5u0009GL001770	52.5675	50.2012	46.5765	49.5204	49.61	45.8579	59.8846	56.1278
	AC5u0009GL001771	25.1117	21.5007	11.5025	20.3929	15.6787	14.0156	19.0528	10.0538
	AC5u0009GL001772	56.73	50.9437	67.3037	67.3457	56.8973	57.9348	72.9747	70.4667
	AC5u0009GL001773	86.0637	76.988	99.4843	106.403	76.4402	81.0295	111.731	116.549
	AC5u0009GL001774	130.794	104.703	121.93	115.427	114.827	118.987	152.609	140.05
	AC5u0009GL001775	117.376	89.2047	87.8184	91.1298	85.2708	89.8307	122.87	109.951
	AC5u0009GL001776	87.9317	67.7951	62.3676	66.1502	67.5242	68.2504	106.744	103.713
	AC5u0009GL001777	74.0453	48.9355	55.2251	56.2298	51.3746	57.5617	86.4972	84.7942
	AC5u0009GL001778	122.535	108.89	282.35	300.65	58.91	56.0005	138.525	144.328
	AC5u0009GL001779	123.375	91.3778	233.731	235.413	86.0414	76.8736	172.941	155.615
	AC5u0009GL001780	62.5809	59.6712	68.5245	68.408	44.8245	48.9727	59.8181	61.411
	AC5u0009GL001874	59.101	42.7716	58.6281	62.1664	27.3655	28.9678	47.0453	43.6798
	AC5u0009GL001875	70.782	43.0305	62.4843	69.3531	32.9257	35.4109	50.9341	46.4677
	AC5u0009GL001876	69.5694	46.5835	83.7803	76.7408	33.7837	38.0132	58.6611	61.3834
	AC5u0009GL001877	61.8522	40.2079	67.1131	63.6409	29.9782	32.5961	49.2245	52.7093
	AC5u0009GL001878	65.3573	43.1027	64.5215	73.7734	28.8416	33.1796	48.5544	47.9769
	AC5u0009GL001879	318.875	209.108	230.498	245.682	139.515	137.553	162.096	158.791
	AC5u0009GL001880	264.428	173.636	225.077	228.057	124.28	115.216	140.005	146.471
	AC5u0009GL001881	176.531	121.915	152.669	160.922	81.49	89.926	113.979	106.015
	AC5u0009GL001882	107.425	68.7999	96.9481	100.837	41.5282	46.5054	64.106	61.2074
	AC5u0009GL001883	104.559	63.0053	97.1075	102.354	46.4636	41.633	62.876	56.0741
	AC5u0009GL001884	97.1407	64.6284	93.563	96.6684	40.2678	37.3665	61.9274	53.6343
	AC5u0009GL001885	147.311	102.723	125.106	139.88	50.3756	50.2109	82.5593	73.6404
	AC5u0009GL001886	99.8671	68.4297	106.605	107.74	34.3996	30.6359	55.9391	51.8898
	AC5u0009GL001887	149.961	104.031	136.526	149.548	39.8035	42.383	74.7009	65.287
	AC5u0009GL001888	134.17	84.8322	107.793	118.794	33.7504	32.3435	59.9595	56.0609
	AC5u0009GL001889	208.394	129.179	148.95	154.566	39.5405	39.7593	82.822	68.8664
	AC5u0009GL001890	196.552	118.295	127.045	141.359	39.6669	38.3228	66.2829	61.3759
	AC5u0009GL001891	153.078	95.0372	106.82	114.902	30.2816	28.1829	53.2075	49.5104
	AC5u0009GL001892	160.052	97.8608	121.557	130.472	26.3634	29.0889	54.2068	50.4884
	AC5u0009GL001893	203.33	125.761	141.243	169.492	31.1045	32.7453	58.4543	63.3537
	AC5u0009GL001894	230.625	134.167	166.593	179.597	38.8468	40.7148	76.973	68.1885
	AC5u0009GL001895	248.988	150.148	185.026	208.639	39.7612	36.5356	78.5508	73.5053
	AC5u0009GL001896	168.422	104.494	148.943	160.865	27.649	27.9165	61.7888	61.7736
	AC5u0009GL001897	156.439	91.872	135.889	154.461	30.07	29.8016	56.5198	58.3016
	AC5u0009GL001898	134.803	79.7496	128.579	139.599	23.5001	27.361	53.5172	45.4629
	AC5u0009GL001899	126.278	77.0898	120.096	125.326	21.8923	24.3145	52.8351	48.5262
	AC5u0009GL001900	110.896	67.6599	110.257	121.338	22.1604	16.7444	51.6898	44.9525
	AC5u0009GL001901	112.522	64.9964	117.66	122.447	22.5477	19.7927	54.2851	45.0495
	AC5u0009GL001902	103.703	61.4939	98.0153	106.478	16.8533	16.895	40.4271	39.7648
	AC5u0009GL001903	159.005	110.209	221.641	248.48	350.692	357.877	631.327	602.582
	AC5u0009GL001904	354.684	270.761	293.456	300.97	57.1501	53.6073	66.2212	65.0925
	AC5u0009GL001905	438.123	340.719	344.897	331.634	68.6852	74.4556	69.4302	76.8518
	AC5u0009GL001906	176.9	134.561	207.29	212.536	44.3261	40.6383	42.9715	32.9822
	AC5u0009GL001907	166.34	128.065	202.327	184.669	37.3781	32.0991	34.8853	30.4528
	AC5u0009GL001908	168.512	149.769	195.305	200.385	51.5143	52.9305	48.2362	41.251
	AC5u0009GL001909	1215.8	983.32	1229.38	1226.28	21.6561	17.7845	28.4546	27.4962
	AC5u0009GL001910	2776.66	2081.93	3053.79	3195.01	46.225	35.4784	75.4972	68.304
	AC5u0009GL001911	2174.99	1520.39	2419.83	2466.41	30.8976	26.6542	50.3485	40.6876
	AC5u0009GL001912	2173.86	1513.53	2497.91	2603.46	32.3865	28.0719	52.0268	41.1731
	AC5u0009GL001913	2119.83	1413.03	2414.68	2508.56	32.8178	26.5822	50.8956	41.7359
	AC5u0009GL001914	2154.45	1488.98	2463.11	2533.2	34.7651	25.5367	56.3096	44.9959
	AC5u0009GL001915	2289.86	1548.97	2441.13	2490.22	31.806	27.1732	49.4415	40.6791
	AC5u0009GL001916	2611.67	1837.18	2811.24	2833.35	33.3744	36.1802	60.1298	48.9192
	AC5u0009GL001917	1858.93	1264.88	2021.77	2053.29	31.0523	25.938	44.3387	43.504
	AC5u0009GL001918	1947.34	1310.56	2127.25	2191.05	30.685	24.3214	44.2304	40.0973
	AC5u0009GL001919	1949.55	1327.51	2246.31	2394.33	24.9759	23.032	52.9371	38.4121
	AC5u0009GL001920	1694.86	1133.85	1903.71	2065.98	25.3153	21.4057	47.4121	37.4176
	AC5u0009GL001921	1717.55	1116.67	2188.56	2306.28	25.3995	23.8698	44.9286	37.1296
	AC5u0009GL001922	1553.03	969.293	1934.23	1994.38	23.2126	18.9688	44.4818	34.7313
	AC5u0009GL001923	2208.96	1352.77	2477.01	2637.01	26.8663	23.3643	58.445	47.8038
	AC5u0009GL001924	2783.67	1718.82	3243.8	3330.96	30.7184	28.1925	72.3183	57.7517
	AC5u0009GL001925	2125.9	1294.68	2653.04	2774.07	25.2675	18.6222	58.3578	47.3952
	AC5u0009GL001926	2800.18	1715.79	3207.88	3473.56	37.0278	28.902	64.7224	55.0444
	AC5u0009GL001927	3333.98	2100.92	4049.66	4221.99	28.9066	28.287	88.9287	68.4072
	AC5u0009GL001928	71.7246	73.0686	90.5326	86.7863	68.238	60.71	74.9181	59.4342
	AC5u0009GL001929	145.161	113.569	124.588	122.211	26.5538	24.7313	22.838	16.9691
	AC5u0009GL001930	521.483	401.279	559.037	556.485	51.9684	52.8628	62.4183	59.2633
	AC5u0009GL001931	38.5842	40.4305	45.2168	39.0385	45.3709	42.7512	43.0353	40.8757
	AC5u0009GL001932	67.6664	72.1671	70.9968	70.744	69.7509	69.0528	66.6323	59.205
	AC5u0009GL001933	55.3185	62.1735	61.7824	60.9406	57.3815	56.6395	62.9358	51.8466
	AC5u0009GL001934	417.861	433.653	315.937	310.388	384.663	379.605	326.849	334.752
	AC5u0009GL001935	401.7	405.324	308.34	300.627	345.29	362.972	325.581	325.392
	AC5u0009GL001936	225.596	237.166	250.634	238.922	253.392	231.359	236.14	229.151
	AC5u0009GL001937	286.945	279.456	279.341	255.669	309.395	299.452	284.51	267.573
	AC5u0009GL001938	221.466	222.595	223.586	223.897	226.095	234.019	242.447	236.009
	AC5u0009GL001939	69.7964	83.9887	99.5953	96.2594	89.7511	83.0737	95.9083	94.3246
	AC5u0009GL001940	450.35	314.24	527.316	529.519	712.879	731.955	723.559	806.786
	AC5u0009GL001941	345.254	290.459	357.802	329.255	400.024	400.298	382.887	432.695
	AC5u0009GL002015	343.117	535.668	136.412	120.552	229.037	216.633	167.003	171.688
	AC5u0009GL002016	3746.36	3332.33	3642.54	3615.28	4188.47	4147.29	3806.99	3970.14
	AC5u0009GL002017	12228.6	8867.69	11927.5	11926.4	13213.6	13024.3	12724.5	13019.1
	AC5u0009GL002018	13.2534	20.8714	24.2831	29.0788	10.8986	19.0532	27.653	30.6835
	AC5u0009GL002019	460.775	388.477	248.184	244.068	24.7548	26.1797	26.8411	22.8109
	AC5u0009GL002020	86.503	78.384	83.4195	87.614	116.251	111.498	126.674	119.748
	AC5u0009GL002021	61.6248	64.4283	74.1314	60.5806	92.3037	89.2176	96.9053	78.4021
	AC5u0009GL002022	1091.38	1124.35	1445.63	1384.88	944.918	971.685	1265.75	1358.53
	AC5u0009GL002023	200.309	194.963	366.158	324.815	461.674	480.887	506.467	542.12
	AC5u0009GL002024	150.543	197.439	123.571	127.027	233.725	242.578	220.331	233.519
	AC5u0009GL002025	208.122	470.376	265.771	248.114	269.473	283.544	236.83	248.915
	AC5u0009GL002026	590.287	571.38	561.859	565.169	356.788	343.653	391.321	385.156
	AC5u0009GL002027	353.57	273.949	249.939	243.367	98.2673	96.6352	117.024	115.451
	AC5u0009GL002028	293.967	188.237	161.615	156.995	57.7606	49.9991	70.3855	62.102
	AC5u0009GL002029	26.1179	28.1857	36.1585	35.5666	33.6517	31.379	43.2782	29.2614
	AC5u0009GL002030	157.531	175.748	218.246	230.286	142.976	139.873	155.555	143.895
	AC5u0009GL002031	366.362	369.837	537.963	574.541	343.595	325.267	363.321	358.357
	AC5u0009GL002032	294.848	307.941	423.574	449.369	240.834	305.354	292.944	310.286
	AC5u0009GL002033	240.433	203.319	205.154	211.787	387.816	384.232	364.174	393.321
	AC5u0009GL002034	327.955	265.775	232.946	234.028	553.554	556.371	414.643	421.661
	AC5u0009GL002035	24.7434	17.3143	42.7616	44.5532	32.7395	36.9452	38.8339	40.9262
	AC5u0009GL002036	294.114	225.996	138.547	148.736	3054.84	3042.14	1270.89	1575.36
	AC5u0009GL002037	46.3613	44.6518	106.707	110.359	85.9992	87.1862	101.823	88.787
	AC5u0009GL002038	14.8044	21.2097	22.9523	21.3212	58.2538	53.6789	39.3161	38.2703
	AC5u0009GL002039	14.2526	15.4821	18.2858	18.7091	48.6159	45.407	32.5726	30.7322
	AC5u0009GL002040	10.2076	8.04751	14.2229	12.3544	14.1854	12.6808	18.067	14.0399
	AC5u0009GL002041	6.93719	7.48373	11.2881	10.2075	12.8385	12.9532	12.9319	10.1061
	AC5u0009GL002042	102.219	115.185	137.907	131.667	52.7554	53.0957	77.7377	71.859
	AC5u0009GL002043	249.382	262.047	302.39	282.146	132.293	139.017	164.185	165.243
	AC5u0009GL002044	53.7819	63.7625	78.3534	82.8305	58.1257	53.4985	53.8878	61.8284
	AC5u0009GL002045	31.2878	42.6136	53.1439	52.6985	54.8885	52.7321	60.6554	50.0786
	AC5u0009GL002046	46.9319	38.8181	50.7662	50.6956	316.511	305.413	196.518	207.032
	AC5u0009GL002047	6.72485	7.37503	7.87732	7.35788	324.283	301.103	185.744	188.558
	AC5u0009GL002048	45.1933	42.4665	55.5735	51.7915	68.2458	70.2248	77.9035	66.9369
	AC5u0009GL002049	34.3002	43.1914	45.354	43.3434	64.816	67.4331	57.8294	50.8186
	AC5u0009GL002050	749.958	773.095	945.805	972.201	843.945	841.501	842.999	839.216
	AC5u0009GL002051	78.6031	79.7969	70.4705	58.1267	74.4365	69.3327	76.1512	71.0189
	AC5u0009GL002052	46.655	41.8735	50.9911	51.8576	49.2248	49.3538	58.2447	54.9962
	AC5u0009GL002053	58.7216	52.7446	70.8964	74.774	58.9626	65.5286	70.7822	75.4435
	AC5u0009GL002054	80.0939	68.0393	103.743	100.966	81.2658	80.1606	99.2439	86.9106
	AC5u0009GL002055	141.589	124.592	355.643	341.392	173.455	153.963	258.905	235.844
	AC5u0009GL002056	132.097	172.058	176.345	168.769	180.14	172.244	197.085	187.013
	AC5u0009GL002057	117.739	141.363	139.949	144.833	114.222	121.916	123.615	121.362
	AC5u0009GL002058	97.7122	121.763	129.576	151.835	93.7074	107.243	124.528	123.415
	AC5u0009GL002059	53.9693	79.3539	61.7721	61.2024	58.6827	56.0655	64.2795	61.4651
	AC5u0009GL002060	21.7943	39.186	22.1523	20.1438	20.0093	17.5757	29.8145	14.6104
	AC5u0009GL002061	27736.8	26315.7	37493.7	39281.4	17171.7	17480	29445.7	26712.2
	AC5u0009GL002062	105.182	89.1189	104.272	106.421	137.322	141.532	157.796	151.526
	AC5u0009GL002063	167.466	161.089	186.169	187.034	230.845	223.873	176.439	172.92
	AC5u0009GL002064	46.7873	44.8113	29.3289	34.0765	91.6864	78.2857	60.5749	54.0744
	AC5u0009GL002065	116.923	107.728	304.377	331.505	124.178	122.185	247.593	238.421
	AC5u0009GL002066	69.4141	66.72	66.2367	71.9504	67.4035	73.1851	70.794	58.8399
	AC5u0009GL002067	67.749	64.9726	60.1389	55.5449	103.077	109.992	97.2726	86.7049
	AC5u0009GL002068	15.8894	20.4877	32.7356	31.5295	42.9759	36.7425	48.2868	35.6952
	AC5u0009GL002069	103.763	95.7397	114.628	115.037	133.792	119.564	109.326	109.984
	AC5u0009GL002070	78.2265	69.4579	81.6269	74.2319	106.088	96.8353	81.489	80.5055
	AC5u0009GL002071	98.7034	78.4786	93.341	85.738	128.322	112.194	94.992	94.0376
	AC5u0009GL002072	88.3523	86.0172	88.2477	77.2547	115.218	108.691	96.8684	90.5318
	AC5u0009GL002073	122.863	213.983	173.064	177.133	168.059	168.643	152.146	161.051
	AC5u0009GL002074	54.7507	76.6282	62.5521	72.2423	93.7938	96.6459	70.555	73.5544
	AC5u0009GL002075	237.111	400.747	145.228	157.661	315.473	294.41	207.949	241.122
	AC5u0009GL002076	195.308	379.035	132.377	159.536	335.261	311.915	220.213	193.226
	AC5u0009GL000096	1379.86	2783.52	802.964	766.896	1314.31	1249.83	973.777	991.816
	AC5u0009GL000097	896.527	951.012	1133.59	1073.06	1019.42	1145.88	1241.01	1472.92
	AC5u0009GL000098	595.856	624.866	770.562	738.961	773.087	776.345	880.658	879.487
	AC5u0009GL000099	791.055	777.341	1111.04	1093.97	1031.73	1023.44	1182.17	1184.45
	AC5u0009GL000100	1188.12	1154.21	1554.12	1612.4	1594.91	1611.77	1737.3	1790.63
	AC5u0009GL000101	696.119	602.19	933.192	944.728	1023.26	993.415	1113.77	1087.37
	AC5u0009GL000102	98.5401	117.083	203.593	208.543	91.9883	113.71	190.611	195.241
	AC5u0009GL000103	3700.29	3795.26	3839.03	3900.81	3637.8	3700.7	4029.99	3902.8
	AC5u0009GL000104	4778.05	4743.2	4273.29	4160.78	4783.1	4696.04	4788.64	4480.85
	AC5u0009GL000105	4189.02	4356.31	4097.98	4085.96	4194	4225.55	4540.15	4266.45
	AC5u0009GL000106	4301.15	4457.94	3902.7	3878.89	4202.58	4185.85	4376.35	4136.89
	AC5u0009GL000107	5266.26	5531.76	4695.8	4723.42	4985.73	5200.3	5014.8	4877.1
	AC5u0009GL000108	4983.94	5211.92	4844.78	4855.62	4691.58	4825.53	4945.71	4516.61
	AC5u0009GL000109	4545.02	4966.1	4671.53	4658.15	4174.7	4501.73	4820.47	5014.82
	AC5u0009GL000110	5190.39	5603.88	4834.64	4727.07	4868.4	4922.94	5011.75	5346.58
	AC5u0009GL000111	85.9459	56.7761	193.971	179.528	273.424	282.246	582.573	614.671
	AC5u0009GL000112	95.5745	155.793	188.391	193.127	114.055	129.114	178.951	184.133
	AC5u0009GL000113	92.8728	162.83	213.401	211.205	117.848	129.432	201.2	192.402
	AC5u0009GL000114	223.147	232.068	224.831	225.148	120.111	115.048	114.238	112.612
	AC5u0009GL000115	885.944	621.371	960.867	961.93	1009.11	1055.6	1305.23	1259.27
	AC5u0009GL000116	424.187	362.725	329.858	346.812	492.341	511.519	445.305	440.827
	AC5u0009GL000117	418.316	393.54	298.499	289.544	605.618	597.574	478.178	479.287
	AC5u0009GL000118	366.262	357.579	261.505	277.266	546.361	566.261	450.083	466.05
	AC5u0009GL000119	326.349	312.735	260.331	268.685	511.322	514.676	437.372	457.364
	AC5u0009GL000120	274.288	276.901	230.295	236.501	455.243	481.907	410.154	413.968
	AC5u0009GL000121	465.37	397.161	419.847	408.498	626.741	636.956	520.964	536.419
	AC5u0009GL000122	570.531	466.748	495.103	479.579	743.874	759.158	581.175	610.018
	AC5u0009GL000123	382.62	332.571	486.409	488.036	403.527	475.072	501.234	610.76
	AC5u0009GL000124	148.09	110.894	157.805	158.738	143.412	147.366	148.434	146.894
	AC5u0009GL000125	333.02	242.239	206.744	206.654	79.8309	84.0329	95.9642	98.3321
	AC5u0009GL000126	472.902	315.574	230.582	254.426	77.4695	74.932	100.084	106.028
	AC5u0009GL000127	2062.94	1518.96	909.116	929.242	68.4498	78.0651	109.861	108.434
	AC5u0009GL000128	38.8043	29.394	56.771	52.7417	41.7138	48.56	61.7124	52.3723
	AC5u0009GL000129	31.1516	15.1792	48.6544	45.7296	13.2838	22.2525	29.6746	24.4126
	AC5u0009GL000130	8.06728	9.04014	11.6794	12.1517	9.19934	8.19976	12.8191	11.1184
	AC5u0009GL000131	11.0178	12.2287	12.4055	13.9902	6.45172	11.7193	14.4431	11.4413
	AC5u0009GL000132	185.001	157.458	213.073	203.318	200.775	219.359	225.372	229.847
	AC5u0009GL000133	20.676	46.0804	18.5225	16.0182	12.3733	17.5774	18.6102	18.5842
	AC5u0009GL000134	28.6218	46.0672	19.4692	21.5134	18.7365	22.051	22.5423	17.645
	AC5u0009GL000135	37.8339	61.1727	33.0944	34.7651	32.9033	34.2382	30.3326	28.4754
	AC5u0009GL000136	235.104	356.653	257.648	246.816	157.6	170.195	230.239	188.455
	AC5u0009GL000137	60.5373	51.2017	86.5394	88.7541	36.1001	38.6732	46.4106	54.0106
	AC5u0009GL000138	263.448	445.235	269.944	282.765	177.459	179.03	204.753	193.439
	AC5u0009GL000139	368.07	628.726	448.569	483.907	260.355	265.625	338.217	299.337
	AC5u0009GL000140	427.731	718.023	481.36	498.17	306.083	313.178	333.383	285.808
	AC5u0009GL000141	47.7621	48.5823	79.1278	93.5551	42.8453	43.3429	74.9986	67.8124
	AC5u0009GL000142	90.575	112.926	76.8367	74.8187	81.9783	86.8544	79.7835	78.9551
	AC5u0009GL000143	2970.57	2111.57	966.163	952.412	111.112	110.484	228.188	207.286
	AC5u0009GL000144	3506.92	2488.24	1130.1	1087.18	123.863	116.625	260.397	230.176
	AC5u0009GL000145	42.8225	46.635	48.2054	48.5546	74.6812	80.9843	72.0524	66.6205
	AC5u0009GL000146	52.1117	35.3114	51.6913	57.5336	53.7031	70.1705	58.5177	79.9236
	AC5u0009GL000147	108.332	144.855	190.032	199.397	94.1083	115.856	149.343	183.112
	AC5u0009GL000148	158.139	141.457	129.228	126.692	184.486	168.175	124.3	133.848
	AC5u0009GL000149	1904.43	1452.37	1539.96	1521.2	973.702	978.471	864.036	837.388
	AC5u0009GL000150	73.803	72.5928	77.7816	70.2975	68.3332	67.0761	66.1521	66.2804
	AC5u0009GL000151	2422.84	2933.65	1406.14	1372.46	962.568	939.561	801.141	915.957
	AC5u0009GL000162	249.212	301.684	332.427	314.516	330.127	323.759	377.514	379.703
	AC5u0009GL000163	1592.14	1364.37	1581.19	1453.84	1443.38	1979.07	2105.23	3241.41
	AC5u0009GL000164	15.3937	11.3476	850.324	939.423	266.929	246.315	223.682	210.994
	AC5u0009GL000165	19.8623	13.8092	1061.33	1113.69	340.921	288.513	292.158	279.851
	AC5u0009GL000166	304.16	237.611	239.391	234.965	296.818	304.604	335.268	334.921
	AC5u0009GL000167	122.952	158.116	197.511	206.956	123.902	120.559	172.834	170.802
	AC5u0009GL000168	455.163	503.74	429.889	414.288	423.866	446.445	491.262	496.411
	AC5u0009GL000169	375.588	447.901	340.536	340.502	397.355	398.742	410.211	397.942
	AC5u0009GL000170	327.589	431.7	327.197	322.524	359.134	366.302	388.979	368.993
	AC5u0009GL000171	133.145	139.695	149.214	139.861	161.67	174.199	163.414	149.832
	AC5u0009GL000172	123.991	130.077	120.42	125.544	152.716	162.451	146.237	141.813
	AC5u0009GL000173	671.008	646.668	1006.35	1004.58	601.06	612.024	905.416	784.119
	AC5u0009GL000174	208.827	310.761	446.129	422.587	216.761	300.458	469.675	478.109
	AC5u0009GL000175	4031.12	2941.61	5670.93	5877.88	3302.22	3640.75	5305.9	5270.19
	AC5u0009GL000176	108.996	120.18	248.033	246.098	92.1145	100.118	223.479	221.569
	AC5u0009GL000177	99.6966	92.7809	241.851	231.536	87.7148	87.5294	189.068	180.403
	AC5u0009GL000178	77.2936	76.3179	64.0085	69.7334	26.9694	25.8159	27.6399	25.4438
	AC5u0009GL000179	167.673	157.102	201.378	189.245	175.802	183.438	193.241	209.071
	AC5u0009GL000180	312.823	234.082	407.5	420.285	456.946	468.037	445.795	448.833
	AC5u0009GL000181	793.825	566.396	903.227	937.746	1167.3	1134.49	974.152	980.908
	AC5u0009GL000182	824.709	604.366	952.73	991.815	1274.89	1250.66	1072.3	1061.6
	AC5u0009GL000183	546.566	421.897	776.909	784.924	824.4	810.593	818.849	859.919
	AC5u0009GL000184	33.6818	31.2973	90.521	83.9837	71.4853	89.4164	96.3394	103.816
	AC5u0009GL000185	215.41	277.066	256.005	249.275	161.133	160.217	229.688	233.337
	AC5u0009GL000186	102.532	126.96	100.966	101.109	95.0799	97.7972	121.298	110.499
	AC5u0009GL000187	743.227	763.286	735.049	709.56	865.347	877.032	923.571	928.672
	AC5u0009GL000188	659.47	718.927	623.612	623.288	828.948	816.648	824.019	793.251
	AC5u0009GL000189	886.692	1012.72	806.441	788.134	1148.68	1092.66	1093.24	979.548
	AC5u0009GL000190	938.061	1037.89	905.066	857.226	1159.42	1082.87	1161.7	1056.01
	AC5u0009GL000191	712.387	764.924	689.549	703.968	874.59	859.048	894.969	905.3
	AC5u0009GL000192	826.639	963.101	775.294	747.407	1026.74	1018.85	1000.16	984.409
	AC5u0009GL000193	196.795	207.54	171.424	170.205	234.274	240.255	219.454	211.808
	AC5u0009GL000194	559.43	551.381	429.2	428.722	557.751	529.55	521.035	512.831
	AC5u0009GL000195	436.398	463.953	348.319	332.301	459.98	441.911	431.029	425.779
	AC5u0009GL000196	330.169	360.511	271.6	269.57	337.828	349.827	321.136	333.48
	AC5u0009GL000197	374.783	420.409	341.809	339.202	399	409.75	428.78	422.293
	AC5u0009GL000198	1465.79	1634.75	1060.19	999.831	1431.96	1464.12	1434.01	1381.69
	AC5u0009GL000199	1126.33	1211.86	791.806	793.816	1092.57	1114.11	1077.94	1018.61
	AC5u0009GL000200	3220.22	3503.48	2330.74	2301.79	3540.54	3509.28	3154.65	3328.44
	AC5u0009GL000201	6228.91	7002.9	4326.5	4318.77	6923.67	6607.26	5777.69	5777.92
	AC5u0009GL000202	47.9232	57.1247	34.1753	32.5712	79.6375	75.3813	54.9776	60.9725
	AC5u0009GL000203	45.9398	58.3589	28.1349	27.9719	69.9847	76.4294	46.5706	55.1778
	AC5u0009GL000204	39.8974	44.406	24.2137	22.5509	57.6644	64.2366	42.4325	42.1198
	AC5u0009GL000205	191.012	184.517	180.083	176.419	231.563	239.145	217.202	213.202
	AC5u0009GL000206	810.342	890.762	1011.46	929.99	801.389	955.921	1032.38	1226.04
	AC5u0009GL000207	758.16	943.296	1281.52	1270.83	604.093	548.733	976.611	863.357
	AC5u0009GL000208	414.823	589.313	441.947	427.308	356.611	337.302	439.346	428.379
	AC5u0009GL000209	124.175	119.413	160.214	152.059	155.705	160.2	159.731	161.899
	AC5u0009GL000210	94.2027	87.2767	106.157	96.0204	102.632	121.153	117.129	111.135
	AC5u0009GL000221	1227.31	1359.48	684.885	678.004	1700.86	1761.96	1651.56	1761.57
	AC5u0009GL000222	940.682	1028.94	528.767	526.279	1353.84	1371.09	1288.24	1276.71
	AC5u0009GL000223	899.806	947.662	527.85	527.429	1401.9	1319.82	1271.29	1231.06
	AC5u0009GL000224	1028.67	1081.74	648.839	616.852	1615.66	1465.13	1513.06	1381.89
	AC5u0009GL000225	1386.87	1399.21	813.54	812.622	2211.88	1970.32	1987.94	1812.73
	AC5u0009GL000226	1404.39	1415.11	799.045	788.436	2380.94	2086.66	1930.25	1711.77
	AC5u0009GL000227	1102.84	1117.23	678.551	666.135	1867.09	1808.49	1613.8	1506.39
	AC5u0009GL000228	1200.41	1259.3	676.802	659.565	2098.75	2153.17	1656.23	1680.25
	AC5u0009GL000229	1519.47	1674.6	774.307	772.658	2502.07	2392.73	1965.06	1893.87
	AC5u0009GL000230	6220.17	7791.44	2727.05	2608.82	8226.54	8004.66	6407.18	6256.6
	AC5u0009GL000231	4412.9	5313.2	2350.02	2285.55	5926.25	5747.23	5100.63	5000.3
	AC5u0009GL000232	5018.58	5982.96	2567.66	2547.88	6863.71	6429.15	5390.61	5044.61
	AC5u0009GL000233	4661.91	5582.27	2828.9	2731.63	6256.28	6070.22	5666.83	5306.18
	AC5u0009GL000234	52.9752	87.9437	43.8552	38.671	66.0777	72.0436	61.494	54.5382
	AC5u0009GL000235	91.0668	126.353	134.262	128.514	45.7877	64.8614	215.678	272.038
	AC5u0009GL000236	14.0025	27.1126	5.46369	3.56876	41.5962	40.079	39.449	38.8273
	AC5u0009GL000237	8.27308	20.0609	3.12211	6.91902	67.8566	57.3518	67.2539	57.8406
	AC5u0009GL000238	8.0561	22.947	7.97805	8.97552	70.682	67.8474	68.94	73.8608
	AC5u0009GL000239	6.98328	18.6344	4.67389	7.80719	98.8425	78.6187	92.2238	75.8168
	AC5u0009GL000240	45.7591	28.5652	57.0524	59.3899	68.2213	68.2943	80.5102	82.2372
	AC5u0009GL000241	50.1324	27.5584	54.1512	50.9823	67.5443	69.1894	81.0896	78.4391
	AC5u0009GL000242	83.8625	59.1449	136.868	130.551	74.7121	72.3819	119.402	105.592
	AC5u0009GL000243	14.6843	12.9504	17.7785	19.9346	9.46992	6.07487	15.0183	14.7443
	AC5u0009GL000244	10.1756	14.1994	21.8694	22.3254	9.33122	8.20455	20.4424	16.4995
	AC5u0009GL000245	901.692	806.749	1173.85	1144.19	213.802	188.899	677.151	589.966
	AC5u0009GL000246	1144.42	944.78	1368.18	1288.38	271.504	224.695	783.088	668.986
	AC5u0009GL000247	909.485	717.682	1062.59	1044.5	222.072	186.739	622.874	530.024
	AC5u0009GL000248	819.366	598.083	969.393	938.185	196.317	179.222	614.055	555.205
	AC5u0009GL000249	148.791	121.696	269.405	277.903	64.9641	55.2056	223.508	185.355
	AC5u0009GL000250	228.356	161.454	356.312	363.715	110.737	86.8212	279.722	240.254
	AC5u0009GL000251	229.109	155.636	345.456	335.696	104.476	88.6067	265.466	222.893
	AC5u0009GL000252	246.235	176.233	399.889	389.206	107.834	101.165	294.934	257.566
	AC5u0009GL000253	253.205	194.555	408.627	378.319	118.382	91.4274	295.23	235.853
	AC5u0009GL000254	269.6	242.124	477.76	453.991	126.701	113.7	379.211	326.613
	AC5u0009GL000255	242.195	422.896	333.728	331.447	103.984	102.23	176.229	169.635
	AC5u0009GL000256	214.55	359.657	287.2	272.966	89.7216	81.9546	158.903	157.725
	AC5u0009GL000257	231	158.242	446.702	410.398	80.0027	79.2772	273.108	231.088
	AC5u0009GL000258	188.948	128.462	374.955	338.619	63.9743	59.4602	224.064	175.157
	AC5u0009GL000259	159.292	110.843	299.879	296.942	67.8613	52.519	184.264	163.859
	AC5u0009GL000260	650.201	535.128	828.812	799.73	143.124	126.721	410.874	370.275
	AC5u0009GL000261	972.122	786.778	1091.03	1039.71	240.655	224.768	581.717	562.735
	AC5u0009GL000262	894.394	762.957	1035.95	1037.01	226.886	213.607	546.865	506.694
	AC5u0009GL000263	34.4819	26.8451	62.8252	67.3419	24.8972	27.867	60.9835	53.154
	AC5u0009GL000264	40.2237	29.4556	78.4841	78.0549	25.0289	31.2602	68.7814	54.9146
	AC5u0009GL000265	46.8285	31.32	81.4786	77.9497	31.1949	29.412	72.9488	56.7583
	AC5u0009GL000266	277.813	231.548	260.663	244.875	89.5393	78.465	205.121	186.723
	AC5u0009GL000267	105.105	70.5694	194.259	204.849	51.5083	52.0924	129.55	113.157
	AC5u0009GL000268	154.494	100.929	299.979	309.153	84.6008	83.128	236.408	195.232
	AC5u0009GL000269	65.7164	74.7859	75.3747	77.2917	30.2469	26.3607	48.7827	46.5097
	AC5u0009GL000270	82.6232	89.7295	122.515	135.953	34.2261	37.7173	77.827	69.363
	AC5u0009GL000271	110.253	105.776	224.295	253.527	61.0186	64.8557	116.284	118.197
	AC5u0009GL000272	64.0444	106.957	56.6142	57.6828	66.291	69.8597	60.5327	59.0468
	AC5u0009GL000273	66.4258	105.345	68.2373	68.2618	56.6001	62.9048	65.3037	60.3824
	AC5u0009GL000274	211.365	331.542	148.669	147.621	107.559	106.783	116.22	113.142
	AC5u0009GL000275	104.239	171.804	81.1282	79.0305	55.4096	59.5039	79.7655	79.0945
	AC5u0009GL000276	42.2717	81.207	28.0401	32.5774	32.6272	37.1506	40.7187	44.1905
	AC5u0009GL000287	9708.4	9001.01	7460.83	7241.93	12447.5	12686.2	11365.6	11060.4
	AC5u0009GL000288	8172.62	6940.34	6445.72	6287.2	11036.6	10890.9	10166.5	9744.4
	AC5u0009GL000289	6643.81	5669.72	5288.1	5420.59	8577.25	8541.99	7867.06	8277.92
	AC5u0009GL000290	9597.34	8378.63	6694	6828.81	13042.6	12480.3	10441.5	9752.28
	AC5u0009GL000291	8075.33	7070.59	5933.09	5760.97	10468.7	10186.8	9114.64	9184.91
	AC5u0009GL000292	10628.3	9654.01	7029.62	6975.98	12946.7	13206	10895.7	11485.6
	AC5u0009GL000293	9226.63	8399.28	6066.28	6193.59	12164.9	11887.2	9116.56	9397.03
	AC5u0009GL000294	7226.23	6698.92	5465.27	5374.42	9006.09	9229.37	8076.19	8188.36
	AC5u0009GL000295	10180	9655.89	6809.76	6675.66	13074.9	12842.9	10716.4	10442.4
	AC5u0009GL000296	14270.8	13882.9	9508.66	9331.68	17693.2	18103.5	15061.6	14773.6
	AC5u0009GL000297	11122.3	10873.1	7735.11	7818.51	14053.5	13897.7	11875.5	11950.5
	AC5u0009GL000298	9373.45	9115.5	6926.86	6882.86	11876.8	11662.7	10492	10577.5
	AC5u0009GL000299	10875.3	10715.9	7465.25	7747.86	13784.4	13975.8	11402.1	11901.1
	AC5u0009GL000300	7896.57	8094.4	6023.22	6018.65	10205.7	9609.52	9106.14	8882.92
	AC5u0009GL000301	11160.1	11320.7	9061.97	9039.1	13880.1	13767	12894.2	12314.4
	AC5u0009GL000302	9291.61	9380.75	7033.03	6873.19	11509.3	11171.9	10295.8	10369.5
	AC5u0009GL000303	8007.97	8286.56	5924.67	5842.25	10081.2	9934.36	8873.03	9119.6
	AC5u0009GL000304	9259.96	9281.82	6503.83	6659.35	11477	11674.1	9659.37	9305.35
	AC5u0009GL000305	7436.19	7509.08	5504.01	5605.09	9274.99	9336.25	8029.09	7808.56
	AC5u0009GL000306	10901.4	11265.4	7986.95	8036.59	14186.5	13695.3	12280.9	11367.1
	AC5u0009GL000307	7661.14	8183.33	6376.04	6512.51	9078.54	9893.89	9255.74	9730.73
	AC5u0009GL000308	5402.75	6036.86	4804.42	4730.85	7124.11	6872.88	6625.88	6505.35
	AC5u0009GL000309	5007.02	5696.96	4606.98	4425.01	6784.58	6483.59	6385.25	6683.79
	AC5u0009GL000310	9046.28	10729.2	6718.57	6523.5	12321.9	11398	9541.95	9173.39
	AC5u0009GL000311	12712.2	14602.9	9272.98	9018.43	15149	16084.3	13263.9	14742.8
	AC5u0009GL000312	9289.77	11128	7192.87	7096.4	12047.3	11939.2	10158.3	10005.9
	AC5u0009GL000313	8131.4	9556.72	6871.14	6916.13	9999.19	10541.5	8811.34	9247.26
	AC5u0009GL000314	7692.7	9037.06	5829.44	5717.66	9744.83	9543.91	8216.18	8119.91
	AC5u0009GL000315	6283.19	7675.68	5677.73	5565.14	7570.31	7950.2	7889.65	8264.17
	AC5u0009GL000316	111.34	125.682	125.572	125.18	158.43	168.641	157.167	152.1
	AC5u0009GL000317	96.4713	105.522	108.424	110.839	152.378	146.206	141.697	137.441
	AC5u0009GL000318	101.142	107.463	106.273	94.0002	148.405	153.323	136.634	126.129
	AC5u0009GL000319	147.068	154.015	127.625	127.647	227.075	213.075	187.611	170.437
	AC5u0009GL000320	14735	19034	9853.33	9693.7	15342.9	15977.8	11788.6	12981.4
	AC5u0009GL000321	10182.9	13134.7	7593.71	7723.03	9840.6	10733.5	9064.51	10961.3
	AC5u0009GL000322	3904.41	4157	3169.52	3010.04	3668.17	3887.92	4138.31	4359.58
	AC5u0009GL000323	288.9	310.294	355.114	350.485	350.075	406.029	405.038	467.402
	AC5u0009GL000324	259.017	258.132	309.063	287.554	314.621	346.489	355.331	385.072
	AC5u0009GL000325	390.135	356.168	650.435	644.908	433.624	465.505	539.079	547.179
	AC5u0009GL000326	151.329	121.129	194.221	191.651	330.837	324.453	310.993	291.99
	AC5u0009GL000327	221.112	196.586	328.547	325.748	408.075	430.142	428.449	435.706
	AC5u0009GL000328	487.383	462.871	771.262	740.869	761.025	755.549	811.624	818.698
	AC5u0009GL000329	369.356	241.694	316.193	312.307	471.449	513.41	504.124	561.47
	AC5u0009GL000330	426.071	272.243	310.008	329.166	567.347	578.382	497.52	450.686
	AC5u0009GL000331	572.605	384.708	462.64	465.588	760.591	729.39	671.478	676.28
	AC5u0009GL000332	556.227	414.545	491.136	482.732	712.637	762.897	695.097	700.618
	AC5u0009GL000333	168.212	236.03	113.316	114.28	134.127	132.524	124.173	118.116
	AC5u0009GL000334	71.154	100.179	56.4554	45.3003	60.3997	62.3392	53.3013	38.103
	AC5u0009GL000335	106.882	111.371	90.2206	87.865	77.5297	84.5034	87.8771	89.3375
	AC5u0009GL000336	115.252	109.497	91.8076	91.6996	84.3761	83.6896	92.5217	87.323
	AC5u0009GL000337	111.696	116.413	100.035	97.2488	94.8421	94.0268	101.242	95.7327
	AC5u0009GL000338	104.107	103.705	89.476	84.1654	84.116	79.6441	90.6888	87.4368
	AC5u0009GL000339	134.535	155.351	160.152	182.394	105.905	100.709	133.106	135.144
	AC5u0009GL000340	176.81	183.559	192.525	206.617	126.474	120.856	174.687	148.53
	AC5u0009GL000341	190.48	226.627	236.847	237.102	145.896	131.911	181.001	168.985
	AC5u0009GL000342	206.292	215.806	258.979	246.981	172.561	150.633	201.596	196.213
	AC5u0009GL000343	3114.94	4053.82	4163.58	4104.78	1715.06	1827.84	3095.42	3174.24
	AC5u0009GL000344	812.119	766.383	956.625	951.557	605.697	669.11	897.642	862.174
	AC5u0009GL000345	22.0346	14.2227	33.9413	33.6034	32.6881	32.5829	42.8203	39.3153
	AC5u0009GL000346	28.1912	19.0789	38.7142	38.022	37.8456	36.8009	51.4086	58.6848
	AC5u0009GL000347	26.7765	22.6606	43.5235	49.4637	40.5025	48.0742	53.9153	64.322
	AC5u0009GL000349	192.605	229.921	265.83	267.738	194.106	206.276	219.112	221.879
	AC5u0009GL000350	2175.19	3224.02	1588.11	1542.26	2702.61	2700.63	2385.8	2505.35
	AC5u0009GL000351	617.086	542.274	571.279	561.472	677.111	679.295	696.029	708.637
	AC5u0009GL000352	1770.91	2643.55	1463.88	1477.45	2105.11	2098.67	1879.86	1898.37
	AC5u0009GL000353	6677.86	10714	4308.48	4013.92	6359.1	7518.9	6463.41	8662.84
	AC5u0009GL000354	56.0116	75.6406	65.6738	68.0073	58.854	57.2409	74.7855	65.0803
	AC5u0009GL000355	64.3501	84.7594	77.0715	78.8896	75.1285	75.2065	89.9797	85.2566
	AC5u0009GL000356	252.111	232.07	298.787	288.278	277.458	284.943	267.266	261.388
	AC5u0009GL000357	118.823	96.1746	151.387	150.421	19.363	20.0825	31.4411	28.4724
	AC5u0009GL000358	106.785	87.2202	134.473	137.55	16.4576	19.6866	29.7152	25.0553
	AC5u0009GL000359	101.169	76.3716	105.643	111.9	18.1084	19.5533	23.6158	22.5521
	AC5u0009GL000360	100.003	80.0423	97.427	103.559	17.2373	16.2505	24.1975	23.2549
	AC5u0009GL000361	143.411	134.705	176.754	165.192	36.9589	38.5425	53.6583	48.9975
	AC5u0009GL000362	290.333	413.878	382.501	366.283	215.815	258.019	284.931	287.953
	AC5u0009GL000363	972.805	1323.44	979.001	958.181	1062.25	1056.27	1008.04	1099.01
	AC5u0009GL000364	881.951	1172.94	902.317	915.476	953.777	974.506	925.682	895.029
	AC5u0009GL000365	1282.61	2382.22	522.69	508.877	1051.82	1102.31	814.445	846.672
	AC5u0009GL000366	1058.76	1965.99	323.994	318.604	994.865	992.578	651.543	701.341
	AC5u0009GL000367	74.8369	162.143	19.7158	18.802	68.0195	61.123	48.4843	53.1304
	AC5u0009GL000368	907.481	849.869	1294.94	1320.64	1321.79	1329.31	1324.77	1334.49
	AC5u0009GL000369	1230.32	1128.7	1934.58	1947.86	1743.59	1734.16	1793.13	1745.98
	AC5u0009GL000370	754.09	671.559	1246.3	1243.4	1106.5	1076.99	1185.05	1170.44
	AC5u0009GL000371	739.763	625.553	1213.6	1239.15	1078.21	1066.84	1193.51	1149.62
	AC5u0009GL000372	1176.4	1029.97	2143.81	2072.85	1792.31	1829.91	1983.9	2147.36
	AC5u0009GL000373	172.127	147.947	179.895	185.84	185.306	193.804	201.253	193.562
	AC5u0009GL000374	226.828	183.769	211.294	218.067	259.672	252.69	254.357	251.191
	AC5u0009GL000375	294.295	237.871	296.106	273.863	335.851	323.43	329.589	330.884
	AC5u0009GL000376	16.4811	14.844	22.7404	17.7124	27.3849	34.5288	46.9566	40.1333
	AC5u0009GL000377	99.2184	80.5438	211.795	209.558	94.8238	97.4996	151.132	140.647
	AC5u0009GL000378	18.4919	15.695	35.8286	37.0265	48.1629	54.9589	78.4761	73.804
	AC5u0009GL000379	110.893	83.7559	191.027	190.271	204.987	239.847	250.295	288.225
	AC5u0009GL000380	118.357	89.0257	187.06	189.608	249.785	246.632	194.722	206.262
	AC5u0009GL000381	98.0743	83.2073	150.429	160.86	192.705	190.988	162.72	155.554
	AC5u0009GL000382	138.296	126.979	211.343	219.467	278.493	269.933	226.902	237.842
	AC5u0009GL000383	894.742	1211.19	957.055	952.241	980.933	962.385	1070.33	1071.18
	AC5u0009GL000384	3145.11	4139.15	2455.68	2392.44	2599.28	2608.19	2633	2894.58
	AC5u0009GL000385	164.825	165.256	194.503	189.954	246.191	254.028	265.079	262.591
	AC5u0009GL000386	340.927	311.14	392.371	344.539	546.414	544.364	547.235	535.211
	AC5u0009GL000387	1340.13	1334.39	2182.05	2203.3	2078.23	2039.72	2348.94	2336.1
	AC5u0009GL000388	145.279	144.329	288.511	312.027	196.245	195.143	240.095	224.541
	AC5u0009GL000389	678.027	807.533	580.81	587.791	826.716	865.198	656.235	647.814
	AC5u0009GL000390	921.097	1044.61	827.201	849.424	1155.61	1136.24	990.789	1009.01
	AC5u0009GL000391	14.6843	25.655	25.5382	22.9898	21.7155	23.7555	37.2328	36.4874
	AC5u0009GL000394	150.529	109.844	108.497	108.134	140.347	135.86	172.963	175.658
	AC5u0009GL000395	205.53	151.195	155.418	159.964	191.189	204.397	223.928	220.589
	AC5u0009GL000396	4155.71	2782.94	1163.49	1071.97	1393.92	1417.06	974.034	1075
	AC5u0009GL000397	70.4811	59.6773	90.5788	88.7788	123.342	133.392	111.805	112.072
	AC5u0009GL000398	38.8436	33.2186	41.4214	46.4201	60.9296	66.2899	61.8834	56.8552
	AC5u0009GL000399	275.973	268.767	642.987	638.319	470.428	474.421	580.617	564.637
	AC5u0009GL000400	62.4325	45.1501	151.886	153.856	178.444	181.383	216.239	216.212
	AC5u0009GL000401	97.2096	102.585	223.065	226.405	249.993	255.375	324.968	314.153
	AC5u0009GL000402	78.3094	79.2807	156.467	144.717	153.207	157.665	185.595	166.486
	AC5u0009GL000403	102.084	97.6682	221.448	225.385	196.312	200.44	244.348	232.706
	AC5u0009GL000404	129.263	123.027	299.981	283.725	261.893	254.156	312.519	315.602
	AC5u0009GL000405	122.997	120.383	275.18	256.537	250.755	259.865	285.19	277.084
	AC5u0009GL000406	46.3851	28.1826	39.6372	39.6036	66.3392	62.2512	53.9631	49.1097
	AC5u0009GL000407	723.021	510.509	693.815	723.995	490.387	478.626	513.897	509.142
	AC5u0009GL000408	782.578	519.552	719.235	759.901	562.988	526.611	581.136	568.749
	AC5u0009GL000409	219.626	151.34	119.646	133.342	67.4926	65.6257	50.3755	46.1651
	AC5u0009GL000410	329.061	363.704	237.344	242.259	375.377	398.142	330.826	320.124
	AC5u0009GL000411	517.104	625.441	463.265	441.324	422.716	433.69	399.354	410.9
	AC5u0009GL000412	99.1306	86.4072	82.0722	84.0116	114.03	107.077	104.269	102.609
	AC5u0009GL000413	73.2718	71.9074	69.2975	68.3645	94.195	84.2285	78.6367	77.2572
	AC5u0009GL000414	41.3069	41.3504	74.6283	75.8116	70.6687	73.6033	91.1235	85.8507
	AC5u0009GL000415	33.6492	25.6482	54.4559	69.4485	52.7574	61.8841	92.23	86.4387
	AC5u0009GL000416	59.1483	61.651	81.4118	79.0618	68.6331	86.4896	80.1832	74.1941
	AC5u0009GL000417	7.73424	11.784	10.832	13.5811	12.5677	10.9216	13.8508	10.1874
	AC5u0009GL000418	782.27	1366.38	1608.08	1791.13	591.804	597.393	1046.1	954.873
	AC5u0009GL000419	73.2342	65.359	208.393	208.289	231.512	238.95	229.873	215.015
	AC5u0009GL000420	75.2715	75.6732	254.674	256.386	287.127	273.2	290.667	277.077
	AC5u0009GL000421	1244.76	1079.74	2232.79	2384.5	1063.84	1115.75	1467.87	1441.99
	AC5u0009GL000422	31.3328	24.8481	48.3537	39.9361	35.8745	36.3132	38.5063	28.809
	AC5u0009GL000423	114.398	145.833	106.13	100.235	174.25	167.48	128.912	121.593
	AC5u0009GL000424	797.287	1018.56	692.19	650.034	927.298	914.393	759.149	703.15
	AC5u0009GL000425	135.371	187.422	133.482	143.535	119.046	123.527	130.664	97.7471
	AC5u0009GL000426	137.045	160.652	142.402	141.858	123.813	119.839	110.976	107.894
	AC5u0009GL000427	53.1283	61.7258	62.6569	56.7803	89.753	92.0884	79.381	82.2263
	AC5u0009GL000428	355.499	361.017	413.859	406.152	345.861	336.827	385.087	353.138
	AC5u0009GL000429	692.056	435.947	914.125	910.183	1065.86	1059.24	1131.52	1112
	AC5u0009GL000430	11.1954	10.0739	14.1536	16.1849	65.0455	114.512	63.3173	112.319
	AC5u0009GL000431	24.0936	17.578	29.7014	26.6992	50.4924	58.5289	49.7879	60.8389
	AC5u0009GL000432	15.2169	13.4463	23.7868	22.2042	30.2473	33.0879	40.6347	37.5952
	AC5u0009GL000433	32.3642	24.0655	45.4219	48.6346	60.8223	54.2411	70.7642	85.6218
	AC5u0009GL000434	74.3606	68.4033	90.5425	92.3531	262.231	259.142	163.408	173.597
	AC5u0009GL000435	14.484	15.9705	29.728	24.5315	40.8897	39.1007	45.1515	47.4739
	AC5u0009GL000436	88.2969	62.0999	285.121	229.377	278.333	366.236	541.933	1129.1
	AC5u0009GL000437	12.8809	18.7472	32.4304	32.0332	25.9572	30.1067	42.1736	41.1978
	AC5u0009GL000438	1137.62	2467.11	748.998	694.87	284.888	270.182	255.602	266.795
	AC5u0009GL000439	46.4145	56.6601	69.4562	51.7738	110.081	104.021	71.9046	70.652
	AC5u0009GL000440	78.9994	81.6758	129.173	129.497	123.882	115.48	111.322	99.1328
	AC5u0009GL000441	50.2677	55.1872	57.6206	58.5188	87.8204	83.9239	79.1805	76.5533
	AC5u0009GL000442	54.5617	54.8748	70.5441	57.9659	82.5617	75.7178	64.9748	61.2362
	AC5u0009GL000443	118.971	123.578	242.689	243.725	154.842	160.11	229.779	199.877
	AC5u0009GL000444	40.8574	43.8025	67.3406	71.3286	58.1589	54.6449	73.653	57.3408
	AC5u0009GL000445	44.1349	48.7193	78.1419	75.8838	55.086	56.5284	76.6485	66.4425
	AC5u0009GL000446	463.779	380.458	861.266	862.884	431.363	423.865	532.964	514.176
	AC5u0009GL000447	205.7	188.167	472.226	495.846	172.408	168.481	294.143	259.716
	AC5u0009GL000448	427.031	338.848	818.114	837.285	630.964	632.412	703.17	670.014
	AC5u0009GL000449	165.864	240.586	175.764	160.982	188.909	185.013	213.274	210.768
	AC5u0009GL000450	86.1549	148.46	85.5289	80.1019	87.1886	81.5684	89.5599	83.0531
	AC5u0009GL000451	116.564	203.561	86.1702	78.011	118.327	94.9139	94.4787	96.8953
	AC5u0009GL000452	328.259	331.364	341.531	345.772	519.423	522.537	510.778	495.854
	AC5u0009GL000453	711.539	594.304	601.798	597.847	1089.99	1062.36	880.954	857.921
	AC5u0009GL000454	129.196	115.076	78.8664	77.0988	192.243	181.164	142.306	145.397
	AC5u0009GL000455	83.6132	66.4424	45.3634	42.8067	133.728	127.543	93.21	90.4157
	AC5u0009GL000456	126.545	100.273	66.9034	65.2259	143.718	121.277	91.4262	80.9408
	AC5u0009GL000457	77.7029	56.8964	35.8226	40.0878	97.1368	81.4063	63.8968	58.6042
	AC5u0009GL000458	55.3185	42.1845	25.0798	23.1171	72.766	60.3256	49.748	47.9655
	AC5u0009GL000459	382.352	325.273	781.074	792.35	609.866	601.978	780.444	753.633
	AC5u0009GL000460	63.1256	62.5947	82.2021	95.2766	88.3605	91.7592	101.055	94.7073
	AC5u0009GL000461	86.4352	79.3188	123.433	114.411	183.536	185.658	156.293	146.747
	AC5u0009GL000462	33.3294	46.1035	43.3599	45.5442	54.7835	50.9999	57.085	37.2078
	AC5u0009GL000463	37.5661	44.1199	48.3327	44.1193	59.1038	58.0391	57.2992	44.7209
	AC5u0009GL000464	61.972	83.9787	65.4291	49.0551	95.528	93.9513	79.2329	71.6369
	AC5u0009GL000465	211.792	186.478	228.86	250.129	294.37	293.308	254.452	262.637
	AC5u0009GL000466	449.09	405.629	764.105	720.753	741.669	733.899	783.283	827.1
	AC5u0009GL000467	38.0404	26.7041	47.6872	49.4183	85.8812	99.2416	119.045	118.538
	AC5u0009GL000468	50.0833	40.4554	62.7101	66.3038	137.567	140.162	166.331	167.573
	AC5u0009GL000469	92.0615	68.2649	115.742	123.511	258.241	270.734	265.979	259.395
	AC5u0009GL000470	25.4242	26.4531	26.4023	24.5814	33.3929	30.8112	30.5185	31.4595
	AC5u0009GL000471	20.6347	15.0529	17.2063	20.285	30.9081	32.7908	35.8025	26.8934
	AC5u0009GL000472	9.56048	14.78	12.1627	12.7677	19.0804	21.1915	16.2841	13.8663
	AC5u0009GL000473	8.21134	14.1338	15.0252	13.3829	15.8938	20.174	17.1864	5.96944
	AC5u0009GL000474	15.3383	16.0487	16.848	14.2132	19.1551	20.6875	24.682	18.4227
	AC5u0009GL000475	17.748	24.3162	18.9408	21.5259	29.3051	34.6993	34.1118	33.4981
	AC5u0009GL000476	14.1629	13.1835	17.4838	17.854	18.2956	18.9587	23.0655	18.6119
	AC5u0009GL000477	22.404	21.4469	22.5541	25.967	21.7972	24.5316	22.5555	16.4445
	AC5u0009GL000478	19.3151	19.3986	27.2513	24.8361	26.2215	25.3359	25.5129	21.3433
	AC5u0009GL000479	19.0236	18.8148	28.4013	29.5897	28.2738	28.1158	26.2083	29.2377
	AC5u0009GL000480	1.95702	3.85389	3.87613	2.75753	6.16901	5.48124	6.63321	5.64134
	AC5u0009GL000481	77.4518	64.6874	213.355	212.615	94.3301	88.0759	159.819	135.157
	AC5u0009GL000482	30.4252	29.4388	88.1961	82.2363	42.9485	34.789	55.3833	32.6306
	AC5u0009GL000483	77.3927	72.5278	142.392	138.088	95.6653	96.2145	131.958	91.4649
	AC5u0009GL000484	129.265	108.083	189.467	190.611	151.839	142.947	213.962	181.022
	AC5u0009GL000485	95.093	77.6511	174.549	166.851	110.847	113.508	167.308	132.473
	AC5u0009GL000486	95.8335	78.5996	175.331	182.483	119.117	108.656	166	151.016
	AC5u0009GL000487	84.324	65.1373	158.592	169.881	113.551	115.688	162.704	152.068
	AC5u0009GL000488	70.4779	42.3663	476.434	612.833	17.0465	18.9325	168.149	146.301
	AC5u0009GL000489	103.904	108.943	384.184	392.564	63.8618	57.2305	168.269	143.594
	AC5u0009GL000490	45.9916	33.9296	339.105	387.307	35.4837	22.8952	139.556	115.115
	AC5u0009GL000491	46.8858	39.499	302.342	375.362	26.2275	34.2466	121.234	104.525
	AC5u0009GL000492	107.68	90.557	291.316	301.253	81.5765	86.7065	126.461	122.919
	AC5u0009GL000493	8.17205	7.73698	107.817	129.773	6.16485	4.64614	45.1448	34.2279
	AC5u0009GL000494	9.68074	7.50329	114.394	142.75	6.64294	4.38064	45.1509	38.9163
	AC5u0009GL000495	10.117	7.05007	86.4217	105.432	5.1689	5.19921	33.8268	28.7063
	AC5u0009GL000496	11.6249	6.62529	83.7872	88.2051	5.33521	5.84754	27.1737	23.2709
	AC5u0009GL000497	8.41414	4.91046	64.0507	74.268	5.59625	4.54405	23.0251	14.7829
	AC5u0009GL000498	10.1735	5.19864	61.0929	70.9455	5.3449	4.26669	23.2053	7.63707
	AC5u0009GL000499	6.15642	5.83589	39.818	47.2765	6.37508	3.64434	20.1212	11.681
	AC5u0009GL000500	8.10703	6.91754	41.298	43.833	8.51843	5.84351	21.2448	11.5988
	AC5u0009GL000501	9.447	6.16468	45.5564	49.3068	5.32137	7.38767	18.8257	10.1769
	AC5u0009GL000502	11.6635	9.90227	45.149	50.1769	6.06935	6.74088	21.8074	14.4759
	AC5u0009GL000503	11.5625	11.4804	54.4578	63.9647	7.62305	5.55612	30.3571	15.7937
	AC5u0009GL000504	16.5956	14.2655	61.7761	72.8103	5.81257	5.02109	36.2003	20.671
	AC5u0009GL000505	14.464	7.09409	43.4689	59.0584	9.13214	7.40331	17.2443	18.0583
	AC5u0009GL000506	15.937	12.5055	64.7734	68.2353	12.1787	9.0687	30.2332	21.8311
	AC5u0009GL000507	25.4014	13.6965	75.6442	87.1207	13.6418	11.8574	34.95	16.2716
	AC5u0009GL000508	18.9939	11.2655	43.9308	55.7578	11.4044	11.134	28.0226	18.1876
	AC5u0009GL000509	625.077	547.694	974.931	929.55	469.042	426.28	577.922	454.683
	AC5u0009GL000510	1250.65	1048.28	1915.13	1928.91	986.402	870.313	1140.87	1085.14
	AC5u0009GL000511	798.051	681.294	1214.37	1168.21	619.46	572.102	759.16	688.101
	AC5u0009GL000512	76.7686	37.5165	107.401	99.6062	23.4282	27.3378	33.5293	28.8143
	AC5u0009GL000513	838.885	831.259	473.769	669.816	546.169	673.123	635.033	659.563
	AC5u0009GL000514	206.231	185.827	183.12	218.24	95.8565	116.372	137.522	134.633
	AC5u0009GL000515	98.9351	51.1442	115.278	126.989	24.5118	27.7559	34.6549	25.3723
	AC5u0009GL000516	99.1558	41.6587	97.5355	113.721	23.3051	25.6806	32.4874	21.2073
	AC5u0009GL000517	109.5	71.4497	126.578	129.341	65.69	67.2099	68.4715	71.1071
	AC5u0009GL000518	119.026	76.7755	156.208	128.598	80.5184	66.938	78.9741	79.7854
	AC5u0009GL000519	78.5435	25.7289	64.3293	73.1771	17.3916	16.0624	18.8294	17.9026
	AC5u0009GL000520	158.187	83.7164	140.751	156.842	30.3806	31.8719	41.0681	35.1459
	AC5u0009GL000521	356.17	182.97	390.09	433.322	61.8777	63.7631	97.0628	84.6869
	AC5u0009GL000522	212.416	114.022	210.735	222.653	46.1695	43.678	57.9486	52.6494
	AC5u0009GL000523	170.341	87.7756	147.546	153.306	38.7505	31.4911	49.9197	46.1856
	AC5u0009GL000524	174.939	85.7926	125.525	138.858	36.3907	38.072	44.9826	36.9125
	AC5u0009GL000525	218.687	112.939	151.568	172.044	50.1805	41.9155	65.3087	45.2908
	AC5u0009GL000526	216.844	119.339	141.646	154.221	46.8866	42.3654	58.0857	45.1601
	AC5u0009GL000527	161.929	82.6136	121.354	122.644	34.0906	31.1208	41.4758	40.4402
	AC5u0009GL000528	122.897	65.2916	94.611	99.8915	25.5588	31.5916	34.5611	31.4542
	AC5u0009GL000529	156.381	93.8232	122.925	128.423	33.3105	39.9756	47.553	41.6543
	AC5u0009GL000530	88.9176	42.9463	67.3563	71.6332	19.8586	18.2748	24.1013	19.2049
	AC5u0009GL000542	122.302	94.7698	108.096	121.885	160.351	151.147	145.406	139.818
	AC5u0009GL000543	100.08	82.5285	95.4916	92.6434	136.683	132.034	127.699	127.412
	AC5u0009GL000544	72.015	58.3831	72.4288	74.3344	108.54	101.599	102.565	95.1736
	AC5u0009GL000545	266.592	301.923	266.448	268.816	224.757	238.22	257.751	257.533
	AC5u0009GL000546	28.7192	30.3775	32.1281	32.4004	44.4163	44.4712	47.3591	43.9212
	AC5u0009GL000547	31.9512	32.198	39.0673	37.2229	49.2064	46.9707	48.8751	47.0825
	AC5u0009GL000548	14.9967	13.297	27.3692	25.8138	15.6964	16.003	24.0278	20.0449
	AC5u0009GL000549	9.93508	8.5526	24.819	24.7684	14.949	14.5624	25.7659	21.2883
	AC5u0009GL000550	27.0967	22.3544	140.167	143.234	47.8306	46.4481	102.607	98.6502
	AC5u0009GL000551	57.7292	46.1785	52.7722	55.2542	309.426	288.581	181.384	178.907
	AC5u0009GL000552	51.6973	39.2213	44.3417	47.5665	259.174	240.8	148.329	151.857
	AC5u0009GL000553	220.112	200.766	189.609	194.026	599.516	573.777	413.134	400.051
	AC5u0009GL000554	596.14	552.284	639.838	641.859	970.815	1025.11	845.81	907.974
	AC5u0009GL000555	223.091	226.919	229.83	236.478	428.801	430.695	339.988	332.11
	AC5u0009GL000556	35.4412	31.4782	55.937	50.9276	58.7799	63.0519	69.3025	56.882
	AC5u0009GL000557	76.867	122.825	80.2358	75.5644	169.533	166.647	150.996	148.852
	AC5u0009GL000558	4986.02	5576.23	3389.87	3376.1	6078.37	5900.21	5104.34	5326.33
	AC5u0009GL000559	7994.41	8530.96	5010.23	4850.19	9367.44	9034.09	7766.1	7396.14
	AC5u0009GL000560	9471.06	9885.35	5074.19	4867.8	11850.6	10677.3	7936.91	8156.32
	AC5u0009GL000561	278.679	237.856	191.066	190.106	408.638	389.757	358.117	352.364
	AC5u0009GL000562	298.103	281.335	202.866	199.725	472.003	448.72	373.655	374.633
	AC5u0009GL000563	495.306	650.594	299.018	300.917	635.781	598.852	483.265	486.109
	AC5u0009GL000564	933.126	1446.95	597.757	583.311	815.528	1028.98	906.888	1140.75
	AC5u0009GL000565	546.143	473.075	482.709	500.099	839.772	819.33	675	669.133
	AC5u0009GL000566	395.323	359.954	463.966	441.379	615.386	604.009	563.162	568.565
	AC5u0009GL000567	1922.32	2191.05	2336.23	2004.25	1894.58	3041.34	2636.43	5901.2
	AC5u0009GL000568	616.942	593.11	545.851	499.684	890.235	885.742	691.557	687.933
	AC5u0009GL000569	498.28	470.791	420.655	420.642	736.277	734.455	545.913	584.843
	AC5u0009GL000570	145.103	117.003	169.921	161.285	214.566	204.325	177.249	178.954
	AC5u0009GL000571	145.558	126.455	111.231	111.862	209.095	202.618	142.465	136.742
	AC5u0009GL000572	190.264	163.009	135.338	136.561	255.063	266.87	181.001	178.359
	AC5u0009GL000573	1863.09	2652.05	1707.81	1648.87	2984.64	2835.56	2413.78	2378.87
	AC5u0009GL000574	370.886	570.608	300.133	292.233	547.22	534.685	464.528	451.186
	AC5u0009GL000575	370.334	569.281	304.303	289.268	550.724	524.233	504.522	489.873
	AC5u0009GL000576	254.89	218.629	361.88	348.16	529.678	466.04	494.066	499.223
	AC5u0009GL000577	384.657	361.35	525.328	549.502	734.682	691.734	653.094	633.521
	AC5u0009GL000578	308.141	281.612	409.23	411.399	575.808	566.049	561.713	539.153
	AC5u0009GL000579	57.7324	54.8574	68.0915	63.5765	65.1537	57.2795	83.4884	70.4894
	AC5u0009GL000580	99.446	77.7479	91.2149	101.398	113.16	106.922	108.271	96.6039
	AC5u0009GL000581	144.757	130.615	140.891	143.842	166.634	173.349	162.403	163.803
	AC5u0009GL000582	1595.09	1704.94	2221.36	2205.45	1663.67	1614.05	1684.87	1672.25
	AC5u0009GL000583	871.979	670.907	898.032	898.813	1034.99	1027.58	973.61	989.188
	AC5u0009GL000584	274.621	184.227	268.507	266.658	541.232	563.811	446.335	423.061
	AC5u0009GL000585	205.925	144.294	248.616	230.522	465.059	468.392	393.725	413.136
	AC5u0009GL000586	84.7455	68.835	121.466	120.313	139.851	132.572	115.468	105.783
	AC5u0009GL000587	91.8065	79.006	135.343	127.274	136.297	135.238	114.245	121.688
	AC5u0009GL000588	69.1482	54.7231	85.6316	88.7385	116.669	102.146	77.089	80.2405
	AC5u0009GL000589	126.268	112.403	136.238	142.75	165.116	155.027	161.489	162.597
	AC5u0009GL000590	909.682	1812.73	715.757	755.629	908.663	1048.25	904.663	1095.28
	AC5u0009GL000591	307.222	279.898	391.743	391.069	533.469	541.476	504.084	466.658
	AC5u0009GL000592	354.595	308.7	461.795	456.988	635.078	652.571	592.14	566.958
	AC5u0009GL000593	329.196	274.989	458.659	470.648	636.692	615.203	626.749	565.684
	AC5u0009GL000594	352.062	276.126	475.606	475.573	671.778	661.66	595.792	607.762
	AC5u0009GL000595	84.7859	64.8547	93.9678	89.3061	157.689	151.697	130.376	123.729
	AC5u0009GL000596	78.6972	66.0012	114.061	121.71	150.504	181.374	148.845	155.032
	AC5u0009GL000597	344.613	308.952	317.785	314.792	476.544	467.483	397.737	416.477
	AC5u0009GL000598	476.604	409.698	345.578	343.366	673.396	643.349	505.977	484.823
	AC5u0009GL000599	335.262	286.423	291.494	278.945	490.686	495.792	404.632	399.207
	AC5u0009GL000600	317.478	256.397	271.703	253.566	477.197	483.093	386.999	362.591
	AC5u0009GL000601	180.191	122.023	262.052	263.055	253.512	249.992	315.66	303.911
	AC5u0009GL000602	139.204	152.417	139.215	141.136	134.734	135.166	150.892	137.401
	AC5u0009GL000603	2877.12	2189.45	2739.64	2547.46	640.954	540.991	664.643	662.292
	AC5u0009GL000604	237.68	188.1	247.917	256.798	203.816	202.878	219.979	204.485
	AC5u0009GL000605	188.65	150.835	196.67	193.611	153.623	165.737	176.967	173.176
	AC5u0009GL000606	36.7224	27.6922	116.403	110.643	179.068	201.427	335.576	292.702
	AC5u0009GL000607	63.0361	42.1052	170.067	171.145	309.037	323.803	476.706	456.877
	AC5u0009GL000608	44.0092	37.7015	90.442	100.758	76.1203	69.9114	79.5052	83.3636
	AC5u0009GL000609	52.4671	45.5741	105.984	100.353	80.7468	91.511	107.94	101.547
	AC5u0009GL000610	47.7618	44.2723	50.5036	48.0342	255.977	253.133	166.783	181.263
	AC5u0009GL000611	218.65	219.081	380.259	368.734	437.578	465.287	591.399	589.277
	AC5u0009GL000612	57.4124	66.784	81.3243	84.4918	126.024	119.51	157.028	136.277
	AC5u0009GL000613	56.3314	65.0168	73.2843	77.8186	117.52	120.203	138.134	138.968
	AC5u0009GL000614	53.4433	70.5995	90.3824	84.1064	126.596	115.3	149.792	133.87
	AC5u0009GL000615	64.5503	68.862	104.537	105.666	143.298	147.577	177.575	155.714
	AC5u0009GL000616	113.403	136.414	121.95	101.965	132.236	115.799	136.099	126.241
	AC5u0009GL000617	322.535	443.874	256.034	273.749	273.142	246.875	255.455	247.189
	AC5u0009GL000708	163.789	153.456	165.991	177.394	289.578	350.007	297.084	406.86
	AC5u0009GL000709	268.95	390.467	206.585	208.938	193.88	229.771	225.336	230.8
	AC5u0009GL000710	195.959	268.55	138.833	142.981	139.896	151.955	140.766	131.337
	AC5u0009GL000711	1004.5	1086.95	1212.64	1165.87	1495.76	1513.86	1386.19	1457.36
	AC5u0009GL000712	25.2628	23.5437	12.7499	11.4848	61.3783	67.8196	41.6187	38.5582
	AC5u0009GL000713	31.969	35.5582	35.7808	31.9331	36.9031	38.8092	44.4246	41.1016
	AC5u0009GL000714	25.4975	21.1192	25.5331	24.6869	54.7963	58.4744	48.6566	48.0179
	AC5u0009GL000715	102.559	87.6463	132.567	141.758	164.976	174.28	174.644	178.019
	AC5u0009GL000716	352.54	319.88	386.028	377.779	518.106	529.164	486.267	523.027
	AC5u0009GL000717	299.642	322.782	411.691	421.279	427.746	438.173	476.78	452.888
	AC5u0009GL000718	382.789	407.975	369.127	379.194	423.819	427.706	440.16	442.848
	AC5u0009GL000719	435.433	453.656	366.717	368.304	473.43	495.462	430.66	432.779
	AC5u0009GL000720	247.809	249.794	195.212	191.289	332.662	348.438	280.132	270.964
	AC5u0009GL000721	662.041	818.463	368.772	358.492	80.9972	78.3355	78.5586	80.6236
	AC5u0009GL000722	623.025	767.876	371.913	354.837	84.5094	79.5865	87.5855	84.6623
	AC5u0009GL000723	52.4588	57.073	54.6147	51.4547	59.2587	59.9066	58.9729	55.547
	AC5u0009GL000724	201.266	253.766	206.366	195.794	149.96	165.956	169.304	166.583
	AC5u0009GL000725	316.646	314.765	311.986	323.84	235.822	241.139	252.592	246.515
	AC5u0009GL000726	192.744	158.955	295.114	284.181	347.42	334.687	342.342	318.436
	AC5u0009GL000727	132.504	117.528	226.692	218.164	263.18	255.744	265.73	251.431
	AC5u0009GL000728	173.7	168.074	276.384	264.238	385.432	367.716	351.978	318.127
	AC5u0009GL000729	181.252	155.403	306.497	286.016	361.524	359.892	386.843	381.793
	AC5u0009GL000730	658.13	563.027	549.782	570.576	739.575	731.825	596.828	597.722
	AC5u0009GL000731	716.533	597.667	599.434	620.612	841.357	835.133	641.565	622.243
	AC5u0009GL000732	814.104	683.077	680.537	685.849	962.119	992.177	716.447	727.703
	AC5u0009GL000733	150.89	132.775	129.712	140.586	203.846	217.654	202.392	200.998
	AC5u0009GL000734	142.433	175.395	130.938	126.573	193.604	202.233	175.073	177.277
	AC5u0009GL000735	187.56	265.185	189.74	187.974	252.305	237.74	229.444	210.86
	AC5u0009GL000736	164.253	177.803	175.209	173.737	186.533	187.674	221.352	210.613
	AC5u0009GL000737	151.625	149.809	148.359	146.297	157.319	160.924	197.447	179.347
	AC5u0009GL000738	96.8074	98.3348	84.202	85.9765	78.8766	90.2505	110.884	103.119
	AC5u0009GL000739	865.559	1270.93	895.56	836.433	828.061	781.599	925.56	1050.69
	AC5u0009GL000740	1144.48	1325.21	781.791	740.31	1514.23	1515.21	1211.96	1175.97
	AC5u0009GL000741	9771.32	10037.5	9133.81	9321.19	11935.9	12507.3	10441.7	10194.4
	AC5u0009GL000742	7014.56	7143.98	6816.19	6563.81	8311.48	8444.51	7839.83	8322.57
	AC5u0009GL000743	139.572	110.897	587.43	578.765	318.532	354.942	830.807	809.281
	AC5u0009GL000744	1.2293	2.59373	6.99352	3.02117	4.52089	4.30379	7.7351	2.58387
	AC5u0009GL000745	4.62611	7.55173	6.15627	5.17003	9.56823	7.95595	10.0992	10.5863
	AC5u0009GL000746	33.7443	35.3266	41.5415	39.4807	44.0981	44.9746	50.0492	52.3567
	AC5u0009GL000747	7317.86	7857.66	5721.29	5774	8356.97	8517.25	7451.4	8349.08
	AC5u0009GL000748	3074.49	3563.6	3041.04	3015.03	3459.2	3991.94	3309.49	3118.03
	AC5u0009GL000749	225.35	367.2	288.391	335.302	124.511	134.21	257.652	194.257
	AC5u0009GL000750	277.708	330.504	254.502	217.086	321.098	315.496	365.147	389.278
	AC5u0009GL000751	11.4624	7.7549	30.5573	24.8634	13.615	15.9938	24.3342	23.6439
	AC5u0009GL000752	9.96547	7.29487	32.4822	30.3894	16.9533	19.6202	24.5703	19.6233
	AC5u0009GL000753	11.9182	12.1581	28.7133	30.2854	22.506	21.4533	22.6959	21.5398
	AC5u0009GL000754	4803.85	2973.74	12561.5	12895.2	5172.34	4940.58	4239.72	4141.73
	AC5u0009GL000755	1058.09	848.264	1314.42	1302.51	2286.44	2295.66	1398.95	1488.31
	AC5u0009GL000756	693.545	433.154	947.223	951.612	1802.04	1872.8	925.202	962.93
	AC5u0009GL000757	1188.43	740.186	2673.57	2448.96	2128.13	2815.22	1672.64	2587.93
	AC5u0009GL000758	85.9702	99.5685	101.427	99.9372	89.568	97.5903	102.836	108.115
	AC5u0009GL000759	163.108	160.392	236.774	244.604	265.294	258.465	265.223	261.292
	AC5u0009GL000760	336.435	295.749	405.559	394.136	451.018	463.06	468.053	432.031
	AC5u0009GL000761	298.954	281.27	355.243	356.25	398.855	413.838	400.794	415.1
	AC5u0009GL000762	386.73	396.911	390.542	409.988	473.585	492.149	464.33	489.113
	AC5u0009GL000763	258.239	267.797	270.836	283.976	331.507	334.021	322.055	298.603
	AC5u0009GL000764	289.142	289.228	319.565	335.35	347.813	353.419	373.218	374.662
	AC5u0009GL000765	233.794	250.227	276.586	276.008	286.329	285.588	300.872	288.13
	AC5u0009GL000766	200.589	238.922	232.37	236.697	286.282	264.573	286.913	264.776
	AC5u0009GL000767	179.307	203.247	206.841	192.639	241.453	229.691	236.79	229.1
	AC5u0009GL000768	157.228	201.636	163.465	153.442	214.092	205.344	209.794	207.633
	AC5u0009GL000769	115.556	116.077	164.56	163.286	98.5584	107.268	124.464	113.494
	AC5u0009GL000770	146.561	123.233	176.708	195.55	118.563	124.518	141.242	135.217
	AC5u0009GL000771	156.65	131.533	166.366	171.452	116.7	137.034	139.275	130.219
	AC5u0009GL000772	1054.59	962.131	909.632	863.177	1188.25	1174.81	1124.51	1142.28
	AC5u0009GL000773	344.117	306.511	365.184	362.757	431.584	470.493	432.466	457.731
	AC5u0009GL000774	306.188	270.299	290.231	295.108	403.49	423.923	363.209	349.709
	AC5u0009GL000775	315.187	269.783	262.969	278.308	383.731	405.029	341.563	347.664
	AC5u0009GL000776	91.7687	76.2851	97.1775	102.123	126.502	120.606	130.004	122.455
	AC5u0009GL000777	82.3446	67.4292	81.0996	83.8648	119.123	114.102	121.652	111.511
	AC5u0009GL000778	55.6866	41.5502	56.5066	59.8606	97.4656	90.576	94.8152	84.9479
	AC5u0009GL000779	12.4311	8.96148	43.1529	38.9528	31.2399	32.4598	55.0148	61.6522
	AC5u0009GL000780	12.1184	10.0581	54.968	53.5228	37.9065	42.2228	64.6584	64.3032
	AC5u0009GL000781	19.413	15.8131	72.9759	79.7139	51.7626	55.2342	97.3325	95.7432
	AC5u0009GL000782	39.4571	67.2096	46.0711	47.0358	36.7762	38.3976	47.3124	35.8191
	AC5u0009GL000783	67.2094	70.9034	25.2453	27.7941	27.9764	26.8484	20.4619	20.414
	AC5u0009GL000784	63.4407	69.2433	27.2895	24.0974	29.9855	28.9481	25.3417	20.7413
	AC5u0009GL000785	12484.9	16001.7	12985.6	12303.8	7861.82	7861.65	9057.98	9301.31
	AC5u0009GL000786	799.626	930.355	542.486	543.932	790.359	801.492	704.817	697.899
	AC5u0009GL000787	321.539	339.211	241.747	234.519	319.692	362.201	327.73	319.116
	AC5u0009GL000788	256.077	298.016	183.291	187.068	260.257	264.431	248.485	246.366
	AC5u0009GL000789	268.381	310.64	224.558	243.016	281.395	260.749	264.395	254.004
	AC5u0009GL000790	182.691	192.486	183.8	177.767	194.404	189.602	224.526	226.686
	AC5u0009GL000791	217.134	221.097	224.915	219.119	205.952	196.311	256.805	235.932
	AC5u0009GL000792	176.779	193.895	191.562	196.885	181.327	168.058	228.925	213.952
	AC5u0009GL000793	223.314	232.79	217.129	208.862	228.388	245.754	280.64	266.407
	AC5u0009GL000794	2527.83	2643.75	1616.48	1569.65	1573.64	1544.6	1379.12	1520.83
	AC5u0009GL000795	115.548	108.738	142.44	148.938	27.4021	28.3918	39.7805	37.8315
	AC5u0009GL000796	98.3688	85.5382	129.331	135.651	21.1233	20.3692	31.1306	27.1932
	AC5u0009GL000797	99.2328	91.8935	134.847	138.591	18.3812	22.2215	32.8857	26.5894
	AC5u0009GL000798	312.745	300.192	329.269	348.843	165.64	188.17	216.996	221.279
	AC5u0009GL000799	22.021	18.5551	88.4502	90.6352	32.7516	35.8373	76.9702	77.1755
	AC5u0009GL000800	1.12512	1.58261	2.25215	2.07386	1.77333	1.14889	5.71086	1.23876
	AC5u0009GL000801	61.2923	51.7115	66.7282	60.8972	52.8807	53.7655	69.5335	66.2459
	AC5u0009GL000802	676.978	572.552	693.697	687.377	1134.46	1161.38	1183.25	1205.47
	AC5u0009GL000803	76.0305	52.6052	162.936	157.08	126.076	130.174	190.414	192.933
	AC5u0009GL000804	173.402	129.865	271.095	277.284	114.655	129.291	194.771	201.7
	AC5u0009GL000805	92.5062	133.869	101.547	100.629	110.781	109.18	101.357	94.0033
	AC5u0009GL000806	132.011	165.987	127.348	135.156	153.866	154.21	138.051	131.441
	AC5u0009GL000807	105.306	82.9429	121.462	111.906	190.413	212.049	178.18	186.193
	AC5u0009GL000808	109.198	93.0218	82.5494	88.5518	130.344	131.009	112.04	113.71
	AC5u0009GL000809	128.208	102.749	102.352	100.25	165.764	156.192	124.589	122.737
	AC5u0009GL000810	122.925	99.2473	93.2656	96.2494	148.739	143.66	120.298	121.353
	AC5u0009GL000811	115.004	99.0566	104.903	100.891	136.901	147.376	123.843	88.7357
	AC5u0009GL000812	176.328	249.02	138.281	127.301	176.029	228.883	218.341	312.582
	AC5u0009GL000815	0.41908	0.442113	0	0	0	0.244533	1.05479	0
	AC5u0009GL000846	52.1081	45.0718	80.3943	72.7105	59.2934	57.3518	76.9504	69.1121
	AC5u0009GL000849	19.7042	16.0745	36.8243	36.3343	26.7481	26.5654	51.3802	49.2439
	AC5u0009GL000850	437.043	511.49	583.246	548.695	166.477	271.076	356.596	652.814
	AC5u0009GL000851	402.631	458.913	731.936	752.375	214.669	251.625	449.339	586.279
	AC5u0009GL000852	74.5263	55.522	109.436	115.623	73.1954	70.3849	90.694	84.7449
	AC5u0009GL000853	283.441	233.576	451.842	442.52	162.074	156.133	292.253	256.589
	AC5u0009GL000854	379.935	332.518	521.44	537.835	243.841	242.443	366.899	325.459
	AC5u0009GL000855	305.839	281.151	384.787	410.198	241.794	212.323	310.532	261.141
	AC5u0009GL000856	146.594	122.554	163.037	166.202	99.9036	76.6613	126.005	98.4179
	AC5u0009GL000857	92.8071	101.405	99.7011	87.0772	103.401	88.8323	106.898	93.2117
	AC5u0009GL000858	87.0811	90.1036	105.095	92.1292	83.8884	80.1049	91.8522	94.1877
	AC5u0009GL000859	753.586	598.451	464.353	440.284	824.682	724.661	631.299	674.02
	AC5u0009GL000860	63.0312	82.4881	141.552	168.111	61.4791	58.9702	138.696	107.65
	AC5u0009GL000861	47.2209	40.9856	94.5506	102.77	31.6441	38.9677	85.3711	70.158
	AC5u0009GL000862	51.9264	44.3197	135.252	127.873	33.0385	40.5003	93.5217	68.0095
	AC5u0009GL000863	14.2841	10.4115	21.2597	19.0206	15.3501	20.3824	21.1135	19.9639
	AC5u0009GL000864	15.8938	14.372	24.7905	23.5381	23.4238	29.3878	30.1322	28.5108
	AC5u0009GL000865	14.2984	16.8153	23.7069	23.2733	25.1221	25.7133	34.9259	19.9891
	AC5u0009GL000866	184.592	163.051	239.375	235.019	203.909	201.844	271.97	257.443
	AC5u0009GL000867	81.3765	56.3624	96.0689	93.879	167.29	173.228	145.143	152.818
	AC5u0009GL000868	70.1615	59.2079	134.444	134.165	155.837	171.757	158.346	170.509
	AC5u0009GL000869	34.3968	25.011	32.1497	37.1505	43.5943	41.3826	55.5397	43.3823
	AC5u0009GL000870	119.351	91.728	166.096	165.601	92.9815	98.3347	159.199	168.323
	AC5u0009GL000871	34.4912	30.2991	37.9445	34.1675	34.743	34.2136	39.0984	36.4079
	AC5u0009GL000872	39.5132	34.548	43.6717	47.0244	37.6182	37.1691	39.901	36.4571
	AC5u0009GL000873	17.4673	12.7055	20.3011	19.7969	23.5189	23.0424	32.4819	31.2138
	AC5u0009GL000874	25.8235	22.7238	33.2657	23.7015	32.2778	29.9932	43.1249	40.8651
	AC5u0009GL000875	23.0494	21.1551	26.08	20.5062	25.0667	29.8575	36.7804	30.5912
	AC5u0009GL000876	191.82	128.969	223.686	228.318	197.339	191.699	204.809	205.921
	AC5u0009GL000877	26.1699	23.9608	35.9091	38.8511	21.4618	20.4223	39.6275	30.0908
	AC5u0009GL000878	22.1179	20.6625	37.2928	37.7099	19.3	17.7838	26.644	27.627
	AC5u0009GL000879	119.075	102.192	125.93	121.549	192.814	187.094	176.585	181.18
	AC5u0009GL000880	92.8423	92.9458	122.142	123.593	79.4656	79.5674	113.235	111.047
	AC5u0009GL000881	20.9087	17.2052	15.5202	17.6768	55.2697	48.1388	33.981	33.4724
	AC5u0009GL000882	223.458	263.095	134.924	133.538	165.199	175.302	139.232	159.987
	AC5u0009GL000883	64.5714	70.7445	177.731	182.118	60.8439	50.8559	128.915	119.142
	AC5u0009GL000884	73.1492	70.0124	153.946	148.265	77.3182	73.1847	111.473	115.125
	AC5u0009GL000885	49.9636	45.4885	104.255	103.635	64.0949	61.079	96.1027	85.0106
	AC5u0009GL000886	356.088	281.641	404.578	412.25	557.027	574.84	532.884	536.472
	AC5u0009GL000887	1120.08	1427.25	1300.6	1266.11	1477.85	1474.34	1409.46	1462.35
	AC5u0009GL000888	4514.44	3232.55	4282.31	4173.81	5969.95	6045.51	5534.55	5318.16
	AC5u0009GL000889	13.9943	15.1108	19.8566	18.2565	19.0293	24.0551	42.8635	37.2553
	AC5u0009GL000890	10.2172	8.90173	12.7806	13.3833	16.3443	17.8381	30.9947	30.9871
	AC5u0009GL000891	9.05081	8.63162	15.1954	13.2394	19.4767	17.7447	39.1453	30.6992
	AC5u0009GL000892	5.27604	5.39736	7.68075	7.26915	9.86962	6.81019	36.0956	25.492
	AC5u0009GL000893	3.13662	2.85778	4.21774	4.98961	8.32936	6.15619	26.0665	18.1518
	AC5u0009GL000894	3.90878	3.10253	5.27103	4.77573	7.80356	7.38537	24.1547	18.332
	AC5u0009GL000895	5.06437	3.8358	10.6709	6.95721	10.2334	9.24405	33.3372	24.565
	AC5u0009GL000896	5.66515	4.04294	12.4283	7.69853	8.22864	11.4725	51.3312	32.0205
	AC5u0009GL000897	6.85719	4.13376	5.46369	6.6277	9.38489	9.88527	42.8718	33.8441
	AC5u0009GL000898	240.034	164.776	182.164	185.141	357.029	347.479	322.07	324.907
	AC5u0009GL000899	11.875	8.63712	17.2973	16.6406	14.2989	16.0531	25.5444	18.8697
	AC5u0009GL000900	6.91482	5.76384	11.9796	15.4415	8.61122	14.5452	20.8848	17.7385
	AC5u0009GL000901	57.7279	36.4489	203.714	208.24	91.4923	97.9599	170.862	167.958
	AC5u0009GL000902	44.3231	28.8192	169.615	170.797	78.5415	86.4743	163.984	134.608
	AC5u0009GL000903	18.2451	13.5936	74.5344	72.0713	37.4082	39.1489	64.9189	59.5714
	AC5u0009GL000904	19.6129	17.5077	80.1076	77.4931	40.0275	46.657	69.4893	57.5332
	AC5u0009GL000905	17.5175	17.5077	58.9787	51.1182	42.0443	49.2784	62.7471	66.664
	AC5u0009GL000906	52.0202	98.1602	72.203	79.1825	59.2202	61.248	92.9765	95.0072
	AC5u0009GL000907	63.962	124.43	68.9674	77.8815	62.3554	64.3839	96.9152	86.8795
	AC5u0009GL000908	500.613	428.712	586.654	587.763	796.265	766.613	762.005	699.625
	AC5u0009GL000909	150.001	160.233	287.241	264.97	255.206	239.094	253.967	263.122
	AC5u0009GL000910	422.265	374.227	524.556	498.558	519.741	503.543	553.778	548.823
	AC5u0009GL000911	218.458	149.198	186.942	194.025	4635.33	4172.97	2725.86	2579.46
	AC5u0009GL000912	289.416	225.809	327.265	328.82	3225.98	2783.79	2048.92	1973.34
	AC5u0009GL000913	1099.21	1392.66	1014.67	984.659	600.667	616.337	717.969	759.21
	AC5u0009GL000914	116.456	194.65	79.0234	83.1196	98.4109	99.1523	106.492	103.693
	AC5u0009GL000915	159.66	228.781	101.841	108.604	128.352	136.398	138.04	127.65
	AC5u0009GL000916	155.472	217.199	102.929	109.274	124.767	118.007	127.554	123.865
	AC5u0009GL000917	167.892	282.165	97.9093	101.149	130.783	118.785	120.575	110.627
	AC5u0009GL000918	392.946	668.939	161.201	165.908	229.5	227.294	185.642	182.108
	AC5u0009GL000919	52.9529	71.8928	59.583	59.9265	57.4565	63.1765	58.9903	49.3947
	AC5u0009GL000920	80.2591	92.5263	69.7858	80.9907	96.2552	80.2822	81.397	69.4239
	AC5u0009GL000921	77.2978	95.6148	89.9167	81.5717	78.366	69.7444	84.7822	85.7227
	AC5u0009GL000922	38.6601	38.1323	44.5042	53.7631	30.7142	35.5796	54.7434	65.3099
	AC5u0009GL000923	40.618	54.7942	39.3276	38.6284	56.9544	57.4832	50.4671	51.7565
	AC5u0009GL000924	74.813	77.5941	92.3192	94.0847	84.2727	92.7135	86.4946	86.2485
	AC5u0009GL000925	376.73	625.989	824.38	833.585	630.19	681.338	889.549	843.142
	AC5u0009GL000926	69.3247	130.19	45.0115	49.6372	86.5084	85.5035	77.1996	73.0161
	AC5u0009GL000927	409.719	406.876	598.861	570.239	110.548	102.416	105.66	116.119
	AC5u0009GL000928	950.451	779.066	1075.49	1101.88	620.576	674.276	824.086	823.512
	AC5u0009GL000929	1514.63	2046.51	2231.37	2277.49	564.91	580.339	723.425	893.513
	AC5u0009GL000930	142.463	144.108	108.063	116.451	141.167	137.473	116.625	113.605
	AC5u0009GL000931	142.851	141.704	117.257	124.881	108.594	113.071	108.634	112.694
	AC5u0009GL000932	138.079	130.895	108.257	121.759	101.903	103.687	104.818	100.604
	AC5u0009GL000933	104.086	131.524	76.6598	73.8658	65.1659	61.0938	68.2254	62.6541
	AC5u0009GL000934	170.985	233.436	163.21	174.917	148.999	140.62	171.009	138.766
	AC5u0009GL000935	113.303	170.038	148.367	135.298	138.486	130.54	143.761	156.967
	AC5u0009GL000936	994.281	1433.71	1146.38	1039.75	810.085	799.802	856.627	918.238
	AC5u0009GL000937	117.552	105.548	108.181	108.125	55.6281	44.3828	56.1278	46.4578
	AC5u0009GL000938	131.496	109.302	127.893	122.132	133.352	115.293	116.924	107.464
	AC5u0009GL000939	28.3467	27.1318	57.4103	55.8519	30.9749	31.193	46.7363	41.0894
	AC5u0009GL000940	21.4315	21.2214	33.6369	32.0193	66.4514	66.1946	56.1637	51.7985
	AC5u0009GL000941	202.446	360.7	306.704	337.589	186.107	237.421	269.741	309.198
	AC5u0009GL000942	437.386	459.274	481.087	458.668	159.511	168.011	194.796	200.093
	AC5u0009GL000943	75.5171	94.6413	73.8461	74.5951	75.334	73.0512	62.8375	70.8137
	AC5u0009GL000944	198.822	193.742	177.245	184.114	154.021	163.548	151.746	155.212
	AC5u0009GL000945	39.5496	60.4719	42.966	41.3484	69.9179	68.9719	55.1486	55.9415
	AC5u0009GL000946	208.529	205.496	334.63	315.416	428.756	434.739	453.762	439.367
	AC5u0009GL000947	133.855	159.529	128.512	134.96	156.876	158.447	154.07	160.771
	AC5u0009GL000948	103.758	132.453	113.507	111.538	131.087	120.748	133.546	125.667
	AC5u0009GL000949	237.093	322.173	233.277	238.01	394.041	373.413	320.519	327.775
	AC5u0009GL000950	638.598	684.157	649.43	658.815	1133.36	1235.31	1041.96	1013.35
	AC5u0009GL000951	534.021	561.653	553.925	542.063	988.657	1018.85	895.757	831.124
	AC5u0009GL000952	346.07	390.102	659.806	642.215	180.432	216.534	388.357	356.931
	AC5u0009GL000953	24.5688	19.7247	38.3862	32.8109	49.5205	53.1061	49.859	52.4302
	AC5u0009GL000954	28.1187	26.7398	42.4413	41.2526	68.441	70.294	60.1642	57.0979
	AC5u0009GL000955	784.197	828.291	533.515	559.337	355.375	350.813	343.507	346.071
	AC5u0009GL000956	11202.9	29390.9	5803.19	5700.21	1794.27	2033.28	2380.41	2427.33
	AC5u0009GL000957	6707.54	17847.2	3540.68	3566.82	1101.62	1171.44	1347.23	1328.26
	AC5u0009GL000958	449.009	499.818	419.817	417.241	467.053	458.376	502.64	464.201
	AC5u0009GL000959	463.737	522.553	460.354	471.157	438.343	440.941	524.035	462.202
	AC5u0009GL000960	246.384	389.821	339.444	330.484	236.186	236.659	308.363	326.778
	AC5u0009GL000961	274.776	255.52	247.661	247.65	403.176	402.116	356.915	352.711
	AC5u0009GL000962	449.726	397.062	342.373	325.77	616.022	651.289	536.835	550.674
	AC5u0009GL000963	60.5642	70.4332	45.4579	47.9116	123.718	116.703	85.2194	87.1199
	AC5u0009GL000964	503.367	501.665	680.418	666.46	867.063	830.142	805.831	805.912
	AC5u0009GL000965	311.301	352.569	279.173	272.303	337.054	348.251	299.484	292.466
	AC5u0009GL000966	55.214	48.5834	54.3011	57.4974	35.8344	39.0675	40.4719	37.991
	AC5u0009GL000967	1194.05	932.137	1199.77	1177.41	1780.3	1716.43	1903.09	1832.84
	AC5u0009GL000968	12.6554	23.6739	12.3706	11.0301	16.4507	12.485	14.8426	13.6332
	AC5u0009GL000969	41.3284	43.1201	42.881	45.7296	104.053	110.352	86.8246	88.2901
	AC5u0009GL000970	316.053	469.011	291.397	280.607	402.23	460.29	423.265	645.378
	AC5u0009GL000971	240.774	312.672	185.372	197.103	200.096	218.386	200.692	187.095
	AC5u0009GL000972	375.383	457.776	265.222	266.057	299.036	305.417	290.599	293.233
	AC5u0009GL000973	307.403	373.516	165.432	180.18	210.43	218.901	211.932	217.725
	AC5u0009GL000974	349.641	381.503	416.653	433.236	266.41	271.801	333.585	357.086
	AC5u0009GL000975	486.021	375.59	398.023	392.844	167.427	163.778	199.041	170.656
	AC5u0009GL000976	1165.43	825.554	1379.34	1333.84	329.975	346.174	414.097	419.354
	AC5u0009GL000977	197.159	211.46	228.71	227.211	157.757	177.733	203.017	222.167
	AC5u0009GL000978	197.113	206.659	219.473	211.447	158.564	162.341	196.644	205.874
	AC5u0009GL000979	143.887	118.891	206.582	198.433	163.659	167.23	184.754	176.002
	AC5u0009GL000980	118.824	93.4078	197.145	191.35	147.903	149.891	164.518	152.837
	AC5u0009GL000981	537.968	438.082	547.027	543.22	687.837	701.435	714.459	730.256
	AC5u0009GL000982	924.655	988.17	198.509	215.803	427.828	395.935	209.526	218.958
	AC5u0009GL000983	1081.23	1191.61	228.879	251.41	556.928	505.818	268.127	300.627
	AC5u0009GL000984	632.675	673.29	150.779	158.481	356.631	333.389	187.532	185.106
	AC5u0009GL000985	274.088	342.571	350.227	332.014	326.843	326.279	400.977	405.914
	AC5u0009GL000986	271.43	311.345	311.037	301.407	315.381	311.917	337.126	348.602
	AC5u0009GL000987	399.682	451.346	446.882	444.884	479.023	495.709	497.415	497.143
	AC5u0009GL000988	424.936	342.678	429.203	413.122	507.834	528.659	478.71	480.914
	AC5u0009GL000989	175.796	180.969	192.322	171.51	194.498	192.584	219.424	238.139
	AC5u0009GL000990	100.054	104.075	119.801	112.194	110.037	120.473	138.538	129.387
	AC5u0009GL000991	145.393	139.754	152.178	159.118	174.855	174.877	188.787	173.1
	AC5u0009GL000992	128.734	129.897	169.378	158.746	155.848	161.092	178.362	175.616
	AC5u0009GL000993	1381.52	3471.34	987.183	1045.62	644.155	606.947	480.176	479.146
	AC5u0009GL000994	136.683	226.931	175.931	173.566	152.277	145.589	179.609	169.221
	AC5u0009GL000995	125.721	207.257	150.868	144.779	129.23	124.33	165.366	148.156
	AC5u0009GL000996	2.76593	2.00609	4.53486	5.1832	3.22416	3.58089	5.04715	3.47785
	AC5u0009GL000997	3.85416	2.87011	4.10822	5.94329	4.44678	4.05685	6.46705	3.99381
	AC5u0009GL000998	4.76884	5.19864	13.6655	10.9387	9.5206	8.34787	8.16186	8.40077
	AC5u0009GL000999	4.86598	2.97198	7.12303	6.04234	6.45842	6.87411	12.3762	6.15208
	AC5u0009GL001000	2.79638	2.98659	5.88044	6.82486	3.70923	3.58649	5.96508	4.18175
	AC5u0009GL001001	2.38875	3.18321	3.81465	4.20218	2.77418	4.69504	5.94899	4.37916
	AC5u0009GL001002	0.954952	1.50753	2.37113	2.63396	1.32104	1.25073	3.00182	1.65859
	AC5u0009GL001003	0.601288	0.634336	2.09046	1.47775	1.42155	1.57884	1.36205	1.4444
	AC5u0009GL001004	0.908516	0.851955	4.08381	1.29006	0.106069	0.589022	2.13421	0.848718
	AC5u0009GL001005	0.758943	0.889618	0.959477	1.24347	0.70885	0.787279	2.54692	1.01284
	AC5u0009GL001006	2.02385	1.18616	2.70075	1.21584	0.945134	1.83698	3.05631	3.2411
	AC5u0009GL001007	1.11529	1.96099	4.04196	3.65464	1.87502	2.68987	4.26678	2.85774
	AC5u0009GL001008	1.32283	2.02988	4.10489	4.84701	1.01088	0.982387	3.87428	0.577761
	AC5u0009GL001009	1.33835	0.313758	5.82794	3.36227	1.71877	1.21478	4.04221	1.25026
	AC5u0009GL001010	0.632212	0.625274	1.84829	0.932248	0.705813	0.737792	1.79012	0.996637
	AC5u0009GL001011	1.36029	0.956704	1.14648	0.445747	1.78665	1.05831	3.42373	0
	AC5u0009GL001012	0.573579	0.874039	1.3697	1.25302	1.40627	0.892491	5.90291	0.612373
	AC5u0009GL001013	0.896004	0.904152	1.72376	1.03401	1.35081	0.818326	3.13762	1.26334
	AC5u0009GL001014	3.74553	1.51976	4.00671	5.94793	2.42191	1.0087	6.96159	3.46055
	AC5u0009GL001015	1.0275	1.37694	2.31713	2.45698	1.07964	1.42595	3.21519	0.900576
	AC5u0009GL001016	0.982988	1.7522	1.88551	2.06595	1.46027	1.85917	2.66178	1.95419
	AC5u0009GL001017	3.27671	3.76181	3.65515	4.35807	4.65816	5.28601	7.13138	3.93562
	AC5u0009GL001018	8.00663	8.25472	6.9015	5.18767	2.29444	7.00782	8.24399	9.83524
	AC5u0009GL001019	4.39379	5.1672	7.55811	5.16904	5.29792	5.29568	11.4576	10.1221
	AC5u0009GL001020	5.53185	6.12769	9.09158	7.06954	6.68446	7.42404	21.7202	17.9395
	AC5u0009GL001021	2.97869	2.02012	1.34491	1.88242	1.56492	0	1.49942	2.04438
	AC5u0009GL001022	1.76548	2.17294	1.11599	0.867784	1.85508	1.37355	3.85109	2.82734
	AC5u0009GL001023	47.6285	57.0504	59.5861	60.1118	41.6394	55.7273	70.927	110.613
	AC5u0009GL001102	127.601	182.08	223.793	235.651	202.084	221.789	240.036	256.247
	AC5u0009GL001103	31.5085	40.0565	26.695	26.9203	46.8588	51.177	47.2225	46.8268
	AC5u0009GL001104	84.0562	83.8575	125.033	134.893	108.986	115.195	140.573	132.809
	AC5u0009GL001105	77.822	74.8364	106.897	112.34	95.251	95.6319	112.362	116.129
	AC5u0009GL001106	53.6833	41.1568	67.2772	63.3834	64.7042	68.5916	78.459	70.1462
	AC5u0009GL001107	47.5132	57.4747	56.0939	55.9775	58.6762	59.2382	71.2508	65.3729
	AC5u0009GL001108	44.8882	53.3629	46.5745	43.4135	52.4475	53.5374	58.881	53.1819
	AC5u0009GL001109	294.412	308.148	414.295	433.326	295.189	290.097	367.594	359.314
	AC5u0009GL001110	340.887	357.4	456.2	472.638	322.867	321.395	386.852	350.968
	AC5u0009GL001111	400.777	423.102	565.013	576.967	399.021	366.92	463.443	435.944
	AC5u0009GL001112	84.329	81.7109	118.016	115.404	94.4126	87.3743	109.945	115.367
	AC5u0009GL001113	36.5088	35.3404	47.7861	49.3093	46.2295	43.3166	55.8009	57.7499
	AC5u0009GL001114	12.6233	11.09	17.8106	18.7623	16.6138	16.9437	16.0485	17.2316
	AC5u0009GL001115	297.833	188.251	443.513	477.412	351.606	367.048	323.699	326.676
	AC5u0009GL001116	257.478	163.832	378.686	391.882	305.392	315.794	278.109	270.266
	AC5u0009GL001117	248.041	148.533	388.667	399.204	228.565	244.344	253.791	239.514
	AC5u0009GL001118	350.46	229.938	687.571	720.403	292.826	317.068	356.77	359.442
	AC5u0009GL001119	163.154	275.781	83.523	87.3803	57.5905	53.2326	62.3851	56.3476
	AC5u0009GL001120	161.91	283.259	81.829	86.1497	58.3729	56.0481	63.6962	57.6852
	AC5u0009GL001121	801.769	976.333	1137.42	1110.49	646.282	700.099	854.658	884.39
	AC5u0009GL001122	133.739	205.594	209.205	212.655	99.9713	103.587	152.916	143.784
	AC5u0009GL001123	83.6787	169.303	89.8048	90.7942	51.3841	46.6873	65.4362	53.7174
	AC5u0009GL001124	34.9896	28.7725	51.7761	55.694	35.5178	36.3998	50.9421	46.9446
	AC5u0009GL001125	18.9899	21.3402	27.4	29.0168	24.7251	34.6873	29.5088	36.6921
	AC5u0009GL001126	148.809	157.937	146.907	133.024	168.411	164.344	189.717	178.125
	AC5u0009GL001127	90.801	93.4447	66.9353	68.9969	133.198	137.291	120.195	121.485
	AC5u0009GL001128	598.287	532.555	659.604	633.429	757.622	749.09	764.524	806.429
	AC5u0009GL001129	262.447	184.452	200.532	197.493	432.6	442.601	374.099	385.013
	AC5u0009GL001130	120.401	73.4183	137.094	134.83	57.1746	61.0242	69.9147	70.2387
	AC5u0009GL001131	23.7668	21.4337	32.4975	33.3579	19.5838	19.6307	24.4808	21.9458
	AC5u0009GL001132	582.771	565.25	284.721	270.937	47.0585	44.4703	52.158	44.175
	AC5u0009GL001133	507.158	535.258	204.216	195.58	44.72	38.6204	38.377	36.637
	AC5u0009GL001134	154.719	370.784	92.1998	91.7681	140.092	137.183	116.607	108.748
	AC5u0009GL001135	159.665	324.166	81.5911	77.7952	129.774	126.256	103.989	102.951
	AC5u0009GL001136	146.812	280.836	96.0464	96.2949	106.225	112.622	106.217	106.627
	AC5u0009GL001137	256.191	344.728	232.058	226.625	202.239	209.41	237.672	251.974
	AC5u0009GL001138	86.6566	144.819	110.07	106.284	92.629	96.9943	105.213	112.101
	AC5u0009GL001139	150.25	136.445	293.39	286.639	137.703	143.343	236.955	246.81
	AC5u0009GL001140	49.7208	34.3901	101.573	119.121	41.8644	44.9592	89.1746	50.6228
	AC5u0009GL001141	246.034	220.258	310.479	324.313	324.379	303.001	313.496	318.013
	AC5u0009GL001142	3249.96	3208.59	4162.92	4162.14	2042.4	2008.52	2870.68	3276.59
	AC5u0009GL001143	123.34	120.814	145.658	147.757	87.3649	89.0034	117.201	128.941
	AC5u0009GL001144	213.337	258.986	330.47	335.797	322.913	293.726	385.048	375.785
	AC5u0009GL001145	125.874	150.266	173.72	185.749	182.234	183.255	243.413	217.483
	AC5u0009GL001146	69.3596	86.066	88.2745	87.5586	99.187	106.953	129.481	130.599
	AC5u0009GL001147	14.1629	17.7538	23.1713	21.13	11.0299	16.5281	16.2717	23.415
	AC5u0009GL001148	546.09	398.49	422.5	426.655	537.663	547.891	493.123	493.841
	AC5u0009GL001149	621.064	396.458	532.31	505.566	610.574	603.571	473.494	481.545
	AC5u0009GL001150	317.377	353.126	261.043	254.093	436.078	452.346	396.166	435.491
	AC5u0009GL001151	262.094	244.449	225.767	225.331	385.458	372.503	350.46	362.969
	AC5u0009GL001152	267.463	226.369	266.082	259.638	393.427	366.095	360.317	343.892
	AC5u0009GL001153	102.652	115.562	153.066	161.194	147.234	151.526	171.124	172.374
	AC5u0009GL001154	57.4314	81.2567	60.7077	71.564	99.9036	84.5067	93.7881	93.204
	AC5u0009GL001155	68.4203	86.9625	79.5974	84.7916	102.102	89.4027	121.828	111.466
	AC5u0009GL001156	94.5258	125.364	133.925	132.84	97.1209	116.235	163.609	166.889
	AC5u0009GL001157	345.107	381.484	543.356	528.889	421.788	431.644	487.478	505.4
	AC5u0009GL001158	48.1703	63.3761	241.564	252.947	117.938	119.512	127.805	118.342
	AC5u0009GL001159	50.979	50.6576	369.262	366.235	142.8	145.395	164.873	150.908
	AC5u0009GL001160	373.158	357.652	299.548	299.571	251.963	248.183	318.48	318.332
	AC5u0009GL001161	335.256	370.751	267.971	276.437	414.383	409.493	427.887	411.357
	AC5u0009GL001162	204.603	235.434	189.568	191.265	250.916	244.188	268.641	243.471
	AC5u0009GL001163	45.8427	56.7378	56.013	53.1223	46.2853	40.348	61.6229	64.2893
	AC5u0009GL001164	42.5261	54.8939	51.3587	53.8713	56.6726	56.8907	53.4302	58.1372
	AC5u0009GL001165	64.7848	76.6546	91.9069	103.273	57.0378	63.3917	79.3695	78.4785
	AC5u0009GL001166	649.069	596.431	618.742	623.284	618.055	631.326	683.262	668.788
	AC5u0009GL001167	636.285	584.576	634.2	632.46	572.453	579.255	652.506	611.271
	AC5u0009GL001168	753.834	818.66	972.009	950.029	699.012	709.43	894.684	864.755
	AC5u0009GL001169	90.3968	109.423	131.129	142.963	110.499	100.029	145.323	134.096
	AC5u0009GL001170	67.9358	79.3435	102.462	117.193	78.3188	82.6349	111.476	113.092
	AC5u0009GL001171	245.004	256.066	292.291	293.38	266.575	278.035	295.05	297.607
	AC5u0009GL001172	24.6086	29.8231	29.3625	29.3898	29.2766	32.6582	35.9546	30.5831
	AC5u0009GL001173	28.4781	32.155	36.0028	32.3782	34.6078	33.0217	40.5787	37.5925
	AC5u0009GL001174	45.7667	74.1851	57.341	66.133	38.2374	40.4164	52.9789	55.6034
	AC5u0009GL001175	38.3231	58.1831	40.2338	43.2428	32.5644	30.7228	45.46	44.2283
	AC5u0009GL001176	349.634	815.188	450.305	450.658	551.764	554.352	520.624	539.045
	AC5u0009GL001177	34.4395	33.3804	45.7164	42.5844	47.2413	46.3139	47.5934	44.7905
	AC5u0009GL001178	23.6015	20.6178	28.8256	29.6057	38.8085	35.4032	41.575	34.0501
	AC5u0009GL001179	58.1916	53.1189	63.9329	66.9232	79.4112	75.6383	81.6761	81.7371
	AC5u0009GL001180	10.2305	7.30787	10.3469	9.57243	8.44429	12.4568	23.9995	20.1341
	AC5u0009GL001181	9.14642	6.16748	12.1989	16.2216	28.8317	44.1994	39.8393	28.6533
	AC5u0009GL001182	39.7618	26.5569	300.103	330.866	600.931	661.418	1760.77	1724.8
	AC5u0009GL001183	32.3072	27.0493	254.599	291.531	570.129	643.39	1681.18	1638.55
	AC5u0009GL001184	75.5798	55.1415	59.6664	55.4497	7.93201	5.63815	10.3056	7.61622
	AC5u0009GL001185	231.833	205.348	92.9155	98.3419	11.747	14.0131	14.5902	10.1454
	AC5u0009GL001186	171.086	178.219	186.022	187	239.846	232.212	247.352	229.361
	AC5u0009GL001187	10.2339	3.79333	38.1147	23.3839	16.8565	19.6898	23.1125	22.9227
	AC5u0009GL001188	565.304	409.34	618.332	626.083	601.482	573.608	540.205	508.593
	AC5u0009GL001189	608.039	454.171	661.492	700.206	600.842	608.955	571.351	561.853
	AC5u0009GL001190	670.359	528.139	641.448	670.584	576.959	607.478	583.162	538.056
	AC5u0009GL001191	12.1701	12.4499	25.4098	18.4896	8.33136	6.45568	16.3365	12.4026
	AC5u0009GL001192	7.41589	4.86324	10.2622	7.88132	9.89822	8.42046	11.0982	12.3978
	AC5u0009GL001194	212.891	209.375	304.777	322.685	273.912	261.386	268.993	254.035
	AC5u0009GL001195	312.691	333.841	401.99	390.623	358.595	364.149	339.967	332.082
	AC5u0009GL001196	88.0067	97.5992	74.0445	66.8007	227.219	234.43	176.957	183.785
	AC5u0009GL001197	156.491	175.707	152.649	147.787	297.243	301.712	256.723	243.862
	AC5u0009GL001198	172.903	131.262	179.923	183.441	192.683	199.418	182.582	181.684
	AC5u0009GL001199	206.824	161.796	239.73	222.23	239.676	240.019	224.11	241.173
	AC5u0009GL001200	632.031	488.281	501.289	468.112	155.633	161.106	224.213	239.331
	AC5u0009GL001201	177.65	122.94	237.574	240.117	246.714	255.735	226.866	223.144
	AC5u0009GL001202	303.258	219.418	334.021	325.398	395.198	397.151	361.457	372.165
	AC5u0009GL001203	27.8927	51.0948	18.2215	19.6759	35.9914	36.2962	36.1298	29.5066
	AC5u0009GL001204	25.4756	46.6487	17.2538	17.5308	29.5409	28.8807	35.8155	25.4623
	AC5u0009GL001205	20.8508	46.0138	14.525	18.8242	25.0388	29.7955	26.7753	21.7216
	AC5u0009GL001206	40.1059	59.5934	44.651	40.1235	81.4878	86.3655	71.9007	71.0424
	AC5u0009GL001207	130.339	143.017	154.236	148.855	97.339	102.386	99.0881	102.556
	AC5u0009GL001208	131.96	146.58	160.161	159.733	96.1796	106.173	103.283	105.83
	AC5u0009GL001209	90.7791	107.74	126.87	109.459	55.8901	79.4546	83.5391	86.0345
	AC5u0009GL001210	191.826	212.418	188.226	178.83	203.542	190.962	224.037	211.524
	AC5u0009GL001211	178.883	198.336	162.675	155.163	184.802	184.665	185.945	184.643
	AC5u0009GL001212	137.535	166.555	140.459	138.78	414.613	424.802	324.023	316.973
	AC5u0009GL001213	149.104	186.724	136.638	149.434	368.781	416.229	331.465	353.569
	AC5u0009GL001214	90.527	89.2561	65.9787	67.5814	174.688	172.719	128.204	127.78
	AC5u0009GL001215	603.409	594.34	687.543	640.767	701.205	778.788	854.81	897.702
	AC5u0009GL001216	45.3339	57.3776	34.7324	34.2016	47.5041	50.3717	43.7675	36.2752
	AC5u0009GL001217	32.7891	42.1551	27.1549	24.4774	29.977	31.8583	33.4941	31.0954
	AC5u0009GL001218	22.7782	25.2004	18.2318	13.8134	20.2818	20.4545	20.8475	21.7626
	AC5u0009GL001219	60.597	97.5062	58.9244	55.0038	60.3443	60.8608	61.06	62.0045
	AC5u0009GL001220	25.3219	31.0289	38.251	31.9138	35.3394	31.0661	44.7764	38.1342
	AC5u0009GL001221	407.909	506.55	181.538	176.675	849.546	892.483	535.001	570.117
	AC5u0009GL001222	217.423	209.772	136.459	139.103	331.742	342.63	307.414	308.073
	AC5u0009GL001223	27.8412	30.1393	24.8454	26.7433	32.3133	31.5352	51.9371	41.1987
	AC5u0009GL001224	343.344	366.559	508.352	482.904	441.304	518.894	617.075	627.66
	AC5u0009GL001225	100.921	153.746	56.3244	60.0601	52.6075	60.5731	63.3593	65.4963
	AC5u0009GL001226	117.936	186.251	64.1767	67.9224	50.2257	60.1378	66.7981	69.2768
	AC5u0009GL001227	1460.37	2806.24	615.326	621.933	1034.77	1331.85	1158.33	1717.59
	AC5u0009GL001228	667.062	938.343	511.205	483.061	758.777	780.862	624.599	671.608
	AC5u0009GL001229	58.0214	57.5035	50.7429	51.9012	55.1911	58.2484	46.3955	46.5314
	AC5u0009GL001230	136.68	150.382	65.6211	61.3259	161.418	191.295	123.983	140.723
	AC5u0009GL001231	180.033	181.685	69.2296	67.6716	209.696	258.879	171.511	165.883
	AC5u0009GL001232	512.479	659.841	335.161	296.531	215.778	259.953	239.409	281.44
	AC5u0009GL001233	110.189	86.4752	152.966	157.309	151.492	149.369	155.522	153.127
	AC5u0009GL001234	99.5534	77.3203	132.233	131.634	148.147	136.455	136.719	140.441
	AC5u0009GL001235	115.787	85.9285	136.253	143.172	147.92	162.505	144.705	151.901
	AC5u0009GL001236	104.23	81.1135	132.332	126.349	143.048	130.89	129.332	135.095
	AC5u0009GL001237	78.6473	85.1068	90.9511	94.4116	128.251	137.102	118.206	135.402
	AC5u0009GL001238	718.739	1018.31	444.806	442.253	663.563	642.518	578.745	554.403
	AC5u0009GL001239	34.9317	30.3114	56.9731	44.0674	40.0867	40.2089	52.572	48.8295
	AC5u0009GL001240	29.0515	18.8002	30.978	28.7417	35.6947	37.8026	42.4236	41.2479
	AC5u0009GL001241	55.3735	43.9432	74.4887	72.7334	120.816	113.937	117.364	123.11
	AC5u0009GL001242	83.6038	56.978	95.5494	96.3978	176.709	170.757	161.921	172.737
	AC5u0009GL001243	87.4164	167.092	43.3551	39.9132	71.6262	81.5139	65.1003	57.8566
	AC5u0009GL001244	60.9358	50.6133	61.0733	61.0232	60.0211	63.9844	58.2097	57.51
	AC5u0009GL001245	611.472	696.564	1191.19	1250.69	274.5	293.463	600.519	540.411
	AC5u0009GL001246	329.915	399.337	587.24	613.75	163.441	176.2	312.913	296.936
	AC5u0009GL001247	15.5614	15.2944	18.5472	15.8085	22.382	21.798	23.6121	20.117
	AC5u0009GL001248	13.5673	12.771	13.8354	15.4743	22.1319	19.1571	19.2057	17.871
	AC5u0009GL001249	21.8508	17.7995	21.6799	25.5591	31.3879	25.5	33.4156	34.5501
	AC5u0009GL001250	21.9298	13.3392	18.7327	15.7317	25.7414	24.6699	23.6694	29.8991
	AC5u0009GL001251	23.404	13.8415	25.5533	24.0532	24.9643	28.554	22.8483	38.3322
	AC5u0009GL001252	33.25	27.7826	24.9237	28.0583	44.0581	42.58	41.6214	46.4744
	AC5u0009GL001253	51.7228	43.7692	42.6605	41.8735	69.4603	65.5252	71.0082	60.1305
	AC5u0009GL001254	24.6364	18.8949	63.9162	54.9754	37.7976	37.7464	59.5729	60.9056
	AC5u0009GL001255	31.2405	23.3516	56.8344	53.8942	39.351	33.1676	55.0023	49.054
	AC5u0009GL001256	207.107	220.483	233.771	215.402	241.576	239.805	267.665	276.952
	AC5u0009GL001257	917.072	968.235	753.32	738.86	856.347	951.374	878.609	962.264
	AC5u0009GL001258	100.14	100.323	86.6305	86.4246	157.917	166.176	132.378	128.261
	AC5u0009GL001259	207.942	203.889	211.567	198.305	273.222	278.721	272.403	268.698
	AC5u0009GL001260	202.537	192.867	172.3	187.659	285.754	286.601	238.85	242.783
	AC5u0009GL001261	186.431	168.533	205.645	204.676	245.405	262.031	241.155	217.763
	AC5u0009GL001262	79.5433	81.4513	101.256	105.386	122.675	121.872	130.38	122.902
	AC5u0009GL001263	31.5676	25.3734	41.429	33.6926	42.0148	59.6449	88.3819	68.6091
	AC5u0009GL001264	653.035	695.492	439.893	460.064	673.096	729.815	599.253	615.756
	AC5u0009GL001265	670.491	694.086	422.008	417.934	721.925	710.289	595.021	595.874
	AC5u0009GL001266	556.469	564.311	359.236	348.913	648.095	606.207	526.41	500.191
	AC5u0009GL001267	6149.38	5804.11	3661.92	3554.03	5817.66	5644.62	4916.12	5019.79
	AC5u0009GL001268	37037.7	38203.5	35664.3	35306.2	33896.9	34225.2	32282.4	33639
	AC5u0009GL001269	276.959	463.538	219.648	212.618	212.101	208.848	221.249	206.203
	AC5u0009GL001270	76.2605	113.279	79.4265	70.9868	40.7918	34.9299	80.655	72.9681
	AC5u0009GL001271	31.5008	33.8111	19.4265	15.2138	3.45987	5.12356	7.9561	6.59152
	AC5u0009GL001272	41.1201	41.143	30.7715	21.2993	4.0688	3.87341	7.61134	6.53351
	AC5u0009GL001273	75.9093	84.4583	35.7447	40.3327	6.9428	6.27636	7.11629	7.75162
	AC5u0009GL001274	689.747	702.137	307.251	328.285	23.0732	21.9817	33.236	28.0416
	AC5u0009GL001275	54.5535	45.6317	249.386	252.236	39.7605	40.3137	147.23	125.393
	AC5u0009GL001276	24.6271	22.1577	110.045	116.832	21.4475	23.5615	73.3387	54.362
	AC5u0009GL001277	20.6954	15.4175	54.9314	59.395	16.0773	17.1694	36.7335	35.5774
	AC5u0009GL001278	7.64995	8.74899	10.5426	8.13007	7.24158	6.83638	9.50569	8.16735
	AC5u0009GL001279	8.08903	9.63473	9.8965	10.5171	6.85445	8.22186	11.2962	4.0743
	AC5u0009GL001280	32.9691	30.2377	34.9676	31.7661	43.524	43.7507	38.2012	37.8317
	AC5u0009GL001281	23.9145	20.144	25.3586	22.9625	39.192	36.3457	30.8699	32.5978
	AC5u0009GL001282	118.593	101.734	133.525	138.157	138.413	146.561	157.563	158.603
	AC5u0009GL001283	42.7981	32.8708	46.0868	46.1444	81.8362	83.2794	67.6628	67.6004
	AC5u0009GL001284	33.6887	28.139	20.1475	19.6988	62.3415	64.8707	41.3633	39.6824
	AC5u0009GL001285	7.62403	15.3379	19.0529	24.7504	14.7177	16.1392	16.4222	10.009
	AC5u0009GL001286	8.93164	12.1581	27.3185	28.6067	13.3205	9.75077	19.7245	21.8014
	AC5u0009GL001287	15.175	26.6378	26.5422	23.1612	17.1287	20.0097	24.1608	19.9177
	AC5u0009GL001288	24.575	39.2558	25.7855	22.4958	30.3174	31.9881	29.0984	32.7432
	AC5u0009GL001289	8028	6064.01	10929.4	11142.3	4841.3	5139.61	6029.87	5999.92
	AC5u0009GL001290	540.065	722.659	501.539	527.688	556.945	600.772	533.186	570.83
	AC5u0009GL001291	597.786	794.008	530.216	545.807	801.38	799.736	670.692	650.773
	AC5u0009GL001292	1035.16	1891.22	608.889	591.225	890.177	838.677	829.78	813.177
	AC5u0009GL001293	2648.47	2646.6	1912.88	1868.53	2841.71	2665.77	2439.35	2292.69
	AC5u0009GL001294	2744.49	2871.69	2020.23	2009.14	2910.31	2817.25	2550.58	2535.93
	AC5u0009GL001295	74.9629	83.3936	63.9252	60.9856	111.05	112.057	81.9569	77.7207
	AC5u0009GL001296	10.0188	8.10541	5.98335	6.40489	9.17095	8.67931	8.47767	6.05365
	AC5u0009GL001297	7941.47	10011.7	5448.7	5382.47	8823.9	8989.89	7603.25	8298.79
	AC5u0009GL001298	7378.68	8917.76	5011.28	4882.09	8331.23	8373.78	6764.18	6874.89
	AC5u0009GL001299	4580.17	5313.85	3391.88	3471.95	5207.64	5153.79	4379.88	4473.75
	AC5u0009GL001300	14.3952	21.8032	25.3483	19.1041	17.9347	17.9991	20.7036	21.2418
	AC5u0009GL001301	574.13	424.838	775.978	749.095	616.021	595.283	744.957	683.546
	AC5u0009GL001302	505.401	392.279	600.639	583.784	520.559	526.806	591.911	544.065
	AC5u0009GL001303	71.9597	77.6783	88.0915	85.1572	83.2763	82.8243	94.6317	90.9021
	AC5u0009GL001304	71.5048	83.1549	84.1261	83.6445	81.3891	80.6237	101.645	90.5763
	AC5u0009GL001305	50.9152	58.6342	58.8017	53.4192	64.8774	61.702	61.6363	63.8569
	AC5u0009GL001306	1808.05	1985.12	2149.56	2172.92	614.599	594.993	918.553	858.047
	AC5u0009GL001307	999.367	1310.36	965.758	928.396	387.3	360.123	448.373	447.642
	AC5u0009GL001308	995.517	1360.72	949.18	932.87	387.127	381.667	491.771	450.693
	AC5u0009GL001309	376.857	524.885	433.553	438.197	191.203	194.393	229.329	218.342
	AC5u0009GL001310	44.2802	43.9365	56.1006	48.6748	82.5892	88.5065	69.4881	64.6138
	AC5u0009GL001311	78.1374	80.2435	92.6642	79.8722	160.209	166.234	108.601	98.8332
	AC5u0009GL001312	55.2165	59.5972	61.8708	61.6052	105.474	100.289	79.7885	80.0497
	AC5u0009GL001313	76.7397	69.7203	66.1409	71.1583	163.494	185.841	119.858	127.513
	AC5u0009GL001314	55.0441	37.9796	20.1896	26.3274	137.876	151.209	87.5724	81.9326
	AC5u0009GL001315	36.6909	24.3658	16.4134	15.445	96.2831	105.728	54.7455	52.7133
	AC5u0009GL001316	35.45	27.6719	31.5874	27.689	75.951	88.7657	48.4527	60.3519
	AC5u0009GL001317	33.2003	23.3339	17.6575	21.7434	68.5191	75.1916	37.6202	42.0766
	AC5u0009GL001318	74.1082	72.3946	102.468	99.0677	71.6762	72.7286	80.8367	74.923
	AC5u0009GL001319	221.169	267.921	147.685	143.883	167.332	169.951	153.999	127.348
	AC5u0009GL001320	66.9255	70.4736	83.2562	65.3868	112.1	100.005	87.3099	81.7678
	AC5u0009GL001321	233.046	297.092	183.164	173.502	223.594	199.05	200.229	176.784
	AC5u0009GL001391	15.8829	18.1575	25.195	23.5691	22.2731	19.7335	24.1376	20.9628
	AC5u0009GL001392	98.1121	65.8832	228.719	222.313	228.116	217.118	267.518	264.725
	AC5u0009GL001393	81.4565	50.7236	193.895	185.394	188.812	173.012	220.311	204.975
	AC5u0009GL001394	235.433	260.184	253.515	276.761	122.479	144.484	217.467	264.979
	AC5u0009GL001395	195.571	187.674	284.725	293.972	176.498	165.01	240.539	222.815
	AC5u0009GL001396	858.746	1721.23	562.919	528.401	532.796	499.258	543.883	549.924
	AC5u0009GL001397	2.45364	11.5306	4.79395	2.63134	7.03134	11.4536	5.16505	7.23366
	AC5u0009GL001398	5.74386	5.4614	8.1186	8.71212	10.7237	9.59434	11.2428	8.43855
	AC5u0009GL001399	65.9104	84.2691	56.8955	64.4753	63.569	64.6108	60.2562	54.3317
	AC5u0009GL001400	94.1981	123.6	90.388	97.9886	91.0271	88.6134	85.9034	101.858
	AC5u0009GL001401	32.2691	48.0245	32.7821	37.9535	31.4848	26.2262	36.1616	32.0677
	AC5u0009GL001402	3142.87	3024.94	3711.05	4182.46	1297.02	2173.41	4047.36	6614.44
	AC5u0009GL001403	39.0141	86.9241	26.3177	19.7489	35.6403	34.9966	34.0019	26.0524
	AC5u0009GL001404	23.7745	66.2275	17.0909	16.0394	23.3483	29.7397	29.4108	26.5023
	AC5u0009GL001405	3.05138	6.23049	4.9776	3.82216	6.36073	6.83475	6.98636	3.54675
	AC5u0009GL001406	28.5765	24.0542	23.1547	23.7107	39.6189	35.2554	31.0927	28.5737
	AC5u0009GL001407	58.3087	50.3411	67.4151	63.1997	70.5626	74.1531	84.4171	70.034
	AC5u0009GL001408	60.9125	115.734	47.7367	44.6047	51.2682	72.1731	63.8276	60.2835
	AC5u0009GL001409	43.7298	79.9058	35.9389	38.0164	46.6217	41.7677	42.9298	42.3725
	AC5u0009GL001410	32.6293	62.6903	30.7333	26.0222	32.5065	32.0262	35.2068	36.9846
	AC5u0009GL001411	39.7212	68.4511	31.9441	28.5194	32.7777	37.6177	34.6509	40.5899
	AC5u0009GL001412	6.26247	15.4156	3.62872	3.33469	6.58027	2.13159	9.71995	6.26816
	AC5u0009GL001413	4.35377	15.7605	3.34567	2.68549	5.92021	4.88161	5.15673	3.99885
	AC5u0009GL001414	128.22	120.938	113.145	107.257	150.089	156.608	137.243	121.139
	AC5u0009GL001415	807.1	704.259	773.772	769.25	584.943	651.289	694.835	716.267
	AC5u0009GL001416	863.71	769.646	767.936	781.028	670.918	711.623	745.536	710.918
	AC5u0009GL001417	675.411	575.741	758.556	737.848	562.417	554.187	655.782	662.363
	AC5u0009GL001418	371.113	339.258	365.827	363.384	306.887	312.817	293.322	303.541
	AC5u0009GL001419	307.072	313.679	328.972	319.623	483.266	502.758	460.472	486.134
	AC5u0009GL001420	149.723	149.959	170.01	153.212	286.227	276.415	220.476	197.737
	AC5u0009GL001421	230.745	211.012	268.788	238.79	453.189	432.87	387.79	365.951
	AC5u0009GL001422	209.42	186.287	246.866	213.798	370.411	338.3	334.694	289.435
	AC5u0009GL001423	198.094	183.702	214.369	196.148	326.135	301.113	283.367	257.517
	AC5u0009GL001424	229.158	226.599	245.956	233.484	361.32	353.269	303.014	300.596
	AC5u0009GL001425	108.27	111.759	119.95	107.532	173.311	182.937	171.401	141.251
	AC5u0009GL001426	183.819	180.953	225.59	210.003	250.028	241.005	262.413	226.743
	AC5u0009GL001427	251.354	266.988	317.584	295.057	345.285	348.384	372.971	342.126
	AC5u0009GL001428	1724.82	1577.27	2473.25	2362.34	1629.88	1731.78	2052.05	2028.2
	AC5u0009GL001429	576.444	350.568	409.479	397.198	592.816	566.615	433.042	421.117
	AC5u0009GL001430	1752.89	1474.87	1031.29	1043.02	171.185	152.856	137.743	133.269
	AC5u0009GL001431	51.7435	59.8477	113.11	146.496	69.1973	74.438	54.1773	53.4478
	AC5u0009GL001432	132.498	154.616	96.2242	93.3324	262.301	252.199	165.937	175.592
	AC5u0009GL001433	318.541	703.818	234.109	229.484	289.001	300.149	216.069	241.647
	AC5u0009GL001434	28.456	26.6278	29.5354	29.7641	5152.83	4835.42	3845	3934.67
	AC5u0009GL001435	10.7287	16.1314	14.9153	19.4118	3188.34	3030.64	2413.91	2383.5
	AC5u0009GL001436	25.173	25.5074	23.3772	24.166	15.5764	15.4501	13.5164	14.371
	AC5u0009GL001437	25.8812	22.4265	25.5763	26.1806	9.92289	7.70071	12.8889	9.63416
	AC5u0009GL001438	31.6716	27.6484	33.6725	34.4917	11.7507	10.7595	16.9313	15.7903
	AC5u0009GL001439	1003.86	589.981	1550.84	1553.06	271.115	309.719	433.607	446.799
	AC5u0009GL001440	59.157	70.0903	46.9922	48.0551	50.86	48.9117	46.0317	42.713
	AC5u0009GL001441	118.738	117.634	179.666	178.73	147.321	140.053	156.068	157.28
	AC5u0009GL001442	93.9601	97.2363	95.5953	95.5268	115.653	128.164	130.427	134.546
	AC5u0009GL001443	80.8265	96.2922	161.045	159.291	94.7772	89.6623	171.719	171.089
	AC5u0009GL001444	49.968	66.3952	92.4062	85.5388	70.3226	86.358	130.787	125.696
	AC5u0009GL001445	22.7201	15.4234	32.9195	28.1616	26.1151	26.6066	27.0905	30.2313
	AC5u0009GL001456	148.483	107.776	141.891	137.232	175.94	169.505	176.398	163.918
	AC5u0009GL001457	86.5112	59.361	82.5197	74.1017	103.317	99.9833	98.8775	80.2695
	AC5u0009GL001458	41.1373	40.1012	52.5008	44.6263	54.8418	49.603	60.9237	45.9373
	AC5u0009GL001459	21.1746	25.6891	37.2263	32.3945	29.0629	23.8613	32.2431	32.5854
	AC5u0009GL001460	34.6954	29.6914	32.8205	38.1622	22.4345	30.0133	38.3498	32.347
	AC5u0009GL001461	33.1911	37.5686	42.8353	41.9754	37.0552	33.8923	41.9436	45.8868
	AC5u0009GL001462	9.57436	14.5897	23.1997	19.3471	20.9588	13.0355	28.3819	18.2078
	AC5u0009GL001463	62.9365	55.9479	76.2324	79.0369	112.064	119.54	102.595	93.8922
	AC5u0009GL001464	49.5531	51.7762	70.1659	68.4068	98.3077	90.107	85.2657	81.3
	AC5u0009GL001465	122.633	110.418	119.274	112.625	133.095	129.48	134.274	125.586
	AC5u0009GL001466	1604.85	2348.46	5578.11	5512.13	968.924	1023.41	2137.05	2106.04
	AC5u0009GL001467	104.764	171.979	94.7239	103.548	88.8806	99.9305	121.875	117.753
	AC5u0009GL001468	103.168	150.61	100.927	98.8204	81.7816	81.5301	114.336	113.527
	AC5u0009GL001469	266.265	425.66	236.486	250.012	171.452	170.3	232.987	236
	AC5u0009GL001470	179.243	263.473	177.752	184.469	120.668	137.342	166.123	168.712
	AC5u0009GL001471	81.1005	72.6186	110.599	98.4273	74.6298	87.7798	102.439	96.6573
	AC5u0009GL001472	85.9413	83.618	110.85	109.548	89.6105	90.2478	110.675	112.093
	AC5u0009GL001473	960.497	889.818	515.493	529.493	796.524	839.926	654.611	740.41
	AC5u0009GL001474	872.734	849.275	464.484	468.083	736.817	770.038	575.733	598.281
	AC5u0009GL001475	174.821	220.249	185.822	178.801	227.069	221.569	233.243	203.374
	AC5u0009GL001476	111.204	129.011	202.124	215.318	92.8106	97.0469	149.001	141.299
	AC5u0009GL001477	710.218	533.231	787.617	847.512	551.726	768.955	841.678	1490.67
	AC5u0009GL001478	301.685	216.953	316.174	318.607	349.857	349.039	327.903	337.617
	AC5u0009GL001479	370.601	277.9	339.165	364.159	393.906	413.183	369.71	394.107
	AC5u0009GL001480	1780.44	1503.95	4488.01	4465.61	1397.43	1404.84	2131.33	2027.65
	AC5u0009GL001481	345.565	576.993	470.684	465.475	570.144	548.415	530.551	514.789
	AC5u0009GL001482	1053.88	2280.81	2482.9	2315.68	1407.57	1464.08	2211.73	2200.72
	AC5u0009GL001483	194.376	173.27	224.402	224.322	78.3898	87.7292	90.7561	90.8251
	AC5u0009GL001484	32.394	28.8408	50.7944	48.9903	65.6866	65.7743	70.2891	63.0047
	AC5u0009GL001485	63.8517	42.9931	74.92	75.8443	166.555	160.568	112.126	123.131
	AC5u0009GL001486	43.2995	123.634	22.8908	21.4824	156.861	138.331	420.87	362.097
	AC5u0009GL001487	93.2198	90.1328	359.735	360.815	58.4297	63.0037	179.254	144.561
	AC5u0009GL001488	140.33	245.689	153.64	161.899	190.618	193.46	158.296	153.838
	AC5u0009GL001489	26.3209	27.4852	33.05	37.3212	52.6882	59.9754	57.5342	53.7434
	AC5u0009GL001490	513.833	510.7	446.477	437.37	749.078	729.02	677.595	681.846
	AC5u0009GL001491	541.574	535.416	475.362	469.165	760.021	760.522	696.29	821.599
	AC5u0009GL001492	37.663	37.2187	33.8575	32.3697	120.766	117.366	77.1615	75.9719
	AC5u0009GL001493	44.0739	36.4062	124.674	128.901	222.725	296.388	1415.67	1376.9
	AC5u0009GL001494	36.5497	25.8079	87.7864	92.0252	162.166	217.337	1109.06	1057.22
	AC5u0009GL001495	25.6005	16.9977	57.2043	62.8287	115.405	143.268	732.656	628.57
	AC5u0009GL001496	33.3951	23.6663	105.789	109.545	230.494	259.417	1565.2	1458.06
	AC5u0009GL001497	40.8197	22.4494	142.408	133.804	342.286	405.459	2512.91	2228.23
	AC5u0009GL001498	77.9671	166.09	43.5195	41.8695	82.7133	79.4096	70.4735	62.5908
	AC5u0009GL001499	323.974	383.9	285.822	278.644	385.146	373.167	361.276	472.608
	AC5u0009GL001500	446.747	545.406	355.504	337.01	553.106	520.663	493.377	523.317
	AC5u0009GL001501	697.672	1396.07	816.75	768.098	752.021	760.824	829.486	812.659
	AC5u0009GL001502	1001.83	1749.05	1092.96	1054.78	1034.48	1035.96	1098.64	1144.25
	AC5u0009GL001503	431.877	319.289	606.151	606.827	886.303	899.433	1384.53	1316.51
	AC5u0009GL001504	64.1553	69.3129	30.3872	31.0997	31.1056	26.9674	39.145	30.5147
	AC5u0009GL001505	924.485	1056.31	290.217	322.099	122.076	127.275	109.975	106.252
	AC5u0009GL001506	943.034	1013.19	262.176	280.477	125.682	123.374	94.5361	102.387
	AC5u0009GL001507	847.777	894.446	251.451	278.942	127.752	102.269	89.1363	88.7291
	AC5u0009GL001508	779.499	784.733	244.929	272.087	116.251	116.561	86.0762	93.7577
	AC5u0009GL001509	7.35807	12.0646	16.6993	11.3294	14.1588	14.1735	15.5297	17.5689
	AC5u0009GL001510	99.7749	115.123	110.141	110.744	76.3047	86.6421	76.4365	86.2138
	AC5u0009GL001511	148.819	148.576	263.989	265.338	239.874	240.841	322.621	302.281
	AC5u0009GL001512	180.849	195.451	418.267	404.962	269.562	262.907	378.48	337.225
	AC5u0009GL001513	9.79424	7.6718	27.7934	29.0088	22.7468	21.8296	26.7884	25.4461
	AC5u0009GL001514	61.6819	54.7786	101.792	94.4997	89.9523	80.102	102.331	80.1998
	AC5u0009GL001515	173.828	342.522	260.374	268.977	166.553	197.395	221.914	346.779
	AC5u0009GL001516	187.961	186.684	336.926	390.583	119.704	132.591	183.54	161.151
	AC5u0009GL001517	5110.24	3071.98	5100.76	5050.25	256.177	236.681	329.278	332.637
	AC5u0009GL001518	699.501	871.28	854.4	838.092	341.993	346.713	384.241	413.997
	AC5u0009GL001519	311.033	305.539	432.775	467.016	122.648	116.713	175.357	156.166
	AC5u0009GL001520	271.03	260.462	409.934	436.955	107.458	111.962	157.933	137.114
	AC5u0009GL001521	337.98	233.531	181.099	188.998	42.5473	37.8109	43.5023	33.5477
	AC5u0009GL001522	116.23	131.752	71.9694	68.8049	201.347	194.565	151.034	148.805
	AC5u0009GL001523	117.7	125.109	83.9673	69.5518	206.933	189.93	172.098	164.039
	AC5u0009GL001524	112.282	123.092	73.415	75.731	184.817	182.859	162.888	168.606
	AC5u0009GL001525	183.243	226.583	256.959	259.031	121.426	142.93	181.845	179.193
	AC5u0009GL001526	280.182	328.213	347.541	346.316	189.796	206.36	287.604	273.758
	AC5u0009GL001527	218.397	242.836	279.389	262.325	145.022	159.659	229.966	232.549
	AC5u0009GL001528	233.193	268.038	290.783	282.683	174.568	170.524	234.77	208.398
	AC5u0009GL001529	297.413	318.838	382.229	374.433	204.082	193.626	281.502	257.465
	AC5u0009GL001530	315.718	328.03	410.859	405.667	216.932	211.003	289.062	280.347
	AC5u0009GL001531	162.652	229.821	199.147	207.031	152.567	153.625	163.951	160.155
	AC5u0009GL001532	615.374	849.568	681.755	660.254	711.993	691.523	702.849	667.715
	AC5u0009GL001533	501.454	697.27	510.253	496.622	616.817	596.655	582.825	563.23
	AC5u0009GL001534	377.581	525.705	395.053	380.731	461.491	445.818	455.45	414.57
	AC5u0009GL001535	66.1936	65.8527	84.6375	82.684	75.2993	69.8388	80.5013	88.7913
	AC5u0009GL001536	29.3696	37.9952	42.2577	41.026	30.3466	31.537	45.361	33.3973
	AC5u0009GL001537	37.3694	41.8032	64.3553	67.7353	35.298	35.3689	53.2734	40.1129
	AC5u0009GL001538	940.573	906.564	1478.63	1507.91	1361.72	1378.47	1585.73	1633.25
	AC5u0009GL001539	30.1362	35.7122	54.0171	56.8837	49.5226	42.4758	58.6713	54.9555
	AC5u0009GL001540	32.3473	34.9288	57.2669	59.9114	44.8258	42.7416	58.1116	54.5476
	AC5u0009GL001606	1352.35	1280.65	2429.05	2346.75	1244.61	1116.23	1363.52	1154.79
	AC5u0009GL001607	1414.18	1292.56	2504.17	2567.08	1326.25	1203.57	1435.88	1185.77
	AC5u0009GL001608	2288.32	1802.68	4324.84	4443.82	1774.73	1763.23	1998.46	2001.7
	AC5u0009GL001609	78.9579	102.951	70.7696	73.4912	106.07	98.2356	93.1735	78.1888
	AC5u0009GL001610	49.1608	76.25	38.0305	42.3736	78.0667	73.0388	53.152	43.4059
	AC5u0009GL001611	50.354	81.6776	35.9389	32.1871	80.9165	66.0052	48.9096	38.3322
	AC5u0009GL001612	3070.29	3525.31	2370.41	2302.37	2304.25	2093.15	1926.22	1756.29
	AC5u0009GL001613	218.662	294.226	440.204	437.617	169.21	163.365	235.302	225.72
	AC5u0009GL001614	44.815	60.3904	75.9107	61.0927	53.8951	45.5575	41.2408	35.7444
	AC5u0009GL001615	73.3524	70.6143	96.9302	87.5536	121.483	123.045	111.72	101.524
	AC5u0009GL001616	76.7793	77.668	97.4362	95.7993	115.545	117.786	102.614	92.7105
	AC5u0009GL001617	125.787	112.407	148.93	152.205	194.193	178.265	157.015	142.625
	AC5u0009GL001618	132.466	99.8395	152.555	161.81	239.626	205.854	168.853	159.267
	AC5u0009GL001619	365.166	393.838	462.058	456.345	356.146	364.392	370.453	368.218
	AC5u0009GL001620	112.063	94.6828	186.915	185.919	123.218	147.166	141.887	157.458
	AC5u0009GL001621	440.081	524.134	433.402	447.368	602.543	597.075	452.732	422.362
	AC5u0009GL001622	309.768	369.264	294.403	293.37	432.223	393.839	303.933	279.699
	AC5u0009GL001623	377.607	451.054	340.793	335.042	549.749	495.824	379.08	346.673
	AC5u0009GL001624	19458.2	15008.2	15252.3	15207.3	16027.5	15424.2	14296.2	13776.6
	AC5u0009GL001625	104.811	97.7822	87.9398	81.2245	158.114	156.859	143.972	145.396
	AC5u0009GL001626	113.092	102.646	179.39	184.542	234.137	220.697	184.791	170.234
	AC5u0009GL001627	365.749	285.825	506.045	516.649	465.946	447.686	406.127	394.563
	AC5u0009GL001628	284.657	194.126	286.936	310.997	935.193	950.05	452.69	479.86
	AC5u0009GL001629	41.3693	51.4679	39.5352	35.4465	59.0308	57.7996	50.3691	49.8031
	AC5u0009GL001630	40.8614	51.448	41.06	42.3896	55.6467	56.9705	50.7147	50.2841
	AC5u0009GL001631	35.7039	65.9875	39.6528	42.2076	58.6006	54.5358	53.9637	46.6834
	AC5u0009GL001632	351.341	233.998	691.261	721.973	390.347	393.521	570.658	575.835
	AC5u0009GL001633	5.36251	8.33699	7.13625	4.99418	8.30368	7.57555	12.2183	12.5427
	AC5u0009GL001634	9.36846	7.05955	12.1259	7.45547	11.9533	11.1933	17.2917	16.0748
	AC5u0009GL001635	8.01955	9.92792	12.6214	11.8255	11.608	8.11735	13.5936	8.25617
	AC5u0009GL001636	6.03674	7.87382	7.63182	8.63192	7.26572	9.3505	8.95061	6.98701
	AC5u0009GL001637	573.707	1079.09	654.045	626.406	482.662	526.086	550.864	537.613
	AC5u0009GL001638	33.0709	27.3954	39.4336	38.68	43.4364	39.5148	46.1205	38.9537
	AC5u0009GL001639	44.9726	49.377	49.1483	45.0962	40.7227	35.2224	46.1838	42.3652
	AC5u0009GL001640	84.8986	79.2979	95.5134	81.9493	60.9513	59.0277	84.3126	81.3613
	AC5u0009GL001641	11.7357	11.5588	15.2676	18.6696	13.6104	16.5938	18.4335	17.3125
	AC5u0009GL001642	11.1514	9.55525	21.547	21.6376	13.2011	15.23	20.7377	19.3596
	AC5u0009GL001643	26.208	26.3876	48.9978	45.905	33.3685	31.9795	51.2235	38.0404
	AC5u0009GL001644	35.3781	32.6855	59.0926	53.1164	43.2564	36.4071	62.6003	53.8236
	AC5u0009GL001645	20.4904	21.1402	42.3893	45.669	23.3096	22.7266	35.7456	33.0178
	AC5u0009GL001646	24.0903	23.2494	52.9026	57.0124	23.0628	25.6145	41.3204	38.0437
	AC5u0009GL001647	22.7383	20.5867	42.476	41.7867	20.3262	22.179	31.7756	32.3041
	AC5u0009GL001648	25.1333	24.7159	52.2119	56.678	23.6882	26.2354	40.4344	33.5246
	AC5u0009GL001649	15.2734	14.1088	41.1158	37.1256	18.2841	21.3712	27.1578	18.436
	AC5u0009GL001650	17.6809	12.0042	37.4021	34.0742	17.8424	21.0423	26.4364	15.5593
	AC5u0009GL001651	7.93137	5.49177	13.473	12.8046	9.34331	8.73447	12.2137	8.02355
	AC5u0009GL001652	31.6353	33.9211	34.7491	35.3477	37.3276	40.8524	43.684	42.5647
	AC5u0009GL001654	518.772	428.192	382.611	380.668	833.699	836.236	664.751	584.848
	AC5u0009GL001655	421.086	340.347	304.008	318.115	704.576	702.1	543.765	560.722
	AC5u0009GL001656	346.788	300.637	270.734	265.108	555.937	548.244	436.049	451.004
	AC5u0009GL001657	219.868	189.617	168.437	172.038	328.312	329.404	275.962	264.137
	AC5u0009GL001658	193.292	173.658	144.224	145.739	272.309	276.816	228.351	240.24
	AC5u0009GL001659	273.595	231.539	198.114	206.918	388.75	388.19	307.215	289.58
	AC5u0009GL001660	228.818	199.132	160.967	161.458	318.791	340.657	256.773	268.721
	AC5u0009GL001661	1420.98	1505.31	800.521	818.297	441.706	445.77	351.006	356.368
	AC5u0009GL001662	1737.92	1742.39	797.966	818.05	645.618	617.391	439.844	426.888
	AC5u0009GL001663	3286.74	3356.84	1710.06	1690.01	2240.23	2142.02	1924.86	2111.45
	AC5u0009GL001664	73.9117	56.6406	104.009	103.777	146.735	138.474	156.837	149.643
	AC5u0009GL001665	543.215	355.582	2490.43	2442.41	1356.83	1593.65	3239.24	3220.92
	AC5u0009GL001666	331.324	204.669	1571.73	1524.85	860.096	941.708	2026.28	1853.89
	AC5u0009GL001667	192.627	114.902	1113.47	1075.64	534.727	574.688	1345.26	1277.73
	AC5u0009GL001668	147.677	115.7	347.101	329.764	308.033	313.901	414.134	373.932
	AC5u0009GL001669	151.407	107.731	290.791	271.09	269.18	281.468	357.881	357.062
	AC5u0009GL001670	134.154	104.313	267.916	247.539	223.588	252.302	334.56	319.133
	AC5u0009GL001671	92.8814	71.9785	180.651	186.266	195.227	188.181	240.682	238.624
	AC5u0009GL001672	92.4467	79.3015	168.905	169.594	185.854	186.837	232.011	215.439
	AC5u0009GL001673	87.9655	79.3586	145.947	148.166	177.141	172.24	199.855	204.229
	AC5u0009GL001674	84.0416	73.035	127.456	120.749	140.241	150.458	166.295	175.689
	AC5u0009GL001675	36.452	31.0838	37.397	33.3442	46.9901	47.6362	51.9115	46.0202
	AC5u0009GL001676	56.4758	45.1732	53.6951	50.0579	80.4397	78.13	80.801	72.767
	AC5u0009GL001677	60.8155	57.3464	60.89	59.8278	94.844	89.1984	83.4073	88.8694
	AC5u0009GL001678	49.0207	47.5401	55.5178	50.1561	79.0063	79.8022	72.3148	68.8446
	AC5u0009GL001679	63.29	52.1006	58.0763	61.853	109.122	114.099	94.924	83.2312
	AC5u0009GL001680	84.7817	70.5382	115.495	118.771	33.6961	30.1265	34.2631	31.0546
	AC5u0009GL001681	477.437	510.546	423.982	418.099	367.91	353.805	321.318	312.312
	AC5u0009GL001682	22.1274	33.2646	32.1702	27.1906	35.1661	31.3101	26.7325	18.2717
	AC5u0009GL001683	42.4657	33.7354	122.192	112.199	145.692	141.833	162.73	150.237
	AC5u0009GL001684	33.9455	29.71	102.042	103.818	133.689	119.65	147.776	142.021
	AC5u0009GL001685	45.0332	38.6371	129.679	125.5	139.838	144.036	178.692	165.105
	AC5u0009GL001686	43.5293	34.3815	100.317	103.246	120.778	129.709	145.509	137.65
	AC5u0009GL001687	42.9345	39.2957	99.542	86.7824	124.859	122.928	130.257	124.609
	AC5u0009GL001688	59.1322	47.2619	125.724	117.62	131.664	136.01	153.408	151.61
	AC5u0009GL001689	2091.09	2366.26	1826.32	1805.18	1319.41	1374.84	1281.88	1339.83
	AC5u0009GL001690	89.3308	141.064	55.6204	59.5643	154.056	157.685	126.723	112.615
	AC5u0009GL001691	1.2368	1.30477	3.12719	4.53176	3.54425	3.0179	6.33901	5.13174
	AC5u0009GL001692	14.7516	17.5077	11.2972	11.0157	21.6109	19.6153	20.0637	17.8032
	AC5u0009GL001693	2.53091	2.95609	3.54247	1.6883	3.32418	5.59071	5.82407	3.25698
	AC5u0009GL001694	6.46759	5.00842	13.4825	12.2763	17.7486	18.3072	21.2657	17.3131
	AC5u0009GL001695	774.947	464.096	940.858	923.756	1009.36	996.793	1106.34	1067.63
	AC5u0009GL001696	647.927	885.164	474.049	454.225	154.688	140.062	163.572	158.006
	AC5u0009GL001697	69.779	80.2691	137.478	132.47	100.751	97.4016	126.628	114.876
	AC5u0009GL001698	56.0241	61.0387	90.0505	85.456	96.3078	93.9533	102.435	100.13
	AC5u0009GL001699	85.1877	78.3634	155.101	151.16	137.749	152.075	166.576	146.499
	AC5u0009GL001700	116.51	103.594	248.765	238.01	239.337	229.56	249.918	233.914
	AC5u0009GL001701	159.52	144.476	248.936	246.981	235.239	238.176	279.548	277.311
	AC5u0009GL001702	830.945	610.656	769.09	766.027	1023.72	978.902	844.404	828.429
	AC5u0009GL001703	21.007	27.8867	30.32	28.2231	32.3738	34.7299	31.0187	52.9858
	AC5u0009GL001704	1723.33	2163.1	2570.12	2517.77	2288.77	2259.65	2589.31	2260.98
	AC5u0009GL001705	176.584	154.713	132.982	133.19	182.773	175.963	158.075	143.655
	AC5u0009GL001706	118.276	134.087	116.17	102.461	211.928	206.941	199.345	195.425
	AC5u0009GL001707	2007.75	1867.25	2282.77	2011.66	3293.71	3005.02	2579.83	3350.26
	AC5u0009GL001708	561.603	790.594	559.397	538.885	532.889	541.326	524.843	535.713
	AC5u0009GL001709	175.661	213.471	132.377	127.673	314.884	315.827	243.464	258.901
	AC5u0009GL001710	306.687	215.49	199.053	197.802	495.979	502.93	341.085	374.558
	AC5u0009GL001711	175.995	189.775	488.899	543.61	188.048	189.008	296.306	247.56
	AC5u0009GL001712	93.3013	92.4701	214.32	202.078	141.289	146.162	161.979	144.973
	AC5u0009GL001713	86.7257	79.2933	91.0921	83.2568	143.422	124.536	131.217	113.552
	AC5u0009GL001714	6.04652	3.43092	4.83	5.07495	1.60907	1.25282	1.76424	1.91515
	AC5u0009GL001721	37.7845	24.4899	29.3478	38.6009	8.56317	9.22241	18.1499	17.2039
	AC5u0009GL001801	326.506	229.579	433.076	440.674	605.476	647.795	599.017	615.548
	AC5u0009GL001802	113.141	88.9664	159.665	155.536	226.908	228.082	222.725	225.829
	AC5u0009GL001803	62.0659	54.7726	81.6562	77.9513	111.137	116.16	124.583	136.535
	AC5u0009GL001804	18.2011	15.8475	33.9628	38.4418	30.4826	34.9683	36.5683	31.5984
	AC5u0009GL001805	2502.32	1813.56	3598.06	3843.48	2965.46	2922.45	2780.53	2836.78
	AC5u0009GL001806	3666.45	2794.01	5156.8	5398.76	3985.59	4161.71	4162	4268.58
	AC5u0009GL001807	508.995	479.765	652.431	686.15	562.333	561.645	584.385	620.696
	AC5u0009GL001808	63.088	51.4505	57.4468	60.4259	71.5376	72.8726	66.1965	65.8026
	AC5u0009GL001809	89.3164	77.5908	150.599	166.594	75.2442	71.4649	132.27	134.332
	AC5u0009GL001810	122.221	103.959	214.193	213.21	116.734	121.729	193.229	183.943
	AC5u0009GL001811	103.595	91.7547	189.996	181.665	100.054	104.313	163.502	146.143
	AC5u0009GL001812	658.922	946.349	775.993	739.557	342.194	372.299	515.698	458.647
	AC5u0009GL001813	91.3733	120.422	154.382	165.424	74.0045	74.96	116.61	102.964
	AC5u0009GL001814	46.1389	77.8965	52.8062	55.7209	39.1717	42.4298	48.1459	40.5395
	AC5u0009GL001815	426.743	540.341	764.058	726.498	481.548	449.736	669.183	595.758
	AC5u0009GL001816	975.918	1963.3	853.575	843.414	390.505	368.07	547.056	543.936
	AC5u0009GL001817	486.145	512.954	1088.69	1044.02	433.639	437.038	752.7	680.428
	AC5u0009GL001818	33.0724	30.7269	41.502	43.086	47.3373	47.1542	47.3599	49.4544
	AC5u0009GL001819	3.90067	5.61143	3.58642	2.09158	2.23561	1.6553	6.06908	3.83322
	AC5u0009GL001820	35.7537	27.935	40.5213	39.1064	46.4151	45.4746	42.1381	43.4319
	AC5u0009GL001821	123.771	79.0617	80.2888	75.2677	231.042	210.351	302.965	295.001
	AC5u0009GL001822	139.49	217.365	168.448	166.663	95.2288	93.6402	129.69	117.961
	AC5u0009GL001823	107.291	175.704	132.163	139.169	91.4074	94.3189	109.439	94.8413
	AC5u0009GL001824	24.2325	23.9504	31.9505	30.8601	38.7076	34.2066	34.3151	31.0898
	AC5u0009GL001825	5.63429	6.8896	5.66605	5.28705	11.4368	12.7022	16.7594	11.5352
	AC5u0009GL001826	5.44804	7.07381	6.43344	8.18071	13.5878	12.8555	15.3095	11.649
	AC5u0009GL001827	8.20301	8.87256	11.9803	12.5764	19.5101	17.6944	17.6798	15.8637
	AC5u0009GL001828	29.9091	44.8163	35.2186	33.4353	57.8824	62.163	58.5573	52.3354
	AC5u0009GL001829	36.5333	47.599	32.4907	32.3454	73.0205	73.2317	62.0161	52.3927
	AC5u0009GL001830	72.066	54.9346	121.601	119.489	67.251	72.9388	91.4827	88.6107
	AC5u0009GL001831	319.674	313.919	439.338	408.082	499.614	474.302	508.288	533.944
	AC5u0009GL001832	194.316	201.595	140.579	136.351	279.73	285.508	211.247	222.354
	AC5u0009GL001833	5186.2	8494.87	3519.51	3440.21	422.995	393.859	400.559	380.021
	AC5u0009GL001834	666.588	969.244	363.372	368.432	147.01	148.212	106.28	106.031
	AC5u0009GL001835	435.37	667.491	240.364	243.519	104.447	101.994	86.193	73.2621
	AC5u0009GL001836	92.4402	65.6538	121.006	120.211	125.429	132.936	103.325	111.903
	AC5u0009GL001837	56.518	55.0092	70.3813	64.9937	90.2283	84.0721	69.6869	67.968
	AC5u0009GL001838	27.9809	24.7686	36.1874	29.7199	45.9599	37.9084	53.4261	53.6948
	AC5u0009GL001839	303.298	288.273	450.194	438.117	447.65	391.591	431.662	407.195
	AC5u0009GL001840	161.488	175.077	175.645	144.528	278.556	281.319	219.344	209.038
	AC5u0009GL001841	112.552	127.828	172.619	168.372	176.78	191.374	160.866	169.748
	AC5u0009GL001842	143.548	147.929	181.92	174.846	197.554	215.326	179.768	201.851
	AC5u0009GL001843	69.3317	145.833	51.4457	53.7795	48.6096	47.1322	55.1382	45.422
	AC5u0009GL001844	138.149	228.43	132.384	121.743	107.44	96.5348	121.754	113.403
	AC5u0009GL001845	71.7412	82.0672	107.088	115.277	59.6394	72.2902	95.1417	96.8953
	AC5u0009GL001846	139.17	148.738	168.397	183.465	171.471	170.396	158.285	141.627
	AC5u0009GL001847	39854.3	35783	100243	114278	23133.1	27630.7	35851.3	25810.1
	AC5u0009GL001848	539.021	883.396	558.9	548.13	708.435	736.08	679.961	672.391
	AC5u0009GL001849	18.0988	34.7616	16.7236	17.0237	20.2176	19.7881	20.6426	16.1051
	AC5u0009GL001850	17.7474	40.6281	12.8776	15.1358	20.3769	20.8027	20.234	14.0226
	AC5u0009GL001851	13.2918	37.0417	9.71323	11.4805	16.7112	19.5464	12.7629	13.4731
	AC5u0009GL001852	269.986	164.73	470.922	462.441	9943.9	10349.7	7588.83	7728.13
	AC5u0009GL001853	459.943	1010	277.376	275.435	473.773	482.022	336.142	359.968
	AC5u0009GL001854	76.1505	227.608	52.2547	54.4576	64.3389	59.4722	58.4343	53.8268
	AC5u0009GL001855	215.9	400.841	137.003	142.447	198.441	196.03	174.573	175.788
	AC5u0009GL001856	331.157	540.881	205.991	203.188	318.194	319.556	253.571	243.32
	AC5u0009GL001857	339.481	562.129	257.712	247.085	378.528	376.483	308.652	311.944
	AC5u0009GL001858	784.679	530.792	858.86	944.812	2858.22	2814.8	1858.72	1875.49
	AC5u0009GL001868	1575.74	1644.73	3197.59	3245.56	1986.55	1898.88	2271.24	2228.68
	AC5u0009GL001869	13359.7	11175.7	16803.5	16650.8	12859.6	13000.5	14435	14378.3
	AC5u0009GL001870	3060.89	2647.89	4069.86	4053.66	3010.36	3074.04	3737.51	3747.51
	AC5u0009GL001871	176.964	185.698	357.509	358.589	242.094	239.764	316.947	317.794
	AC5u0009GL001872	16310.3	14347.5	18438.9	18116.2	9070.15	9451.52	11111.5	11781.5
	AC5u0009GL001873	80.9978	61.587	160.047	150.197	173.337	175.536	244.214	231.324
	AC5u0009GL001942	77.3202	76.5961	168.878	140.588	126.49	116.642	127.207	117.784
	AC5u0009GL001943	56.9543	50.3581	113.739	106.277	94.6887	85.3816	102.103	70.5505
	AC5u0009GL001944	147.943	130.407	198.689	185.215	184.872	180.221	194.753	186.408
	AC5u0009GL001945	111.866	108.829	141.295	136.255	166.842	160.794	149.751	136.822
	AC5u0009GL001946	148.892	135.896	169.621	178.931	212.581	213.584	189.086	169.321
	AC5u0009GL001947	127.473	120.475	155.717	159.506	174.086	166.466	158.65	159.329
	AC5u0009GL001948	47.5086	65.7679	65.1601	66.5453	58.4358	52.2975	55.6729	49.9028
	AC5u0009GL001949	12.3545	12.839	15.3858	13.5953	15.1127	14.8481	11.6955	12.8455
	AC5u0009GL001950	113.814	71.6671	158.89	147.16	85.9122	82.768	114.866	132.661
	AC5u0009GL001951	162.774	121.366	238.584	215.359	39.6078	43.4188	133.071	144.204
	AC5u0009GL001952	154.452	115.403	241.571	222.097	43.027	42.6017	146.381	126.251
	AC5u0009GL001953	8.08903	7.4325	3.9586	3.33469	9.59623	7.00381	9.19455	3.44749
	AC5u0009GL001954	9.65465	10.3994	34.4178	35.0285	13.9526	15.767	109.255	91.0973
	AC5u0009GL001955	12.6691	12.0391	51.2288	39.0745	20.5269	16.8164	138.648	110.699
	AC5u0009GL001956	10.5468	12.1581	51.7892	49.609	15.4855	19.6849	142.607	124.244
	AC5u0009GL001957	11.0637	11.3646	8.28181	7.0123	6.73035	8.32443	10.8454	8.04304
	AC5u0009GL001958	673.79	774.176	716.836	786.076	562.275	532.885	605.345	603.819
	AC5u0009GL001959	473.815	461.638	632.268	659.371	421.57	416.637	472.48	443.792
	AC5u0009GL001960	357.856	345.451	458.625	498.868	321.253	295.974	367.066	314.641
	AC5u0009GL001961	64.4207	94.1633	44.9584	43.5604	62.5	53.1935	47.8787	45.5097
	AC5u0009GL001962	36.092	48.6917	54.6547	59.576	39.5184	36.8053	38.317	33.4238
	AC5u0009GL001963	51.0042	50.0041	77.7058	69.1965	54.2755	53.7284	50.6946	48.1992
	AC5u0009GL001964	36.9328	43.4289	51.1771	55.0946	40.7982	37.219	41.9725	34.2382
	AC5u0009GL001965	57.4098	56.295	59.1038	55.7738	47.7765	58.0224	43.6033	43.9979
	AC5u0009GL001966	44.0996	69.599	45.4044	51.5372	68.4312	61.0161	56.7583	44.1537
	AC5u0009GL001967	16.2757	18.262	21.7656	23.4912	22.588	20.2015	19.7482	16.6671
	AC5u0009GL001968	108.768	118.952	125.222	118.071	152.384	165.899	168.834	167.902
	AC5u0009GL001969	29.7926	29.3347	34.6886	35.2176	74.6668	65.8445	62.7284	55.3098
	AC5u0009GL001970	36.5536	31.8113	39.2186	31.7756	102.746	97.9745	77.6422	69.7646
	AC5u0009GL001971	36.1875	32.7296	34.0934	37.1151	99.2497	90.1106	70.1264	67.273
	AC5u0009GL001972	28.7522	27.3613	26.7306	33.1411	85.1127	81.579	60.4748	55.2341
	AC5u0009GL001973	19.0157	22.6141	29.7225	22.7721	65.3915	68.9951	76.2294	47.3403
	AC5u0009GL001974	2567.71	2245.97	3471.38	3527.04	5346.55	5390.36	5541.59	4787.25
	AC5u0009GL001975	17.3674	25.1079	26.6323	24.6612	35.3148	35.2811	35.4555	29.9377
	AC5u0009GL001976	24.1283	25.4544	29.3877	30.6617	28.4445	25.7541	34.9561	30.0405
	AC5u0009GL001977	24.9617	31.5844	28.9155	26.4062	39.4025	35.1161	32.4747	31.9891
	AC5u0009GL001978	185.078	341.868	162.103	149.045	224.251	228.141	198.019	218.194
	AC5u0009GL001979	198.865	363.663	197.017	197.761	240.172	241.192	241.335	213.477
	AC5u0009GL001980	251.951	467.932	270.84	275.613	344.527	353.889	354.914	335.535
	AC5u0009GL001981	148.001	266.711	210.726	223.964	216.187	217.171	252.327	254.405
	AC5u0009GL001982	51.8968	66.2805	36.8302	40.3654	80.647	81.0288	83.9697	69.9244
	AC5u0009GL001983	23.0272	23.8358	15.2088	18.7058	42.1237	46.9787	42.3734	37.0637
	AC5u0009GL001984	103.132	118.184	99.1921	86.2856	90.6937	77.6953	87.737	83.5539
	AC5u0009GL001985	5.69455	10.0126	12.6843	7.99722	13.9616	7.27847	44.2266	7.49107
	AC5u0009GL001986	79.8385	89.06	81.9487	85.0747	65.1686	62.5766	80.8911	76.6331
	AC5u0009GL001987	154.186	157.072	180.046	147.523	129.546	111.944	149.896	134.652
	AC5u0009GL001988	75.9158	70.6722	115.381	118.115	135.524	123.333	134.541	119.809
	AC5u0009GL001989	15.1062	13.4674	13.1801	16.5235	10.7309	12.1665	25.2759	18.3995
	AC5u0009GL001990	15.2408	15.88	21.6466	16.3698	11.467	11.6378	26.1415	19.7746
	AC5u0009GL001991	21.9681	18.3122	26.1897	22.0993	22.9633	16.4713	28.1328	21.3272
	AC5u0009GL001992	19.0722	14.0176	20.1121	20.0819	17.4757	17.616	21.2943	18.2391
	AC5u0009GL001993	3.37308	4.5074	6.53866	5.19494	5.78895	7.21672	13.9232	4.45651
	AC5u0009GL001994	29.0261	39.6128	29.326	26.7163	40.9753	38.8467	38.4102	34.4767
	AC5u0009GL001995	30.8713	40.663	25.2669	31.7515	45.4693	46.3352	40.2425	41.3658
	AC5u0009GL001996	156.815	372.457	382.835	379.496	177.217	177.531	346.559	349.396
	AC5u0009GL001997	70.1112	85.2219	104.172	103.46	77.474	73.9527	109.214	104.8
	AC5u0009GL001998	19.9229	30.2629	31.9815	34.3247	44.7813	43.1844	46.043	42.5956
	AC5u0009GL001999	305.67	454.152	268.982	270.511	249.643	285.954	342.01	357.341
	AC5u0009GL002000	62.2333	91.895	101.503	102.531	54.5938	60.1858	56.7563	48.9091
	AC5u0009GL002001	85.5588	104.993	114.984	128.663	74.9037	72.4017	69.5383	64.1522
	AC5u0009GL002002	44.4004	56.0553	44.6297	85.1494	26.7684	33.9773	45.0671	75.1849
	AC5u0009GL002003	994.315	1241.25	1241.35	1303.4	726.199	710.539	733.644	714.683
	AC5u0009GL002004	317.383	370.933	379.876	384.925	208.137	231.655	216.583	244.629
	AC5u0009GL002005	41.0719	40.69	43.0506	45.7047	53.8174	55.3113	46.6671	36.9774
	AC5u0009GL002006	26.7248	22.6732	68.5176	66.8006	72.7357	89.8125	208.885	185.051
	AC5u0009GL002007	4210.38	3612.21	3814.67	3658.08	4772.95	5024.76	4597.87	4963.63
	AC5u0009GL002008	296.661	252.721	212.117	217.915	338.399	345.416	315.352	335.745
	AC5u0009GL002009	16.0602	12.2365	10.2647	10.0868	6.28133	8.85053	9.25217	5.35827
	AC5u0009GL002010	21.3288	16.9529	13.6669	11.8719	6.95872	6.70573	8.62845	5.84881
	AC5u0009GL002011	18.4395	16.2108	18.2609	16.0122	9.3647	7.17298	9.28212	8.48987
	AC5u0009GL002012	15.8339	19.0301	10.8957	15.5656	9.89822	9.82387	10.0893	6.01834
	AC5u0009GL002013	22.2262	22.9267	17.796	18.6935	7.00623	8.35781	14.9177	6.22898
	AC5u0009GL002014	21.1345	31.1996	21.8772	20.1489	18.8536	17.3807	17.4932	17.0365
	AC5u0009GL002077	21.492	26.8136	35.4402	37.6626	30.2411	26.6079	24.0833	30.0787
	AC5u0009GL002078	30.7639	42.5782	46.3856	48.2771	46.2633	35.5721	41.7695	33.5602
	AC5u0009GL002079	28.933	29.4674	44.3997	39.4442	31.1661	26.2262	35.4491	26.2273
	AC5u0009GL002080	116.084	142.759	119.701	111.269	157.289	153.728	164.628	146.897
	AC5u0009GL002081	118.54	141.889	124.372	115.983	151.489	154.18	153.92	152.477
	AC5u0009GL002082	107.244	118.399	114.782	108.459	126.083	139.253	132.451	133.441
	AC5u0009GL002083	124.839	142.004	126.911	131.922	140.81	148.124	158.184	147.794
	AC5u0009GL002084	1749.21	1186.45	1389.55	1438.94	988.138	922.198	829.925	806.055
	AC5u0009GL002085	238.385	178.582	222.197	230.997	155.395	165.124	169.545	164.011
	AC5u0009GL002086	33.9455	88.8647	16.5756	18.7156	12.833	9.22241	15.3697	9.49178
	AC5u0009GL002087	173.75	202.532	142.255	137.189	131.84	116.496	122.397	121.56
	AC5u0009GL002088	217.385	313.679	249.144	262.346	138.503	174.253	205.149	234.366
	AC5u0009GL002089	218.559	391.991	146.976	152.652	159.978	146.064	134.781	139.104
	AC5u0009GL002090	61.536	45.9147	167.786	200.102	52.3864	49.0957	143.97	124.998
	AC5u0009GL002091	8.59113	14.8108	32.5835	28.0145	12.9902	16.3837	23.4163	23.6576
	AC5u0009GL002092	30.6996	41.8135	46.9907	55.4381	29.0434	29.7472	40.5937	41.148
	AC5u0009GL002093	14.0408	14.4784	29.2287	28.4359	26.8443	20.2048	30.8223	22.697
	AC5u0009GL002094	21.6088	22.4925	35.6961	34.2714	32.9985	26.2262	36.5483	31.1449
	AC5u0009GL002095	43.3648	90.7601	53.1133	41.9438	44.9695	44.1919	65.8386	68.1717
	AC5u0009GL002096	57.3391	112.502	79.5286	77.3342	43.5943	42.9156	79.109	75.5568
	AC5u0009GL002097	56.0611	108.003	88.0058	87.5025	46.7152	50.6923	85.5948	71.7936
	AC5u0009GL002098	75.5384	131.71	105.023	101.449	59.3283	58.1012	98.4225	83.1677
	AC5u0009GL002099	16.9029	39.7165	26.2257	33.9882	18.837	22.4156	31.4561	21.8399
	AC5u0009GL002100	12.1335	31.3817	16.989	25.2667	11.1042	13.2463	19.9653	18.021
	AC5u0009GL002101	159.118	292.45	154.8	147.104	108.741	106.084	148.618	129.526
	AC5u0009GL002102	165.258	212.633	136.616	135.095	224.939	215.614	196.154	192.306
	AC5u0009GL002103	5077.59	4821.65	4358.61	4082.42	5506.73	7173.78	5966.82	10944.6
	AC5u0009GL002104	5245.73	6745.32	4768.81	4312.27	5042.73	6434.88	6095.1	8625.16
	AC5u0009GL002105	566.735	740.908	519.481	495.037	475.379	463.636	488.53	462.693
	AC5u0009GL002106	85.9337	78.5729	82.214	83.8548	94.3989	92.8313	94.3269	83.8773
	AC5u0009GL002107	382.697	389.708	487.118	464.279	565.192	613.111	666.224	701.061
	AC5u0009GL002108	102.275	168.969	94.1957	97.9071	118.279	118.604	109.659	116.017
	AC5u0009GL002109	155.479	231.446	68.0809	68.5943	293.051	261.162	152.944	143.707
	AC5u0009GL002110	100.265	149.929	44.2847	46.1524	176.48	145.996	107.63	105.565
	AC5u0009GL002111	94.7177	72.0817	69.6978	73.0313	15.8637	15.8926	13.8286	10.2653
	AC5u0009GL002112	70.4726	55.5969	49.0248	56.5612	9.64447	11.2507	10.4501	8.28681
	AC5u0009GL002114	216.664	269.723	592.208	630.089	76.7558	90.8348	338.619	313.685
	AC5u0009GL002115	95.1877	74.1316	145.856	137.055	109.968	115.301	144.249	149.496
	AC5u0009GL002116	108.533	88.8071	161.725	164.72	136.732	141.803	172.022	175.314
	AC5u0009GL002117	16.17	15.2631	29.05	33.4653	20.1204	22.0983	26.7753	24.2771
	AC5u0009GL002118	27.6593	25.3734	47.5104	40.1947	34.7491	25.9631	38.1374	44.7765
	AC5u0009GL002119	196.092	178.343	351.568	346.324	230.063	226.611	220.121	194.059
	AC5u0009GL002120	237.716	199.555	435.541	442.602	312.749	254.462	272.43	263.371
	AC5u0009GL002121	337.606	316.969	682.897	703.489	350.179	359.177	378.383	387.255
	AC5u0009GL002178	153.775	177.709	115.543	109.677	116.74	121.167	133.399	136.746
	AC5u0009GL002179	50.1442	49.7738	83.4941	85.5947	55.1601	55.3893	89.1273	76.4993
	AC5u0009GL002180	1057.38	1635.29	1104.44	974.482	618.448	819.27	990.905	1357.57
	AC5u0009GL002181	101.272	123.266	78.4706	74.1852	62.3593	58.2028	66.1077	62.1263
	AC5u0009GL002182	88.9706	127.052	70.518	66.277	56.5515	55.1423	65.0908	55.9224
	AC5u0009GL002183	104.259	119.551	108.468	102.295	81.1221	78.2673	77.1858	61.7657
	AC5u0009GL002184	166.993	171.462	214.336	219.904	240.495	224.225	216.727	212.465
	AC5u0009GL002185	3079.05	4099.3	2504.64	3047.91	61.1417	67.9065	40.1933	48.7349
	AC5u0009GL002186	6683.48	8949.47	5981.05	6972.99	117.242	119.944	71.6727	68.3301
	AC5u0009GL002187	90.538	100.572	209.573	222.056	118.383	129.974	184.343	168.099
	AC5u0009GL002188	34.269	30.6813	95.3896	115.96	33.8711	30.973	85.2795	79.389
	AC5u0009GL002189	37.4502	32.6655	95.9289	113.936	36.7787	37.4201	96.2301	77.0262
	AC5u0009GL002190	34.4528	33.9147	82.6647	101.368	43.4668	36.2424	95.8745	73.4364
	AC5u0009GL002193	228.386	234.936	334.141	334.327	171.969	170.615	182.632	173.367
	AC5u0009GL002194	169.953	193.542	174.019	170.153	120.793	121.296	128.572	115.626
	AC5u0009GL002195	15.0651	12.9079	15.1661	14.2613	17.6304	16.5578	19.7011	12.8768
	AC5u0009GL002196	1320.25	971.223	1349.57	1341.95	792.965	829.222	1061.16	941.078
	AC5u0009GL000152	18.5608	18.8771	29.1397	23.6725	21.1598	22.0144	25.5869	26.373
	AC5u0009GL000153	30.1191	31.1978	39.5286	34.9286	32.4516	37.7007	33.5697	37.5545
	AC5u0009GL000154	40.2345	57.0687	47.8129	51.9765	83.7617	81.245	69.237	69.5311
	AC5u0009GL000155	486.097	501.794	511.184	514.355	627.222	589.94	641.997	629.319
	AC5u0009GL000156	8.14622	6.99508	16.7653	13.5953	6.96713	3.75845	11.0622	10.0119
	AC5u0009GL000157	8.28337	9.11858	17.4838	21.8091	11.5797	13.7015	19.4344	17.2162
	AC5u0009GL000158	56.8941	69.2551	59.9761	63.3299	59.4133	63.7397	63.2711	71.2785
	AC5u0009GL000159	36.879	37.2531	56.6415	48.8719	57.2393	53.727	68.1295	54.3555
	AC5u0009GL000160	26.6625	28.2594	75.8419	77.4992	87.1559	86.6574	236.819	212.272
	AC5u0009GL000161	2840.14	3666.65	1410.03	1491.36	1918.66	1778.04	1651.27	1650.3
	AC5u0009GL000213	9.90942	17.4617	9.36141	9.9556	23.5707	19.3162	16.4447	13.7332
	AC5u0009GL000214	187.067	268.75	65.9813	75.5667	107.625	103.793	58.6938	52.5318
	AC5u0009GL000215	1306.76	1224.05	2670.74	2618.62	1358.84	1364.59	1665.67	1561.4
	AC5u0009GL000216	3222.82	5705.13	2986.71	2944.3	1939.86	2906.85	3299.11	5945.37
	AC5u0009GL000218	222.515	188.918	230.428	191.728	286.344	243.95	258.471	228.077
	AC5u0009GL000219	11.854	24.4155	11.7748	15.3987	19.1281	13.8336	13.3549	15.4241
	AC5u0009GL000277	3005.76	2175.88	3679.64	3758.36	317.107	297.98	476.331	423.905
	AC5u0009GL000278	20.6062	60.9851	17.8335	12.2357	15.258	12.9114	14.8978	18.4378
	AC5u0009GL000279	81.1338	95.6843	79.2599	85.9901	94.9387	94.6834	107.092	104.647
	AC5u0009GL000280	1311.43	1243.65	1270.59	1179.98	1518.79	1356.53	1374.31	1330.28
	AC5u0009GL000281	991.815	939.579	953.159	869.871	1098.33	937.957	1008.73	1021.55
	AC5u0009GL000282	1526.06	1491.09	1334.69	1401.85	1154.55	1176.99	1068.04	1175.2
	AC5u0009GL000283	27.6593	49.1249	12.8362	15.4883	39.5476	39.633	26.2602	21.8671
	AC5u0009GL000284	46.4589	109.195	16.9374	21.455	69.0243	65.0612	45.903	35.038
	AC5u0009GL000285	134.115	172.362	149.629	160.456	199.723	193.295	167.402	166.299
	AC5u0009GL000286	31.2867	37.6702	29.6652	33.3196	40.4974	39.5543	47.9322	40.5735
	AC5u0009GL000348	46.3183	66.6959	60.222	71.6449	54.8965	57.3839	64.9748	58.269
	AC5u0009GL000392	348.046	528.608	126.272	148.667	182.316	189.187	108.291	94.1269

## Sheet: Table S7
	Table S7 COGs functional classification.
	First class	Second class	Gene ID	COGs ID	Description
	Metabolism	1.Amino acid transport and metabolism	AC5u0009GL000002	COG0531	Amino acid transporter
			AC5u0009GL000040	COG0006	Xaa-Pro aminopeptidase
			AC5u0009GL000053	COG0436	Aspartate/methionine/tyrosine aminotransferase
			AC5u0009GL000054	COG0436	Aminotransferase
			AC5u0009GL000055	COG0436	Aspartate/methionine/tyrosine aminotransferase
			AC5u0009GL000057	COG0174	Glutamine synthetase
			AC5u0009GL000082	COG0531	Amino acid transporter
			AC5u0009GL000683	COG1104	Cysteine sulfinate desulfinase/cysteine desulfurase or related enzyme
			AC5u0009GL000686	COG0531	Amino acid transporter
			AC5u0009GL000687	COG0531	Amino acid transporter
			AC5u0009GL000688	COG0076	Glutamate or tyrosine decarboxylase or a related PLP-dependent protein
			AC5u0009GL000689	COG0076	Glutamate or tyrosine decarboxylase or a related PLP-dependent protein
			AC5u0009GL000695	COG0028	Belongs to the TPP enzyme family
			AC5u0009GL000696	COG0028	Belongs to the TPP enzyme family
			AC5u0009GL000697	COG0028	Belongs to the TPP enzyme family
			AC5u0009GL000698	COG0028	Acetolactate synthase large subunit or other thiamine pyrophosphate-requiring enzyme
			AC5u0009GL000699	COG0028	Belongs to the TPP enzyme family
			AC5u0009GL001033	COG0493	NADPH-dependent glutamate synthase beta chain or related oxidoreductase
			AC5u0009GL001042	COG1113	L-asparagine transporter and related permeases
			AC5u0009GL001051	COG0624	Acetylornithine deacetylase/Succinyl-diaminopimelate desuccinylase or related deacylase
			AC5u0009GL001347	COG1104	Cysteine sulfinate desulfinase/cysteine desulfurase or related enzyme
			AC5u0009GL001354	COG0253	Diaminopimelate epimerase
			AC5u0009GL001355	COG0527	Aspartokinase
			AC5u0009GL001356	COG0019	Diaminopimelate decarboxylase
			AC5u0009GL001357	COG2171	Tetrahydrodipicolinate N-succinyltransferase
			AC5u0009GL001359	COG0329	Dihydrodipicolinate synthase/N-acetylneuraminate lyase
			AC5u0009GL001360	COG0289	Dihydrodipicolinate reductase
			AC5u0009GL001361	COG0436	Aspartate/methionine/tyrosine aminotransferase
			AC5u0009GL001362	COG0136	Aspartate-semialdehyde dehydrogenase
			AC5u0009GL001547	COG1247	L-amino acid N-acyltransferase YncA
			AC5u0009GL001563	COG2755	Lysophospholipase L1 or related esterase
			AC5u0009GL001588	COG2195	Di- or tripeptidase
			AC5u0009GL001591	COG0436	Aspartate/methionine/tyrosine aminotransferase
			AC5u0009GL001603	COG0165	Argininosuccinate lyase
			AC5u0009GL001604	COG0137	Argininosuccinate synthase
			AC5u0009GL001760	COG0520	Selenocysteine lyase/Cysteine desulfurase
			AC5u0009GL001902	COG0079	Aminotransferase class I and II
			AC5u0009GL001906	COG4917	Ethanolamine utilization protein EutP, contains a P-loop NTPase domain
			AC5u0009GL001910	COG4810	Ethanolamine utilization protein EutS, ethanolamine utilization microcompartment shell protein
			AC5u0009GL001926	COG4816	Ethanolamine utilization protein EutL, ethanolamine utilization microcompartment shell protein
			AC5u0009GL001929	COG4820	Ethanolamine utilization protein EutJ, possible chaperonin
			AC5u0009GL002029	COG2755	Lysophospholipase L1 or related esterase
			AC5u0009GL002042	COG1897	Transfers an acetyl group from acetyl-CoA to
			AC5u0009GL002043	COG0031	Cysteine synthase
			AC5u0009GL002064	COG1114	Branched-chain amino acid permeases
			AC5u0009GL000097	COG0509	Glycine cleavage system H protein (lipoate-binding)
			AC5u0009GL000116	COG0112	Glycine/serine hydroxymethyltransferase
			AC5u0009GL000124	COG0531	Amino acid transporter
			AC5u0009GL000125	COG0531	Amino acid transporter
			AC5u0009GL000127	COG2235	Arginine deiminase
			AC5u0009GL000143	COG0549	Carbamate kinase
			AC5u0009GL000144	COG0078	Ornithine carbamoyltransferase
			AC5u0009GL000164	COG0765	ABC-type amino acid transport system, permease component
			AC5u0009GL000165	COG1126	ABC-type polar amino acid transport system, ATPase component
			AC5u0009GL000178	COG4690	Dipeptidase
			AC5u0009GL000242	COG0697	EamA-like transporter family
			AC5u0009GL000367	COG2066	Glutaminase
			AC5u0009GL000400	COG2071	Gamma-glutamyl-gamma-aminobutyrate hydrolase PuuD (putrescine degradation), contains GATase1-like domain
			AC5u0009GL000419	COG0436	Aspartate/methionine/tyrosine aminotransferase
			AC5u0009GL000423	COG1387	Histidinol phosphatase or related hydrolase of the PHP family
			AC5u0009GL000434	COG0531	Amino acid transporter
			AC5u0009GL000437	COG0620	Methionine synthase II (cobalamin-independent)
			AC5u0009GL000446	COG3579	Aminopeptidase C
			AC5u0009GL000448	COG0308	Aminopeptidase N
			AC5u0009GL000452	COG2502	Asparagine synthetase A
			AC5u0009GL000573	COG0367	Asparagine synthetase B (glutamine-hydrolyzing)
			AC5u0009GL000578	COG1247	L-amino acid N-acyltransferase YncA
			AC5u0009GL000606	COG0160	4-aminobutyrate aminotransferase or related aminotransferase
			AC5u0009GL000607	COG0531	Amino acid transporter
			AC5u0009GL000613	COG1135	ABC-type methionine transport system, ATPase component
			AC5u0009GL000614	COG2011	ABC-type methionine transport system, permease component
			AC5u0009GL000615	COG0624	Acetylornithine deacetylase/Succinyl-diaminopimelate desuccinylase or related deacylase
			AC5u0009GL000711	COG3104	Dipeptide/tripeptide permease
			AC5u0009GL000726	COG0626	Cystathionine beta-lyase/cystathionine gamma-synthase
			AC5u0009GL000727	COG0765	ABC-type amino acid transport system, permease component
			AC5u0009GL000728	COG1126	ABC-type polar amino acid transport system, ATPase component
			AC5u0009GL000729	COG0834	ABC-type amino acid transport/signal transduction system, periplasmic component/domain
			AC5u0009GL000730	COG3579	Aminopeptidase C
			AC5u0009GL000776	COG0345	Pyrroline-5-carboxylate reductase
			AC5u0009GL000777	COG0014	Gamma-glutamyl phosphate reductase
			AC5u0009GL000778	COG0263	Glutamate 5-kinase
			AC5u0009GL000780	COG0436	Aspartate/methionine/tyrosine aminotransferase
			AC5u0009GL000799	COG0624	Acetylornithine deacetylase/Succinyl-diaminopimelate desuccinylase or related deacylase
			AC5u0009GL000800	COG0834	ABC-type amino acid transport/signal transduction system, periplasmic component/domain
			AC5u0009GL000807	COG0531	Amino acid transporter
			AC5u0009GL000868	COG1113	L-asparagine transporter and related permeases
			AC5u0009GL000901	COG0083	Homoserine kinase
			AC5u0009GL000902	COG0460	Homoserine dehydrogenase
			AC5u0009GL000903	COG0498	Threonine synthase
			AC5u0009GL000907	COG0028	Acetolactate synthase large subunit or other thiamine pyrophosphate-requiring enzyme
			AC5u0009GL000914	COG1174	ABC-type proline/glycine betaine transport system, permease component
			AC5u0009GL000915	COG1125	ABC-type proline/glycine betaine transport system, ATPase component
			AC5u0009GL000916	COG1174	ABC-type proline/glycine betaine transport system, permease component
			AC5u0009GL000946	COG0531	Amino acid transporter
			AC5u0009GL000990	COG2755	Lysophospholipase L1 or related esterase
			AC5u0009GL001157	COG0531	Amino acid transporter
			AC5u0009GL001158	COG0531	Amino acid transporter
			AC5u0009GL001159	COG0436	Aspartate/methionine/tyrosine aminotransferase
			AC5u0009GL001182	COG0458	Carbamoylphosphate synthase large subunit
			AC5u0009GL001183	COG0505	Carbamoylphosphate synthase small subunit
			AC5u0009GL001194	COG0531	Amino acid transporter
			AC5u0009GL001196	COG1114	Branched-chain amino acid permeases
			AC5u0009GL001222	COG0833	Amino acid permease
			AC5u0009GL001233	COG1126	ABC-type polar amino acid transport system, ATPase component
			AC5u0009GL001234	COG0834	ABC-type amino acid transport/signal transduction system, periplasmic component/domain
			AC5u0009GL001235	COG0765	ABC-type amino acid transport system, permease component
			AC5u0009GL001236	COG0765	ABC-type amino acid transport system, permease component
			AC5u0009GL001436	COG0624	Acetylornithine deacetylase/Succinyl-diaminopimelate desuccinylase or related deacylase
			AC5u0009GL001444	COG0031	Cysteine synthase
			AC5u0009GL001471	COG1760	L-serine deaminase
			AC5u0009GL001472	COG1760	L-serine deaminase
			AC5u0009GL001475	COG4690	Dipeptidase
			AC5u0009GL001487	COG4690	Dipeptidase
			AC5u0009GL001499	COG4392	Branched-chain amino acid transport protein
			AC5u0009GL001500	COG1296	Predicted branched-chain amino acid permease (azaleucine resistance)
			AC5u0009GL001519	COG0346	Glyoxalase-like domain
			AC5u0009GL001520	COG0345	Pyrroline-5-carboxylate reductase
			AC5u0009GL001529	COG0505	Carbamoylphosphate synthase small subunit
			AC5u0009GL001627	COG4690	Dipeptidase
			AC5u0009GL001664	COG1113	L-asparagine transporter and related permeases
			AC5u0009GL001666	COG1126	ABC-type polar amino acid transport system, ATPase component
			AC5u0009GL001667	COG0765	ABC-type amino acid transport system, permease component
			AC5u0009GL001683	COG0834	ABC-type amino acid transport/signal transduction system, periplasmic component/domain
			AC5u0009GL001684	COG0765	ABC-type amino acid transport system, permease component
			AC5u0009GL001685	COG1126	ABC-type polar amino acid transport system, ATPase component
			AC5u0009GL001802	COG0531	Amino acid transporter
			AC5u0009GL001803	COG0531	Amino acid transporter
			AC5u0009GL001813	COG4690	Dipeptidase
			AC5u0009GL001825	COG1687	Branched-chain amino acid transport protein AzlD
			AC5u0009GL001826	COG1296	Predicted branched-chain amino acid permease (azaleucine resistance)
			AC5u0009GL001834	COG0531	Amino acid
			AC5u0009GL001835	COG0531	Amino acid transporter
			AC5u0009GL001852	COG1063	Threonine dehydrogenase or related Zn-dependent dehydrogenase
			AC5u0009GL001873	COG1113	L-asparagine transporter and related permeases
			AC5u0009GL001954	COG0531	Amino acid transporter
			AC5u0009GL001956	COG0436	Aspartate/methionine/tyrosine aminotransferase
			AC5u0009GL002080	COG0687	Spermidine/putrescine-binding periplasmic protein
			AC5u0009GL002081	COG1177	ABC-type spermidine/putrescine transport system, permease component II
			AC5u0009GL002082	COG1176	ABC-type spermidine/putrescine transport system, permease component I
			AC5u0009GL002083	COG3842	ABC-type Fe3+/spermidine/putrescine transport systems, ATPase components
			AC5u0009GL000219	COG0833	Amino acid
			AC5u0009GL000286	COG0697	EamA-like transporter family
		2. Carbohydrate transport and metabolism	AC5u0009GL000019	COG0036	Pentose-5-phosphate-3-epimerase
			AC5u0009GL000061	COG1940	Sugar kinase of the NBD/HSP70 family, may contain an N-terminal HTH domain
			AC5u0009GL001025	COG2814	Predicted arabinose efflux permease, MFS family
			AC5u0009GL001044	COG2814	Predicted arabinose efflux permease, MFS family
			AC5u0009GL001057	COG0524	Sugar or nucleoside kinase, ribokinase family
			AC5u0009GL001322	COG2706	6-phosphogluconolactonase, cycloisomerase 2 family
			AC5u0009GL001350	COG0406	Broad specificity phosphatase PhoE
			AC5u0009GL001364	COG2610	H+/gluconate symporter or related permease
			AC5u0009GL001365	COG1929	Glycerate kinase
			AC5u0009GL001379	COG0483	Archaeal fructose-1,6-bisphosphatase or related enzyme of inositol monophosphatase family
			AC5u0009GL001541	COG2610	H+/gluconate symporter or related permease
			AC5u0009GL001543	COG1070	Sugar (pentulose or hexulose) kinase
			AC5u0009GL001556	COG2017	Galactose mutarotase or related enzyme
			AC5u0009GL001585	COG0469	Pyruvate kinase
			AC5u0009GL001733	COG0697	Permease of the drug/metabolite transporter (DMT) superfamily
			AC5u0009GL001744	COG3345	Alpha-galactosidase
			AC5u0009GL001746	COG1940	Sugar kinase of the NBD/HSP70 family, may contain an N-terminal HTH domain
			AC5u0009GL001770	COG2271	Sugar phosphate permease
			AC5u0009GL001876	COG0406	Belongs to the phosphoglycerate mutase family
			AC5u0009GL001908	COG0406	Phosphoglycerate mutase
			AC5u0009GL001930	COG0580	Glycerol uptake facilitator and related aquaporins (Major Intrinsic Protein Family)
			AC5u0009GL001932	COG1082	Sugar phosphate isomerase/epimerase
			AC5u0009GL001937	COG0702	Epimerase
			AC5u0009GL002016	COG0364	Glucose-6-phosphate 1-dehydrogenase
			AC5u0009GL002017	COG0362	6-phosphogluconate dehydrogenase
			AC5u0009GL002019	COG2190	Phosphotransferase system IIA component
			AC5u0009GL002027	COG4468	Galactose-1-phosphate uridylyltransferase
			AC5u0009GL002028	COG0153	Galactokinase
			AC5u0009GL002047	COG2814	Predicted arabinose efflux permease, MFS family
			AC5u0009GL000114	COG1080	Phosphoenolpyruvate-protein kinase (PTS system EI component in bacteria)
			AC5u0009GL000142	COG0697	Permease of the drug/metabolite transporter (DMT) superfamily
			AC5u0009GL000146	COG1070	Belongs to the FGGY kinase family
			AC5u0009GL000149	COG0166	Glucose-6-phosphate isomerase
			AC5u0009GL000151	COG4975	Glucose uptake protein GlcU
			AC5u0009GL000167	COG3001	Fructosamine-3-kinase
			AC5u0009GL000238	COG1621	Belongs to the glycosyl hydrolase 68 family
			AC5u0009GL000274	COG1501	Alpha-glucosidase, glycosyl hydrolase family GH31
			AC5u0009GL000354	COG1455	The phosphoenolpyruvate-dependent sugar phosphotransferase system (PTS), a major carbohydrate active - transport system, catalyzes the phosphorylation of incoming sugar substrates concomitant with their translocation across the cell membrane
			AC5u0009GL000357	COG1080	Phosphoenolpyruvate-protein kinase (PTS system EI component in bacteria)
			AC5u0009GL000358	COG1653	Right handed beta helix region
			AC5u0009GL000359	COG0149	Triosephosphate isomerase
			AC5u0009GL000360	COG0191	Fructose/tagatose bisphosphate aldolase
			AC5u0009GL000361	COG0406	Broad specificity phosphatase PhoE
			AC5u0009GL000407	COG0637	Beta-phosphoglucomutase or related phosphatase, HAD superfamily
			AC5u0009GL000408	COG1554	Trehalose and maltose hydrolase (possible phosphorylase)
			AC5u0009GL000409	COG2211	Na+/melibiose symporter or related transporter
			AC5u0009GL000445	COG2814	Predicted arabinose efflux permease, MFS family
			AC5u0009GL000552	COG2814	Predicted arabinose efflux permease, MFS family
			AC5u0009GL000610	COG2814	Predicted arabinose efflux permease, MFS family
			AC5u0009GL000714	COG2814	Predicted arabinose efflux permease, MFS family
			AC5u0009GL000721	COG3250	Beta-galactosidase/beta-glucuronidase
			AC5u0009GL000722	COG3250	Beta-galactosidase/beta-glucuronidase
			AC5u0009GL000724	COG0588	Phosphoglycerate mutase (BPG-dependent)
			AC5u0009GL000731	COG0120	Ribose 5-phosphate isomerase
			AC5u0009GL000802	COG1109	Phosphomannomutase
			AC5u0009GL000809	COG0391	Archaeal 2-phospho-L-lactate transferase/Bacterial gluconeogenesis factor, CofD/UPF0052 family
			AC5u0009GL000881	COG2814	Predicted arabinose efflux permease, MFS family
			AC5u0009GL000888	COG0588	Phosphoglycerate mutase (BPG-dependent)
			AC5u0009GL000920	COG0702	NAD(P)H-binding
			AC5u0009GL000923	COG1015	Metalloenzyme superfamily
			AC5u0009GL000933	COG3345	Alpha-galactosidase
			AC5u0009GL000936	COG0149	Triosephosphate isomerase
			AC5u0009GL000945	COG0477	Sugar (and other) transporter
			AC5u0009GL000959	COG0406	Broad specificity phosphatase PhoE
			AC5u0009GL000963	COG0697	Phosphoglycerate mutase
			AC5u0009GL000982	COG0524	Sugar or nucleoside kinase, ribokinase family
			AC5u0009GL000983	COG1869	D-ribose pyranose/furanose isomerase RbsD
			AC5u0009GL000984	COG0738	Fucose permease
			AC5u0009GL000987	COG1109	Phosphomannomutase
			AC5u0009GL001103	COG2814	Predicted arabinose efflux permease, MFS family
			AC5u0009GL001110	COG2301	Citrate lyase beta subunit
			AC5u0009GL001115	COG0471	Di- and tricarboxylate transporter
			AC5u0009GL001122	COG1064	D-arabinose 1-dehydrogenase, Zn-dependent alcohol dehydrogenase family
			AC5u0009GL001126	COG4193	Beta- N-acetylglucosaminidase
			AC5u0009GL001137	COG1482	MucBP domain
			AC5u0009GL001142	COG1925	Phosphotransferase system, HPr and related phosphotransfer proteins
			AC5u0009GL001143	COG1080	Phosphoenolpyruvate-protein kinase (PTS system EI component in bacteria)
			AC5u0009GL001148	COG4193	domain, Protein
			AC5u0009GL001151	COG1216	Glycosyltransferase, GT2 family
			AC5u0009GL001180	COG0366	Glycosidase
			AC5u0009GL001181	COG2211	Na+/melibiose symporter or related transporter
			AC5u0009GL001184	COG2211	Na+/melibiose symporter or related transporter
			AC5u0009GL001197	COG1940	Sugar kinase of the NBD/HSP70 family, may contain an N-terminal HTH domain
			AC5u0009GL001206	COG2814	Predicted arabinose efflux permease, MFS family
			AC5u0009GL001207	COG3775	Phosphotransferase system, galactitol-specific IIC component
			AC5u0009GL001241	COG2814	Predicted arabinose efflux permease, MFS family
			AC5u0009GL001274	COG0406	Belongs to the phosphoglycerate mutase family
			AC5u0009GL001275	COG0363	6-phosphogluconolactonase/Glucosamine-6-phosphate isomerase/deaminase
			AC5u0009GL001289	COG1064	D-arabinose 1-dehydrogenase, Zn-dependent alcohol dehydrogenase family
			AC5u0009GL001309	COG3405	Glycosyl hydrolases family 8
			AC5u0009GL001430	COG2017	Catalyzes the interconversion of alpha and beta anomers of maltose
			AC5u0009GL001434	COG0366	Glycosidase
			AC5u0009GL001435	COG2814	Predicted arabinose efflux permease, MFS family
			AC5u0009GL001464	COG2814	Predicted arabinose efflux permease, MFS family
			AC5u0009GL001483	COG0406	Broad specificity phosphatase PhoE
			AC5u0009GL001507	COG1015	Phosphopentomutase
			AC5u0009GL001624	COG3957	Phosphoketolase
			AC5u0009GL001671	COG0765	Glycogen synthase
			AC5u0009GL001680	COG1064	D-arabinose 1-dehydrogenase, Zn-dependent alcohol dehydrogenase family
			AC5u0009GL001687	COG0524	pfkB family carbohydrate kinase
			AC5u0009GL001691	COG2849	domain, Protein
			AC5u0009GL001692	COG2849	domain, Protein
			AC5u0009GL001695	COG0366	Glycosidase
			AC5u0009GL001696	COG0366	Glycosidase
			AC5u0009GL001702	COG0366	Glycosyl hydrolase family 70
			AC5u0009GL001709	COG2814	Predicted arabinose efflux permease, MFS family
			AC5u0009GL001858	COG1064	D-arabinose 1-dehydrogenase, Zn-dependent alcohol dehydrogenase family
			AC5u0009GL001869	COG0057	Glyceraldehyde-3-phosphate dehydrogenase/erythrose-4-phosphate dehydrogenase
			AC5u0009GL001870	COG0126	3-phosphoglycerate kinase
			AC5u0009GL001871	COG0149	Triosephosphate isomerase
			AC5u0009GL001872	COG0148	Enolase
			AC5u0009GL001977	COG2814	Predicted arabinose efflux permease, MFS family
			AC5u0009GL002012	COG1482	mannose-6-phosphate isomerase
			AC5u0009GL002013	COG1482	mannose-6-phosphate isomerase
			AC5u0009GL002111	COG0366	Glycosidase
			AC5u0009GL002112	COG2211	Na+/melibiose symporter or related transporter
			AC5u0009GL000154	COG0477	MFS family permease
		3. Coenzyme transport and metabolism	AC5u0009GL000018	COG1564	Thiamine pyrophosphokinase
			AC5u0009GL000026	COG0452	Phosphopantothenoylcysteine synthetase/decarboxylase
			AC5u0009GL000033	COG0142	Geranylgeranyl pyrophosphate synthase
			AC5u0009GL000036	COG0190	5,10-methylene-tetrahydrofolate dehydrogenase/Methenyl tetrahydrofolate cyclohydrolase
			AC5u0009GL000065	COG0212	5-formyltetrahydrofolate cyclo-ligase
			AC5u0009GL000087	COG2226	Ubiquinone/menaquinone biosynthesis C-methylase UbiE
			AC5u0009GL000090	COG1057	Nicotinic acid mononucleotide adenylyltransferase
			AC5u0009GL000674	COG0285	Folylpolyglutamate synthase/Dihydropteroate synthase
			AC5u0009GL000682	COG0301	Adenylyl- and sulfurtransferase ThiI, participates in tRNA 4-thiouridine and thiamine biosynthesis
			AC5u0009GL001046	COG0192	S-adenosylmethionine synthetase
			AC5u0009GL001062	COG1539	Dihydroneopterin aldolase
			AC5u0009GL001063	COG0801	7,8-dihydro-6-hydroxymethylpterin-pyrophosphokinase
			AC5u0009GL001064	COG0302	GTP cyclohydrolase I
			AC5u0009GL001065	COG0285	Folylpolyglutamate synthase/Dihydropteroate synthase
			AC5u0009GL001323	COG2226	Ubiquinone/menaquinone biosynthesis C-methylase UbiE
			AC5u0009GL001384	COG0669	Phosphopantetheine adenylyltransferase
			AC5u0009GL001566	COG0262	Dihydrofolate reductase
			AC5u0009GL001589	COG0327	Putative GTP cyclohydrolase 1 type 2, NIF3 family
			AC5u0009GL001601	COG0340	Biotin-(acetyl-CoA carboxylase) ligase
			AC5u0009GL001602	COG1268	Biotin transporter BioY
			AC5u0009GL001752	COG0561	Hydroxymethylpyrimidine pyrophosphatase and other HAD family phosphatases
			AC5u0009GL001767	COG0447	1,4-Dihydroxy-2-naphthoyl-CoA synthase
			AC5u0009GL001774	COG0054	6,7-dimethyl-8-ribityllumazine synthase (Riboflavin synthase beta chain)
			AC5u0009GL001775	COG0807	GTP cyclohydrolase II
			AC5u0009GL001776	COG0307	Riboflavin synthase alpha chain
			AC5u0009GL001777	COG0117	Pyrimidine deaminase domain of riboflavin biosynthesis protein RibD
			AC5u0009GL001874	COG2038	NaMN:DMB phosphoribosyltransferase
			AC5u0009GL001875	COG1587	Uroporphyrinogen-III synthase
			AC5u0009GL001877	COG0368	Cobalamin synthase
			AC5u0009GL001878	COG2087	Adenosyl cobinamide kinase/adenosyl cobinamide phosphate guanylyltransferase
			AC5u0009GL001879	COG0001	Glutamate-1-semialdehyde aminotransferase
			AC5u0009GL001880	COG0113	Delta-aminolevulinic acid dehydratase, porphobilinogen synthase
			AC5u0009GL001881	COG0181	Porphobilinogen deaminase
			AC5u0009GL001882	COG0373	Glutamyl-tRNA reductase
			AC5u0009GL001883	COG1648	Putative NAD(P)-binding
			AC5u0009GL001884	COG1492	Cobyric acid synthase
			AC5u0009GL001886	COG0619	Energy-coupling factor transporter transmembrane protein EcfT
			AC5u0009GL001889	COG2243	Precorrin-2 methylase
			AC5u0009GL001890	COG4822	Cobalamin biosynthesis protein CbiK, Co2+ chelatase
			AC5u0009GL001891	COG1587	Uroporphyrinogen-III synthase
			AC5u0009GL001892	COG2099	Precorrin-6x reductase
			AC5u0009GL001893	COG1010	Precorrin-3B methylase
			AC5u0009GL001894	COG2073	Cobalamin biosynthesis protein CbiG
			AC5u0009GL001895	COG2875	Precorrin-4 methylase
			AC5u0009GL001896	COG2242	Precorrin-6B methylase 2
			AC5u0009GL001897	COG2241	Precorrin-6B methylase 1
			AC5u0009GL001898	COG1903	Cobalamin biosynthesis protein CbiD
			AC5u0009GL001899	COG2082	Precorrin isomerase
			AC5u0009GL001900	COG1270	Cobalamin biosynthesis protein CobD/CbiB
			AC5u0009GL001901	COG1797	Cobyrinic acid a,c-diamide synthase
			AC5u0009GL001903	COG2096	Cob(I)alamin adenosyltransferase
			AC5u0009GL001915	COG2096	Cob(I)alamin adenosyltransferase
			AC5u0009GL002036	COG3201	Nicotinamide riboside transporter PnuC
			AC5u0009GL000185	COG0196	FAD synthase
			AC5u0009GL000226	COG0511	Biotin carboxyl carrier protein
			AC5u0009GL000249	COG0476	Molybdopterin or thiamine biosynthesis adenylyltransferase
			AC5u0009GL000250	COG0521	Molybdopterin biosynthesis enzyme MoaB
			AC5u0009GL000251	COG0303	Molybdopterin biosynthesis enzyme
			AC5u0009GL000252	COG1763	Molybdopterin-guanine dinucleotide biosynthesis protein
			AC5u0009GL000253	COG0746	Transfers a GMP moiety from GTP to Mo-molybdopterin (Mo- MPT) cofactor (Moco or molybdenum cofactor) to form Mo- molybdopterin guanine dinucleotide (Mo-MGD) cofactor
			AC5u0009GL000259	COG0142	geranyltranstransferase activity
			AC5u0009GL000261	COG1977	Molybdopterin converting factor, small subunit
			AC5u0009GL000262	COG0314	Molybdopterin synthase catalytic subunit
			AC5u0009GL000269	COG2145	Hydroxyethylthiazole kinase, sugar kinase family
			AC5u0009GL000270	COG0351	Hydroxymethylpyrimidine/phosphomethylpyrimidine kinase
			AC5u0009GL000271	COG0352	Thiamine monophosphate synthase
			AC5u0009GL000318	COG0619	Energy-coupling factor transporter transmembrane protein EcfT
			AC5u0009GL000345	COG1488	Nicotinic acid phosphoribosyltransferase
			AC5u0009GL000346	COG1335	Nicotinamidase-related amidase
			AC5u0009GL000401	COG2918	Belongs to the glutamate--cysteine ligase type 1 family
			AC5u0009GL000435	COG1893	Ketopantoate reductase
			AC5u0009GL000480	COG1985	RibD C-terminal domain
			AC5u0009GL000579	COG0095	Lipoate-protein ligase A
			AC5u0009GL000581	COG0561	Hydroxymethylpyrimidine pyrophosphatase and other HAD family phosphatases
			AC5u0009GL000718	COG1488	Nicotinic acid phosphoribosyltransferase
			AC5u0009GL000719	COG0171	NH3-dependent NAD+ synthetase
			AC5u0009GL000781	COG1893	Ketopantoate reductase
			AC5u0009GL000849	COG0285	Belongs to the folylpolyglutamate synthase family
			AC5u0009GL000870	COG1154	Deoxyxylulose-5-phosphate synthase
			AC5u0009GL000878	COG0661	Predicted unusual protein kinase regulating ubiquinone biosynthesis, AarF/ABC1/UbiB family
			AC5u0009GL000911	COG0108	3,4-dihydroxy-2-butanone 4-phosphate synthase
			AC5u0009GL000965	COG1072	Panthothenate kinase
			AC5u0009GL000992	COG0561	Hydroxymethylpyrimidine pyrophosphatase and other HAD family phosphatases
			AC5u0009GL001108	COG1767	Triphosphoribosyl-dephospho-CoA synthetase
			AC5u0009GL001171	COG2918	Belongs to the glutamate--cysteine ligase type 1 family
			AC5u0009GL001190	COG1477	Thiamine biosynthesis lipoprotein ApbE
			AC5u0009GL001200	COG0095	Lipoate-protein ligase A
			AC5u0009GL001216	COG0619	Energy-coupling factor transporter transmembrane protein EcfT
			AC5u0009GL001218	COG4721	ABC-type thiamine/hydroxymethylpyrimidine transport system, permease component
			AC5u0009GL001301	COG0276	Protoheme ferro-lyase (ferrochelatase)
			AC5u0009GL001463	COG2226	Ubiquinone/menaquinone biosynthesis C-methylase UbiE
			AC5u0009GL001950	COG0315	Molybdenum cofactor biosynthesis enzyme
			AC5u0009GL001952	COG2896	Molybdenum cofactor biosynthesis enzyme MoaA
			AC5u0009GL002178	COG0142	Geranylgeranyl pyrophosphate synthase
			AC5u0009GL002179	COG1575	1,4-dihydroxy-2-naphthoate octaprenyltransferase
		4. Nucleotide transport and metabolism	AC5u0009GL000028	COG0194	Guanylate kinase
			AC5u0009GL000047	COG4508	Dimeric dUTPase, all-alpha-NTP-PPase (MazG) superfamily
			AC5u0009GL000071	COG0572	Uridine kinase
			AC5u0009GL000690	COG2252	Xanthine/uracil/vitamin C permease, AzgA family
			AC5u0009GL000691	COG2252	Xanthine/uracil/vitamin C permease, AzgA family
			AC5u0009GL001026	COG1328	Anaerobic ribonucleoside-triphosphate reductase
			AC5u0009GL001034	COG1146	NAD-dependent dihydropyrimidine dehydrogenase, PreA subunit
			AC5u0009GL001050	COG0063	NAD(P)H-hydrate repair enzyme Nnr, NAD(P)H-hydrate dehydratase domain
			AC5u0009GL001054	COG1428	Deoxyadenosine/deoxycytidine kinase
			AC5u0009GL001346	COG0775	Nucleoside phosphorylase
			AC5u0009GL001353	COG0462	Phosphoribosylpyrophosphate synthetase
			AC5u0009GL001387	COG2131	Deoxycytidylate deaminase
			AC5u0009GL001552	COG1051	ADP-ribose pyrophosphatase YjhB, NUDIX family
			AC5u0009GL001567	COG0207	Thymidylate synthase
			AC5u0009GL001574	COG0283	Cytidylate kinase
			AC5u0009GL001728	COG1780	Protein involved in ribonucleotide reduction
			AC5u0009GL001778	COG1957	Inosine-uridine nucleoside N-ribohydrolase
			AC5u0009GL001940	COG1780	Protein involved in ribonucleotide reduction
			AC5u0009GL000111	COG2233	Xanthine/uracil permease
			AC5u0009GL000115	COG0035	Uracil phosphoribosyltransferase
			AC5u0009GL000120	COG1435	Thymidine kinase
			AC5u0009GL000199	COG0528	Uridylate kinase
			AC5u0009GL000255	COG4585	Sensor histidine kinase
			AC5u0009GL000309	COG0563	Adenylate kinase or related kinase
			AC5u0009GL000324	COG0503	Adenine/guanine phosphoribosyltransferase or related PRPP-binding protein
			AC5u0009GL000325	COG0026	Phosphoribosylaminoimidazole carboxylase (NCAIR synthetase)
			AC5u0009GL000344	COG1051	ADP-ribose pyrophosphatase YjhB, NUDIX family
			AC5u0009GL000351	COG0504	CTP synthase (UTP-ammonia lyase)
			AC5u0009GL000376	COG1457	Purine-cytosine permease or related protein
			AC5u0009GL000377	COG0402	Cytosine/adenosine deaminase or related metal-dependent hydrolase
			AC5u0009GL000386	COG0634	Hypoxanthine-guanine phosphoribosyltransferase
			AC5u0009GL000394	COG0104	Adenylosuccinate synthase
			AC5u0009GL000395	COG0516	IMP dehydrogenase/GMP reductase
			AC5u0009GL000405	COG2357	ppGpp synthetase catalytic domain (RelA/SpoT-type nucleotidyltranferase)
			AC5u0009GL000459	COG0518	GMP synthase - Glutamine amidotransferase domain
			AC5u0009GL000557	COG0274	Deoxyribose-phosphate aldolase
			AC5u0009GL000583	COG0462	Phosphoribosylpyrophosphate synthetase
			AC5u0009GL000585	COG0503	Adenine/guanine phosphoribosyltransferase or related PRPP-binding protein
			AC5u0009GL000600	COG0248	Exopolyphosphatase/pppGpp-phosphohydrolase
			AC5u0009GL000603	COG0105	Nucleoside diphosphate kinase
			AC5u0009GL000733	COG0756	dUTPase
			AC5u0009GL000755	COG0208	Ribonucleotide reductase beta subunit, ferritin-like domain
			AC5u0009GL000756	COG0209	Ribonucleotide reductase alpha subunit
			AC5u0009GL000763	COG0125	Thymidylate kinase
			AC5u0009GL000769	COG0248	Exopolyphosphatase
			AC5u0009GL000771	COG0248	Exopolyphosphatase/pppGpp-phosphohydrolase
			AC5u0009GL000803	COG1896	5'-deoxynucleotidase YfbR and related HD superfamily hydrolases
			AC5u0009GL000859	COG3613	Nucleoside 2-deoxyribosyltransferase
			AC5u0009GL000889	COG0151	Phosphoribosylamine-glycine ligase
			AC5u0009GL000890	COG0138	AICAR transformylase/IMP cyclohydrolase PurH
			AC5u0009GL000891	COG0299	Folate-dependent phosphoribosylglycinamide formyltransferase PurN
			AC5u0009GL000892	COG0150	Phosphoribosylaminoimidazole (AIR) synthetase
			AC5u0009GL000893	COG0034	Glutamine phosphoribosylpyrophosphate amidotransferase
			AC5u0009GL000894	COG0046	Phosphoribosylformylglycinamidine (FGAM) synthase, synthetase domain
			AC5u0009GL000895	COG0047	Phosphoribosylformylglycinamidine (FGAM) synthase, glutamine amidotransferase domain
			AC5u0009GL000896	COG1828	Phosphoribosylformylglycinamidine (FGAM) synthase, PurS component
			AC5u0009GL000897	COG0152	Phosphoribosylaminoimidazole-succinocarboxamide synthase
			AC5u0009GL000898	COG0015	Adenylosuccinate lyase
			AC5u0009GL000899	COG0026	Phosphoribosylaminoimidazole carboxylase (NCAIR synthetase)
			AC5u0009GL000900	COG0041	Phosphoribosylcarboxyaminoimidazole (NCAIR) mutase
			AC5u0009GL000908	COG2759	Formyltetrahydrofolate synthetase
			AC5u0009GL000947	COG1051	ADP-ribose pyrophosphatase YjhB, NUDIX family
			AC5u0009GL000948	COG0194	Guanylate kinase
			AC5u0009GL000967	COG0518	GMP synthase - Glutamine amidotransferase domain
			AC5u0009GL001221	COG1428	Deoxyadenosine/deoxycytidine kinase
			AC5u0009GL001257	COG0503	Adenine/guanine phosphoribosyltransferase or related PRPP-binding protein
			AC5u0009GL001278	COG0737	2',3'-cyclic-nucleotide 2'-phosphodiesterase/5'- or 3'-nucleotidase, 5'-nucleotidase family
			AC5u0009GL001486	COG2233	Xanthine/uracil permease
			AC5u0009GL001493	COG0461	Orotate phosphoribosyltransferase
			AC5u0009GL001494	COG0284	Orotidine-5'-phosphate decarboxylase
			AC5u0009GL001495	COG0167	Dihydroorotate dehydrogenase
			AC5u0009GL001496	COG0044	Dihydroorotase or related cyclic amidohydrolase
			AC5u0009GL001497	COG0540	Aspartate carbamoyltransferase, catalytic chain
			AC5u0009GL001503	COG0516	IMP dehydrogenase/GMP reductase
			AC5u0009GL001505	COG0813	Purine-nucleoside phosphorylase
			AC5u0009GL001506	COG0213	Thymidine phosphorylase
			AC5u0009GL001508	COG0274	Deoxyribose-phosphate aldolase
			AC5u0009GL001530	COG0458	Carbamoyl-phosphate synthase
			AC5u0009GL001628	COG0209	Ribonucleoside-triphosphate reductase activity
			AC5u0009GL001662	COG1957	Inosine-uridine nucleoside N-ribohydrolase
			AC5u0009GL001663	COG1972	Nucleoside permease NupC
			AC5u0009GL001712	COG0062	NAD(P)H-hydrate repair enzyme Nnr, NAD(P)H-hydrate epimerase domain
			AC5u0009GL001810	COG0061	NAD kinase
			AC5u0009GL001811	COG2357	ppGpp synthetase catalytic domain (RelA/SpoT-type nucleotidyltranferase)
			AC5u0009GL001821	COG0634	Hypoxanthine-guanine phosphoribosyltransferase
			AC5u0009GL001998	COG1457	Purine-cytosine permease or related protein
			AC5u0009GL002084	COG1957	Inosine-uridine nucleoside N-ribohydrolase
			AC5u0009GL002107	COG2065	Pyrimidine operon attenuation protein/uracil phosphoribosyltransferase
		5. Energy production and conversion	AC5u0009GL000078	COG1254	Acylphosphatase
			AC5u0009GL000675	COG1252	NADH dehydrogenase, FAD-containing subunit
			AC5u0009GL000676	COG4987	ABC-type transport system involved in cytochrome bd biosynthesis, fused ATPase and permease components
			AC5u0009GL000677	COG4988	ABC transporter, CydDC cysteine exporter (CydDC-E) family, permease ATP-binding protein CydD
			AC5u0009GL000678	COG4988	ABC-type transport system involved in cytochrome bd biosynthesis, ATPase and permease components
			AC5u0009GL000679	COG1294	Cytochrome bd-type quinol oxidase, subunit 2
			AC5u0009GL000680	COG1271	Cytochrome bd-type quinol oxidase, subunit 1
			AC5u0009GL000694	COG1804	Involved in the catabolism of oxalate and in the adapatation to low pH via the induction of the oxalate-dependent acid tolerance response (ATR). Catalyzes the transfer of the CoA moiety from formyl-CoA to oxalate
			AC5u0009GL001374	COG1071	TPP-dependent pyruvate or acetoin dehydrogenase subunit alpha
			AC5u0009GL001375	COG0022	Pyruvate/2-oxoglutarate/acetoin dehydrogenase complex, dehydrogenase (E1) component
			AC5u0009GL001376	COG0508	Pyruvate/2-oxoglutarate dehydrogenase complex, dihydrolipoamide acyltransferase (E2) component
			AC5u0009GL001377	COG1249	Pyruvate/2-oxoglutarate dehydrogenase complex, dihydrolipoamide dehydrogenase (E3) component or related enzyme
			AC5u0009GL001551	COG1227	Inorganic pyrophosphatase/exopolyphosphatase
			AC5u0009GL001740	COG1304	FMN-dependent dehydrogenase, includes L-lactate dehydrogenase and type II isopentenyl diphosphate isomerase
			AC5u0009GL001747	COG0039	Malate/lactate dehydrogenase
			AC5u0009GL001904	COG0431	NAD(P)H-dependent FMN reductase
			AC5u0009GL001905	COG0716	Flavodoxin
			AC5u0009GL001911	COG0282	Acetate kinase
			AC5u0009GL001912	COG1454	Alcohol dehydrogenase, class IV
			AC5u0009GL001913	COG1012	Acyl-CoA reductase or other NAD-dependent aldehyde dehydrogenase
			AC5u0009GL002024	COG1301	Na+/H+-dicarboxylate symporter
			AC5u0009GL002074	COG0604	NADPH:quinone reductase or related Zn-dependent oxidoreductase
			AC5u0009GL000103	COG0355	FoF1-type ATP synthase, epsilon subunit
			AC5u0009GL000104	COG0055	FoF1-type ATP synthase, beta subunit
			AC5u0009GL000105	COG0224	FoF1-type ATP synthase, gamma subunit
			AC5u0009GL000106	COG0056	FoF1-type ATP synthase, alpha subunit
			AC5u0009GL000107	COG0712	FoF1-type ATP synthase, delta subunit
			AC5u0009GL000108	COG0711	FoF1-type ATP synthase, membrane subunit b or b'
			AC5u0009GL000109	COG0636	FoF1-type ATP synthase, membrane subunit c/Archaeal/vacuolar-type H+-ATPase, subunit K
			AC5u0009GL000110	COG0356	FoF1-type ATP synthase, membrane subunit a
			AC5u0009GL000175	COG0039	Malate/lactate dehydrogenase
			AC5u0009GL000177	COG2055	Malate/lactate/ureidoglycolate dehydrogenase, LDH2 family
			AC5u0009GL000202	COG1052	Lactate dehydrogenase or related 2-hydroxyacid dehydrogenase
			AC5u0009GL000245	COG2181	Nitrate reductase gamma subunit
			AC5u0009GL000246	COG2180	nitrate reductase molybdenum cofactor assembly chaperone
			AC5u0009GL000247	COG1140	Nitrate reductase beta subunit
			AC5u0009GL000248	COG5013	Nitrate reductase alpha subunit
			AC5u0009GL000398	COG0584	Membrane domain of glycerophosphoryl diester phosphodiesterase
			AC5u0009GL000420	COG1052	Lactate dehydrogenase or related 2-hydroxyacid dehydrogenase
			AC5u0009GL000468	COG0039	Malate/lactate dehydrogenase
			AC5u0009GL000550	COG2326	Polyphosphate kinase 2, PPK2 family
			AC5u0009GL000611	COG0039	Malate/lactate dehydrogenase
			AC5u0009GL000754	COG1012	Acyl-CoA reductase or other NAD-dependent aldehyde dehydrogenase
			AC5u0009GL000793	COG0240	Glycerol-3-phosphate dehydrogenase
			AC5u0009GL000795	COG1556	L-lactate utilization protein LutC, contains LUD domain
			AC5u0009GL000796	COG1139	L-lactate utilization protein LutB, contains a ferredoxin-type domain
			AC5u0009GL000797	COG0247	Fe-S oxidoreductase
			AC5u0009GL000884	COG0716	Flavodoxin
			AC5u0009GL000928	COG1249	Pyruvate/2-oxoglutarate dehydrogenase complex, dihydrolipoamide dehydrogenase (E3) component or related enzyme
			AC5u0009GL000940	COG1757	Na+/H+ antiporter NhaC
			AC5u0009GL000955	COG1052	Lactate dehydrogenase or related 2-hydroxyacid dehydrogenase
			AC5u0009GL000976	COG0280	Phosphotransacetylase
			AC5u0009GL001109	COG3051	Citrate lyase, alpha subunit
			AC5u0009GL001111	COG3052	Citrate lyase, gamma subunit
			AC5u0009GL001112	COG3053	Citrate lyase synthetase
			AC5u0009GL001113	COG0281	Malic enzyme
			AC5u0009GL001116	COG0039	Malate/lactate dehydrogenase
			AC5u0009GL001117	COG1053	Succinate dehydrogenase/fumarate reductase, flavoprotein subunit
			AC5u0009GL001118	COG0114	Fumarate hydratase class II
			AC5u0009GL001119	COG0281	Malic enzyme
			AC5u0009GL001161	COG0716	Flavodoxin
			AC5u0009GL001170	COG0039	Malate/lactate dehydrogenase
			AC5u0009GL001188	COG0431	NAD(P)H-dependent FMN reductase
			AC5u0009GL001189	COG0431	NAD(P)H-dependent FMN reductase
			AC5u0009GL001208	COG0604	NADPH:quinone reductase or related Zn-dependent oxidoreductase
			AC5u0009GL001209	COG0604	Zinc-binding dehydrogenase
			AC5u0009GL001307	COG0778	Nitroreductase
			AC5u0009GL001308	COG0778	Nitroreductase
			AC5u0009GL001478	COG0554	Glycerol kinase
			AC5u0009GL001480	COG0371	Glycerol dehydrogenase or related enzyme, iron-containing ADH family
			AC5u0009GL001485	COG1757	Na+/H+ antiporter NhaC
			AC5u0009GL001516	COG0431	NAD(P)H-dependent FMN reductase
			AC5u0009GL001517	COG1454	Alcohol dehydrogenase, class IV
			AC5u0009GL001521	COG1012	Acyl-CoA reductase or other NAD-dependent aldehyde dehydrogenase
			AC5u0009GL001632	COG1052	Lactate dehydrogenase or related 2-hydroxyacid dehydrogenase
			AC5u0009GL001957	COG0778	Nitroreductase
			AC5u0009GL000277	COG1249	Pyruvate/2-oxoglutarate dehydrogenase complex, dihydrolipoamide dehydrogenase (E3) component or related enzyme
		6. Inorganic ion transport and metabolism	AC5u0009GL000060	COG0607	Rhodanese-related sulfurtransferase
			AC5u0009GL000700	COG3022	Cytoplasmic iron level regulating protein YaaA, DUF328/UPF0246 family
			AC5u0009GL001043	COG0735	Fe2+ or Zn2+ uptake regulation protein
			AC5u0009GL001763	COG1918	Fe2+ transport system protein FeoA
			AC5u0009GL001764	COG0370	Fe2+ transport system protein B
			AC5u0009GL001885	COG1122	Energy-coupling factor transporter ATP-binding protein EcfA2
			AC5u0009GL001887	COG1930	ABC-type cobalt transport system, periplasmic component
			AC5u0009GL001888	COG0310	ABC-type Co2+ transport system, permease component
			AC5u0009GL001907	COG4300	Cadmium resistance transporter
			AC5u0009GL002015	COG2807	Transporter, major facilitator family protein
			AC5u0009GL000133	COG0025	Sodium proton antiporter
			AC5u0009GL000134	COG0025	NhaP-type Na+/H+ or K+/H+ antiporter
			AC5u0009GL000135	COG0025	Sodium proton antiporter
			AC5u0009GL000138	COG2217	Cation transport ATPase
			AC5u0009GL000260	COG2223	Nitrate/nitrite transporter NarK
			AC5u0009GL000264	COG0609	ABC-type Fe3+-siderophore transport system, permease component
			AC5u0009GL000265	COG1120	ABC-type cobalamin/Fe3+-siderophores transport system, ATPase component
			AC5u0009GL000266	COG0614	ABC-type Fe3+-hydroxamate transport system, periplasmic component
			AC5u0009GL000272	COG0038	H+/Cl- antiporter ClcA
			AC5u0009GL000316	COG1122	Energy-coupling factor transporter ATP-binding protein EcfA2
			AC5u0009GL000317	COG1122	Energy-coupling factor transporter ATP-binding protein EcfA2
			AC5u0009GL000402	COG0038	Voltage gated chloride channel
			AC5u0009GL000473	COG4097	Nitric oxide dioxygenase activity
			AC5u0009GL000586	COG1108	ABC-type Mn2+/Zn2+ transport system, permease component
			AC5u0009GL000587	COG1121	ABC-type Mn2+/Zn2+ transport system, ATPase component
			AC5u0009GL000588	COG0803	ABC-type Zn uptake system ZnuABC, Zn-binding component ZnuA
			AC5u0009GL000605	COG0475	Kef-type K+ transport system, membrane component KefB
			AC5u0009GL000612	COG1464	ABC-type metal ion transport system, periplasmic component/surface antigen
			AC5u0009GL000617	COG0038	Chloride
			AC5u0009GL000715	COG2985	Predicted Permease Membrane Region
			AC5u0009GL000770	COG0855	Polyphosphate kinase
			AC5u0009GL000924	COG2217	Cation transport ATPase
			AC5u0009GL000939	COG0053	Divalent metal cation (Fe/Co/Zn/Cd) transporter
			AC5u0009GL000949	COG0735	Fe2+ or Zn2+ uptake regulation protein
			AC5u0009GL000969	COG0038	H+/Cl- antiporter ClcA
			AC5u0009GL001214	COG0025	Sodium proton antiporter
			AC5u0009GL001217	COG1122	Energy-coupling factor transporter ATP-binding protein EcfA2
			AC5u0009GL001229	COG1230	Co/Zn/Cd efflux system component
			AC5u0009GL001230	COG1814	Predicted Fe2+/Mn2+ transporter, VIT1/CCC1 family
			AC5u0009GL001231	COG1814	Predicted Fe2+/Mn2+ transporter, VIT1/CCC1 family
			AC5u0009GL001302	COG1914	Mn2+ and Fe2+ transporters of the NRAMP family
			AC5u0009GL001304	COG0569	Trk K+ transport system, NAD-binding component
			AC5u0009GL001305	COG0168	Trk-type K+ transport system, membrane component
			AC5u0009GL001313	COG0704	Phosphate uptake regulator
			AC5u0009GL001314	COG1117	ABC-type phosphate transport system, ATPase component
			AC5u0009GL001315	COG0581	ABC-type phosphate transport system, permease component
			AC5u0009GL001316	COG0573	ABC-type phosphate transport system, permease component
			AC5u0009GL001317	COG0226	ABC-type phosphate transport system, periplasmic component
			AC5u0009GL001393	COG1464	ABC-type metal ion transport system, periplasmic component/surface antigen
			AC5u0009GL001439	COG2837	Periplasmic deferrochelatase/peroxidase EfeB
			AC5u0009GL001476	COG0569	Trk K+ transport system, NAD-binding component
			AC5u0009GL001488	COG0598	Mg2+ and Co2+ transporter CorA
			AC5u0009GL001490	COG0861	Membrane protein TerC, possibly involved in tellurium resistance
			AC5u0009GL001510	COG1235	Phosphoribosyl 1,2-cyclic phosphodiesterase
			AC5u0009GL001649	COG0783	DNA-binding ferritin-like protein (oxidative damage protectant)
			AC5u0009GL001650	COG2608	Copper chaperone CopZ
			AC5u0009GL001651	COG2217	Cation transport ATPase
			AC5u0009GL001816	COG1393	Arsenate reductase and related proteins, glutaredoxin family
			AC5u0009GL001832	COG0474	Magnesium-transporting ATPase (P-type)
			AC5u0009GL001833	COG0783	DNA-binding ferritin-like protein (oxidative damage protectant)
			AC5u0009GL001853	COG1914	Mn2+ and Fe2+ transporters of the NRAMP family
			AC5u0009GL001969	COG4300	Cadmium resistance protein CadD, predicted permease
			AC5u0009GL001983	COG2223	Nitrate/nitrite transporter NarK
			AC5u0009GL002001	COG2217	Cation transport ATPase
			AC5u0009GL002183	COG4300	Cadmium resistance protein CadD, predicted permease
			AC5u0009GL002193	COG0798	Arsenite efflux pump ArsB, ACR3 family
			AC5u0009GL000285	COG0798	Sodium Bile acid symporter family
		7. Lipid transport and metabolism	AC5u0009GL000012	COG0236	Acyl carrier protein
			AC5u0009GL000013	COG0416	Fatty acid/phospholipid biosynthesis enzyme
			AC5u0009GL000692	COG1804	Crotonobetainyl-CoA:carnitine CoA-transferase CaiB and related acyl-CoA transferases
			AC5u0009GL000693	COG1804	Crotonobetainyl-CoA:carnitine CoA-transferase CaiB and related acyl-CoA transferases
			AC5u0009GL001370	COG1597	Diacylglycerol kinase catalytic
			AC5u0009GL001555	COG0344	Phospholipid biosynthesis protein PlsY, probable glycerol-3-phosphate acyltransferase
			AC5u0009GL001564	COG1307	Fatty acid-binding protein DegV (function unknown)
			AC5u0009GL001598	COG0818	Diacylglycerol kinase
			AC5u0009GL001737	COG1577	Mevalonate kinase
			AC5u0009GL001738	COG3407	Mevalonate pyrophosphate decarboxylase
			AC5u0009GL001739	COG1577	Mevalonate kinase
			AC5u0009GL001766	COG0318	Acyl-CoA synthetase (AMP-forming)/AMP-acid ligase II
			AC5u0009GL002046	COG1502	Phosphatidylserine/phosphatidylglycerophosphate/cardiolipin synthase or related enzyme
			AC5u0009GL000196	COG0575	CDP-diglyceride synthetase
			AC5u0009GL000197	COG0020	Undecaprenyl pyrophosphate synthase
			AC5u0009GL000205	COG0204	1-acyl-sn-glycerol-3-phosphate acyltransferase
			AC5u0009GL000209	COG3425	3-hydroxy-3-methylglutaryl CoA synthase
			AC5u0009GL000221	COG0623	Enoyl-[acyl-carrier-protein] reductase (NADH)
			AC5u0009GL000222	COG0825	Acetyl-CoA carboxylase alpha subunit
			AC5u0009GL000223	COG0777	Acetyl-CoA carboxylase beta subunit
			AC5u0009GL000224	COG0439	Biotin carboxylase
			AC5u0009GL000225	COG0764	3-hydroxymyristoyl/3-hydroxydecanoyl-(acyl carrier protein) dehydratase
			AC5u0009GL000227	COG0304	3-oxoacyl-(acyl-carrier-protein) synthase
			AC5u0009GL000228	COG1028	NAD(P)-dependent dehydrogenase, short-chain alcohol dehydrogenase family
			AC5u0009GL000229	COG0331	Malonyl CoA-acyl carrier protein transacylase
			AC5u0009GL000230	COG0236	Acyl carrier protein
			AC5u0009GL000231	COG0332	3-oxoacyl-[acyl-carrier-protein] synthase III
			AC5u0009GL000233	COG0764	3-hydroxymyristoyl/3-hydroxydecanoyl-(acyl carrier protein) dehydratase
			AC5u0009GL000275	COG0671	Acid phosphatase homologues
			AC5u0009GL000322	COG1028	NAD(P)-dependent dehydrogenase, short-chain alcohol dehydrogenase family
			AC5u0009GL000332	COG1597	Diacylglycerol kinase family enzyme
			AC5u0009GL000369	COG0236	Acyl carrier protein
			AC5u0009GL000373	COG0736	Phosphopantetheinyl transferase (holo-ACP synthase)
			AC5u0009GL000396	COG0446	NADPH-dependent 2,4-dienoyl-CoA reductase, sulfur reductase, or a related oxidoreductase
			AC5u0009GL000410	COG0183	Acetyl-CoA acetyltransferase
			AC5u0009GL000414	COG1502	Phosphatidylserine/phosphatidylglycerophosphate/cardiolipin synthase or related enzyme
			AC5u0009GL000415	COG1502	Catalyzes the reversible phosphatidyl group transfer from one phosphatidylglycerol molecule to another to form cardiolipin (CL) (diphosphatidylglycerol) and glycerol
			AC5u0009GL000589	COG1947	4-diphosphocytidyl-2C-methyl-D-erythritol kinase
			AC5u0009GL000599	COG1257	Hydroxymethylglutaryl-CoA reductase
			AC5u0009GL000725	COG0657	Acetyl esterase/lipase
			AC5u0009GL000768	COG3884	Acyl-ACP thioesterase
			AC5u0009GL000801	COG1607	Acyl-CoA hydrolase
			AC5u0009GL000853	COG0657	Acetyl esterase/lipase
			AC5u0009GL000866	COG1502	Catalyzes the reversible phosphatidyl group transfer from one phosphatidylglycerol molecule to another to form cardiolipin (CL) (diphosphatidylglycerol) and glycerol
			AC5u0009GL000910	COG2230	Cyclopropane fatty-acyl-phospholipid synthase and related methyltransferases
			AC5u0009GL000931	COG0671	Membrane-associated phospholipid phosphatase
			AC5u0009GL000944	COG1028	NAD(P)-dependent dehydrogenase, short-chain alcohol dehydrogenase family
			AC5u0009GL001102	COG0657	Acetyl esterase/lipase
			AC5u0009GL001107	COG2267	Alpha/beta hydrolase family
			AC5u0009GL001162	COG2246	Putative flippase GtrA (transmembrane translocase of bactoprenol-linked glucose)
			AC5u0009GL001220	COG1028	NAD(P)-dependent dehydrogenase, short-chain alcohol dehydrogenase family
			AC5u0009GL001224	COG0671	phosphatase
			AC5u0009GL001246	COG0657	Alpha beta
			AC5u0009GL001441	COG0657	Acetyl esterase/lipase
			AC5u0009GL001458	COG1835	Transferase activity, transferring acyl groups other than amino-acyl groups
			AC5u0009GL001512	COG1267	Phosphatidylglycerophosphatase A
			AC5u0009GL001533	COG1307	Fatty acid-binding protein DegV (function unknown)
			AC5u0009GL001661	COG1250	3-hydroxyacyl-CoA dehydrogenase
			AC5u0009GL001831	COG2267	Lysophospholipase, alpha-beta hydrolase superfamily
			AC5u0009GL001962	COG1968	Undecaprenyl pyrophosphate phosphatase UppP
		8. Secondary metabolites biosynthesis, transport and catabolism	AC5u0009GL000702	COG0346	Catechol 2,3-dioxygenase or other lactoylglutathione lyase family enzyme
			AC5u0009GL001035	COG0656	Aldo/keto reductase, related to diketogulonate reductase
			AC5u0009GL001768	COG2050	Acyl-coenzyme A thioesterase PaaI, contains HGG motif
			AC5u0009GL001916	COG4576	Carboxysome shell and ethanolamine utilization microcompartment protein CcmK/EutM
			AC5u0009GL001918	COG4869	Propanediol utilization protein
			AC5u0009GL001919	COG4577	Carboxysome shell and ethanolamine utilization microcompartment protein CcmL/EutN
			AC5u0009GL001920	COG4577	Carboxysome shell and ethanolamine utilization microcompartment protein CcmL/EutN
			AC5u0009GL001923	COG4910	Propanediol dehydratase, small subunit
			AC5u0009GL001924	COG4909	Dehydratase medium subunit
			AC5u0009GL001925	COG4909	Propanediol dehydratase, large subunit
			AC5u0009GL001927	COG4577	Carboxysome shell and ethanolamine utilization microcompartment protein CcmL/EutN
			AC5u0009GL002037	COG0656	Aldo/keto reductase, related to diketogulonate reductase
			AC5u0009GL000371	COG1020	Non-ribosomal peptide synthetase component F
			AC5u0009GL000378	COG3971	2-keto-4-pentenoate hydratase
			AC5u0009GL000399	COG0656	Aldo/keto reductase, related to diketogulonate reductase
			AC5u0009GL000462	COG0656	Aldo/keto reductase, related to diketogulonate reductase
			AC5u0009GL000463	COG0656	Aldo/keto reductase, related to diketogulonate reductase
			AC5u0009GL000469	COG3971	2-keto-4-pentenoate hydratase
			AC5u0009GL000876	COG0346	Catechol 2,3-dioxygenase or other lactoylglutathione lyase family enzyme
			AC5u0009GL000906	COG3527	Alpha-acetolactate decarboxylase
			AC5u0009GL000962	COG0446	Pyridine nucleotide-disulphide oxidoreductase
			AC5u0009GL000971	COG1647	Esterase/lipase
			AC5u0009GL001303	COG0500	Methyltransferase
			AC5u0009GL001477	COG1942	Phenylpyruvate tautomerase PptA, 4-oxalocrotonate tautomerase family
			AC5u0009GL001812	COG2761	Thioredoxin
	Information storage and processing	1. Translation, ribosomal structure and biogenesis	AC5u0009GL000001	COG0335	Ribosomal protein L19
			AC5u0009GL000003	COG0336	tRNA G37 N-methylase TrmD
			AC5u0009GL000004	COG0806	Ribosomal 30S subunit maturation factor RimM, required for 16S rRNA processing
			AC5u0009GL000006	COG0228	Ribosomal protein S16
			AC5u0009GL000017	COG0227	Ribosomal protein L28
			AC5u0009GL000020	COG1162	Putative ribosome biogenesis GTPase RsgA
			AC5u0009GL000024	COG0223	Methionyl-tRNA formyltransferase
			AC5u0009GL000032	COG1189	Predicted rRNA methylase YqxC, contains S4 and FtsJ domains
			AC5u0009GL000039	COG1514	2'-5' RNA ligase superfamily
			AC5u0009GL000042	COG0211	Ribosomal protein L27
			AC5u0009GL000044	COG0261	Ribosomal protein L21
			AC5u0009GL000056	COG0008	Glutamyl- or glutaminyl-tRNA synthetase
			AC5u0009GL000058	COG0324	tRNA A37 N6-isopentenylltransferase MiaA
			AC5u0009GL000066	COG0267	Ribosomal protein L33
			AC5u0009GL000073	COG0072	Phenylalanyl-tRNA synthetase beta subunit
			AC5u0009GL000074	COG0016	Phenylalanyl-tRNA synthetase alpha subunit
			AC5u0009GL000076	COG1418	HD superfamily phosphodieaserase, includes HD domain of RNase Y
			AC5u0009GL000077	COG0566	tRNA G18 (ribose-2'-O)-methylase SpoU
			AC5u0009GL000080	COG0242	Peptide deformylase
			AC5u0009GL000088	COG0799	Ribosomal silencing factor RsfS, regulates association of 30S and 50S subunits
			AC5u0009GL000091	COG1534	RNA-binding protein YhbY
			AC5u0009GL000092	COG1161	Ribosome biogenesis GTPase A
			AC5u0009GL000681	COG0525	Valyl-tRNA synthetase
			AC5u0009GL000685	COG0522	Ribosomal protein S4 or related protein
			AC5u0009GL001047	COG0495	Leucyl-tRNA synthetase
			AC5u0009GL001324	COG0219	tRNA(Leu) C34 or U34 (ribose-2'-O)-methylase TrmL, contains SPOUT domain
			AC5u0009GL001328	COG2001	MraZ, DNA-binding transcriptional regulator and inhibitor of RsmH methyltransferase activity
			AC5u0009GL001329	COG0275	16S rRNA C1402 N4-methylase RsmH
			AC5u0009GL001342	COG0060	Isoleucyl-tRNA synthetase
			AC5u0009GL001349	COG0482	tRNA U34 2-thiouridine synthase MnmA/TrmU, contains the PP-loop ATPase domain
			AC5u0009GL001373	COG0242	Peptide deformylase
			AC5u0009GL001383	COG0742	16S rRNA G966 N2-methylase RsmD
			AC5u0009GL001560	COG1161	Ribosome biogenesis GTPase A
			AC5u0009GL001569	COG0617	tRNA nucleotidyltransferase/poly(A) polymerase
			AC5u0009GL001573	COG0539	Ribosomal protein S1
			AC5u0009GL001579	COG1187	16S rRNA U516 pseudouridylate synthase RsuA and related 23S rRNA U2605, pseudouridylate synthases
			AC5u0009GL001590	COG2384	tRNA A22 N-methylase
			AC5u0009GL001594	COG0751	Glycyl-tRNA synthetase, beta subunit
			AC5u0009GL001595	COG0752	Glycyl-tRNA synthetase, alpha subunit
			AC5u0009GL001597	COG1159	GTPase Era, involved in 16S rRNA processing
			AC5u0009GL001599	COG0319	ssRNA-specific RNase YbeY, 16S rRNA maturation enzyme
			AC5u0009GL001727	COG0116	23S rRNA G2445 N2-methylase RlmL
			AC5u0009GL001751	COG0144	16S rRNA C967 or C1407 C5-methylase, RsmB/RsmF family
			AC5u0009GL002048	COG2110	O-acetyl-ADP-ribose deacetylase (regulator of RNase III), contains Macro domain
			AC5u0009GL000117	COG0009	tRNA A37 threonylcarbamoyladenosine synthetase subunit TsaC/SUA5/YrdC
			AC5u0009GL000118	COG2890	Methylase of polypeptide chain release factors
			AC5u0009GL000119	COG0216	Protein chain release factor A
			AC5u0009GL000163	COG0828	Ribosomal protein S21
			AC5u0009GL000166	COG0173	Aspartyl-tRNA synthetase
			AC5u0009GL000168	COG1490	D-Tyr-tRNAtyr deacylase
			AC5u0009GL000171	COG1385	16S rRNA U1498 N3-methylase RsmE
			AC5u0009GL000172	COG2264	Ribosomal protein L11 methylase PrmA
			AC5u0009GL000179	COG0481	Translation elongation factor EF-4, membrane-bound GTPase
			AC5u0009GL000186	COG0130	tRNA U55 pseudouridine synthase TruB, may also work on U342 of tmRNA
			AC5u0009GL000187	COG0858	Ribosome-binding factor A
			AC5u0009GL000188	COG0532	Translation initiation factor IF-2, a GTPase
			AC5u0009GL000189	COG1358	Ribosomal protein L7Ae or related RNA K-turn-binding protein
			AC5u0009GL000192	COG0779	Ribosome maturation factor RimP
			AC5u0009GL000194	COG0442	Prolyl-tRNA synthetase
			AC5u0009GL000198	COG0233	Ribosome recycling factor
			AC5u0009GL000200	COG0264	Translation elongation factor EF-Ts
			AC5u0009GL000201	COG0052	Ribosomal protein S2
			AC5u0009GL000204	COG4123	tRNA1(Val) A37 N6-methylase TrmN6
			AC5u0009GL000287	COG0051	Ribosomal protein S10
			AC5u0009GL000288	COG0087	Ribosomal protein L3
			AC5u0009GL000289	COG0088	Ribosomal protein L4
			AC5u0009GL000290	COG0089	Ribosomal protein L23
			AC5u0009GL000291	COG0090	Ribosomal protein L2
			AC5u0009GL000292	COG0185	Ribosomal protein S19
			AC5u0009GL000293	COG0091	Ribosomal protein L22
			AC5u0009GL000294	COG0092	Ribosomal protein S3
			AC5u0009GL000295	COG0197	Ribosomal protein L16/L10AE
			AC5u0009GL000296	COG0255	Ribosomal protein L29
			AC5u0009GL000297	COG0186	Ribosomal protein S17
			AC5u0009GL000298	COG0093	Ribosomal protein L14
			AC5u0009GL000299	COG0198	Ribosomal protein L24
			AC5u0009GL000300	COG0094	Ribosomal protein L5
			AC5u0009GL000301	COG0199	Ribosomal protein S14
			AC5u0009GL000302	COG0096	Ribosomal protein S8
			AC5u0009GL000303	COG0097	Ribosomal protein L6P/L9E
			AC5u0009GL000304	COG0256	Ribosomal protein L18
			AC5u0009GL000305	COG0098	Ribosomal protein S5
			AC5u0009GL000306	COG1841	Ribosomal protein L30/L7E
			AC5u0009GL000307	COG0200	Ribosomal protein L15
			AC5u0009GL000310	COG0361	Translation initiation factor IF-1
			AC5u0009GL000311	COG0257	Ribosomal protein L36
			AC5u0009GL000312	COG0099	Ribosomal protein S13
			AC5u0009GL000313	COG0100	Ribosomal protein S11
			AC5u0009GL000315	COG0203	Ribosomal protein L17
			AC5u0009GL000319	COG0101	tRNA U38,U39,U40 pseudouridine synthase TruA
			AC5u0009GL000320	COG0102	Ribosomal protein L13
			AC5u0009GL000321	COG0103	Ribosomal protein S9
			AC5u0009GL000329	COG0721	Asp-tRNAAsn/Glu-tRNAGln amidotransferase C subunit
			AC5u0009GL000330	COG0154	Asp-tRNAAsn/Glu-tRNAGln amidotransferase A subunit or related amidase
			AC5u0009GL000331	COG0064	Asp-tRNAAsn/Glu-tRNAGln amidotransferase B subunit
			AC5u0009GL000333	COG2265	tRNA/tmRNA/rRNA uracil-C5-methylase, TrmA/RlmC/RlmD family
			AC5u0009GL000353	COG0254	Ribosomal protein L31
			AC5u0009GL000380	COG0193	Peptidyl-tRNA hydrolase
			AC5u0009GL000382	COG1188	Ribosomal 50S subunit-recycling heat shock protein, contains S4 domain
			AC5u0009GL000385	COG0037	tRNA(Ile)-lysidine synthase TilS/MesJ
			AC5u0009GL000389	COG0042	tRNA-dihydrouridine synthase
			AC5u0009GL000390	COG1190	Lysyl-tRNA synthetase (class II)
			AC5u0009GL000416	COG0456	Ribosomal protein S18 acetylase RimI and related acetyltransferases
			AC5u0009GL000429	COG0441	Threonyl-tRNA synthetase
			AC5u0009GL000453	COG0017	Aspartyl/asparaginyl-tRNA synthetase
			AC5u0009GL000465	COG0252	L-asparaginase/archaeal Glu-tRNAGln amidotransferase subunit D
			AC5u0009GL000554	COG0359	Ribosomal protein L9
			AC5u0009GL000558	COG0238	Ribosomal protein S18
			AC5u0009GL000560	COG0360	Ribosomal protein S6
			AC5u0009GL000564	COG2501	Ribosome-associated protein YbcJ, S4-like RNA binding protein
			AC5u0009GL000567	COG0230	Ribosomal protein L34
			AC5u0009GL000568	COG0594	RNase P protein component
			AC5u0009GL000571	COG0486	tRNA U34 5-carboxymethylaminomethyl modifying GTPase MnmE/TrmE
			AC5u0009GL000572	COG0445	tRNA U34 5-carboxymethylaminomethyl modifying enzyme MnmG/GidA
			AC5u0009GL000591	COG0030	16S rRNA A1518 and A1519 N6-dimethyltransferase RsmA/KsgA/DIM1 (may also have DNA glycosylase/AP lyase activity)
			AC5u0009GL000592	COG1658	5S rRNA maturation endonuclease (Ribonuclease M5), contains TOPRIM domain
			AC5u0009GL000594	COG0073	tRNA-binding EMAP/Myf domain
			AC5u0009GL000601	COG0180	Tryptophanyl-tRNA synthetase
			AC5u0009GL000736	COG0215	Cysteinyl-tRNA synthetase
			AC5u0009GL000737	COG1939	23S rRNA maturation mini-RNase III
			AC5u0009GL000738	COG0566	tRNA G18 (ribose-2'-O)-methylase SpoU
			AC5u0009GL000741	COG0080	Ribosomal protein L11
			AC5u0009GL000742	COG0081	Ribosomal protein L1
			AC5u0009GL000747	COG0244	Ribosomal protein L10
			AC5u0009GL000748	COG0222	Ribosomal protein L7/L12
			AC5u0009GL000758	COG0590	tRNA(Arg) A34 adenosine deaminase TadA
			AC5u0009GL000767	COG0313	16S rRNA C1402 (ribose-2'-O) methylase RsmI
			AC5u0009GL000773	COG1214	tRNA A37 threonylcarbamoyladenosine modification protein TsaB
			AC5u0009GL000774	COG0456	Ribosomal protein S18 acetylase RimI and related acetyltransferases
			AC5u0009GL000775	COG0533	tRNA A37 threonylcarbamoyltransferase TsaD
			AC5u0009GL000785	COG1544	Ribosome-associated translation inhibitor RaiA
			AC5u0009GL000788	COG1186	Protein chain release factor B
			AC5u0009GL000815	COG0291	Ribosomal protein L35
			AC5u0009GL000886	COG0162	Tyrosyl-tRNA synthetase
			AC5u0009GL000958	COG2262	50S ribosomal subunit-associated GTPase HflX
			AC5u0009GL000977	COG0802	tRNA A37 threonylcarbamoyladenosine biosynthesis protein TsaE
			AC5u0009GL001129	COG4108	Peptide chain release factor RF-3
			AC5u0009GL001160	COG0024	Methionine aminopeptidase
			AC5u0009GL001186	COG2265	tRNA/tmRNA/rRNA uracil-C5-methylase, TrmA/RlmC/RlmD family
			AC5u0009GL001198	COG0480	Translation elongation factor EF-G, a GTPase
			AC5u0009GL001223	COG1670	Acetyltransferase (GNAT) domain
			AC5u0009GL001238	COG0595	mRNA degradation ribonuclease J1/J2
			AC5u0009GL001243	COG0564	Pseudouridylate synthase, 23S rRNA- or tRNA-specific
			AC5u0009GL001260	COG1234	Ribonuclease BN, tRNA processing enzyme
			AC5u0009GL001268	COG0050	Translation elongation factor EF-Tu, a GTPase
			AC5u0009GL001297	COG0048	Ribosomal protein S12
			AC5u0009GL001298	COG0049	Ribosomal protein S7
			AC5u0009GL001299	COG0480	Translation elongation factor EF-G, a GTPase
			AC5u0009GL001466	COG0199	Ribosomal protein S14
			AC5u0009GL001489	COG0564	Pseudouridylate synthase, 23S rRNA- or tRNA-specific
			AC5u0009GL001514	COG1576	23S rRNA pseudoU1915 N3-methylase RlmH
			AC5u0009GL001528	COG0564	Pseudouridylate synthase, 23S rRNA- or tRNA-specific
			AC5u0009GL001531	COG1293	Predicted component of the ribosome quality control (RQC) complex, YloA/Tae2 family, contains fibronectin-binding (FbpA) and DUF814 domains
			AC5u0009GL001535	COG1418	HD superfamily phosphodieaserase, includes HD domain of RNase Y
			AC5u0009GL001538	COG0456	Ribosomal protein S18 acetylase RimI and related acetyltransferases
			AC5u0009GL001612	COG0030	16S rRNA A1518 and A1519 N6-dimethyltransferase RsmA/KsgA/DIM1 (may also have DNA glycosylase/AP lyase activity)
			AC5u0009GL001626	COG2606	Cys-tRNA(Pro) deacylase, prolyl-tRNA editing enzyme YbaK/EbsC
			AC5u0009GL001655	COG0012	Ribosome-binding ATPase YchF, GTP1/OBG family
			AC5u0009GL001660	COG0357	16S rRNA G527 N7-methylase RsmG (former glucose-inhibited division protein B)
			AC5u0009GL001690	COG0480	Translation elongation factor EF-G, a GTPase
			AC5u0009GL001710	COG0124	Histidyl-tRNA synthetase
			AC5u0009GL001809	COG0564	Pseudouridylate synthase, 23S rRNA- or tRNA-specific
			AC5u0009GL001944	COG0617	Aminoglycoside-2''-adenylyltransferase
			AC5u0009GL001959	COG1813	Archaeal ribosome-binding protein aMBF1, putative translation factor, contains Zn-ribbon and HTH domains
			AC5u0009GL001982	COG0566	tRNA G18 (ribose-2'-O)-methylase SpoU
			AC5u0009GL001996	COG0456	Ribosomal protein S18 acetylase RimI and related acetyltransferases
			AC5u0009GL002007	COG0231	Translation elongation factor P (EF-P)/translation initiation factor 5A (eIF-5A)
			AC5u0009GL002100	COG0456	Ribosomal protein S18 acetylase RimI and related acetyltransferases
			AC5u0009GL002103	COG0268	Ribosomal protein S20
			AC5u0009GL002104	COG0184	Ribosomal protein S15P/S13E
			AC5u0009GL002105	COG0595	mRNA degradation ribonuclease J1/J2
		2. Transcription	AC5u0009GL000008	COG2739	Predicted DNA-binding protein YlxM, UPF0122 family
			AC5u0009GL000011	COG0571	dsRNA-specific ribonuclease
			AC5u0009GL000023	COG0781	Transcription termination factor NusB
			AC5u0009GL000027	COG1758	DNA-directed RNA polymerase, subunit K/omega
			AC5u0009GL000031	COG1438	Arginine repressor
			AC5u0009GL000037	COG0781	Transcription termination factor NusB
			AC5u0009GL000045	COG1309	Transcriptional regulator
			AC5u0009GL000070	COG0782	Transcription elongation factor, GreA/GreB family
			AC5u0009GL000075	COG1733	DNA-binding transcriptional regulator, HxlR family
			AC5u0009GL001024	COG0454	Acetyltransferase (GNAT) domain
			AC5u0009GL001056	COG1609	DNA-binding transcriptional regulator, LacI/PurR family
			AC5u0009GL001343	COG1278	Cold shock protein, CspA family
			AC5u0009GL001363	COG3835	Putative sugar diacid recognition
			AC5u0009GL001371	COG5503	DNA-dependent RNA polymerase auxiliary subunit epsilon
			AC5u0009GL001542	COG1609	Transcriptional regulator, LacI family
			AC5u0009GL001580	COG1386	Chromosome segregation and condensation protein ScpB
			AC5u0009GL001582	COG0454	COG0454 Histone acetyltransferase HPA2 and related acetyltransferases
			AC5u0009GL001592	COG0568	DNA-directed RNA polymerase, sigma subunit (sigma70/sigma32)
			AC5u0009GL001745	COG1609	Periplasmic binding protein-like domain
			AC5u0009GL001756	COG1396	Transcriptional regulator, contains XRE-family HTH domain
			AC5u0009GL001769	COG1191	Sigma factor activity
			AC5u0009GL001928	COG2207	Helix_turn_helix, arabinose operon control protein
			AC5u0009GL001935	COG1846	DNA-binding transcriptional regulator, MarR family
			AC5u0009GL001936	COG0789	Domain of unknown function (DUF1836)
			AC5u0009GL002023	COG1522	DNA-binding transcriptional regulator, Lrp family
			AC5u0009GL002026	COG1609	DNA-binding transcriptional regulator, LacI/PurR family
			AC5u0009GL002035	COG0782	Transcription elongation factor, GreA/GreB family
			AC5u0009GL002044	COG0789	Helix_turn_helix, mercury resistance
			AC5u0009GL002045	COG0789	Helix_turn_helix, mercury resistance
			AC5u0009GL002049	COG1476	DNA-binding transcriptional regulator, XRE-family HTH domain
			AC5u0009GL002069	COG1476	DNA-binding transcriptional regulator, XRE-family HTH domain
			AC5u0009GL002073	COG1733	DNA-binding transcriptional regulator, HxlR family
			AC5u0009GL000126	COG1438	Arginine repressor
			AC5u0009GL000145	COG2197	YcbB domain
			AC5u0009GL000183	COG1420	Transcriptional regulator of heat shock response
			AC5u0009GL000191	COG0195	Transcription antitermination factor NusA, contains S1 and KH domains
			AC5u0009GL000208	COG1974	SOS-response transcriptional repressor LexA (RecA-mediated autopeptidase)
			AC5u0009GL000232	COG1846	DNA-binding transcriptional regulator, MarR family
			AC5u0009GL000314	COG0202	DNA-directed RNA polymerase, alpha subunit/40 kD subunit
			AC5u0009GL000337	COG1475	DNA binding
			AC5u0009GL000338	COG0553	Superfamily II DNA or RNA helicase, SNF2 family
			AC5u0009GL000347	COG1309	Transcriptional regulator
			AC5u0009GL000350	COG3343	DNA-directed RNA polymerase, delta subunit
			AC5u0009GL000411	COG1609	Transcriptional regulator, LacI family
			AC5u0009GL000424	COG0454	FR47-like protein
			AC5u0009GL000441	COG1733	DNA-binding transcriptional regulator, HxlR family
			AC5u0009GL000443	COG1733	DNA-binding transcriptional regulator, HxlR family
			AC5u0009GL000449	COG1959	DNA-binding transcriptional regulator, IscR family
			AC5u0009GL000464	COG0583	DNA-binding transcriptional regulator, LysR family
			AC5u0009GL000467	COG1167	DNA-binding transcriptional regulator, MocR family, contains an aminotransferase domain
			AC5u0009GL000487	COG1974	SOS-response transcriptional repressor LexA (RecA-mediated autopeptidase)
			AC5u0009GL000547	COG1846	Helix_turn_helix multiple antibiotic resistance protein
			AC5u0009GL000556	COG2390	DNA-binding transcriptional regulator LsrR, DeoR family
			AC5u0009GL000708	COG1476	DNA-binding transcriptional regulator, XRE-family HTH domain
			AC5u0009GL000717	COG2188	DNA-binding transcriptional regulator, GntR family
			AC5u0009GL000720	COG2183	Transcriptional accessory protein Tex/SPT6
			AC5u0009GL000740	COG0250	Transcription antitermination factor NusG
			AC5u0009GL000743	COG1167	DNA-binding transcriptional regulator, MocR family, contains an aminotransferase domain
			AC5u0009GL000751	COG1695	DNA-binding transcriptional regulator, PadR family
			AC5u0009GL000789	COG1983	Phage shock protein PspC (stress-responsive transcriptional regulator)
			AC5u0009GL000810	COG1481	DNA-binding transcriptional regulator WhiA, involved in cell division
			AC5u0009GL000854	COG3620	Predicted transcriptional regulator with C-terminal CBS domains
			AC5u0009GL000880	COG3682	Predicted transcriptional regulator
			AC5u0009GL000885	COG0583	DNA-binding transcriptional regulator, LysR family
			AC5u0009GL000904	COG4977	Transcriptional regulator GlxA family, contains an amidase domain and an AraC-type DNA-binding HTH domain
			AC5u0009GL000919	COG1959	DNA-binding transcriptional regulator, IscR family
			AC5u0009GL000935	COG2207	AraC-type DNA-binding domain and AraC-containing proteins
			AC5u0009GL000952	COG1983	Phage shock protein PspC (stress-responsive transcriptional regulator)
			AC5u0009GL000953	COG1309	Transcriptional regulator (TetR family)
			AC5u0009GL000968	COG1396	Cro/C1-type HTH DNA-binding domain
			AC5u0009GL000972	COG0557	Exoribonuclease R
			AC5u0009GL000978	COG0454	Acetyltransferase (GNAT) domain
			AC5u0009GL000991	COG1846	DNA-binding transcriptional regulator, MarR family
			AC5u0009GL001019	COG1475	Domain of unknown function (DUF4417)
			AC5u0009GL001106	COG0583	DNA-binding transcriptional regulator, LysR family
			AC5u0009GL001114	COG2390	DNA-binding transcriptional regulator LsrR, DeoR family
			AC5u0009GL001120	COG0583	DNA-binding transcriptional regulator, LysR family
			AC5u0009GL001134	COG1725	DNA-binding transcriptional regulator YhcF, GntR family
			AC5u0009GL001185	COG1609	DNA-binding transcriptional regulator, LacI/PurR family
			AC5u0009GL001211	COG1396	Transcriptional regulator, contains XRE-family HTH domain
			AC5u0009GL001227	COG1278	Cold shock protein, CspA family
			AC5u0009GL001228	COG1321	Mn-dependent transcriptional regulator, DtxR family
			AC5u0009GL001240	COG0789	MerR HTH family regulatory protein
			AC5u0009GL001254	COG2944	Helix-turn-helix XRE-family like proteins
			AC5u0009GL001283	COG0553	Superfamily II DNA or RNA helicase, SNF2 family
			AC5u0009GL001290	COG4463	Transcriptional regulator CtsR
			AC5u0009GL001292	COG1309	DNA-binding transcriptional regulator, AcrR family
			AC5u0009GL001293	COG0085	DNA-directed RNA polymerase, beta subunit/140 kD subunit
			AC5u0009GL001294	COG0086	DNA-directed RNA polymerase, beta' subunit/160 kD subunit
			AC5u0009GL001319	#N/A	Transcriptional regulator, HxlR family
			AC5u0009GL001321	COG0454	Acetyltransferase
			AC5u0009GL001407	COG1396	Cro/C1-type HTH DNA-binding domain
			AC5u0009GL001498	COG0583	LysR substrate binding domain
			AC5u0009GL001504	COG2390	DNA-binding transcriptional regulator LsrR, DeoR family
			AC5u0009GL001607	COG2944	DNA-binding transcriptional regulator YiaG, XRE-type HTH domain
			AC5u0009GL001621	COG1309	Transcriptional regulator
			AC5u0009GL001625	COG2188	DNA-binding transcriptional regulator, GntR family
			AC5u0009GL001631	COG1846	Winged helix DNA-binding domain
			AC5u0009GL001643	COG3279	LytTr DNA-binding domain
			AC5u0009GL001652	COG1309	Transcriptional regulator
			AC5u0009GL001686	COG2188	UTRA domain
			AC5u0009GL001689	COG1476	Cro/C1-type HTH DNA-binding domain
			AC5u0009GL001704	COG0640	DNA-binding transcriptional regulator, ArsR family
			AC5u0009GL001706	COG1609	DNA-binding transcriptional regulator, LacI/PurR family
			AC5u0009GL001807	COG2344	NADH/NAD ratio-sensing transcriptional regulator Rex
			AC5u0009GL001815	COG4862	Negative regulator of genetic competence, sporulation and motility
			AC5u0009GL001827	COG1167	Aminotransferase class I and II
			AC5u0009GL001851	COG1309	DNA-binding transcriptional regulator, AcrR family
			AC5u0009GL001965	COG1476	DNA-binding transcriptional regulator, XRE-family HTH domain
			AC5u0009GL001968	COG0640	DNA-binding transcriptional regulator, ArsR family
			AC5u0009GL002000	COG3682	Predicted transcriptional regulator
			AC5u0009GL002098	COG3279	LytTr DNA-binding domain
			AC5u0009GL002099	COG0456	Acetyltransferase (GNAT) family
			AC5u0009GL002109	COG1309	Transcriptional regulator, TetR family
			AC5u0009GL002110	COG1309	Transcriptional regulator, TetR family
			AC5u0009GL000155	COG1476	Helix-turn-helix XRE-family like proteins
			AC5u0009GL000157	COG1595	DNA-templated transcription, initiation
		3. Replication, recombination and repair	AC5u0009GL000014	COG1200	RecG-like helicase
			AC5u0009GL000025	COG1198	Primosomal protein N' (replication factor Y) - superfamily II helicase
			AC5u0009GL000030	COG0497	DNA repair ATPase RecN
			AC5u0009GL000034	COG1722	Exonuclease VII small subunit
			AC5u0009GL000035	COG1570	Exonuclease VII, large subunit
			AC5u0009GL000095	COG3344	Reverse transcriptase (RNA-dependent DNA polymerase)
			AC5u0009GL000705	COG2256	Replication-associated recombination protein RarA (DNA-dependent ATPase)
			AC5u0009GL001032	COG0708	Exonuclease III
			AC5u0009GL001037	COG0389	Nucleotidyltransferase/DNA polymerase involved in DNA repair
			AC5u0009GL001045	COG2818	3-methyladenine DNA glycosylase Tag
			AC5u0009GL001352	COG0507	ATP-dependent exoDNAse (exonuclease V), alpha subunit, helicase superfamily I
			AC5u0009GL001389	COG1466	DNA polymerase III, delta subunit
			AC5u0009GL001553	COG0188	DNA gyrase/topoisomerase IV, subunit A
			AC5u0009GL001554	COG0187	DNA gyrase/topoisomerase IV, subunit B
			AC5u0009GL001557	COG0550	DNA topoisomerase IA
			AC5u0009GL001558	COG0758	Predicted Rossmann fold nucleotide-binding protein DprA/Smf involved in DNA uptake
			AC5u0009GL001559	COG0164	Ribonuclease HII
			AC5u0009GL001571	COG0776	Bacterial nucleoid DNA-binding protein
			AC5u0009GL001576	COG0514	Superfamily II DNA helicase RecQ
			AC5u0009GL001581	COG1354	Chromatin segregation and condensation protein Rec8/ScpA/Scc1, kleisin family
			AC5u0009GL001583	COG4974	Site-specific recombinase XerD
			AC5u0009GL001586	COG0587	DNA polymerase III, alpha subunit
			AC5u0009GL001593	COG0358	DNA primase (bacterial type)
			AC5u0009GL001596	COG1381	Recombinational DNA repair protein (RecF pathway)
			AC5u0009GL001734	COG3935	DnaD domain protein
			AC5u0009GL001736	COG0847	DNA polymerase III, epsilon subunit or related 3'-5' exonuclease
			AC5u0009GL001742	COG3666	Transposase
			AC5u0009GL001780	COG3886	PLD-like domain
			AC5u0009GL002054	COG2094	3-methyladenine DNA glycosylase Mpg
			AC5u0009GL000193	COG2176	DNA polymerase III, alpha subunit (gram-positive type)
			AC5u0009GL000203	COG2827	Predicted endonuclease, GIY-YIG superfamily
			AC5u0009GL000234	COG4974	Site-specific recombinase XerD
			AC5u0009GL000241	COG0582	Integrase
			AC5u0009GL000326	COG0210	Superfamily I DNA or RNA helicase
			AC5u0009GL000327	COG0272	NAD-dependent DNA ligase
			AC5u0009GL000335	COG2189	Adenine specific DNA methylase Mod
			AC5u0009GL000341	COG2801	PFAM Integrase catalytic region
			AC5u0009GL000342	COG2801	PFAM Integrase catalytic region
			AC5u0009GL000366	COG0513	Superfamily II DNA and RNA helicase
			AC5u0009GL000381	COG1197	Transcription-repair coupling factor (superfamily II helicase)
			AC5u0009GL000412	COG1074	ATP-dependent exoDNAse (exonuclease V) beta subunit (contains helicase and exonuclease domains)
			AC5u0009GL000413	COG3857	The heterodimer acts as both an ATP-dependent DNA helicase and an ATP-dependent, dual-direction single-stranded exonuclease. Recognizes the chi site generating a DNA molecule suitable for the initiation of homologous recombination. This subunit has 5' - 3' nuclease activity
			AC5u0009GL000481	COG1961	COG1961 Site-specific recombinases, DNA invertase Pin homologs
			AC5u0009GL000495	COG3935	DnaD domain protein
			AC5u0009GL000497	COG0582	Integrase
			AC5u0009GL000553	COG0305	Replicative DNA helicase
			AC5u0009GL000559	COG0629	Single-stranded DNA-binding protein
			AC5u0009GL000561	COG0188	DNA gyrase/topoisomerase IV, subunit A
			AC5u0009GL000562	COG0187	DNA gyrase/topoisomerase IV, subunit B
			AC5u0009GL000563	COG1195	Recombinational DNA repair ATPase RecF
			AC5u0009GL000565	COG0592	DNA polymerase III sliding clamp (beta) subunit, PCNA homolog
			AC5u0009GL000566	COG0593	Chromosomal replication initiation ATPase DnaA
			AC5u0009GL000602	COG2189	Adenine specific DNA methylase Mod
			AC5u0009GL000604	COG3973	DNA helicase IV
			AC5u0009GL000608	COG0177	Endonuclease III
			AC5u0009GL000759	COG2812	DNA polymerase III, gamma/tau subunits
			AC5u0009GL000761	COG0353	Recombinational DNA repair protein RecR
			AC5u0009GL000765	COG0470	DNA polymerase III, delta prime subunit
			AC5u0009GL000766	COG4467	Regulator of replication initiation timing
			AC5u0009GL000783	COG4098	Superfamily II DNA/RNA helicase required for DNA uptake (late competence protein)
			AC5u0009GL000805	COG0556	Excinuclease UvrABC helicase subunit UvrB
			AC5u0009GL000806	COG0178	Excinuclease UvrABC ATPase subunit
			AC5u0009GL000850	COG3344	PFAM RNA-directed DNA polymerase (Reverse transcriptase)
			AC5u0009GL000871	COG0470	DNA polymerase III, delta prime subunit
			AC5u0009GL000873	COG0178	Excinuclease UvrABC ATPase subunit
			AC5u0009GL000930	COG3886	HKD family nuclease
			AC5u0009GL000961	COG3973	DNA helicase IV
			AC5u0009GL000975	COG0692	Uracil DNA glycosylase
			AC5u0009GL000980	COG0847	DNA polymerase III, epsilon subunit or related 3'-5' exonuclease
			AC5u0009GL001000	COG0845	gp58-like protein
			AC5u0009GL001017	COG3728	Terminase small subunit
			AC5u0009GL001104	COG1573	Uracil-DNA glycosylase
			AC5u0009GL001123	COG4974	PFAM plasmid pRiA4b ORF-3 family protein
			AC5u0009GL001166	COG0513	Superfamily II DNA and RNA helicase
			AC5u0009GL001255	COG0582	Integrase
			AC5u0009GL001258	COG0608	Single-stranded DNA-specific exonuclease, DHH superfamily, may be involved in archaeal DNA replication intiation
			AC5u0009GL001262	COG0322	Excinuclease UvrABC, nuclease subunit
			AC5u0009GL001279	COG1525	Nuclease
			AC5u0009GL001280	COG0419	Putative exonuclease SbcCD, C subunit
			AC5u0009GL001281	COG0420	DNA repair exonuclease SbcCD nuclease subunit
			AC5u0009GL001287	COG3464	Transposase
			AC5u0009GL001300	COG3464	Transposase
			AC5u0009GL001396	COG0582	Belongs to the 'phage' integrase family
			AC5u0009GL001459	COG4974	Transposase IS66 family
			AC5u0009GL001460	COG4974	Transposase IS66 family
			AC5u0009GL001461	COG4974	Transposase IS66 family
			AC5u0009GL001525	COG0328	Ribonuclease HI
			AC5u0009GL001619	COG0338	Site-specific DNA-adenine methylase
			AC5u0009GL001620	COG1961	Site-specific DNA recombinase related to the DNA invertase Pin
			AC5u0009GL001639	COG1061	Type III restriction protein res subunit
			AC5u0009GL001645	COG4974	Plasmid pRiA4b ORF-3-like protein
			AC5u0009GL001646	COG4974	Plasmid pRiA4b ORF-3-like protein
			AC5u0009GL001713	COG2801	PFAM Integrase catalytic region
			AC5u0009GL001818	COG4974	Transposase IS66 family
			AC5u0009GL001837	COG0582	Integrase
			AC5u0009GL001846	COG1961	Site-specific DNA recombinase related to the DNA invertase Pin
			AC5u0009GL001942	COG2826	Transposase and inactivated derivatives, IS30 family
			AC5u0009GL001945	COG2189	Type III restriction/modification enzyme methylation subunit
			AC5u0009GL001961	COG0582	Integrase
			AC5u0009GL001966	COG0582	Integrase
			AC5u0009GL002005	COG1961	Site-specific DNA recombinase related to the DNA invertase Pin
			AC5u0009GL002014	COG0582	Belongs to the 'phage' integrase family
			AC5u0009GL002116	COG0708	Exonuclease III
			AC5u0009GL002181	COG0582	Integrase
			AC5u0009GL000153	COG1484	DNA replication protein DnaC
			AC5u0009GL000160	COG3464	PFAM Transposase, IS204 IS1001 IS1096 IS1165
			AC5u0009GL000214	COG2946	Replication initiation factor
			AC5u0009GL000279	COG4974	Transposase IS66 family
			AC5u0009GL000392	COG0629	Single-stranded DNA-binding protein
	Cellular processes and signaling	1. Cell wall/membrane/envelope biogenesis	AC5u0009GL000021	COG2815	PASTA domain, binds beta-lactams
			AC5u0009GL000072	COG0791	Cell wall-associated hydrolase, NlpC family
			AC5u0009GL000079	COG0706	Membrane protein insertase Oxa1/YidC/SpoIIIJ, required for the localization of integral membrane proteins
			AC5u0009GL001029	COG1388	LysM repeat
			AC5u0009GL001031	COG1388	LysM repeat
			AC5u0009GL001049	COG2244	Membrane protein involved in the export of O-antigen and teichoic acid
			AC5u0009GL001053	COG1705	Flagellum-specific peptidoglycan hydrolase FlgJ
			AC5u0009GL001331	COG2815	PASTA domain, binds beta-lactams
			AC5u0009GL001332	COG0472	UDP-N-acetylmuramyl pentapeptide phosphotransferase/UDP-N-acetylglucosamine-1-phosphate transferase
			AC5u0009GL001333	COG0771	UDP-N-acetylmuramoylalanine-D-glutamate ligase
			AC5u0009GL001334	COG0707	UDP-N-acetylglucosamine:LPS N-acetylglucosamine transferase
			AC5u0009GL001368	COG0791	NlpC P60 family protein
			AC5u0009GL001386	COG1596	Periplasmic protein involved in polysaccharide export, contains SLBB domain of the beta-grasp fold
			AC5u0009GL001575	COG1388	Lysin motif
			AC5u0009GL001605	COG3049	Penicillin V acylase or related amidase, Ntn superfamily
			AC5u0009GL001732	COG0744	Membrane carboxypeptidase (penicillin-binding protein)
			AC5u0009GL002040	COG1136	ABC-type lipoprotein export system, ATPase component
			AC5u0009GL002065	COG1705	Flagellum-specific peptidoglycan hydrolase FlgJ
			AC5u0009GL000096	COG1181	D-alanine-D-alanine ligase and related ATP-grasp enzymes
			AC5u0009GL000100	COG0759	Membrane-anchored protein YidD, putatitve component of membrane protein insertase Oxa1/YidC/SpoIIIJ
			AC5u0009GL000102	COG0766	UDP-N-acetylglucosamine enolpyruvyl transferase
			AC5u0009GL000121	COG0771	UDP-N-acetylmuramoylalanine-D-glutamate ligase
			AC5u0009GL000130	COG4932	domain protein
			AC5u0009GL000131	COG4932	domain protein
			AC5u0009GL000236	COG1621	Levansucrase/Invertase
			AC5u0009GL000237	COG1621	Levansucrase/Invertase
			AC5u0009GL000239	COG1621	Levansucrase/Invertase
			AC5u0009GL000323	COG1705	Flagellum-specific peptidoglycan hydrolase FlgJ
			AC5u0009GL000352	COG0766	UDP-N-acetylglucosamine enolpyruvyl transferase
			AC5u0009GL000356	COG3764	Sortase (surface protein transpeptidase)
			AC5u0009GL000365	COG0770	UDP-N-acetylmuramyl pentapeptide synthase
			AC5u0009GL000368	COG3966	Poly D-alanine transfer protein DltD, involved inesterification of teichoic acids
			AC5u0009GL000370	COG1696	D-alanyl-lipoteichoic acid acyltransferase DltB, MBOAT superfamily
			AC5u0009GL000374	COG0787	Alanine racemase
			AC5u0009GL000426	COG1376	Lipoprotein-anchoring transpeptidase ErfK/SrfK
			AC5u0009GL000530	COG3941	Phage tail tape measure protein TP901
			AC5u0009GL000569	COG0706	Membrane protein insertase Oxa1/YidC/SpoIIIJ, required for the localization of integral membrane proteins
			AC5u0009GL000574	COG0769	UDP-N-acetylmuramyl tripeptide synthase
			AC5u0009GL000577	COG1247	Acetyltransferase GNAT family
			AC5u0009GL000584	COG1207	Bifunctional protein GlmU, N-acetylglucosamine-1-phosphate-uridyltransferase/glucosamine-1-phosphate-acetyltransferase
			AC5u0009GL000716	COG1794	Aspartate/glutamate racemase
			AC5u0009GL000746	COG0381	UDP-N-acetylglucosamine 2-epimerase
			AC5u0009GL000750	COG1970	Large-conductance mechanosensitive channel
			AC5u0009GL000772	COG1087	UDP-glucose 4-epimerase
			AC5u0009GL000792	COG0682	Prolipoprotein diacylglyceryltransferase
			AC5u0009GL000794	COG1210	UTP-glucose-1-phosphate uridylyltransferase
			AC5u0009GL000918	COG1732	ABC transporter, substrate-binding protein, QAT family
			AC5u0009GL000964	COG1368	Phosphoglycerol transferase MdoB or a related enzyme of AlkP superfamily
			AC5u0009GL000981	COG0812	UDP-N-acetylenolpyruvoylglucosamine reductase
			AC5u0009GL000988	COG0449	Glucosamine 6-phosphate synthetase, contains amidotransferase and phosphosugar isomerase domains
			AC5u0009GL000993	COG1388	LysM repeat
			AC5u0009GL000996	COG3757	lysozyme activity
			AC5u0009GL001002	COG1511	Phage tail tape measure protein TP901
			AC5u0009GL001128	COG1316	Anionic cell wall polymer biosynthesis enzyme, LytR-Cps2A-Psr (LCP) family
			AC5u0009GL001130	COG0791	NlpC/P60 family
			AC5u0009GL001133	COG2849	domain, Protein
			AC5u0009GL001144	COG0438	Glycosyltransferase involved in cell wall bisynthesis
			AC5u0009GL001145	COG0438	Glycosyltransferase involved in cell wall bisynthesis
			AC5u0009GL001149	COG0739	Peptidase family M23
			AC5u0009GL001150	COG2148	Sugar transferase involved in LPS biosynthesis (colanic, teichoic acid)
			AC5u0009GL001152	COG1442	Domain of unknown function (DUF4422)
			AC5u0009GL001165	COG0381	UDP-N-acetylglucosamine 2-epimerase
			AC5u0009GL001178	COG0438	Glycosyltransferase involved in cell wall bisynthesis
			AC5u0009GL001179	COG4932	protein which possibly mediates interactions of S.aureus with components of the extracellular matrix of higher eukaryotes
			AC5u0009GL001310	COG1215	Glycosyl transferase
			AC5u0009GL001414	COG1091	dTDP-4-dehydrorhamnose reductase
			AC5u0009GL001415	COG1088	dTDP-D-glucose 4,6-dehydratase
			AC5u0009GL001416	COG1898	dTDP-4-dehydrorhamnose 3,5-epimerase or related enzyme
			AC5u0009GL001417	COG1209	dTDP-glucose pyrophosphorylase
			AC5u0009GL001419	COG0463	Glycosyltransferase involved in cell wall bisynthesis
			AC5u0009GL001420	COG1807	4-amino-4-deoxy-L-arabinose transferase and related glycosyltransferases of PMT family
			AC5u0009GL001422	COG1442	Domain of unknown function (DUF4422)
			AC5u0009GL001423	COG0463	Glycosyltransferase involved in cell wall bisynthesis
			AC5u0009GL001424	COG3944	biosynthesis protein
			AC5u0009GL001426	COG2244	Membrane protein involved in the export of O-antigen and teichoic acid
			AC5u0009GL001427	COG0562	UDP-galactopyranose mutase
			AC5u0009GL001432	COG1686	Belongs to the peptidase S11 family
			AC5u0009GL001445	COG1316	Anionic cell wall polymer biosynthesis enzyme, LytR-Cps2A-Psr (LCP) family
			AC5u0009GL001456	COG0562	UDP-galactopyranose mutase
			AC5u0009GL001457	COG0438	Glycosyltransferase involved in cell wall bisynthesis
			AC5u0009GL001481	COG1368	Phosphoglycerol transferase MdoB or a related enzyme of AlkP superfamily
			AC5u0009GL001522	COG0845	Belongs to the membrane fusion protein (MFP) (TC 8.A.1) family
			AC5u0009GL001523	COG1136	ABC-type lipoprotein export system, ATPase component
			AC5u0009GL001527	COG0597	Lipoprotein signal peptidase
			AC5u0009GL001536	COG1442	Lipopolysaccharide biosynthesis protein, LPS:glycosyltransferase
			AC5u0009GL001622	COG3559	Exporter of polyketide antibiotics
			AC5u0009GL001668	COG3944	Capsular polysaccharide biosynthesis protein
			AC5u0009GL001670	COG2148	Sugar transferase involved in LPS biosynthesis (colanic, teichoic acid)
			AC5u0009GL001672	COG0438	Stealth protein CR2, conserved region 2
			AC5u0009GL001673	COG1442	cog cog1442
			AC5u0009GL001676	COG3774	Glycosyltransferase sugar-binding region containing DXD motif
			AC5u0009GL001677	COG0463	Glycosyltransferase involved in cell wall bisynthesis
			AC5u0009GL001678	COG1216	COG0463 Glycosyltransferases involved in cell wall biogenesis
			AC5u0009GL001688	COG2222	Fructoselysine-6-P-deglycase FrlB and related proteins with duplicated sugar isomerase (SIS) domain
			AC5u0009GL001698	COG1686	Belongs to the peptidase S11 family
			AC5u0009GL001700	COG1376	Lipoprotein-anchoring transpeptidase ErfK/SrfK
			AC5u0009GL001714	COG3941	Phage tail tape measure protein TP901
			AC5u0009GL001849	COG1136	ABC-type lipoprotein export system, ATPase component
			AC5u0009GL001974	COG0791	PFAM NLP P60 protein
			AC5u0009GL001994	COG1388	Lysin motif
			AC5u0009GL002096	COG5632	N-acetylmuramoyl-L-alanine amidase CwlA
			AC5u0009GL000161	COG1196	Rib/alpha-like repeat
		2. Signal transduction mechanisms	AC5u0009GL000022	COG0631	Serine/threonine protein phosphatase PrpC
			AC5u0009GL000083	COG5002	Signal transduction histidine kinase
			AC5u0009GL000084	COG0745	DNA-binding response regulator, OmpR family, contains REC and winged-helix (wHTH) domain
			AC5u0009GL000707	COG0589	Nucleotide-binding universal stress protein, UspA family
			AC5u0009GL001052	COG0589	Nucleotide-binding universal stress protein, UspA family
			AC5u0009GL001380	COG1217	Predicted membrane GTPase involved in stress response
			AC5u0009GL001385	COG3480	Predicted secreted protein containing a PDZ domain
			AC5u0009GL001600	COG1702	Phosphate starvation-inducible protein PhoH, predicted ATPase
			AC5u0009GL001748	COG3275	LytS YhcK-type transmembrane receptor domain protein
			AC5u0009GL001749	COG3275	Sensor histidine kinase, LytS/YehU family
			AC5u0009GL001755	COG2197	DNA-binding response regulator, NarL/FixJ family, contains REC and HTH domains
			AC5u0009GL001773	COG0664	Ion transport 2 domain protein
			AC5u0009GL001909	COG2365	Pfam:Y_phosphatase3C
			AC5u0009GL002022	COG0589	Nucleotide-binding universal stress protein, UspA family
			AC5u0009GL002030	COG2365	Protein tyrosine/serine phosphatase
			AC5u0009GL002038	COG0745	DNA-binding response regulator, OmpR family, contains REC and winged-helix (wHTH) domain
			AC5u0009GL002039	COG0642	PhoQ Sensor
			AC5u0009GL000169	COG0317	(p)ppGpp synthase/hydrolase, HD superfamily
			AC5u0009GL000256	COG2197	DNA-binding response regulator, NarL/FixJ family, contains REC and HTH domains
			AC5u0009GL000362	COG0394	Protein-tyrosine-phosphatase
			AC5u0009GL000379	COG0517	CBS domain
			AC5u0009GL000403	COG0642	Histidine kinase
			AC5u0009GL000404	COG0745	DNA-binding response regulator, OmpR family, contains REC and winged-helix (wHTH) domain
			AC5u0009GL000454	COG2200	Putative diguanylate phosphodiesterase
			AC5u0009GL000455	COG2199	GGDEF domain
			AC5u0009GL000458	COG2200	EAL domain
			AC5u0009GL000476	COG5002	Signal transduction histidine kinase
			AC5u0009GL000477	COG5002	GHKL domain
			AC5u0009GL000478	COG5002	GHKL domain
			AC5u0009GL000479	COG0745	DNA-binding response regulator, OmpR family, contains REC and winged-helix (wHTH) domain
			AC5u0009GL000544	COG5002	Signal transduction histidine kinase
			AC5u0009GL000545	COG0745	DNA-binding response regulator, OmpR family, contains REC and winged-helix (wHTH) domain
			AC5u0009GL000555	COG3887	c-di-AMP phosphodiesterase, consists of a GGDEF-like and DHH domains
			AC5u0009GL000712	COG1409	3',5'-cyclic AMP phosphodiesterase CpdA
			AC5u0009GL000791	COG1493	Serine kinase of the HPr protein, regulates carbohydrate metabolism
			AC5u0009GL000808	COG1660	RNase adaptor protein for sRNA GlmZ degradation, contains a P-loop ATPase domain
			AC5u0009GL000985	COG1624	Diadenylate cyclase (c-di-AMP synthetase), DisA_N domain
			AC5u0009GL000994	COG0745	DNA-binding response regulator, OmpR family, contains REC and winged-helix (wHTH) domain
			AC5u0009GL000995	COG5002	Signal transduction histidine kinase
			AC5u0009GL001195	COG1073	Fermentation-respiration switch protein FrsA, has esterase activity, DUF1100 family
			AC5u0009GL001199	COG0589	Nucleotide-binding universal stress protein, UspA family
			AC5u0009GL001212	COG1073	Fermentation-respiration switch protein FrsA, has esterase activity, DUF1100 family
			AC5u0009GL001232	COG0589	Nucleotide-binding universal stress protein, UspA family
			AC5u0009GL001276	COG2184	Fido, protein-threonine AMPylation domain
			AC5u0009GL001282	COG4464	Tyrosine-protein phosphatase YwqE
			AC5u0009GL001288	COG1073	Fermentation-respiration switch protein FrsA, has esterase activity, DUF1100 family
			AC5u0009GL001318	COG0745	DNA-binding response regulator, OmpR family, contains REC and winged-helix (wHTH) domain
			AC5u0009GL001392	COG1854	S-ribosylhomocysteine lyase LuxS, autoinducer biosynthesis
			AC5u0009GL001465	COG0639	Calcineurin-like phosphoesterase superfamily domain
			AC5u0009GL001501	COG5002	Signal transduction histidine kinase
			AC5u0009GL001502	COG0745	DNA-binding response regulator, OmpR family, contains REC and winged-helix (wHTH) domain
			AC5u0009GL001509	COG4853	Two-component signal transduction system YycFG, regulatory protein YycI
			AC5u0009GL001648	COG0664	cAMP-binding domain of CRP or a regulatory subunit of cAMP-dependent protein kinases
			AC5u0009GL001955	COG0589	Nucleotide-binding universal stress protein, UspA family
			AC5u0009GL002009	COG0394	Protein-tyrosine-phosphatase
			AC5u0009GL002194	COG0394	Protein-tyrosine-phosphatase
		3. Posttranslational modification, protein turnover, chaperones	AC5u0009GL000050	COG2151	Metal-sulfur cluster biosynthetic enzyme
			AC5u0009GL000051	COG0225	Peptide methionine sulfoxide reductase MsrA
			AC5u0009GL000064	COG0705	Membrane associated serine protease, rhomboid family
			AC5u0009GL001028	COG0719	Uncharacterized protein family (UPF0051)
			AC5u0009GL001036	COG0071	Molecular chaperone IbpA, HSP20 family
			AC5u0009GL001059	COG1266	Membrane protease YdiL, CAAX protease family
			AC5u0009GL001750	COG0330	Regulator of protease activity HflC, stomatin/prohibitin superfamily
			AC5u0009GL001757	COG2151	Metal-sulfur cluster biosynthetic enzyme
			AC5u0009GL001758	COG0719	Fe-S cluster assembly scaffold protein SufB
			AC5u0009GL001759	COG0822	NifU homolog involved in Fe-S cluster formation
			AC5u0009GL001761	COG0719	Fe-S cluster assembly scaffold protein SufB
			AC5u0009GL001762	COG0396	Fe-S cluster assembly ATPase SufC
			AC5u0009GL002050	COG3590	Predicted metalloendopeptidase
			AC5u0009GL000141	COG5549	Predicted Zn-dependent protease
			AC5u0009GL000180	COG0484	DnaJ-class molecular chaperone with C-terminal Zn finger domain
			AC5u0009GL000181	COG0443	Molecular chaperone DnaK (HSP70)
			AC5u0009GL000182	COG0576	Molecular chaperone GrpE (heat shock protein)
			AC5u0009GL000195	COG0750	Membrane-associated protease RseP, regulator of RpoE activity
			AC5u0009GL000343	COG2077	Peroxiredoxin
			AC5u0009GL000364	COG0501	Zn-dependent protease with chaperone function
			AC5u0009GL000387	COG0465	ATP-dependent Zn proteases
			AC5u0009GL000388	COG1281	Redox-regulated molecular chaperone, HSP33 family
			AC5u0009GL000418	COG0542	ATP-dependent Clp protease ATP-binding subunit ClpA
			AC5u0009GL000521	COG0740	ATP-dependent protease ClpP, protease subunit
			AC5u0009GL000597	COG0846	NAD-dependent protein deacetylase, SIR2 family
			AC5u0009GL000734	COG1066	Predicted ATP-dependent serine protease
			AC5u0009GL000757	COG0695	Glutaredoxin
			AC5u0009GL000798	COG0492	Thioredoxin reductase
			AC5u0009GL000852	COG2761	Predicted dithiol-disulfide isomerase, DsbA family
			AC5u0009GL000913	COG0229	Peptide methionine sulfoxide reductase MsrB
			AC5u0009GL000925	COG5549	Predicted Zn-dependent protease
			AC5u0009GL000973	COG0691	tmRNA-binding protein
			AC5u0009GL001121	COG0652	Peptidyl-prolyl cis-trans isomerase (rotamase) - cyclophilin family
			AC5u0009GL001139	COG0542	ATP-dependent Clp protease ATP-binding subunit ClpA
			AC5u0009GL001153	COG2137	SOS response regulatory protein OraA/RecX, interacts with RecA
			AC5u0009GL001266	COG1219	ATP-dependent protease Clp, ATPase subunit
			AC5u0009GL001267	COG0544	FKBP-type peptidyl-prolyl cis-trans isomerase (trigger factor)
			AC5u0009GL001291	COG0542	ATP-dependent Clp protease ATP-binding subunit ClpA
			AC5u0009GL001391	COG5549	Zinc-dependent metalloprotease
			AC5u0009GL001474	COG0492	Thioredoxin reductase
			AC5u0009GL001491	COG3118	Negative regulator of GroEL, contains thioredoxin-like and TPR-like domains
			AC5u0009GL001511	COG0265	Periplasmic serine protease, S1-C subfamily, contain C-terminal PDZ domain
			AC5u0009GL001805	COG0459	Chaperonin GroEL (HSP60 family)
			AC5u0009GL001806	COG0234	Co-chaperonin GroES (HSP10)
			AC5u0009GL001868	COG0740	ATP-dependent protease ClpP, protease subunit
			AC5u0009GL001951	COG2151	Metal-sulfur cluster biosynthetic enzyme
			AC5u0009GL002085	COG0492	Thioredoxin reductase
		4. Defense mechanisms	AC5u0009GL000081	COG0534	MatE
			AC5u0009GL001030	COG1131	ABC-type multidrug transport system, ATPase component
			AC5u0009GL001041	COG4767	VanZ like family
			AC5u0009GL001344	COG0494	8-oxo-dGTP pyrophosphatase MutT and related house-cleaning NTP pyrophosphohydrolases, NUDIX family
			AC5u0009GL001938	COG1131	(ABC) transporter
			AC5u0009GL002041	COG0577	FtsX-like permease family
			AC5u0009GL000128	COG1680	CubicO group peptidase, beta-lactamase class C family
			AC5u0009GL000336	COG3587	Restriction endonuclease
			AC5u0009GL000375	COG2337	mRNA-degrading endonuclease, toxin component of the MazEF toxin-antitoxin module
			AC5u0009GL000496	COG0286	Type I restriction-modification system, DNA methylase subunit
			AC5u0009GL000515	COG1403	5-methylcytosine-specific restriction endonuclease McrA
			AC5u0009GL000546	COG1132	ABC-type multidrug transport system, ATPase and permease component
			AC5u0009GL000867	N/A	DNA/RNA non-specific endonuclease
			AC5u0009GL001135	COG1131	ABC-type multidrug transport system, ATPase component
			AC5u0009GL001177	COG2849	Antitoxin component YwqK of the YwqJK toxin-antitoxin module
			AC5u0009GL001204	COG1131	ABC-type multidrug transport system, ATPase component
			AC5u0009GL001205	COG1131	ABC-type multidrug transport system, ATPase component
			AC5u0009GL001264	COG1694	NTP pyrophosphatase, house-cleaning of non-canonical NTPs
			AC5u0009GL001433	COG2367	Beta-lactamase enzyme family
			AC5u0009GL001473	COG0450	Alkyl hydroperoxide reductase subunit AhpC (peroxiredoxin)
			AC5u0009GL001492	COG0534	Na+-driven multidrug efflux pump
			AC5u0009GL001524	COG0577	ABC-type antimicrobial peptide transport system, permease component
			AC5u0009GL001623	COG1131	ABC-type multidrug transport system, ATPase component
			AC5u0009GL001629	COG1132	ABC-type multidrug transport system, ATPase and permease component
			AC5u0009GL001630	COG1132	ABC-type multidrug transport system, ATPase and permease component
			AC5u0009GL001641	COG1131	ABC-type multidrug transport system, ATPase component
			AC5u0009GL001642	COG0842	ABC-type multidrug transport system, permease component
			AC5u0009GL001820	COG1680	CubicO group peptidase, beta-lactamase class C family
			AC5u0009GL001848	COG0577	ABC-type antimicrobial peptide transport system, permease component
			AC5u0009GL001850	COG0577	ABC-type antimicrobial peptide transport system, permease component
			AC5u0009GL001964	COG1131	ABC-type multidrug transport system, ATPase component
			AC5u0009GL001978	COG2161	Antitoxin component YafN of the YafNO toxin-antitoxin module, PHD/YefM family
			AC5u0009GL001984	COG0827	Type II restriction enzyme, methylase subunits
			AC5u0009GL002115	COG1694	NTP pyrophosphatase, house-cleaning of non-canonical NTPs
		5. Cell cycle control, cell division, chromosome partitioning	AC5u0009GL000010	COG1196	Chromosome segregation ATPase
			AC5u0009GL000067	COG0768	Cell division protein FtsI/penicillin-binding protein 2
			AC5u0009GL000664	COG1426	Cytoskeletal protein RodZ, contains Xre-like HTH and DUF4115 domains
			AC5u0009GL000684	COG4477	modulates the frequency and position of FtsZ ring formation. Inhibits FtsZ ring formation at polar sites. Interacts either with FtsZ or with one of its binding partners to promote depolymerization
			AC5u0009GL001325	COG1674	DNA segregation ATPase FtsK/SpoIIIE and related proteins
			AC5u0009GL001330	COG4839	Cell division protein FtsL
			AC5u0009GL001335	COG1589	Cell division protein that may be involved in stabilizing or promoting the assembly of the division complex
			AC5u0009GL001336	COG0849	Cell division ATPase FtsA
			AC5u0009GL001337	COG0206	Cell division GTPase FtsZ
			AC5u0009GL001338	COG1799	FtsZ-interacting cell division protein YlmF
			AC5u0009GL001341	COG3599	Cell division septum initiation DivIVA, interacts with FtsZ, MinD and other proteins
			AC5u0009GL001381	COG0772	Bacterial cell division protein FtsW, lipid II flippase
			AC5u0009GL001729	COG3599	Cell division septum initiation DivIVA, interacts with FtsZ, MinD and other proteins
			AC5u0009GL001922	COG0849	Cell division ATPase FtsA
			AC5u0009GL000098	COG0772	Bacterial cell division protein FtsW, lipid II flippase
			AC5u0009GL000101	COG1077	Actin-like ATPase involved in cell morphogenesis
			AC5u0009GL000383	COG2919	Septum formation initiator
			AC5u0009GL000874	COG0239	Fluoride ion exporter CrcB/FEX, affects chromosome condensation
			AC5u0009GL000875	COG0239	Fluoride ion exporter CrcB/FEX, affects chromosome condensation
			AC5u0009GL001261	COG0536	GTPase involved in cell partioning and DNA repair
			AC5u0009GL001265	COG0218	GTP-binding protein EngB required for normal cell division
			AC5u0009GL001284	COG1196	Nuclear chromosome segregation
			AC5u0009GL001539	COG2848	Uncharacterized conserved protein, UPF0210 family
			AC5u0009GL001540	COG2848	Uncharacterized conserved protein, UPF0210 family
			AC5u0009GL001657	COG1475	Chromosome segregation protein Spo0J, contains ParB-like nuclease domain
			AC5u0009GL001659	COG1475	Chromosome segregation protein Spo0J, contains ParB-like nuclease domain
			AC5u0009GL001669	COG0489	Chromosome partitioning ATPase, Mrp family, contains Fe-S cluster
			AC5u0009GL002092	COG3941	Phage tail tape measure protein, TP901 family
		6. Intracellular trafficking, secretion, and vesicular transport	AC5u0009GL000007	COG0541	Signal recognition particle GTPase
			AC5u0009GL000009	COG0552	Signal recognition particle GTPase
			AC5u0009GL001565	COG1272	Predicted membrane channel-forming protein YqfA, hemolysin III family
			AC5u0009GL001578	COG3601	Mediates riboflavin uptake, may also transport FMN and roseoflavin. Probably a riboflavin-binding protein that interacts with the energy-coupling factor (ECF) ABC-transporter complex. Unlike classic ABC transporters this ECF transporter provides the energy necessary to transport a number of different substrates. The substrates themselves are bound by transmembrane, not extracytoplasmic soluble pr…
			AC5u0009GL000308	COG0201	Preprotein translocase subunit SecY
			AC5u0009GL000576	COG0681	Signal peptidase I
			AC5u0009GL000739	COG0690	Preprotein translocase subunit SecE
			AC5u0009GL000786	COG0653	Preprotein translocase subunit SecA (ATPase, RNA helicase)
			AC5u0009GL000970	COG1314	Preprotein translocase subunit SecG
			AC5u0009GL001395	COG0810	LPXTG-motif cell wall anchor domain protein
			AC5u0009GL001518	COG4975	Sugar transport
		7. Cell motility	AC5u0009GL000457	COG1215	Glycosyltransferase, catalytic subunit of cellulose synthase and poly-beta-1,6-N-acetylglucosamine synthase
			AC5u0009GL000483	COG1192	Cellulose biosynthesis protein BcsQ
			AC5u0009GL000593	COG0084	Tat protein secretion system quality control protein TatD (DNase activity)
			AC5u0009GL000745	COG1215	Glycosyltransferase, catalytic subunit of cellulose synthase and poly-beta-1,6-N-acetylglucosamine synthase
			AC5u0009GL001296	COG1989	Type II secretory pathway prepilin signal peptidase PulO and related peptidases
			AC5u0009GL001418	COG1705	Mannosyl-glycoprotein endo-beta-N-acetylglucosaminidase
			AC5u0009GL001658	COG1192	Cellulose biosynthesis protein BcsQ
			AC5u0009GL001705	COG1388	Mannosyl-glycoprotein endo-beta-N-acetylglucosaminidase
			AC5u0009GL001841	COG1192	Cellulose biosynthesis protein BcsQ
			AC5u0009GL001947	COG1192	Cellulose biosynthesis protein BcsQ
			AC5u0009GL002119	COG1192	Cellulose biosynthesis protein BcsQ

## Sheet: Table S8
	Table S8 List of biochemical reactions associated in the constructed metabolic network of L. reuteri KUB-AC5.
	NAME	EQUATION	EC-NUMBER	GENE ASSOCIATION	SUBSYSTEM
	menaquinol oxidase (7:1 protons)	2 H+[c] + Menaquinol 7[c] + 0.5 O2[c] => H2O[c] + 2 H+[e] + Menaquinone 7[c]	7.1.1.5	AC5u0009GL000677 or AC5u0009GL000678 or AC5u0009GL000679 or AC5u0009GL000680 or AC5u0009GL000676	ABC transporters
	L-methionine transport via ABC system	ATP[c] + H2O[c] + L-Methionine[e] => ADP[c] + H+[c] + L-Methionine[c] + Phosphate[c]		AC5u0009GL000612 or AC5u0009GL000613 or AC5u0009GL000668 or AC5u0009GL001233 or AC5u0009GL001666 or AC5u0009GL001848 or AC5u0009GL002128 or AC5u0009GL000614	ABC transporters
	D-methionine transport via ABC system	ATP[c] + H2O[c] + D-Methionine[e] => ADP[c] + H+[c] + D-Methionine[c] + Phosphate[c]		AC5u0009GL000612 or AC5u0009GL000613 or AC5u0009GL000668 or AC5u0009GL001233 or AC5u0009GL001666 or AC5u0009GL001848 or AC5u0009GL002128 or AC5u0009GL000614	ABC transporters
	betaine (glycine betaine) transport in/out via proton symport	Glycine betaine[e] + H+[e] <=> Glycine betaine[c] + H+[c]		AC5u0009GL000918	ABC transporters
	glycine betaine transport via ABC system	ATP[c] + Glycine betaine[e] + H2O[c] => ADP[c] + Glycine betaine[c] + H+[c] + Phosphate[c]		AC5u0009GL000914 or AC5u0009GL000916 or AC5u0009GL000915 or AC5u0009GL002083	ABC transporters
	L-glutamine transport via ABC system	ATP[c] + L-Glutamine[e] + H2O[c] => ADP[c] + L-Glutamine[c] + H+[c] + Phosphate[c]	3.6.3.21	AC5u0009GL001235 or AC5u0009GL001236 or AC5u0009GL001667 or AC5u0009GL000165 or AC5u0009GL000668 or AC5u0009GL000728 or AC5u0009GL001233 or AC5u0009GL001666 or AC5u0009GL001685 or AC5u0009GL002128 or AC5u0009GL000165 or AC5u0009GL000668 or AC5u0009GL000728 or AC5u0009GL001233 or AC5u0009GL001666 or AC5u0009GL001685 or AC5u0009GL001849 or AC5u0009GL002128 or AC5u0009GL001234 or AC5u0009GL001235 or…	ABC transporters
	Cobalt transport via ABC system	ATP[c] + Co2+[e] + H2O[c] => ADP[c] + Co2+[c] + H+[c] + Phosphate[c]		AC5u0009GL001887 or AC5u0009GL001885 or AC5u0009GL000316 or AC5u0009GL000317 or AC5u0009GL001886 or AC5u0009GL000318 or AC5u0009GL001888	ABC transporters
	phosphate transport via ABC system	ATP[c] + H2O[c] + Phosphate[e] => ADP[c] + H+[c] + 2 Phosphate[c]	3.6.3.27 ; 7.3.2.1	AC5u0009GL001317 or AC5u0009GL001314 or AC5u0009GL001313 or AC5u0009GL001315 or AC5u0009GL001316	ABC transporters
	spermidine transport via ABC system	ATP[c] + H2O[c] + Spermidine[e] => ADP[c] + H+[c] + Phosphate[c] + Spermidine[c]	3.6.3.31	AC5u0009GL002082 or AC5u0009GL002080 or AC5u0009GL002081 or AC5u0009GL000915 or AC5u0009GL002083	ABC transporters
	alanine racemase	L-Alanine[c] <=> D-Alanine[c]	5.1.1.1	AC5u0009GL000374	Alanine metabolism
	D-alanine-D-lactate ligase (reversible)	D-Alanine[c] + ATP[c] + D-Lactate[c] <=> ADP[c] + D-Alanyl-D-lactate[c] + Phosphate[c]	6.1.2.1	AC5u0009GL000096	Alanine metabolism
	D-alanine:D-alanine ligase (ADP-forming)	ATP[c] + 2 D-Alanine[c] <=> ADP[c] + Phosphate[c] + D-Alanyl-D-alanine[c]	6.3.2.4	AC5u0009GL000096	Alanine metabolism
	glutamine synthetase	ATP[c] + L-Glutamate[c] + Ammonium[c] => ADP[c] + L-Glutamine[c] + H+[c] + Phosphate[c]	6.3.1.2	AC5u0009GL000057	Alanine, aspartate or glutamate metabolism
	glutamine-fructose-6-phosphate transaminase	D-Fructose 6-phosphate[c] + L-Glutamine[c] => D-Glucosamine 6-phosphate[c] + L-Glutamate[c]	2.6.1.16	AC5u0009GL000988	Alanine, aspartate or glutamate metabolism
	aspartate carbamoyltransferase	L-Aspartate[c] + Carbamoyl phosphate[c] => N-Carbamoyl-L-aspartate[c] + H+[c] + Phosphate[c]	2.1.3.2	AC5u0009GL001497	Alanine, aspartate or glutamate metabolism
	aspartase racemase	D-Aspartate[c] <=> L-Aspartate[c]	5.1.1.13	AC5u0009GL000716	Alanine, aspartate or glutamate metabolism
	asparagine synthase (glutamine-hydrolysing)	L-Aspartate[c] + ATP[c] + L-Glutamine[c] + H2O[c] => AMP[c] + L-Asparagine[c] + L-Glutamate[c] + H+[c] + Diphosphate[c]	6.3.5.4	AC5u0009GL000573	Alanine, aspartate or glutamate metabolism
	asparagine synthetase	L-Aspartate[c] + ATP[c] + Ammonium[c] => AMP[c] + L-Asparagine[c] + H+[c] + Diphosphate[c]	6.3.1.1	AC5u0009GL000452	Alanine, aspartate or glutamate metabolism
	succinate-semialdehyde dehydrogenase / glutarate-semialdehyde dehydrogenase	H2O[c] + Nicotinamide adenine dinucleotide phosphate[c] + Succinic semialdehyde[c] => 2 H+[c] + Nicotinamide adenine dinucleotide phosphate - reduced[c] + Succinate[c]	1.2.1.16; 1.2.1.79	AC5u0009GL001521	Alanine, aspartate or glutamate metabolism
	succinate-semialdehyde dehydrogenase (NAD) / pyrroline-5-carboxylate reductase	H2O[c] + Nicotinamide adenine dinucleotide[c] + Succinic semialdehyde[c] => 2 H+[c] + Nicotinamide adenine dinucleotide - reduced[c] + Succinate[c]	1.2.1.16; 1.2.1.24	AC5u0009GL001521	Alanine, aspartate or glutamate metabolism
	4-aminobutyrate aminotransferase / Ornithine transaminase	4-Aminobutanoate[c] + 2-Oxoglutarate[c] => L-Glutamate[c] + Succinic semialdehyde[c]	2.6.1.19	AC5u0009GL000606	Alanine, aspartate or glutamate metabolism
	glutaminase	L-Glutamine[c] + H2O[c] => L-Glutamate[c] + Ammonium[c]	1.4.1.13; 1.4.7.1; 3.5.1.2; 3.5.1.38; 4.3.3.6; 6.3.4.2; 6.3.5.2; 6.3.5.4; 6.3.5.5	AC5u0009GL000367	Alanine, aspartate or glutamate metabolism
	carbamoyl-phosphate synthase (glutamine-hydrolysing)	2 ATP[c] + L-Glutamine[c] + H2O[c] + Bicarbonate[c] => 2 ADP[c] + Carbamoyl phosphate[c] + L-Glutamate[c] + 2 H+[c] + Phosphate[c]	6.3.5.5	AC5u0009GL001182 or AC5u0009GL001183 or AC5u0009GL001529 or AC5u0009GL001530	Alanine, aspartate or glutamate metabolism
	gammaglutamyl-gamma-aminobutyrate hydrolase	gammaglutamyl-gamma-aminobutyrate[c] + H2O[c] => 4-Aminobutanoate[c] + L-Glutamate[c]	3.5.1.94	AC5u0009GL000400	Alanine, aspartate or glutamate metabolism
	glutamate decarboxylase	4-Aminobutanoate[c] + CO2[c] => L-Glutamate[c]	4.1.1.15	AC5u0009GL000688 or AC5u0009GL000689	Alanine, aspartate or glutamate metabolism
	aspartate transaminase	4-Hydroxy-L-glutamate[c] + 2-Oxoglutarate[c] <=> D-4-Hydroxy-2-oxoglutarate[c] + L-Glutamate[c]	2.6.1.1	AC5u0009GL000780	Alanine, aspartate or glutamate metabolism
	aspartate transaminase	2-Oxoglutarate[c] + L-Aspartate[c] <=> L-Glutamate[c] + Oxaloacetate[c]	2.6.1.1	AC5u0009GL000780	Alanine, aspartate or glutamate metabolism
	L-asparaginase	L-Asparagine[c] + H2O[c] => L-Aspartate[c] + Ammonium[c]	3.5.1.1; 3.5.1.38; 3.5.5.4	AC5u0009GL000465	Alanine, aspartate or glutamate metabolism
	UDP-N-acetylglucosamine diphosphorylase	N-Acetyl-D-glucosamine 1-phosphate[c] + H+[c] + UTP[c] => Diphosphate[c] + UDP-N-acetyl-D-glucosamine[c]	2.7.7.23	AC5u0009GL000584	Amino sugar or nucleotide sugar metabolism
	glucosamine-1-phosphate N-acetyltransferase	Acetyl-CoA[c] + D-Glucosamine 1-phosphate[c] => N-Acetyl-D-glucosamine 1-phosphate[c] + Coenzyme A[c] + H+[c]	2.3.1.157	AC5u0009GL000584	Amino sugar or nucleotide sugar metabolism
	UDP-N-acetylglucosamine 2-epimerase	UDP-N-acetyl-D-glucosamine[c] <=> UDP-N-acetyl-D-mannosamine[c]	5.1.3.14	AC5u0009GL000746 or AC5u0009GL001165	Amino sugar or nucleotide sugar metabolism
	UDPglucose 4-epimerase	UDP-N-acetyl-D-glucosamine[c] <=> UDP-N-acetyl-D-galactosamine[c]	5.1.3.2	AC5u0009GL000772	Amino sugar or nucleotide sugar metabolism
	acetyl-CoA:D-glucosamine-6-phosphate N-acetyltransferase	Acetyl-CoA[c] + D-Glucosamine 6-phosphate[c] <=> Coenzyme A[c] + N-Acetyl-D-glucosamine 6-phosphate[c]	2.3.1.4	AC5u0009GL000584	Amino sugar or nucleotide sugar metabolism
	glucosamine-6-phosphate deaminase	D-Glucosamine 6-phosphate[c] + H2O[c] => D-Fructose 6-phosphate[c] + Ammonium[c]	3.5.99.6	AC5u0009GL001275	Amino sugar or nucleotide sugar metabolism
	phosphoglucosamine mutase	D-Glucosamine 1-phosphate[c] <=> D-Glucosamine 6-phosphate[c]	5.4.2.10	AC5u0009GL000987	Amino sugar or nucleotide sugar metabolism
	Leucyl-tRNA synthetase	ATP[c] + L-Leucine[c] + tRNA(Leu)[c] => AMP[c] + L-Leucyl-tRNA(Leu)[c] + Diphosphate[c]	6.1.1.4	AC5u0009GL001047	Aminoacyl-tRNA biosynthesis
	Seryl-tRNA synthetase	ATP[c] + L-Serine[c] + tRNA(Ser)[c] => AMP[c] + Diphosphate[c] + L-Seryl-tRNA(Ser)[c]	6.1.1.11	AC5u0009GL001193 or AC5u0009GL002113	Aminoacyl-tRNA biosynthesis
	Isoleucyl-tRNA synthetase	ATP[c] + L-Isoleucine[c] + tRNA(Ile)[c] => AMP[c] + L-Isoleucyl-tRNA(Ile)[c] + Diphosphate[c]	6.1.1.5	AC5u0009GL001342	Aminoacyl-tRNA biosynthesis
	Glutamyl-tRNA synthetase	ATP[c] + L-Glutamate[c] + tRNA (Glu)[c] => AMP[c] + L-Glutamyl-tRNA(Glu)[c] + Diphosphate[c]	6.1.1.17 ; 6.1.1.24 ; 6.1.1.-	AC5u0009GL000056	Aminoacyl-tRNA biosynthesis
	Arginyl-tRNA synthetase	L-Arginine[c] + ATP[c] + tRNA(Arg)[c] => AMP[c] + L-Arginyl-tRNA(Arg)[c] + Diphosphate[c]	6.1.1.19	AC5u0009GL000842 or AC5u0009GL001073	Aminoacyl-tRNA biosynthesis
	Phenylalanyl-tRNA synthetase	ATP[c] + L-Phenylalanine[c] + tRNA(Phe)[c] => AMP[c] + L-Phenylalanyl-tRNA(Phe)[c] + Diphosphate[c]	6.1.1.20	AC5u0009GL000073 or AC5u0009GL000827 or AC5u0009GL001088 or AC5u0009GL000074	Aminoacyl-tRNA biosynthesis
	Lysyl-tRNA synthetase	ATP[c] + L-Lysine[c] + tRNA(Lys)[c] => AMP[c] + L-Lysine-tRNA (Lys)[c] + Diphosphate[c]	6.1.1.6	AC5u0009GL000390	Aminoacyl-tRNA biosynthesis
	Asparaginyl-tRNA synthetase	L-Asparagine[c] + ATP[c] + tRNA(Asn)[c] => AMP[c] + L-Asparaginyl-tRNA(Asn)[c] + Diphosphate[c]	6.1.1.22	AC5u0009GL000453	Aminoacyl-tRNA biosynthesis
	Threonyl-tRNA synthetase	ATP[c] + L-Threonine[c] + tRNA(Thr)[c] => AMP[c] + Diphosphate[c] + L-Threonyl-tRNA(Thr)[c]	6.1.1.3	AC5u0009GL000429	Aminoacyl-tRNA biosynthesis
	Valyl-tRNA synthetase	ATP[c] + tRNA(Val)[c] + L-Valine[c] => AMP[c] + Diphosphate[c] + L-Valyl-tRNA(Val)[c]	6.1.1.9	AC5u0009GL000681	Aminoacyl-tRNA biosynthesis
	Alanyl-tRNA synthetase	L-Alanine[c] + ATP[c] + tRNA(Ala)[c] => L-Alanyl-tRNA(Ala)[c] + AMP[c] + Diphosphate[c]	6.1.1.7	AC5u0009GL000651 or AC5u0009GL002145	Aminoacyl-tRNA biosynthesis
	Prolyl-tRNA synthetase	ATP[c] + L-Proline[c] + tRNA(Pro)[c] => AMP[c] + Diphosphate[c] + L-Prolyl-tRNA(Pro)[c]	6.1.1.15	AC5u0009GL000194	Aminoacyl-tRNA biosynthesis
	Glycyl-tRNA synthetase	ATP[c] + Glycine[c] + tRNA(Gly)[c] => AMP[c] + Glycyl-tRNA(Gly)[c] + Diphosphate[c]	6.1.1.14	AC5u0009GL001595 or AC5u0009GL001594	Aminoacyl-tRNA biosynthesis
	glutamyl-tRNA(Gln):L-glutamine amido-ligase (ADP-forming)	ATP[c] + L-Glutamine[c] + L-Glutamyl-tRNA(Glu)[c] + H2O[c] <=> ADP[c] + L-Glutaminyl-tRNA(Gln)[c] + L-Glutamate[c] + H+[c] + Phosphate[c]	6.3.5.7 or 6.3.5.6	AC5u0009GL000331 or AC5u0009GL000330 or AC5u0009GL000329	Aminoacyl-tRNA biosynthesis
	Cysteinyl-tRNA synthetase	ATP[c] + L-Cysteine[c] + tRNA(Cys)[c] => AMP[c] + L-Cysteinyl-tRNA(Cys)[c] + Diphosphate[c]	6.1.1.16	AC5u0009GL000736	Aminoacyl-tRNA biosynthesis
	Tyrosyl-tRNA synthetase	ATP[c] + tRNA(Tyr)[c] + L-Tyrosine[c] => AMP[c] + Diphosphate[c] + L-Tyrosyl-tRNA(Tyr)[c]	6.1.1.1	AC5u0009GL000886	Aminoacyl-tRNA biosynthesis
	Histidyl-tRNA synthetase	ATP[c] + L-Histidine[c] + tRNA(His)[c] => AMP[c] + L-Histidyl-tRNA(His)[c] + Diphosphate[c]	6.1.1.21	AC5u0009GL001710	Aminoacyl-tRNA biosynthesis
	Aspartyl-tRNA synthetase	L-Aspartate[c] + ATP[c] + tRNA(Asp)[c] => AMP[c] + L-Aspartyl-tRNA(Asp)[c] + Diphosphate[c]	6.1.1.12	AC5u0009GL000166	Aminoacyl-tRNA biosynthesis
	Methionyl-tRNA synthetase	ATP[c] + L-Methionine[c] + tRNA(Met)[c] => AMP[c] + L-Methionyl-tRNA (Met)[c] + Diphosphate[c]	6.1.1.10	AC5u0009GL000594	Aminoacyl-tRNA biosynthesis
	Tryptophanyl-tRNA synthetase	ATP[c] + tRNA(Trp)[c] + L-Tryptophan[c] => AMP[c] + Diphosphate[c] + L-Tryptophanyl-tRNA(Trp)[c]	6.1.1.2	AC5u0009GL000601	Aminoacyl-tRNA biosynthesis
	Glutamyl-tRNA synthetase	ATP[c] + L-Glutamate[c] + tRNA(Gln)[c] <=> AMP[c] + Diphosphate[c] + L-Glutamyl-tRNA(Gln)[c]	6.1.1.24 ; 6.1.1.-; 6.1.1.17	AC5u0009GL000056	Aminoacyl-tRNA biosynthesis
	Asp-tRNA(Asn):L-glutamine amido-ligase (ADP-forming)	L-Asparaginyl-tRNA(Asn)[c] + L-Glutamate[c] + Phosphate[c] + ADP[c] <=> L-Aspartyl-tRNA(Asn)[c] + L-Glutamine[c] + ATP[c] + H2O[c]	6.3.5.6 or 6.3.5.7	AC5u0009GL000331 or AC5u0009GL000330 or AC5u0009GL000329	Aminoacyl-tRNA biosynthesis
	arginine deiminase	L-Arginine[c] + H2O[c] => L-Citrulline[c] + Ammonium[c]	3.5.3.6	AC5u0009GL000127	Arginine biosynthesis
	argininosuccinate lyase	N(omega)-(L-Arginino)succinate[c] <=> L-Arginine[c] + Fumarate[c]	4.3.2.1	AC5u0009GL001603	Arginine biosynthesis
	argininosuccinate synthase	L-Aspartate[c] + ATP[c] + L-Citrulline[c] => AMP[c] + N(omega)-(L-Arginino)succinate[c] + H+[c] + Diphosphate[c]	6.3.4.5	AC5u0009GL001604	Arginine biosynthesis
	ornithine transacetylase	L-Glutamate[c] + N2-Acetyl-L-ornithine[c] <=> L-Ornithine[c] + N-Acetyl-L-glutamate[c]	2.3.1.35	AC5u0009GL000606 or AC5u0009GL001879	Arginine biosynthesis
	acetylornithine transaminase	2-Oxoglutarate[c] + N2-Acetyl-L-ornithine[c] <=> L-Glutamate[c] + N-Acetyl-L-glutamate 5-semialdehyde[c]	2.6.1.11	AC5u0009GL000615 or AC5u0009GL000799	Arginine biosynthesis
	ornithine carbamoyltransferase	Carbamoyl phosphate[c] + L-Ornithine[c] <=> L-Citrulline[c] + H+[c] + Phosphate[c]	2.1.3.3	AC5u0009GL000144	Arginine biosynthesis
	Carbamate kinase	ATP[c] + CO2[c] + Ammonium[c] <=> ADP[c] + Carbamoyl phosphate[c] + 2 H+[c]	2.7.2.2	AC5u0009GL000143	Arginine biosynthesis
	4-carboxymuconolactone decarboxylase	2-Carboxy-2,5-dihydro-5-oxofuran-2-acetate[c] => CO2[c] + H+[c] + 5-Oxo-4,5-dihydrofuran-2-acetate[c]	4.1.1.44	AC5u0009GL000883	Benzoate degradation
	4-oxalocrotonate tautomerase	2-Hydroxymuconate[c] <=> gamma-Oxalocrotonate[c]	5.3.2.6	AC5u0009GL001477	Benzoate degradation
	4-aminobutyrate aminotransferase / Ornithine transaminase	beta-Alanine[c] + 2-Oxoglutarate[c] <=> 3-Oxopropanoate[c] + L-Glutamate[c]	2.6.1.19; 2.6.1.55	AC5u0009GL000606	Beta-Alanine metabolism
	glutamate decarboxylase	L-Aspartate[c] <=> beta-Alanine[c] + CO2[c]	4.1.1.15	AC5u0009GL000688 or AC5u0009GL000689	Beta-Alanine metabolism
	choloylglycine hydrolase	Glycocholate[c] + H2O[c] <=> Cholic acid[c] + Glycine[c]	3.5.1.24	AC5u0009GL000416	Bile acid biosynthesis
	choloylglycine hydrolase	Taurocholate[c] + H2O[c] <=> Cholic acid[c] + Taurine[c]	3.5.1.24	AC5u0009GL000416	Bile acid biosynthesis
	choloylglycine hydrolase	Glycochenodeoxycholate[c] + H2O[c] <=> Chenodeoxycholate[c] + Glycine[c]	3.5.1.24	AC5u0009GL000416	Bile acid biosynthesis
	choloylglycine hydrolase	Taurochenodeoxycholate[c] + H2O[c] <=> Chenodeoxycholate[c] + Taurine[c]	3.5.1.24	AC5u0009GL000416	Bile acid biosynthesis
	choloylglycine hydrolase	Glycodeoxycholate[c] + H2O[c] <=> Deoxycholic acid[c] + Glycine[c]	3.5.1.24	AC5u0009GL000416	Bile acid biosynthesis
	choloylglycine hydrolase	Taurodeoxycholate[c] + H2O[c] <=> Deoxycholic acid[c] + Taurine[c]	3.5.1.24	AC5u0009GL000416	Bile acid biosynthesis
	Biotin-(acetyl-CoA carboxylase) ligase	ATP[c] + Biotin[c] <=> Diphosphate[c] + Biotinyl-5'-AMP[c]	6.3.4.15	AC5u0009GL001601	Biotin metabolism
	Biotin-(acetyl-CoA carboxylase) ligase	Biotinyl-5'-AMP[c] + Apo-[carboxylase][c] <=> AMP[c] + Holo-[carboxylase][c]	6.3.4.15	AC5u0009GL001601	Biotin metabolism
	acetolactate decarboxylase	(S)-2-Acetolactate[c] + H+[c] => (R)-Acetoin[c] + CO2[c]	4.1.1.5	AC5u0009GL000906	Butanoate metabolism
	(R,R)-butanediol dehydrogenase	(R,R)-2,3-Butanediol[c] + Nicotinamide adenine dinucleotide[c] <=> (R)-Acetoin[c] + H+[c] + Nicotinamide adenine dinucleotide - reduced[c]	1.1.1.4	AC5u0009GL000322	Butanoate metabolism
	meso-butanediol dehydrogenase / (S,S)-butanediol dehydrogenase / diacetyl reductase / acetoin dehydrogenase	(R)-Acetoin[c] + Nicotinamide adenine dinucleotide[c] <=> Diacetyl[c] + H+[c] + Nicotinamide adenine dinucleotide - reduced[c]	1.1.1.303	AC5u0009GL000322	Butanoate metabolism
	acetolactate synthase (Also catalyzes ACHBS)	H+[c] + 2 Pyruvate[c] => (S)-2-Acetolactate[c] + CO2[c]	2.2.1.6	AC5u0009GL000907	Butanoate metabolism
	3-hydroxyacyl-CoA dehydrogenase (acetoacetyl-CoA)	Acetoacetyl-CoA[c] + H+[c] + Nicotinamide adenine dinucleotide - reduced[c] <=> (S)-3-Hydroxybutyryl-CoA[c] + Nicotinamide adenine dinucleotide[c]	1.1.1.35 ; 1.1.1.157	AC5u0009GL001661	Butanoate metabolism
	methionine adenosyltransferase	ATP[c] + H2O[c] + L-Methionine[c] => S-Adenosyl-L-methionine[c] + Phosphate[c] + Diphosphate[c]	2.5.1.6	AC5u0009GL001046	Cysteine or methionine metabolism
	ribosylhomocysteinase	H2O[c] + S-Ribosyl-L-homocysteine[c] => L-Homocysteine[c] + D-Ribose[c]	4.4.1.21	AC5u0009GL001392	Cysteine or methionine metabolism
	adenosylhomocysteine nucleosidase	S-Adenosyl-L-homocysteine[c] + H2O[c] => Adenine[c] + S-Ribosyl-L-homocysteine[c]	3.2.2.9	AC5u0009GL001346	Cysteine or methionine metabolism
	formylmethionine deformylase	N-Formyl-L-methionine[c] + H2O[c] => Formate[c] + L-Methionine[c]	3.5.1.31 ; 3.5.1.88	AC5u0009GL000080 or AC5u0009GL001373	Cysteine or methionine metabolism
	5-methyltetrahydropteroyltriglutamate-homocysteine S-methyltransferase	5-Methyltetrahydropteroyltri-L-glutamate[c] + L-Homocysteine[c] => L-Methionine[c] + Tetrahydropteroyltri-L-glutamate[c]	2.1.1.14	AC5u0009GL000437	Cysteine or methionine metabolism
	cystathionine b-lyase	L-Cystathionine[c] + H2O[c] => L-Homocysteine[c] + Ammonium[c] + Pyruvate[c]	4.4.1.13	AC5u0009GL000726	Cysteine or methionine metabolism
	cystathionine g-lyase	L-Cystathionine[c] + H2O[c] => 2-Oxobutanoate[c] + L-Cysteine[c] + Ammonium[c]	4.4.1.1	AC5u0009GL000726	Cysteine or methionine metabolism
	aspartate transaminase	2-Oxoglutarate[c] + L-Cysteine[c] <=> L-Glutamate[c] + Mercaptopyruvate[c]	2.6.1.1	AC5u0009GL000780	Cysteine or methionine metabolism
	O-phospho-L-serine:hydrogen-sulfide 2-amino-2-carboxyethyltransferase	O-Phospho-L-serine[c] + Hydrogen sulfide[c] <=> L-Cysteine[c] + Phosphate[c]	2.5.1.47; 2.5.1.65	AC5u0009GL001444 or AC5u0009GL002043	Cysteine or methionine metabolism
	cysteine synthase	O-Acetyl-L-serine[c] + Hydrogen sulfide[c] => Acetate[c] + L-Cysteine[c] + H+[c]	2.5.1.47; 2.5.1.65	AC5u0009GL001444 or AC5u0009GL002043	Cysteine or methionine metabolism
	glutamate-cysteine ligase	ATP[c] + L-Cysteine[c] + L-Glutamate[c] => ADP[c] + gamma-L-Glutamyl-L-cysteine[c] + H+[c] + Phosphate[c]	6.3.2.2	AC5u0009GL000401 or AC5u0009GL001171	Cysteine or methionine metabolism
	methylthioadenosine nucleosidase	5-Methylthioadenosine[c] + H2O[c] => 5-Methylthio-D-ribose[c] + Adenine[c]	3.2.2.16; 3.2.2.9	AC5u0009GL001346	Cysteine or methionine metabolism
	O-Acetyl-L-homoserine acetate-lyase (adding methanethiol)	O-Acetyl-L-homoserine[c] + Hydrogen sulfide[c] <=> Acetate[c] + H+[c] + L-Homocysteine[c]	2.5.1.49	AC5u0009GL000439	Cysteine or methionine metabolism
	Acetyl-CoA:L-homoserine O-acetyltransferase	Acetyl-CoA[c] + L-Homoserine[c] <=> O-Acetyl-L-homoserine[c] + Coenzyme A[c]	2.3.1.46	AC5u0009GL002042	Cysteine or methionine metabolism
	inorganic diphosphatase	H2O[c] + Diphosphate[c] => H+[c] + 2 Phosphate[c]	3.6.1.1	AC5u0009GL001551	Energy metabolism
	ATP synthase (three protons for one ATP)	ADP[c] + 3 H+[e] + Phosphate[c] <=> ATP[c] + H2O[c] + 2 H+[c]	7.1.2.2	AC5u0009GL000103 or AC5u0009GL000106 or AC5u0009GL000107 or AC5u0009GL000108 or AC5u0009GL000110 or AC5u0009GL000105 or AC5u0009GL000104	Energy metabolism
	ATP maintenance requirment	0.35 ATP[c] + 0.35 H2O[c] => 0.35 ADP[c] + 0.35 H+[c] + 0.35 Phosphate[c]	3.6.1.15; 3.6.1.3; 3.6.1.5; 3.6.1.8; 3.6.3.1; 3.6.3.10; 3.6.3.11; 3.6.3.12; 3.6.3.14; 3.6.3.15; 3.6.3.16; 3.6.3.17; 3.6.3.18; 3.6.3.19; 3.6.3.2; 3.6.3.20; 3.6.3.21; 3.6.3.22; 3.6.3.23; 3.6.3.24; 3.6.3.25; 3.6.3.26; 3.6.3.27; 3.6.3.28; 3.6.3.29; 3.6.3.3; 3.6.3.30; 3.6.3.31; 3.6.3.32; 3.6.3.33; 3.6.3.34; 3.6.3.35; 3.6.3.36; 3.6.3.37; 3.6.3.38; 3.6.3.39; 3.6.3.4; 3.6.3.40; 3.6.3.41; 3.6.3.42; 3.6.3.…	AC5u0009GL001532	Energy metabolism
	NADH oxidase (H2O forming)	2 H+[c] + 2 Nicotinamide adenine dinucleotide - reduced[c] + O2[c] => 2 H2O[c] + 2 Nicotinamide adenine dinucleotide[c]	1.6.3.4	AC5u0009GL000396	Energy metabolism
	polyphosphate kinase	ATP[c] + Diphosphate[c] <=> ADP[c] + Inorganic triphosphate[c]	2.7.4.1	AC5u0009GL000770	Energy metabolism
	Quinone oxidoreductase	H+[c] + Nicotinamide adenine dinucleotide phosphate - reduced[c] + Ubiquinone-8[c] => Nicotinamide adenine dinucleotide phosphate[c] + Ubiquinol-8[c]	7.1.1.2	AC5u0009GL001208	Energy metabolism
	Malonyl-CoA:[acyl-carrier-protein] S-malonyltransferase	acyl carrier protein[c] + Malonyl-CoA[c] <=> Coenzyme A[c] + Malonyl-[acyl-carrier protein][c]	2.3.1.-; 2.3.1.0; 2.3.1.39; 2.3.1.85; 2.3.1.86	AC5u0009GL000229	Fatty acid metabolism
	beta-ketoacyl-ACP synthase III	Acetyl-CoA[c] + H+[c] + Malonyl-[acyl-carrier protein][c] => Acetoacetyl-[acyl-carrier protein][c] + CO2[c] + Coenzyme A[c]	2.3.1.180	AC5u0009GL000231	Fatty acid metabolism
	(3R)-3-Hydroxybutanoyl-[acyl-carrier protein]:NADP+ oxidoreductase	Acetoacetyl-[acyl-carrier protein][c] + H+[c] + Nicotinamide adenine dinucleotide phosphate - reduced[c] => (3R)-3-Hydroxybutanoyl-[acyl-carrier protein][c] + Nicotinamide adenine dinucleotide phosphate[c]	1.1.1.100	AC5u0009GL000944 or AC5u0009GL000228	Fatty acid metabolism
	(3R)-3-Hydroxybutanoyl-[acyl-carrier-protein] hydro-lyase	(3R)-3-Hydroxybutanoyl-[acyl-carrier protein][c] => But-2-enoyl-[acyl-carrier protein][c] + H2O[c]	2.3.1.85 ; 4.2.1.59	AC5u0009GL001030 or AC5u0009GL000225 or AC5u0009GL000233	Fatty acid metabolism
	Butyryl-[acyl-carrier protein]:malonyl-CoA C-acyltransferase	But-2-enoyl-[acyl-carrier protein][c] + H+[c] + Nicotinamide adenine dinucleotide - reduced[c] => Butyryl-[acyl-carrier protein][c] + Nicotinamide adenine dinucleotide[c]	1.3.1.9 ; 1.3.1.10	AC5u0009GL000221	Fatty acid metabolism
	Butyryl-[acyl-carrier protein]:malonyl-[acyl-carrier-protein]C-acyltransferase (decarboxylating)	Butyryl-[acyl-carrier protein][c] + H+[c] + Malonyl-[acyl-carrier protein][c] => 3-Oxohexanoyl-[acyl-carrier protein][c] + acyl carrier protein[c] + CO2[c]	2.3.1.41; 2.3.1.85; 2.3.1.86; 2.3.1.179; 2.3.1.-	AC5u0009GL000227	Fatty acid metabolism
	(3R)-3-Hydroxyhexanoyl-[acyl-carrier-protein]:NADP+ oxidoreductase	3-Oxohexanoyl-[acyl-carrier protein][c] + H+[c] + Nicotinamide adenine dinucleotide phosphate - reduced[c] => (R)-3-Hydroxyhexanoyl-[acp][c] + Nicotinamide adenine dinucleotide phosphate[c]	1.1.1.100	AC5u0009GL000944 or AC5u0009GL000228	Fatty acid metabolism
	(3R)-3-Hydroxybutanoyl-[acyl-carrier-protein] hydro-lyase	(R)-3-Hydroxyhexanoyl-[acp][c] => trans-Hex-2-enoyl-[acp][c] + H2O[c]	2.3.1.85 ; 4.2.1.59	AC5u0009GL001030 or AC5u0009GL000225 or AC5u0009GL000233	Fatty acid metabolism
	Hexanoyl-[acyl-carrier protein]:malonyl-CoA C-acyltransferase	trans-Hex-2-enoyl-[acp][c] + H+[c] + Nicotinamide adenine dinucleotide - reduced[c] => Hexanoyl-[acyl-carrier protein][c] + Nicotinamide adenine dinucleotide[c]	1.3.1.9 ; 1.3.1.10	AC5u0009GL000221	Fatty acid metabolism
	Hexanoyl-[acyl-carrier protein]:malonyl-[acyl-carrier-protein] C-acyltransferase	H+[c] + Hexanoyl-[acyl-carrier protein][c] + Malonyl-[acyl-carrier protein][c] => 3-Oxooctanoyl-[acyl-carrier protein][c] + acyl carrier protein[c] + CO2[c]	2.3.1.41; 2.3.1.85; 2.3.1.86; 2.3.1.179; 2.3.1.-	AC5u0009GL000227	Fatty acid metabolism
	(3R)-3-Hydroxyoctanoyl-[acyl-carrier-protein]:NADP+ oxidoreductase	3-Oxooctanoyl-[acyl-carrier protein][c] + H+[c] + Nicotinamide adenine dinucleotide phosphate - reduced[c] => (R)-3-Hydroxyoctanoyl-[acyl-carrier protein][c] + Nicotinamide adenine dinucleotide phosphate[c]	1.1.1.100	AC5u0009GL000944 or AC5u0009GL000228	Fatty acid metabolism
	(3R)-3-Hydroxybutanoyl-[acyl-carrier-protein] hydro-lyase	(R)-3-Hydroxyoctanoyl-[acyl-carrier protein][c] => trans-Oct-2-enoyl-[acp][c] + H2O[c]	2.3.1.85 ; 4.2.1.59	AC5u0009GL001030 or AC5u0009GL000225 or AC5u0009GL000233	Fatty acid metabolism
	Octanoyl-[acyl-carrier protein]:malonyl-CoA C-acyltransferase	trans-Oct-2-enoyl-[acp][c] + H+[c] + Nicotinamide adenine dinucleotide - reduced[c] => Nicotinamide adenine dinucleotide[c] + Octanoyl-[acyl-carrier protein][c]	1.3.1.9 ; 1.3.1.10	AC5u0009GL000221	Fatty acid metabolism
	Octanoyl-[acyl-carrier protein]:malonyl-[acyl-carrier-protein] C-acyltransferase (decarboxylating)	H+[c] + Malonyl-[acyl-carrier protein][c] + Octanoyl-[acyl-carrier protein][c] => 3-Oxodecanoyl-[acyl-carrier protein][c] + acyl carrier protein[c] + CO2[c]	2.3.1.41; 2.3.1.85; 2.3.1.86; 2.3.1.179; 2.3.1.-	AC5u0009GL000227	Fatty acid metabolism
	(3R)-3-Hydroxydecanoyl-[acyl-carrier-protein]:NADP+ oxidoreductase	3-Oxodecanoyl-[acyl-carrier protein][c] + H+[c] + Nicotinamide adenine dinucleotide phosphate - reduced[c] => (3R)-3-Hydroxydecanoyl-[acyl-carrier protein][c] + Nicotinamide adenine dinucleotide phosphate[c]	1.1.1.100	AC5u0009GL000944 or AC5u0009GL000228	Fatty acid metabolism
	(3R)-3-Hydroxybutanoyl-[acyl-carrier-protein] hydro-lyase	(3R)-3-Hydroxydecanoyl-[acyl-carrier protein][c] => trans-Dec-2-enoyl-[acyl-carrier protein][c] + H2O[c]	2.3.1.85 ; 4.2.1.59	AC5u0009GL001030 or AC5u0009GL000225 or AC5u0009GL000233	Fatty acid metabolism
	Decanoyl-[acyl-carrier protein]:malonyl-CoA C-acyltransferase	trans-Dec-2-enoyl-[acyl-carrier protein][c] + H+[c] + Nicotinamide adenine dinucleotide - reduced[c] => Decanoyl-[acyl-carrier protein][c] + Nicotinamide adenine dinucleotide[c]	1.3.1.9 ; 1.3.1.10	AC5u0009GL000221	Fatty acid metabolism
	Decanoyl-[acyl-carrier protein]:malonyl-[acyl-carrier-protein] C-acyltransferase	Decanoyl-[acyl-carrier protein][c] + H+[c] + Malonyl-[acyl-carrier protein][c] => 3-Oxododecanoyl-[acyl-carrier protein][c] + acyl carrier protein[c] + CO2[c]	2.3.1.41; 2.3.1.85; 2.3.1.86; 2.3.1.179; 2.3.1.-	AC5u0009GL000227	Fatty acid metabolism
	3R)-3-Hydroxydodecanoyl-[acyl-carrier-protein]:NADP+ oxidoreductase	3-Oxododecanoyl-[acyl-carrier protein][c] + H+[c] + Nicotinamide adenine dinucleotide phosphate - reduced[c] => (R)-3-Hydroxydodecanoyl-[acyl-carrier protein][c] + Nicotinamide adenine dinucleotide phosphate[c]	1.1.1.100	AC5u0009GL000944 or AC5u0009GL000228	Fatty acid metabolism
	(3R)-3-Hydroxybutanoyl-[acyl-carrier-protein] hydro-lyase	(R)-3-Hydroxydodecanoyl-[acyl-carrier protein][c] => trans-Dodec-2-enoyl-[acyl-carrier protein][c] + H2O[c]	2.3.1.85 ; 4.2.1.59	AC5u0009GL001030 or AC5u0009GL000225 or AC5u0009GL000233	Fatty acid metabolism
	Dodecanoyl-[acyl-carrier protein]: malonyl-CoA C-acyltransferase	trans-Dodec-2-enoyl-[acyl-carrier protein][c] + H+[c] + Nicotinamide adenine dinucleotide - reduced[c] => Dodecanoyl-[acyl-carrier protein][c] + Nicotinamide adenine dinucleotide[c]	1.3.1.9 ; 1.3.1.10	AC5u0009GL000221	Fatty acid metabolism
	Dodecanoyl-[acyl-carrier-protein]:malonyl-[acyl-carrier-protein] C-acyltransferase	Dodecanoyl-[acyl-carrier protein][c] + H+[c] + Malonyl-[acyl-carrier protein][c] => 3-Oxotetradecanoyl-[acyl-carrier protein][c] + acyl carrier protein[c] + CO2[c]	2.3.1.41; 2.3.1.85; 2.3.1.86; 2.3.1.179; 2.3.1.-	AC5u0009GL000227	Fatty acid metabolism
	3R)-3-Hydroxytetradecanoyl-[acyl-carrier-protein]:NADP+ oxidoreductase	3-Oxotetradecanoyl-[acyl-carrier protein][c] + H+[c] + Nicotinamide adenine dinucleotide phosphate - reduced[c] => (3R)-3-Hydroxytetradecanoyl-[acyl-carrier protein][c] + Nicotinamide adenine dinucleotide phosphate[c]	1.1.1.100	AC5u0009GL000944 or AC5u0009GL000228	Fatty acid metabolism
	(3R)-3-Hydroxypalmitoyl-[acyl-carrier-protein] hydro-lyase	(3R)-3-Hydroxytetradecanoyl-[acyl-carrier protein][c] => trans-Tetradec-2-enoyl-[acyl-carrier protein][c] + H2O[c]	2.3.1.85 ; 4.2.1.59	AC5u0009GL001030 or AC5u0009GL000225 or AC5u0009GL000233	Fatty acid metabolism
	Tetradecanoyl-[acyl-carrier protein]:malonyl-CoA C-acyltransferase	trans-Tetradec-2-enoyl-[acyl-carrier protein][c] + H+[c] + Nicotinamide adenine dinucleotide - reduced[c] => Nicotinamide adenine dinucleotide[c] + Tetradecanoyl-[acyl-carrier protein][c]	1.3.1.9 ; 1.3.1.10	AC5u0009GL000221	Fatty acid metabolism
	Tetradecanoyl-[acyl-carrier-protein]:malonyl-[acyl-carrier-protein] C-acyltransferase	H+[c] + Malonyl-[acyl-carrier protein][c] + Tetradecanoyl-[acyl-carrier protein][c] => 3-Oxohexadecanoyl-[acp][c] + acyl carrier protein[c] + CO2[c]	2.3.1.41; 2.3.1.85; 2.3.1.86; 2.3.1.179; 2.3.1.-	AC5u0009GL000227	Fatty acid metabolism
	(3R)-3-Hydroxypalmitoyl-[acyl-carrier-protein]:NADP+ oxidoreductase	3-Oxohexadecanoyl-[acp][c] + H+[c] + Nicotinamide adenine dinucleotide phosphate - reduced[c] => (3R)-3-Hydroxypalmitoyl-[acyl-carrier protein][c] + Nicotinamide adenine dinucleotide phosphate[c]	1.1.1.100	AC5u0009GL000944 or AC5u0009GL000228	Fatty acid metabolism
	(3R)-3-Hydroxypalmitoyl-[acyl-carrier-protein] hydro-lyase	(3R)-3-Hydroxypalmitoyl-[acyl-carrier protein][c] => trans-Hexadec-2-enoyl-[acyl-carrier protein][c] + H2O[c]	2.3.1.85 ; 4.2.1.59	AC5u0009GL001030 or AC5u0009GL000225 or AC5u0009GL000233	Fatty acid metabolism
	Hexadecanoyl-[acyl-carrier protein]:malonyl-CoA C-acyltransferase	trans-Hexadec-2-enoyl-[acyl-carrier protein][c] + H+[c] + Nicotinamide adenine dinucleotide - reduced[c] => Nicotinamide adenine dinucleotide[c] + Palmitoyl-ACP (n-C16:0ACP)[c]	1.3.1.9 ; 1.3.1.10	AC5u0009GL000221	Fatty acid metabolism
	Hexadecanoyl-[acyl-carrier-protein]:malonyl-[acyl-carrier-protein] C-acyltransferase	H+[c] + Malonyl-[acyl-carrier protein][c] + Palmitoyl-ACP (n-C16:0ACP)[c] => 3-Oxooctadecanoyl-[acp][c] + acyl carrier protein[c] + CO2[c]	2.3.1.41; 2.3.1.85; 2.3.1.86; 2.3.1.179; 2.3.1.-	AC5u0009GL000227	Fatty acid metabolism
	(3R)-3-Hydroxyoctadecanoyl-[acyl-carrier-protein]:NADP+ oxidoreductase	3-Oxooctadecanoyl-[acp][c] + H+[c] + Nicotinamide adenine dinucleotide phosphate - reduced[c] => (3R)-3-Hydroxyoctadecanoyl-[acyl-carrier protein[c] + Nicotinamide adenine dinucleotide phosphate[c]	1.1.1.100	AC5u0009GL000944 or AC5u0009GL000228	Fatty acid metabolism
	(3R)-3-Hydroxyoctadecanoyl-[acyl-carrier-protein] hydro-lyase	(3R)-3-Hydroxyoctadecanoyl-[acyl-carrier protein[c] => trans-Octadec-2-enoyl-[acyl-carrier-protein][c] + H2O[c]	2.3.1.85 ; 4.2.1.59	AC5u0009GL001030 or AC5u0009GL000225 or AC5u0009GL000233	Fatty acid metabolism
	Octadecanoyl-[acyl-carrier protein]:malonyl-CoA C-acyltransferase	trans-Octadec-2-enoyl-[acyl-carrier-protein][c] + H+[c] + Nicotinamide adenine dinucleotide - reduced[c] => Nicotinamide adenine dinucleotide[c] + Octadecanoyl-[acyl-carrier protein][c]	1.3.1.9 ; 1.3.1.10	AC5u0009GL000221	Fatty acid metabolism
	cyclopropane fatty acid synthase (n18:0)	S-Adenosyl-L-methionine[c] + Octadecenoyl-ACP (n-C18:1ACP)[c] => S-Adenosyl-L-homocysteine[c] + cyclopropanoyl octadecanoyl-[acyl-carrier protein][c] + H+[c]	2.1.1.79	AC5u0009GL000910	Fatty acid metabolism
	fatty-acyl-ACP hydrolase	H2O[c] + Palmitoyl-ACP (n-C16:0ACP)[c] <=> acyl carrier protein[c] + H+[c] + Hexadecanoate (n-C16:0)[c]	3.1.2.21	AC5u0009GL000768	Fatty acid metabolism
	fatty-acyl-ACP hydrolase	H2O[c] + Octadecanoyl-ACP (n-C18:0ACP)[c] <=> acyl carrier protein[c] + H+[c] + octadecanoate (n-C18:0)[c]	3.1.2.21	AC5u0009GL000768	Fatty acid metabolism
	fatty-acyl-ACP hydrolase	H2O[c] + Myristoyl-ACP (n-C14:0ACP)[c] <=> acyl carrier protein[c] + H+[c] + tetradecanoate[c]	3.1.2.21	AC5u0009GL000768	Fatty acid metabolism
	fatty-acyl-ACP hydrolase	Dodecanoyl-ACP (n-C12:0ACP)[c] + H2O[c] <=> acyl carrier protein[c] + Dodecanoate[c] + H+[c]	3.1.2.21	AC5u0009GL000768	Fatty acid metabolism
	fatty-acyl-ACP hydrolase	H2O[c] + Tetradecenoyl-ACP (n-C14:1ACP)[c] <=> acyl carrier protein[c] + H+[c] + tetradecenoate (n-C14:1)[c]	3.1.2.21	AC5u0009GL000768	Fatty acid metabolism
	fatty-acyl-ACP hydrolase	H2O[c] + Hexadecenoyl-ACP (n-C16:1ACP)[c] <=> acyl carrier protein[c] + H+[c] + hexadecenoate (n-C16:1)[c]	3.1.2.21	AC5u0009GL000768	Fatty acid metabolism
	fatty-acyl-ACP hydrolase	H2O[c] + Octadecenoyl-ACP (n-C18:1ACP)[c] <=> acyl carrier protein[c] + H+[c] + octadecenoate (n-C18:1)[c]	3.1.2.21	AC5u0009GL000768	Fatty acid metabolism
	fatty-acyl-ACP hydrolase	H2O[c] + Octadecynoyl-ACP (n-C18:2ACP)[c] <=> acyl carrier protein[c] + H+[c] + octadecynoate (n-C18:2)[c]	3.1.2.21	AC5u0009GL000768	Fatty acid metabolism
	dihydrofolate reductase	7,8-Dihydrofolate[c] + H+[c] + Nicotinamide adenine dinucleotide phosphate - reduced[c] <=> Nicotinamide adenine dinucleotide phosphate[c] + 5,6,7,8-Tetrahydrofolate[c]	1.5.1.3	AC5u0009GL001566	Folate biosynthesis
	GTP cyclohydrolase I	GTP[c] + H2O[c] => 2-Amino-4-hydroxy-6-(erythro-1,2,3-trihydroxypropyl)dihydropteridine triphosphate[c] + Formate[c] + H+[c]	3.5.4.16	AC5u0009GL001064	Folate biosynthesis
	dihydroneopterin aldolase / 7,8-dihydroneopterin epimerase	2-Amino-4-hydroxy-6-(D-erythro-1,2,3-trihydroxypropyl)-7,8-dihydropteridine[c] => 2-Amino-4-hydroxy-6-hydroxymethyl-7,8-dihydropteridine[c] + Glycolaldehyde[c]	4.1.2.25/ 5.1.99.8	AC5u0009GL001062	Folate biosynthesis
	dihydrofolate synthase	ATP[c] + Dihydropteroate[c] + L-Glutamate[c] => ADP[c] + 7,8-Dihydrofolate[c] + H+[c] + Phosphate[c]	6.3.2.12; 6.3.2.17	AC5u0009GL000849 or AC5u0009GL001065 or AC5u0009GL001066 or AC5u0009GL000674 or AC5u0009GL002122	Folate biosynthesis
	alkaline phosphatase	2-Amino-4-hydroxy-6-(erythro-1,2,3-trihydroxypropyl)dihydropteridine triphosphate[c] + 3 H2O[c] <=> 2-Amino-4-hydroxy-6-(D-erythro-1,2,3-trihydroxypropyl)-7,8-dihydropteridine[c] + 3 Phosphate[c]	3.1.3.1	AC5u0009GL000964 or AC5u0009GL001481 or AC5u0009GL002025	Folate biosynthesis
	6-(hydroxymethyl)-7,8-dihydropterin:4-aminobenzoate 2-amino-4-hydroxydihydropteridine-6-methenyltransferase	2-Amino-4-hydroxy-6-hydroxymethyl-7,8-dihydropteridine[c] + 4-Aminobenzoate[c] <=> Dihydropteroate[c] + H2O[c]	2.5.1.15	AC5u0009GL001068 or AC5u0009GL000847	Folate biosynthesis
	Dihydroneopterin triphosphate pyrophosphatase	2-Amino-4-hydroxy-6-(erythro-1,2,3-trihydroxypropyl)dihydropteridine triphosphate[c] + H2O[c] => Dihydroneopterin monophosphate[c] + H+[c] + Diphosphate[c]	3.6.1.67 / 3.1.6.66 ; 3.6.1.-	AC5u0009GL000848 or AC5u0009GL001067	Folate biosynthesis
	Dihydroneopterin monophosphate dephosphorylase	Dihydroneopterin monophosphate[c] + H2O[c] => 2-Amino-4-hydroxy-6-(D-erythro-1,2,3-trihydroxypropyl)-7,8-dihydropteridine[c] + Phosphate[c]	3.6.1.-	AC5u0009GL000642 or AC5u0009GL000848 or AC5u0009GL002154 or AC5u0009GL001067	Folate biosynthesis
	7,8-dihydroneopterin 2'-epimerase	2-Amino-4-hydroxy-6-(D-erythro-1,2,3-trihydroxypropyl)-7,8-dihydropteridine[c] <=> 7,8-Dihydromonapterin[c]	5.1.99.8	AC5u0009GL001062	Folate biosynthesis
	2-amino-4-hydroxy-6-hydroxymethyldihydropteridine diphosphokinase	2-Amino-4-hydroxy-6-hydroxymethyl-7,8-dihydropteridine[c] + ATP[c] => 2-Amino-4-hydroxy-6-hydroxymethyl-7,8-dihydropteridine diphosphate[c] + AMP[c] + H+[c]	2.7.6.3	AC5u0009GL001063	Folate biosynthesis
	dihydropteroate synthase	2-Amino-4-hydroxy-6-hydroxymethyl-7,8-dihydropteridine diphosphate[c] + 4-Aminobenzoate[c] => Dihydropteroate[c] + Diphosphate[c]	2.5.1.15	AC5u0009GL001068 or AC5u0009GL000847	Folate biosynthesis
	dihydrofolate reductase	7,8-Dihydrofolate[c] + Nicotinamide adenine dinucleotide phosphate[c] <=> Folate[c] + H+[c] + Nicotinamide adenine dinucleotide phosphate - reduced[c]	1.5.1.3	AC5u0009GL001566	Folate biosynthesis
	GTP 3',8-cyclase	GTP[c] + S-Adenosyl-L-methionine[c] + AH2[c] <=> (8S)-3',8-Cyclo-7,8-dihydroguanosine 5'-triphosphate[c] + 5'-Deoxyadenosine[c] + L-Methionine[c] + A[c]	4.1.99.22	AC5u0009GL001952	Folate biosynthesis
	cyclic pyranopterin monophosphate synthase	(8S)-3',8-Cyclo-7,8-dihydroguanosine 5'-triphosphate[c] + H2O[c] <=> cPMP[c] + Diphosphate[c]	4.6.1.17	AC5u0009GL001950	Folate biosynthesis
	molybdopterin synthase catalytic subunit	cPMP[c] + 2 Thiocarboxy-[sulfur-carrier protein][c] <=> Molybdopterin[c] + 2 Sulfur-carrier protein[c]	2.8.1.12	AC5u0009GL000262	Folate biosynthesis
	molybdopterin molybdotransferase	Adenylated molybdopterin[c] + Molybdate[c] <=> Molybdoenzyme molybdenum cofactor[c] + AMP[c] + H2O[c]	2.10.1.1	AC5u0009GL000251	Folate biosynthesis
	molybdopterin-guanine dinucleotide biosynthesis protein A	Molybdoenzyme molybdenum cofactor[c] + GTP[c] <=> Guanylyl molybdenum cofactor[c] + Diphosphate[c]	2.7.7.77	AC5u0009GL000253	Folate biosynthesis
	D-mannitol dehydrogenase	D-Mannitol[c] + Nicotinamide adenine dinucleotide[c] <=> D-Fructose[c] + H+[c] + Nicotinamide adenine dinucleotide - reduced[c]	1.1.1.67	AC5u0009GL001852	Fructose or mannose metabolism
	fructokinase	ATP[c] + D-Fructose[c] => ADP[c] + D-Fructose 6-phosphate[c] + H+[c]	2.7.1.4	AC5u0009GL001746	Fructose or mannose metabolism
	mannitol-1-phosphate 5-dehydrogenase	D-Mannitol 1-phosphate[c] + Nicotinamide adenine dinucleotide[c] <=> D-Fructose 6-phosphate[c] + H+[c] + Nicotinamide adenine dinucleotide - reduced[c]	1.1.1.17	AC5u0009GL002062	Fructose or mannose metabolism
	mannose-6-phosphate isomerase	D-Mannose 6-phosphate[c] <=> D-Fructose 6-phosphate[c]	5.3.1.8	AC5u0009GL002012	Fructose or mannose metabolism
	phosphomannomutase	D-Mannose 1-phosphate[c] <=> D-Mannose 6-phosphate[c]	5.4.2.8	AC5u0009GL000802	Fructose or mannose metabolism
	UTP-glucose-1-phosphate uridylyltransferase	D-Glucose 1-phosphate[c] + H+[c] + UTP[c] <=> Diphosphate[c] + UDPglucose[c]	2.7.7.9;2.7.7.64	AC5u0009GL000794	Galactose metabolism
	UDPglucose--hexose-1-phosphate uridylyltransferase	UDPglucose[c] + alpha-D-Galactose 1-phosphate[c] <=> D-Glucose 1-phosphate[c] + UDPgalactose[c]	2.7.7.12	AC5u0009GL002027	Galactose metabolism
	aldose 1-epimerase	D-Galactose[c] <=> alpha-D galactose[c]	5.1.3.3	AC5u0009GL001430	Galactose metabolism
	galactokinase	alpha-D galactose[c] + ATP[c] => ADP[c] + alpha-D-Galactose 1-phosphate[c] + H+[c]	2.7.1.6	AC5u0009GL002028	Galactose metabolism
	UDPglucose 4-epimerase	UDPglucose[c] <=> UDPgalactose[c]	5.1.3.2	AC5u0009GL000772	Galactose metabolism
	a-galactosidase (melibiose)	H2O[c] + Melibiose[c] => D-Galactose[c] + D-Glucose[c]	3.2.1.22	AC5u0009GL000933 or AC5u0009GL001744	Galactose metabolism
	beta-galactosidase	H2O[c] + Lactose[c] => D-Galactose[c] + D-Glucose[c]	3.2.1.23 ; 3.2.1.108	AC5u0009GL000722 or AC5u0009GL000721	Galactose metabolism
	Raffinose galactohydrolase	H2O[c] + Raffinose[c] => D-Galactose[c] + Sucrose[c]	3.2.1.22	AC5u0009GL000933 or AC5u0009GL001744	Galactose metabolism
	galactose-1-phosphate uridylyltransferase	alpha-D-Galactose 1-phosphate[c] + H+[c] + UTP[c] <=> Diphosphate[c] + UDPgalactose[c]	2.7.7.10; 2.7.7.64	AC5u0009GL002027	Galactose metabolism
	UDPgalactopyranose mutase	UDPgalactose[c] => UDP-D-galacto-1,4-furanose[c]	5.4.99.9	AC5u0009GL001427 or AC5u0009GL001456	Galactose metabolism
	glutamate racemase	D-Glutamate[c] <=> L-Glutamate[c]	5.1.1.3	AC5u0009GL000643 or AC5u0009GL002153	Glutamine or glutamate metabolism
	glutathione-disulfide reductase	2 Reduced glutathione[c] + Nicotinamide adenine dinucleotide phosphate[c] <=> H+[c] + Nicotinamide adenine dinucleotide phosphate - reduced[c] + Oxidized glutathione[c]	1.8.1.7	AC5u0009GL000277	Glutathione metabolism
	glutathione synthase	ATP[c] + gamma-L-Glutamyl-L-cysteine[c] + Glycine[c] => ADP[c] + Reduced glutathione[c] + H+[c] + Phosphate[c]	6.3.2.3	AC5u0009GL000401	Glutathione metabolism
	alcohol dehydrogenase (D-glyceraldehyde to glycerol, NADP)	D-Glyceraldehyde[c] + H+[c] + Nicotinamide adenine dinucleotide phosphate - reduced[c] <=> Glycerol[c] + Nicotinamide adenine dinucleotide phosphate[c]	1.1.1.72	AC5u0009GL000399	Glycerolipid metabolism
	Diacylglycerol kinase (LRE specific)	ATP[c] + 1,2-Diacylglycerol, LRE specific[c] => ADP[c] + H+[c] + phosphatidic acid (Lb reuteri specific)[c]	2.7.1.107	AC5u0009GL001598 or AC5u0009GL000332	Glycerolipid metabolism
	1-Acyl-glycerol-3-phosphate acyltransferase (Lb reuteri specific)	1-Acyl-sn-glycerol 3-phosphate (Lb reuteri specific)[c] + 0.0211 cyclopropanoyl octadecanoyl-[acyl-carrier protein][c] + 0.0258 Hexadecenoyl-ACP (n-C16:1ACP)[c] + 0.075 Octadecanoyl-[acyl-carrier protein][c] + 0.3519 Octadecynoyl-ACP (n-C18:2ACP)[c] + 0.1591 Octadecenoyl-ACP (n-C18:1ACP)[c] + 0.2566 Palmitoyl-ACP (n-C16:0ACP)[c] + 0.0687 Tetradecanoyl-[acyl-carrier protein][c] + 0.0418 octadecatr…	2.3.1.51	AC5u0009GL000205	Glycerolipid metabolism
	1,2-diacylglycerol 3-glucosyltransferase (LRE specific)	1,2-Diacylglycerol, LRE specific[c] + 2 UDPglucose[c] => Diglucosyl-diacylglycerol[c] + 2 H+[c] + 2 UDP[c]	2.4.1.- ; 2.4.1.337	AC5u0009GL001145 or AC5u0009GL001144	Glycerolipid metabolism
	glycerol kinase	ATP[c] + Glycerol[c] => ADP[c] + sn-Glycerol 3-phosphate[c] + H+[c]	2.7.1.30	AC5u0009GL001478	Glycerolipid metabolism
	aldehyde dehydrogenase (D-glyceraldehyde, NAD)	D-Glyceraldehyde[c] + H2O[c] + Nicotinamide adenine dinucleotide[c] => (R)-Glycerate[c] + 2 H+[c] + Nicotinamide adenine dinucleotide - reduced[c]	1.2.1.3	AC5u0009GL000754	Glycerolipid metabolism
	Glycerol dehydrogenase	Glycerol[c] + Nicotinamide adenine dinucleotide[c] => Dihydroxyacetone[c] + H+[c] + Nicotinamide adenine dinucleotide - reduced[c]	1.1.1.6	AC5u0009GL001480	Glycerolipid metabolism
	glycerate 2-kinase	(D)-Glycerate[c] + ATP[c] <=> D-Glycerate 2-phosphate[c] + ADP[c]	2.7.1.165	AC5u0009GL001365	Glycerolipid metabolism
	glycerol dehydratase	Glycerol[c] <=> 3-Hydroxypropanal[c] + H2O[c]	4.2.1.30	AC5u0009GL001923 or AC5u0009GL001922 or AC5u0009GL001926 or AC5u0009GL001924 or AC5u0009GL001925	Glycerolipid metabolism
	glycerol-3-phosphate acyltransferase PlsX	sn-Glycerol 3-phosphate[c] + Acyl-CoA[c] <=> 1-Acyl-sn-glycerol 3-phosphate[c] + Coenzyme A[c]	2.3.1.15	AC5u0009GL000013 or AC5u0009GL001555	Glycerolipid metabolism
	glycerate kinase	ATP[c] + (R)-Glycerate[c] => 3-Phospho-D-glycerate[c] + ADP[c] + H+[c]	2.7.1.31	AC5u0009GL001365	Glycerolipid metabolism
	Phosphatidylglycerol:membrane-derived-oligosaccharide-D-glucose glycerophosphotransferase	Phosphatidylglycerol[c] + Diglucosyl-diacylglycerol[c] <=> 1,2-Diacylglycerol[c] + Glycerophosphoglycoglycerolipid[c]	2.7.8.20	AC5u0009GL001481	Glycerolipid metabolism
	phosphatidic acid phosphatase	H2O[c] + phosphatidic acid (Lb reuteri specific)[c] => 1,2-Diacylglycerol, LRE specific[c] + Phosphate[c]	3.1.3.4 ; 3.1.3.81	AC5u0009GL001224 or AC5u0009GL000931	Glycerolipid metabolism
	1,3-propanediol dehydrogenase	Propane-1,3-diol[c] + Nicotinamide adenine dinucleotide[c] <=> 3-Hydroxypropanal[c] + H+[c] + Nicotinamide adenine dinucleotide - reduced[c]	1.1.1.202	AC5u0009GL001517	Glycerolipid metabolism
	alcohol dehydrogenase (L-glyceraldehyde to glycerol, NADP)	L-Glyceraldehyde[c] + H+[c] + Nicotinamide adenine dinucleotide phosphate - reduced[c] <=> Glycerol[c] + Nicotinamide adenine dinucleotide phosphate[c]	1.1.1.372	AC5u0009GL000399	Glycerolipid metabolism
	alcohol dehydrogenase (glycerol)	D-Glyceraldehyde[c] + H+[c] + Nicotinamide adenine dinucleotide - reduced[c] <=> Glycerol[c] + Nicotinamide adenine dinucleotide[c]	1.1.1.21; 1.1.1.72 ; 1.1.1.2	AC5u0009GL000790	Glycerolipid metabolism
	Phosphatidylglycerol phosphate phosphatase (LRE specific)	H2O[c] + Phosphatidylglycerophosphate (LRE specific)[c] => Phospatidylglycerol (LRE specific)[c] + Phosphate[c]	3.1.3.27	AC5u0009GL000931	Glycerophospholipid metabolism
	CDP-Diacylglycerol synthetase (LRE specific)	CTP[c] + H+[c] + phosphatidic acid (Lb reuteri specific)[c] <=> CDPdiacylglycerol (LRE specific)[c] + Diphosphate[c]	2.7.7.41	AC5u0009GL000196	Glycerophospholipid metabolism
	Phosphatidylglycerol synthase (LRE specific)	CDPdiacylglycerol (LRE specific)[c] + sn-Glycerol 3-phosphate[c] <=> CMP[c] + H+[c] + Phosphatidylglycerophosphate (LRE specific)[c]	2.7.8.5	AC5u0009GL000663 or AC5u0009GL002133	Glycerophospholipid metabolism
	Glycerophosphodiester phosphodiesterase (Glycerophosphoglycerol)	Glycerophosphoglycerol[c] + H2O[c] => sn-Glycerol 3-phosphate[c] + Glycerol[c] + H+[c]	3.1.4.46	AC5u0009GL000398	Glycerophospholipid metabolism
	Glycerophosphodiester phosphodiesterase (Glycerophosphoserine)	Glycerophosphoserine[c] + H2O[c] => sn-Glycerol 3-phosphate[c] + H+[c] + L-Serine[c]	3.1.4.46	AC5u0009GL000398	Glycerophospholipid metabolism
	Glycerophosphodiester phosphodiesterase (Glycerophosphoethanolamine)	sn-Glycero-3-phosphoethanolamine[c] + H2O[c] => Ethanolamine[c] + sn-Glycerol 3-phosphate[c] + H+[c]	3.1.4.2; 3.1.4.46	AC5u0009GL000398	Glycerophospholipid metabolism
	Glycerophosphodiester phosphodiesterase (sn-Glycero-3-phosphocholine)	sn-Glycero-3-phosphocholine[c] + H2O[c] => Choline[c] + sn-Glycerol 3-phosphate[c] + H+[c]	3.1.4.2; 3.1.4.46	AC5u0009GL000398	Glycerophospholipid metabolism
	glycerol-3-phosphate cytidylyltransferase	CTP[c] + sn-Glycerol 3-phosphate[c] + H+[c] => CDPglycerol[c] + Diphosphate[c]	2.7.7.39	AC5u0009GL000196	Glycerophospholipid metabolism
	glycerol-3-phosphate dehydrogenase (NAD)	sn-Glycerol 3-phosphate[c] + Nicotinamide adenine dinucleotide[c] <=> Dihydroxyacetone phosphate[c] + H+[c] + Nicotinamide adenine dinucleotide - reduced[c]	1.1.1.94	AC5u0009GL000793	Glycerophospholipid metabolism
	Cardiolipin Synthase (LRE specific)	2 Phospatidylglycerol (LRE specific)[c] <=> Cardiolipin (LRE specific)[c] + Glycerol[c]	2.7.8.-	AC5u0009GL000414 or AC5u0009GL000415 or AC5u0009GL002046	Glycerophospholipid metabolism
	aspartate kinase	L-Aspartate[c] + ATP[c] <=> 4-Phospho-L-aspartate[c] + ADP[c]	2.7.2.4	AC5u0009GL001355	Glycine, serine or threonine metabolism
	glycine hydroxymethyltransferase	L-Serine[c] + 5,6,7,8-Tetrahydrofolate[c] <=> Glycine[c] + H2O[c] + 5,10-Methylenetetrahydrofolate[c]	2.1.2.1	AC5u0009GL000116	Glycine, serine or threonine metabolism
	homoserine dehydrogenase (NADPH)	L-Homoserine[c] + Nicotinamide adenine dinucleotide phosphate[c] <=> L-Aspartate 4-semialdehyde[c] + H+[c] + Nicotinamide adenine dinucleotide phosphate - reduced[c]	1.1.1.3	AC5u0009GL000902	Glycine, serine or threonine metabolism
	Aminopropanol dehydrogenase reversible	H+[c] + Nicotinamide adenine dinucleotide - reduced[c] + Aminoacetone[c] <=> 1-Aminopropan-2-ol[c] + Nicotinamide adenine dinucleotide[c]	1.1.1.75 or 2.3.1.37	AC5u0009GL001480	Glycine, serine or threonine metabolism
	L-serine deaminase	L-Serine[c] => Ammonium[c] + Pyruvate[c]	4.3.1.17; 4.3.1.19; 4.3.1.15	AC5u0009GL001472 or AC5u0009GL001471	Glycine, serine or threonine metabolism
	Cystathionine beta synthase	L-Homocysteine[c] + L-Serine[c] => L-Cystathionine[c] + H2O[c]	4.2.1.22	AC5u0009GL001444 or AC5u0009GL002043	Glycine, serine or threonine metabolism
	O-phospho-L-homoserine phosphate-lyase (adding water;L-threonine-forming)	O-Phospho-L-homoserine[c] + H2O[c] => L-Threonine[c] + Phosphate[c]	4.2.3.1	AC5u0009GL000903	Glycine, serine or threonine metabolism
	ATP:L-homoserine O-phosphotransferase	ATP[c] + L-Homoserine[c] <=> ADP[c] + O-Phospho-L-homoserine[c]	2.7.1.39	AC5u0009GL000901	Glycine, serine or threonine metabolism
	aspartate-semialdehyde dehydrogenase	L-Aspartate 4-semialdehyde[c] + Nicotinamide adenine dinucleotide phosphate[c] + Phosphate[c] <=> 4-Phospho-L-aspartate[c] + H+[c] + Nicotinamide adenine dinucleotide phosphate - reduced[c]	1.2.1.11	AC5u0009GL001362	Glycine, serine or threonine metabolism
	glyceraldehyde-3-phosphate dehydrogenase (NAD)	Glyceraldehyde 3-phosphate[c] + Nicotinamide adenine dinucleotide[c] + Phosphate[c] <=> 3-Phospho-D-glyceroyl phosphate[c] + H+[c] + Nicotinamide adenine dinucleotide - reduced[c]	1.2.1.12; 1.2.1.59	AC5u0009GL001869	Glycolysis / Gluconeogenesis
	phosphoglycerate kinase	3-Phospho-D-glyceroyl phosphate[c] + ADP[c] <=> 3-Phospho-D-glycerate[c] + ATP[c]	2.7.2.3	AC5u0009GL001870	Glycolysis / Gluconeogenesis
	phosphoglycerate mutase	3-Phospho-D-glycerate[c] <=> D-Glycerate 2-phosphate[c]	5.4.2.11; 5.4.2.12	AC5u0009GL000361 or AC5u0009GL000959 or AC5u0009GL001483 or AC5u0009GL001350 or AC5u0009GL000724 or AC5u0009GL000888 or AC5u0009GL001908	Glycolysis / Gluconeogenesis
	enolase	D-Glycerate 2-phosphate[c] <=> H2O[c] + Phosphoenolpyruvate[c]	4.2.1.11	AC5u0009GL001872	Glycolysis / Gluconeogenesis
	pyruvate kinase	ADP[c] + H+[c] + Phosphoenolpyruvate[c] => ATP[c] + Pyruvate[c]	2.7.1.40	AC5u0009GL001585 or AC5u0009GL000357	Glycolysis / Gluconeogenesis
	glucokinase	ATP[c] + D-Glucose[c] => ADP[c] + D-Glucose 6-phosphate[c] + H+[c]	2.7.1.2	AC5u0009GL000061	Glycolysis / Gluconeogenesis
	glucose-6-phosphate isomerase	D-Glucose 6-phosphate[c] <=> D-Fructose 6-phosphate[c]	5.3.1.9	AC5u0009GL000149	Glycolysis / Gluconeogenesis
	Phosphofructokinase, PfkB	ATP[c] + D-Fructose 6-phosphate[c] <=> ADP[c] + D-Fructose 1,6-bisphosphate[c] + H+[c]	2.7.1.11	AC5u0009GL000982 or AC5u0009GL001057	Glycolysis / Gluconeogenesis
	fructose-bisphosphate aldolase	D-Fructose 1,6-bisphosphate[c] <=> Dihydroxyacetone phosphate[c] + Glyceraldehyde 3-phosphate[c]	4.1.2.13	AC5u0009GL000360	Glycolysis / Gluconeogenesis
	triose-phosphate isomerase	Dihydroxyacetone phosphate[c] <=> Glyceraldehyde 3-phosphate[c]	5.3.1.1	AC5u0009GL000359 or AC5u0009GL000936 or AC5u0009GL001871	Glycolysis / Gluconeogenesis
	Glucose-6-phosphate isomerase	D-Glucose 6-phosphate[c] <=> beta-D-glucose 6-phosphate[c]	5.1.3.15; 5.3.1.9	AC5u0009GL000149	Glycolysis / Gluconeogenesis
	alkaline phosphatase	Dihydroxyacetone phosphate[c] + H2O[c] => Dihydroxyacetone[c] + Phosphate[c]	3.1.3.1 ; 3.1.3.2	AC5u0009GL000964 or AC5u0009GL001481 or AC5u0009GL002025	Glycolysis / Gluconeogenesis
	phosphoenolpyruvate carboxykinase	ATP[c] + Oxaloacetate[c] => ADP[c] + CO2[c] + Phosphoenolpyruvate[c]	4.1.1.49	AC5u0009GL001030	Glycolysis / Gluconeogenesis
	pyruvate dehydrogenase	Coenzyme A[c] + Nicotinamide adenine dinucleotide[c] + Pyruvate[c] => Acetyl-CoA[c] + CO2[c] + Nicotinamide adenine dinucleotide - reduced[c]	1.2.1.-; 1.2.1.51; 1.2.4.1; 1.8.1.4; 2.3.1.12	AC5u0009GL001377 or AC5u0009GL001374 or AC5u0009GL001375 or AC5u0009GL001376	Glycolysis / Gluconeogenesis
	phosphoglucomutase	D-Glucose 1-phosphate[c] <=> D-Glucose 6-phosphate[c]	5.4.2.2; 5.4.2.5	AC5u0009GL000802	Glycolysis / Gluconeogenesis
	phosphoglycolate phosphatase	2-Phosphoglycolate[c] + H2O[c] => Glycolate[c] + Phosphate[c]	3.1.3.18	AC5u0009GL002089	Glyoxylate or dicarboxylate metabolism
	oxalyl-CoA decarboxylase	Oxalyl-CoA[c] <=> Formyl-CoA[c] + CO2[c]	4.1.1.8	AC5u0009GL000698 or AC5u0009GL000699	Glyoxylate or dicarboxylate metabolism
	histidinol-phosphatase (PHP family)	L-Histidinol phosphate[c] + H2O[c] <=> L-Histidinol[c] + Phosphate[c]	3.1.3.15	AC5u0009GL000423	Histidine metabolism
	myo-inositol 1-phosphatase	H2O[c] + 1D-myo-Inositol 1-phosphate[c] => myo-Inositol[c] + Phosphate[c]	3.1.3.25	AC5u0009GL001052 or AC5u0009GL001955 or AC5u0009GL001379	Inositol phosphate metabolism
	Glycerophosphodiester phosphodiesterase (Glycerophosphoinositol)	sn-Glycero-3-phospho-1-inositol[c] + H2O[c] => sn-Glycerol 3-phosphate[c] + H+[c] + myo-Inositol[c]	3.1.4.44	AC5u0009GL000398	Inositol phosphate metabolism
	diaminopimelate epimerase	LL-2,6-Diaminoheptanedioate[c] <=> meso-2,6-Diaminoheptanedioate[c]	5.1.1.7	AC5u0009GL001354	Lysine biosynthesis
	apolipoprotein N-acyl transferase	Acetyl-CoA[c] + H2O[c] + 2,3,4,5-Tetrahydrodipicolinate[c] <=> N-Acetyl-L-2-amino-6-oxopimelate[c] + Coenzyme A[c]	2.3.1.89	AC5u0009GL001357	Lysine biosynthesis
	acetyl-diaminopimelate deacetylase	N6-Acetyl-LL-2,6-diaminoheptanedioate[c] + H2O[c] + H+[c] => LL-2,6-Diaminoheptanedioate[c] + Acetate[c]	3.5.1.47	AC5u0009GL001358	Lysine biosynthesis
	dihydrodipicolinate reductase (NADPH)	2,3-Dihydrodipicolinate[c] + H+[c] + Nicotinamide adenine dinucleotide phosphate - reduced[c] => Nicotinamide adenine dinucleotide phosphate[c] + 2,3,4,5-Tetrahydrodipicolinate[c]	1.3.1.26 ; 1.17.1.8	AC5u0009GL001360	Lysine biosynthesis
	dihydrodipicolinate synthase	L-Aspartate 4-semialdehyde[c] + Pyruvate[c] => 2,3-Dihydrodipicolinate[c] + 2 H2O[c] + H+[c]	4.3.3.7	AC5u0009GL001359	Lysine biosynthesis
	lysine decarboxylase	H+[c] + L-Lysine[c] => 1,5-Diaminopentane[c] + CO2[c]	4.1.1.18	AC5u0009GL001169	Lysine biosynthesis
	diaminopimelate decarboxylase	meso-2,6-Diaminoheptanedioate[c] + H+[c] => CO2[c] + L-Lysine[c]	4.1.1.20	AC5u0009GL001356	Lysine biosynthesis
	tetrahydropicolinate succinylase	H2O[c] + Succinyl-CoA[c] + 2,3,4,5-Tetrahydrodipicolinate[c] => Coenzyme A[c] + N-Succinyl-2-L-amino-6-oxoheptanedioate[c]	2.3.1.117	AC5u0009GL001357	Lysine biosynthesis
	succinyl-diaminopimelate desuccinylase	H2O[c] + N-Succinyl-LL-2,6-diaminoheptanedioate[c] => LL-2,6-Diaminoheptanedioate[c] + Succinate[c]	3.5.1.18	AC5u0009GL000615 or AC5u0009GL001436 or AC5u0009GL001051 or AC5u0009GL000799	Lysine biosynthesis
	acetyldiaminopimelate transaminase	2-Oxoglutarate[c] + N6-Acetyl-LL-2,6-diaminoheptanedioate[c] + H+[c] <=> N-Acetyl-L-2-amino-6-oxopimelate[c] + L-Glutamate[c]	2.6.1.-	AC5u0009GL000055 or AC5u0009GL000419 or AC5u0009GL001361 or AC5u0009GL001591	Lysine biosynthesis
	thioredoxin reductase (NADPH)	H+[c] + Nicotinamide adenine dinucleotide phosphate - reduced[c] + Oxidized thioredoxin[c] => Nicotinamide adenine dinucleotide phosphate[c] + Reduced thioredoxin[c]	1.8.1.9	AC5u0009GL000798 or AC5u0009GL001474 or AC5u0009GL000835 or AC5u0009GL001080	Nicotinate or nicotinamide metabolism
	ATP:nicotinamide-nucleotide adenylyltransferase	ATP[c] + Nicotinamide D-ribonucleotide[c] <=> Diphosphate[c] + Nicotinamide adenine dinucleotide[c]	2.7.7.1 ; 2.7.7.18	AC5u0009GL000090	Nicotinate or nicotinamide metabolism
	NAD kinase	ATP[c] + Nicotinamide adenine dinucleotide[c] => ADP[c] + H+[c] + Nicotinamide adenine dinucleotide phosphate[c]	2.7.1.23	AC5u0009GL001810	Nicotinate or nicotinamide metabolism
	nicotinamide ribonucleotide phosphohydrolase	Nicotinamide D-ribonucleotide[c] + H2O[c] <=> Nicotinamide-beta-riboside[c] + Phosphate[c]	3.1.3.5	AC5u0009GL001278	Nicotinate or nicotinamide metabolism
	nicotinamidase, reversible	H2O[c] + Nicotinamide[c] => Nicotinate[c] + Ammonium[c]	3.5.1.19	AC5u0009GL000346	Nicotinate or nicotinamide metabolism
	NAPRTase	H+[c] + Nicotinate[c] + 5-Phospho-alpha-D-ribose 1-diphosphate[c] => Nicotinate D-ribonucleotide[c] + Diphosphate[c]	6.3.4.21	AC5u0009GL000345 or AC5u0009GL000718	Nicotinate or nicotinamide metabolism
	nicotinate-nucleotide adenylyltransferase	ATP[c] + H+[c] + Nicotinate D-ribonucleotide[c] <=> Deamino-NAD+[c] + Diphosphate[c]	2.7.7.1 ; 2.7.7.18	AC5u0009GL000090	Nicotinate or nicotinamide metabolism
	NAD synthase (nh4)	ATP[c] + Deamino-NAD+[c] + Ammonium[c] => AMP[c] + H+[c] + Nicotinamide adenine dinucleotide[c] + Diphosphate[c]	6.3.1.5 ; 6.3.5.1	AC5u0009GL000719	Nicotinate or nicotinamide metabolism
	Pyrazinamidase	H2O[c] + Maleamate[c] => Maleate[c] + Ammonium[c]	3.5.1.107	AC5u0009GL000346	Nicotinate or Nicotinamide metabolism
	nicotinamide-D-ribonucleotide amidohydrolase	Nicotinamide D-ribonucleotide[c] + H2O[c] <=> Nicotinate D-ribonucleotide[c] + Ammonium[c]	3.5.1.42	AC5u0009GL000662 or AC5u0009GL002134	Nicotinate or nicotinamide metabolism
	Nicotinate D-ribonucleoside:orthophosphate ribosyltransferase	Nicotinate D-ribonucleoside[c] + Phosphate[c] <=> Nicotinate[c] + alpha-D-Ribose 1-phosphate[c] + H+[c]	2.4.2.1	AC5u0009GL001505	Nicotinate or nicotinamide metabolism
	nicotinate D-ribonucleotide phosphohydrolase	Nicotinate D-ribonucleotide[c] + H2O[c] <=> Nicotinate D-ribonucleoside[c] + Phosphate[c]	3.1.3.5	AC5u0009GL001278	Nicotinate or nicotinamide metabolism
	Carbamate kinase	ADP[c] + Carbamoyl phosphate[c] => ATP[c] + Carbamate[c]	2.7.2.2	AC5u0009GL000143	Nitrogen metabolism
	Tetrahydrofolate:L-glutamate gamma-ligase (ADP-forming)	ATP[c] + L-Glutamate[c] + 5,6,7,8-Tetrahydrofolate[c] <=> ADP[c] + H+[c] + Phosphate[c] + Tetrahydrofolyl-[Glu](2)[c]	6.3.2.17	AC5u0009GL000849 or AC5u0009GL001065 or AC5u0009GL001066 or AC5u0009GL000674 or AC5u0009GL002122	One carbon pool by folate
	formate-tetrahydrofolate ligase	ATP[c] + Formate[c] + 5,6,7,8-Tetrahydrofolate[c] => 10-Formyltetrahydrofolate[c] + ADP[c] + Phosphate[c]	6.3.4.3	AC5u0009GL000908	One carbon pool by folate
	Methionyl-tRNA formyltransferase	10-Formyltetrahydrofolate[c] + L-Methionyl-tRNA (Met)[c] => N-Formylmethionyl-tRNA[c] + H+[c] + 5,6,7,8-Tetrahydrofolate[c]	2.1.2.9	AC5u0009GL000024	One carbon pool by folate
	methenyltetrahydrofolate cyclohydrolase	H2O[c] + 5,10-Methenyltetrahydrofolate[c] <=> 10-Formyltetrahydrofolate[c] + H+[c]	3.5.4.9	AC5u0009GL000036	One carbon pool by folate
	5-formyltetrahydrofolate cyclo-ligase	5-Formyltetrahydrofolate[c] + ATP[c] => ADP[c] + 5,10-Methenyltetrahydrofolate[c] + Phosphate[c]	6.3.3.2	AC5u0009GL000018 or AC5u0009GL000065	One carbon pool by folate
	methylenetetrahydrofolate dehydrogenase (NADP)	5,10-Methylenetetrahydrofolate[c] + Nicotinamide adenine dinucleotide phosphate[c] <=> 5,10-Methenyltetrahydrofolate[c] + Nicotinamide adenine dinucleotide phosphate - reduced[c]	1.5.1.5	AC5u0009GL000036	One carbon pool by folate
	NADH dehydrogenase (Menaquinone 7 & no proton)	H+[c] + Menaquinone 7[c] + Nicotinamide adenine dinucleotide - reduced[c] => Menaquinol 7[c] + Nicotinamide adenine dinucleotide[c]		AC5u0009GL000675	Oxidative phosphorylation
	pantetheine-phosphate adenylyltransferase	ATP[c] + H+[c] + Pantetheine 4'-phosphate[c] <=> Dephospho-CoA[c] + Diphosphate[c]	2.7.7.3	AC5u0009GL001384	Pantothenate or CoA biosynthesis
	pantothenate kinase	ATP[c] + (R)-Pantothenate[c] => D-4'-Phosphopantothenate[c] + ADP[c] + H+[c]	2.7.1.33	AC5u0009GL000965	Pantothenate or CoA biosynthesis
	phosphopantothenate-cysteine ligase	D-4'-Phosphopantothenate[c] + CTP[c] + L-Cysteine[c] => N-((R)-4-Phosphopantothenoyl)-L-cysteine[c] + CDP[c] + H+[c] + Phosphate[c]	6.3.2.5	AC5u0009GL000026	Pantothenate or CoA biosynthesis
	phosphopantothenoylcysteine decarboxylase	N-((R)-4-Phosphopantothenoyl)-L-cysteine[c] + H+[c] => CO2[c] + Pantetheine 4'-phosphate[c]	4.1.1.36	AC5u0009GL000026	Pantothenate or CoA biosynthesis
	dephospho-CoA kinase	ATP[c] + Dephospho-CoA[c] => ADP[c] + Coenzyme A[c] + H+[c]	2.7.1.24	AC5u0009GL000820 or AC5u0009GL001095	Pantothenate or CoA biosynthesis
	2-dehydropantoate 2-reductase	2-Dehydropantoate[c] + H+[c] + Nicotinamide adenine dinucleotide phosphate - reduced[c] => Nicotinamide adenine dinucleotide phosphate[c] + (R)-Pantoate[c]	1.1.1.169	AC5u0009GL000435 or AC5u0009GL000781	Pantothenate or CoA biosynthesis
	pantothenate kinase	ATP[c] + N-((R)-Pantothenoyl)-L-cysteine[c] <=> ADP[c] + (R)-4'-Phosphopantothenoyl-L-cysteine[c]	2.7.1.33	AC5u0009GL000965	Pantothenate or CoA biosynthesis
	pantothenate kinase	ATP[c] + Pantetheine[c] <=> ADP[c] + Pantetheine 4'-phosphate[c]	2.7.1.33 ; 2.7.1.34	AC5u0009GL000965	Pantothenate or CoA biosynthesis
	acyl-carrier protein synthase	apoprotein [acyl carrier protein][c] + Coenzyme A[c] => acyl carrier protein[c] + H+[c] + Adenosine 3',5'-bisphosphate[c]	2.7.8.7	AC5u0009GL000373	Pantothenate or CoA biosynthesis
	2,5-diketo-D-gluconate reductase (NADH)	2,5-diketo-D-gluconate[c] + H+[c] + Nicotinamide adenine dinucleotide - reduced[c] => 5-Dehydro-D-gluconate[c] + Nicotinamide adenine dinucleotide[c]	1.1.1.215	AC5u0009GL000399 or AC5u0009GL000463 or AC5u0009GL002037	Pentose or glucuronate interconversions
	2,5-diketo-D-gluconate reductase (NADPH)	2,5-diketo-D-gluconate[c] + H+[c] + Nicotinamide adenine dinucleotide phosphate - reduced[c] => 5-Dehydro-D-gluconate[c] + Nicotinamide adenine dinucleotide phosphate[c]	1.1.1.-; 1.1.1.215	AC5u0009GL000399 or AC5u0009GL000463 or AC5u0009GL002037 or AC5u0009GL000462	Pentose or glucuronate interconversions
	2,5-diketo-D-gluconate reductase	2,5-diketo-D-gluconate[c] + H+[c] + Nicotinamide adenine dinucleotide phosphate - reduced[c] => 2-Dehydro-L-gulonate[c] + Nicotinamide adenine dinucleotide phosphate[c]	1.1.1.346	AC5u0009GL000399 or AC5u0009GL000463 or AC5u0009GL002037	Pentose or glucuronate interconversions
	6-phosphogluconolactonase	6-phospho-D-glucono-1,5-lactone[c] + H2O[c] => 6-Phospho-D-gluconate[c] + H+[c]	3.1.1.31	AC5u0009GL001322	Pentose phosphate pathway
	phosphogluconate dehydrogenase	6-Phospho-D-gluconate[c] + Nicotinamide adenine dinucleotide phosphate[c] => CO2[c] + Nicotinamide adenine dinucleotide phosphate - reduced[c] + D-Ribulose 5-phosphate[c]	1.1.1.351 ; 1.1.1.44 ; 1.1.1.343	AC5u0009GL002017	Pentose phosphate pathway
	glucose 6-phosphate dehydrogenase	D-Glucose 6-phosphate[c] + Nicotinamide adenine dinucleotide phosphate[c] <=> 6-phospho-D-glucono-1,5-lactone[c] + H+[c] + Nicotinamide adenine dinucleotide phosphate - reduced[c]	1.1.1.363; 1.1.1.49	AC5u0009GL002016	Pentose phosphate pathway
	ribulose 5-phosphate 3-epimerase	D-Ribulose 5-phosphate[c] <=> D-Xylulose 5-phosphate[c]	5.1.3.1	AC5u0009GL000019	Pentose phosphate pathway
	phosphoketolase	Phosphate[c] + D-Xylulose 5-phosphate[c] <=> Acetyl phosphate[c] + Glyceraldehyde 3-phosphate[c] + H2O[c]	4.1.2.9	AC5u0009GL001624	Pentose phosphate pathway
	deoxyribose-phosphate aldolase	2-Deoxy-D-ribose 5-phosphate[c] => Acetaldehyde[c] + Glyceraldehyde 3-phosphate[c]	4.1.2.4	AC5u0009GL000557 or AC5u0009GL001508	Pentose phosphate pathway
	phosphopentomutase (deoxyribose)	2-Deoxy-D-ribose 1-phosphate[c] <=> 2-Deoxy-D-ribose 5-phosphate[c]	5.4.2.7	AC5u0009GL001507 or AC5u0009GL000923	Pentose phosphate pathway
	ribokinase	ATP[c] + D-Ribose[c] => ADP[c] + H+[c] + alpha-D-Ribose 5-phosphate[c]	2.7.1.15	AC5u0009GL000982 or AC5u0009GL001057	Pentose phosphate pathway
	gluconokinase	ATP[c] + D-Gluconate[c] => 6-Phospho-D-gluconate[c] + ADP[c] + H+[c]	2.7.1.12	AC5u0009GL001543 or AC5u0009GL001789 or AC5u0009GL001859	Pentose phosphate pathway
	Deoxyribokinase	ATP[c] + Deoxyribose[c] => 2-Deoxy-D-ribose 5-phosphate[c] + ADP[c] + H+[c]	2.7.1.15	AC5u0009GL000982 or AC5u0009GL001057	Pentose phosphate pathway
	arabinose reductase	L-Arabinose[c] + H+[c] + Nicotinamide adenine dinucleotide phosphate - reduced[c] <=> L-Arabinitol[c] + Nicotinamide adenine dinucleotide phosphate[c]	1.1.1.21	AC5u0009GL000399	Pentose phosphate pathway
	ribose-5-phosphate isomerase	alpha-D-Ribose 5-phosphate[c] <=> D-Ribulose 5-phosphate[c]	5.3.1.6	AC5u0009GL000731	Pentose phosphate pathway
	phosphopentomutase	alpha-D-Ribose 1-phosphate[c] <=> alpha-D-Ribose 5-phosphate[c]	5.4.2.-; 5.4.2.2; 5.4.2.7	AC5u0009GL001507 or AC5u0009GL000923	Pentose phosphate pathway
	UDP-N-acetylglucosamine 1-carboxyvinyltransferase	Phosphoenolpyruvate[c] + UDP-N-acetyl-D-glucosamine[c] => Phosphate[c] + UDP-N-acetyl-3-O-(1-carboxyvinyl)-D-glucosamine[c]	2.5.1.7	AC5u0009GL000102 or AC5u0009GL000352	Peptidoglycan biosynthesis
	UDP-N-acetylenolpyruvoylglucosamine reductase	H+[c] + Nicotinamide adenine dinucleotide phosphate - reduced[c] + UDP-N-acetyl-3-O-(1-carboxyvinyl)-D-glucosamine[c] => Nicotinamide adenine dinucleotide phosphate[c] + UDP-N-acetylmuramate[c]	1.3.1.98	AC5u0009GL000981	Peptidoglycan biosynthesis
	UDP-N-acetylmuramoyl-L-alanine synthetase	L-Alanine[c] + ATP[c] + UDP-N-acetylmuramate[c] => ADP[c] + H+[c] + Phosphate[c] + UDP-N-acetylmuramoyl-L-alanine[c]	6.3.2.8	AC5u0009GL000826 or AC5u0009GL001089	Peptidoglycan biosynthesis
	UDP-N-acetylmuramoyl-L-alanyl-D-glutamate synthetase	ATP[c] + D-Glutamate[c] + UDP-N-acetylmuramoyl-L-alanine[c] => ADP[c] + H+[c] + Phosphate[c] + UDP-N-acetylmuramoyl-L-alanyl-D-glutamate[c]	6.3.2.9	AC5u0009GL001333	Peptidoglycan biosynthesis
	UDP-N-acetylmuramoyl-L-alanyl-D-glutamyl-meso-2,6-diaminopimelate synthetase	meso-2,6-Diaminoheptanedioate[c] + ATP[c] + UDP-N-acetylmuramoyl-L-alanyl-D-glutamate[c] => ADP[c] + H+[c] + Phosphate[c] + UDP-N-acetylmuramoyl-L-alanyl-D-gamma-glutamyl-meso-2,6-diaminopimelate[c]	6.3.2.13	AC5u0009GL000121 or AC5u0009GL000574	Peptidoglycan biosynthesis
	UDP-N-acetylmuramoyl-L-alanyl-D-glutamyl-meso-2,6-diaminopimeloyl-D-alanyl-D-lactate synthetase	D-Alanyl-D-lactate[c] + ATP[c] + UDP-N-acetylmuramoyl-L-alanyl-D-gamma-glutamyl-meso-2,6-diaminopimelate[c] => ADP[c] + H+[c] + Phosphate[c] + UDP-N-acetylmuramoyl-L-alanyl-D-glutamyl-meso-2,6-diaminopimeloyl-D-alanyl-D-lactate[c]	6.3.2.10	AC5u0009GL000365	peptidoglycan biosynthesis
	phospho-N-acetylmuramoyl-pentapeptide-transferase (meso-2,6-diaminopimelate)	Undecaprenyl phosphate[c] + UDP-N-acetylmuramoyl-L-alanyl-D-glutamyl-meso-2,6-diaminopimeloyl-D-alanyl-D-lactate[c] => Undecaprenyl-diphospho-N-acetylmuramoyl-L-alanyl-D-glutamyl-meso-2,6-diaminopimeloyl-D-alanyl-D-lactate[c] + UMP[c]	2.7.8.13	AC5u0009GL001332	peptidoglycan biosynthesis
	undecaprenyl-diphosphatase	H2O[c] + Undecaprenyl diphosphate[c] => H+[c] + Phosphate[c] + Undecaprenyl phosphate[c]	3.6.1.27	AC5u0009GL000275 or AC5u0009GL001962	Peptidoglycan biosynthesis
	peptidoglycan glycosyltransferase	Undecaprenyl-diphospho-N-acetylmuramoyl-(N-acetylglucosamine)-L-alanyl-D-glutamyl-meso-2,6-diaminopimeloyl-D-alanyl-D-lactate[c] => peptidoglycan with D-lac as C-terminal residue to form pentadepsipeptide[c] + Undecaprenyl diphosphate[c]	2.4.1.129	AC5u0009GL000841 or AC5u0009GL001074 or AC5u0009GL001732 or AC5u0009GL001331	Peptidoglycan biosynthesis
	UDP-N-acetylglucosamine-N-acetylmuramyl-(pentapeptide)pyrophosphoryl-undecaprenol N-acetylglucosamine transferase	UDP-N-acetyl-D-glucosamine[c] + Undecaprenyl-diphospho-N-acetylmuramoyl-L-alanyl-D-glutamyl-meso-2,6-diaminopimeloyl-D-alanyl-D-lactate[c] => H+[c] + Undecaprenyl-diphospho-N-acetylmuramoyl-(N-acetylglucosamine)-L-alanyl-D-glutamyl-meso-2,6-diaminopimeloyl-D-alanyl-D-lactate[c] + UDP[c]	2.4.1.227	AC5u0009GL001334	peptidoglycan biosynthesis
	D-Alanine lipoteichoic acid ligase	lipoteichoic acid (n=25, LRE specific)[c] + 20 D-Alanine[c] + 20 ATP[c] => Lipoteichoic acid (n=25) with 100% D-Ala substitutions (LRE specific)[c] + 20 ADP[c] + 20 Phosphate[c]	6.1.1.13	AC5u0009GL000370 or AC5u0009GL000371 or AC5u0009GL000368 or AC5u0009GL000369	peptidoglycan biosynthesis
	Glucose lipoteichoic acid ligase	lipoteichoic acid (n=25, LRE specific)[c] + 20 UDPglucose[c] => Lipoteichoic acid (n=25 with glucose residues, LRE specific)[c] + 20 H+[c] + 20 UDP[c]	2.4.1.52	AC5u0009GL001177 or AC5u0009GL001178	peptidoglycan biosynthesis
	undecaprenol kinase	ATP[c] + Undecaprenol[c] => ADP[c] + H+[c] + Undecaprenyl phosphate[c]	2.7.1.66	AC5u0009GL001598	Peptidoglycan biosynthesis
	UDP-N-acetylmuramoyl-L-alanyl-D-glutamyl-L-lysyl-D-alanyl-D-alanine synthetase (gamma-glutamate)	D-Alanyl-D-alanine[c] + ATP[c] + UDP-N-acetylmuramoyl-L-alanyl-gamma-D-glutamyl-L-lysine[c] => ADP[c] + H+[c] + Phosphate[c] + UDP-N-acetylmuramoyl-L-alanyl-gamma-D-glutamyl-L-lysyl-D-alanyl-D-alanine[c]	6.3.2.10	AC5u0009GL000365	peptidoglycan biosynthesis
	UDP-N-acetylmuramoyl-L-alanyl-D-glutamyl-L-lysyl-D-alanyl-D-alanine synthetase (alpha-glutamate)	D-Alanyl-D-alanine[c] + ATP[c] + UDP-N-acetylmuramoyl-L-alanyl-D-glutamyl-L-lysine[c] => ADP[c] + Phosphate[c] + UDP-N-acetylmuramoyl-L-alanyl-D-glutamyl-L-lysyl-D-alanyl-D-alanine[c]	6.3.2.10 or 6.3.2.4	AC5u0009GL000365	peptidoglycan biosynthesis
	N-acetylmuramoyl-L-alanine amidase	N-Acetyl-D-muramoyl-L-alanine[c] + H2O[c] => N-Acetyl-D-muramoate[c] + L-Alanine[c]	3.5.1.28 ; 3.2.1.96	AC5u0009GL001126 or AC5u0009GL002096 or AC5u0009GL001418	peptidoglycan biosynthesis
	aspartate transaminase	2-Oxoglutarate[c] + L-Phenylalanine[c] <=> L-Glutamate[c] + Phenylpyruvate[c]	2.6.1.1	AC5u0009GL000780	Phenylalanine metabolism
	aryl-alcohol dehydrogenase	H+[c] + Nicotinamide adenine dinucleotide - reduced[c] + Phenylacetaldehyde[c] <=> Nicotinamide adenine dinucleotide[c] + Phenylethyl alcohol[c]	1.1.1.90; 1.1.1.1	AC5u0009GL001122 or AC5u0009GL002010	Phenylalanine metabolism
	aromatic amino acid aminotransferase - tyrosine	(S)-3-Methyl-2-oxopentanoate[c] + L-Tyrosine[c] <=> 3-(4-Hydroxyphenyl)pyruvate[c] + L-Isoleucine[c]		AC5u0009GL000055 or AC5u0009GL000419 or AC5u0009GL001361 or AC5u0009GL001591	Phenylalanine, tyrosine or tryptophan biosynthesis
	quinate dehydrogenase (pyrroloquinoline-quinone)	PQQ (Pyrroloquinoline-quinone) oxidized form[c] + Quinate[c] => 3-Dehydroquinate[c] + H+[c] + PQQ (pyrroloquinoline-quinone) reduced form[c]	1.1.1.24	AC5u0009GL000942	Phenylalanine, tyrosine or tryptophan biosynthesis
	aromatic amino acid aminotransferase - tyrosine	Indolepyruvate[c] + L-Tyrosine[c] <=> 3-(4-Hydroxyphenyl)pyruvate[c] + L-Tryptophan[c]		AC5u0009GL000055 or AC5u0009GL000419 or AC5u0009GL001361 or AC5u0009GL001591	Phenylalanine, tyrosine or tryptophan biosynthesis
	aromatic amino acid aminotransferase - phenylalanine	(S)-3-Methyl-2-oxopentanoate[c] + L-Phenylalanine[c] <=> L-Isoleucine[c] + Phenylpyruvate[c]		AC5u0009GL000055 or AC5u0009GL000419 or AC5u0009GL001361 or AC5u0009GL001591	Phenylalanine, tyrosine or tryptophan biosynthesis
	glucose-1-phosphate thymidylyltransferase	dTTP[c] + D-Glucose 1-phosphate[c] + H+[c] => dTDPglucose[c] + Diphosphate[c]	2.7.7.24	AC5u0009GL001424 or AC5u0009GL001417	Polyketide sugar unit biosynthesis
	dTDPglucose 4,6-dehydratase	dTDPglucose[c] => dTDP-4-dehydro-6-deoxy-D-glucose[c] + H2O[c]	4.2.1.46	AC5u0009GL001415	Polyketide sugar unit biosynthesis
	dTDP-4-dehydrorhamnose 3,5-epimerase	dTDP-4-dehydro-6-deoxy-D-glucose[c] => dTDP-4-dehydro-6-deoxy-L-mannose[c]	5.1.3.13	AC5u0009GL001416	Polyketide sugar unit biosynthesis
	dTDP-4-dehydrorhamnose reductase	dTDP-6-deoxy-L-mannose[c] + Nicotinamide adenine dinucleotide phosphate[c] <=> dTDP-4-dehydro-6-deoxy-L-mannose[c] + H+[c] + Nicotinamide adenine dinucleotide phosphate - reduced[c]	1.1.1.133	AC5u0009GL001414	Polyketide sugar unit biosynthesis
	5-aminolevulinate synthase;	Succinyl-CoA[c] + Glycine[c] <=> 5-Amino-4-oxopentanoate[c] + Coenzyme A[c] + CO2[c]	2.3.1.37	AC5u0009GL001480	Porphyrin or Chlorophyll metabolism
	porphobilinogen synthase	2 5-Amino-4-oxopentanoate[c] => 2 H2O[c] + H+[c] + Porphobilinogen[c]	4.2.1.24	AC5u0009GL001880	Porphyrin or Chlorophyll metabolism
	hydroxymethylbilane synthase	H2O[c] + 4 Porphobilinogen[c] => Hydroxymethylbilane[c] + 4 Ammonium[c]	2.5.1.61	AC5u0009GL001881	Porphyrin or Chlorophyll metabolism
	uroporphyrinogen-III synthase	Hydroxymethylbilane[c] => H2O[c] + Uroporphyrinogen III[c]	4.2.1.75	AC5u0009GL001875 or AC5u0009GL001891	Porphyrin or Chlorophyll metabolism
	precorrin-2 dehydrogenase / sirohydrochlorin ferrochelatase	2 S-Adenosyl-L-methionine[c] + Uroporphyrinogen III[c] => 2 S-Adenosyl-L-homocysteine[c] + Precorrin 2[c]	2.1.1.107	AC5u0009GL001883	Porphyrin or Chlorophyll metabolism
	sirohydrochlorin dehydrogenase (NAD)	Precorrin 2[c] + Nicotinamide adenine dinucleotide[c] => Sirohydrochlorin[c] + Nicotinamide adenine dinucleotide - reduced[c] + H+[c]	1.3.1.76	AC5u0009GL001883	Porphyrin or Chlorophyll metabolism
	sirohydrochlorin cobaltochelatase	Co2+[c] + Sirohydrochlorin[c] => cobalt-precorrin2[c] + 3 H+[c]	4.99.1.3	AC5u0009GL001890	Porphyrin or Chlorophyll metabolism
	Precorrin-3B C17-methyltransferase	S-Adenosyl-L-methionine[c] + Cobalt-precorrin 3[c] => S-Adenosyl-L-homocysteine[c] + Cobalt-precorrin 4[c]	2.1.1.131	AC5u0009GL001893	Porphyrin or Chlorophyll metabolism
	Precorrin-4 C11-methyltransferase	S-Adenosyl-L-methionine[c] + Cobalt-precorrin 4[c] => S-Adenosyl-L-homocysteine[c] + Cobalt-precorrin 5[c] + H+[c]	2.1.1.271	AC5u0009GL001895	Porphyrin or Chlorophyll metabolism
	Precorrin-6A synthase (deacetylating)	S-Adenosyl-L-methionine[c] + Cobalt-precorrin 5[c] + H2O[c] => Acetaldehyde[c] + S-Adenosyl-L-homocysteine[c] + Cobalt-precorrin 6[c] + H+[c]	2.1.1.152	AC5u0009GL001894 or AC5u0009GL001898	Porphyrin or chlorophyll metabolism
	Precorrin-6X reductase	Cobalt-precorrin 6[c] + H+[c] + Nicotinamide adenine dinucleotide phosphate - reduced[c] => Precorrin 6B[c] + Nicotinamide adenine dinucleotide phosphate[c]	1.3.1.54	AC5u0009GL001892	Porphyrin or Chlorophyll metabolism
	Precorrin-6Y C5,15-methyltransferase [decarboxylating]	2 S-Adenosyl-L-methionine[c] + Precorrin 6B[c] => 2 S-Adenosyl-L-homocysteine[c] + CO2[c] + Precorrin 8X[c] + H+[c]	2.1.1.132	AC5u0009GL001897 or AC5u0009GL001896	Porphyrin or chlorophyll metabolism
	Precorrin-8X methylmutase	Precorrin 8X[c] <=> Hydrogenobyrinate[c]	5.4.99.61	AC5u0009GL001899	Porphyrin or chlorophyll metabolism
	Cobyrinic acid a,c-diamide synthase	Hydrogenobyrinate[c] + 2 L-Glutamine[c] + 2 ATP[c] + 2 H2O[c] => Hydrogenobyrinate a,c diamide[c] + 2 Phosphate[c] + 2 L-Glutamate[c] + 2 ADP[c]	6.3.5.9	AC5u0009GL001901	Porphyrin or Chlorophyll metabolism
	ATP:cob(I)yrinic acid-a,c-diamide Cobeta-adenosyltransferase	ATP[c] + Cob(I)yrinate a,c diamide[c] + H2O[c] => Adenosyl cobyrinate diamide[c] + Phosphate[c] + Diphosphate[c]	2.5.1.17	AC5u0009GL001915 or AC5u0009GL001903	Porphyrin or Chlorophyll metabolism
	adenosylcobyric acid synthase	Adenosyl cobyrinate diamide[c] + 4 ATP[c] + 4 L-Glutamine[c] + 4 H2O[c] => adenosyl-cobyric acid[c] + 4 ADP[c] + 4 L-Glutamate[c] + 4 H+[c] + 4 Phosphate[c]	6.3.5.10	AC5u0009GL001884	Porphyrin or chlorophyll metabolism
	Adenosyl cobinamide kinase	Adenosyl cobinamide[c] + ATP[c] => Adenosyl cobinamide phosphate[c] + ADP[c] + H+[c]	2.7.1.156	AC5u0009GL001878	Porphyrin or Chlorophyll metabolism
	adenosylcobinamide kinase / adenosylcobinamide-phosphate guanylyltransferase	Adenosyl cobinamide phosphate[c] + GTP[c] + H+[c] => Adenosine-GDP-cobinamide[c] + Diphosphate[c]	2.7.7.62	AC5u0009GL001878	Porphyrin or Chlorophyll metabolism
	Adenine Adenosylcobalamin 5-phosphate synthase	Adenosine-GDP-cobinamide[c] + adenine ribotide phosphate (7-(5-phospho-Î±-D-ribosyl)adenine)[c] => GMP[c] + H+[c] + Co-alpha-[alpha-(adenin-9-yl)]-Co-beta-adenosylcobamide 5-phosphate[c]	2.7.8.26	AC5u0009GL001877	Porphyrin or chlorophyll metabolism
	Adenine Adenosylcobalamide phosphate phosphatase	H2O[c] + Co-alpha-[alpha-(adenin-9-yl)]-Co-beta-adenosylcobamide 5-phosphate[c] => Phosphate[c] + Pseudo Coenzyme B12 (Co-alpha-[alpha-(adenin-7-yl)]-Co-beta-adenosylcobamide)[c]	3.1.3.73	AC5u0009GL001876	Porphyrin or Chlorophyll metabolism
	nicotinate-nucleotide-dimethylbenzimidazole phosphoribosyltransferase	Adenine[c] + Nicotinate D-ribonucleotide[c] => H+[c] + Nicotinate[c] + adenine ribotide phosphate (7-(5-phospho-Î±-D-ribosyl)adenine)[c]	2.4.2.21	AC5u0009GL001874	Porphyrin or Chlorophyll metabolism
	S-adenosyl-L-methionine:cobalt-factor-II C20-methyltransferase	cobalt-precorrin2[c] + S-Adenosyl-L-methionine[c] <=> Cobalt-factor III[c] + S-Adenosyl-L-homocysteine[c]	2.1.1.151	AC5u0009GL001889	Porphyrin or Chlorophyll metabolism
	Adenosylcobinamide-phosphate synthase	1-Aminopropan-2-ol[c] + adenosyl-cobyric acid[c] + ATP[c] <=> Adenosyl cobinamide[c] + ADP[c] + H+[c] + Phosphate[c]	6.3.1.10	AC5u0009GL001900	Porphyrin or chlorophyll metabolism
	Cob(II)yrinate a,c diamide <=> Cob(I)yrinate a,c diamide	2 Cob(II)yrinate a,c diamide[c] + Nicotinamide adenine dinucleotide - reduced[c] => 2 Cob(I)yrinate a,c diamide[c] + H+[c] + Nicotinamide adenine dinucleotide[c]	1.16.8.-	AC5u0009GL001904	Porphyrin or chlorophyll metabolism
	glutamyl-tRNA reductase	L-Glutamyl-tRNA(Glu)[c] + H+[c] + Nicotinamide adenine dinucleotide phosphate - reduced[c] => L-Glutamate 1-semialdehyde[c] + Nicotinamide adenine dinucleotide phosphate[c] + tRNA (Glu)[c]	1.2.1.70	AC5u0009GL001882	Porphyrin or Chlorophyll metabolism
	glutamate-1-semialdehyde aminotransferase	L-Glutamate 1-semialdehyde[c] <=> 5-Amino-4-oxopentanoate[c]	5.4.3.8	AC5u0009GL001879	Porphyrin or Chlorophyll metabolism
	Precorrin-2 C20-methyltransferase	S-Adenosyl-L-methionine[c] + Precorrin 2[c] <=> S-Adenosyl-L-homocysteine[c] + Precorrin 3A[c] + H+[c]	2.1.1.130	AC5u0009GL001889	Porphyrin or Chlorophyll metabolism
	precorrin-2 dehydrogenase / sirohydrochlorin ferrochelatase	Fe2+[c] + Sirohydrochlorin[c] => Siroheme[c] + 2 H+[c]	4.99.1.4	AC5u0009GL001883	Porphyrin or Chlorophyll metabolism
	Cobalt-precorrin-4 methyltransferase	Cobalt-precorrin 4[c] + S-Adenosyl-L-methionine[c] => Cobalt-precorrin 5A[c] + S-Adenosyl-L-homocysteine[c]	2.1.1.271	AC5u0009GL001893	Porphyrin or Chlorophyll metabolism
	cobalt-precorrin 5A hydrolase	Cobalt-precorrin 5A[c] + H2O[c] => Cobalt-precorrin 5B[c] + Acetaldehyde[c]	3.7.1.12	AC5u0009GL001894	Porphyrin or Chlorophyll metabolism
	cobalt-precorrin-5B (C1)-methyltransferase	Cobalt-precorrin 5B[c] + S-Adenosyl-L-methionine[c] => Cobalt-precorrin 6A[c] + S-Adenosyl-L-homocysteine[c]	2.1.1.195	AC5u0009GL001898	Porphyrin or Chlorophyll metabolism
	Precorrin-6X reductase	Cobalt-precorrin 6A[c] + Nicotinamide adenine dinucleotide - reduced[c] + H+[c] => Cobalt-dihydro-precorrin 6[c] + Nicotinamide adenine dinucleotide[c]	1.3.1.106	AC5u0009GL001892	Porphyrin or Chlorophyll metabolism
	cobalt-precorrin-6B (C15)-methyltransferase / cobalt-precorrin-7 (C5)-methyltransferase	Cobalt-dihydro-precorrin 6[c] + S-Adenosyl-L-methionine[c] => Cobalt-precorrin 7[c] + S-Adenosyl-L-homocysteine[c]	2.1.1.196	AC5u0009GL001897 or AC5u0009GL001896	Porphyrin or chlorophyll metabolism
	cobalt-precorrin-6B (C15)-methyltransferase / cobalt-precorrin-7 (C5)-methyltransferase	Cobalt-precorrin 7[c] + S-Adenosyl-L-methionine[c] => Cobalt-precorrin 8[c] + S-Adenosyl-L-homocysteine[c]	2.1.1.289	AC5u0009GL001897 or AC5u0009GL001896	Porphyrin or chlorophyll metabolism
	Cobyrinic acid a,c-diamide synthase	2 ATP[c] + Cobyrinate[c] + 2 L-Glutamine[c] + 2 H2O[c] => 2 ADP[c] + Cob(II)yrinate a,c diamide[c] + 2 L-Glutamate[c] + 2 H+[c] + 2 Phosphate[c]	6.3.5.11	AC5u0009GL001901	Porphyrin or Chlorophyll metabolism
	S-adenosyl-L-methionine:precorrin-3B C17-methyltransferase	S-Adenosyl-L-methionine[c] + Precorrin 3B[c] => S-Adenosyl-L-homocysteine[c] + Precorrin 4[c]	2.1.1.131	AC5u0009GL001893	Porphyrin or Chlorophyll metabolism
	S-adenosyl-L-methionine:precorrin-4 C11 methyltransferase	S-Adenosyl-L-methionine[c] + Precorrin 4[c] => S-Adenosyl-L-homocysteine[c] + Cobalt-precorrin 5[c]	2.1.1.133	AC5u0009GL001895	Porphyrin or Chlorophyll metabolism
	cobinamide Cobeta-adenosyltransferase	ATP[c] + Cobinamide[c] + H2O[c] <=> Adenosyl cobinamide[c] + Phosphate[c] + Diphosphate[c]	2.5.1.17	AC5u0009GL001915 or AC5u0009GL001903	Porphyrin or Chlorophyll metabolism
	Adenosylcobinamide-phosphate synthase	D-1-Aminopropan-2-ol O-phosphate[c] + adenosyl-cobyric acid[c] + ATP[c] => Adenosyl cobinamide phosphate[c] + ADP[c] + H+[c] + Phosphate[c]	6.3.1.10	AC5u0009GL001900	Porphyrin or Chlorophyll metabolism
	Threonine-phosphate decarboxylase	H+[c] + L-Threonine phosphate[c] => D-1-Aminopropan-2-ol O-phosphate[c] + CO2[c]	4.1.1.81	AC5u0009GL001902	Porphyrin or Chlorophyll metabolism
	ATP:cob(I)alamin Co-beta-adenosyltransferase	ATP[c] + Cob(I)alamin[c] + H+[c] <=> Cobamide coenzyme[c] + Inorganic triphosphate[c]	2.5.1.17	AC5u0009GL001915 or AC5u0009GL001903	Porphyrin or Chlorophyll metabolism
	protoheme ferro-lyase (protoporphyrin-forming)	Fe2+[c] + Protoporphyrin[c] => 2 H+[c] + Protoheme[c]	4.99.1.1	AC5u0009GL001301	Porphyrin or Chlorophyll metabolism
	Ornithine transaminase	2-Oxoglutarate[c] + L-Ornithine[c] <=> L-Glutamate 5-semialdehyde[c] + L-Glutamate[c]	2.6.1.13	AC5u0009GL000606	Proline metabolism
	pyrroline-5-carboxylate reductase	1-Pyrroline-5-carboxylate[c] + 2 H+[c] + Nicotinamide adenine dinucleotide phosphate - reduced[c] <=> Nicotinamide adenine dinucleotide phosphate[c] + L-Proline[c]	1.5.1.2	AC5u0009GL000776 or AC5u0009GL001520	Proline metabolism
	glutamate 5-kinase	ATP[c] + L-Glutamate[c] => ADP[c] + L-Glutamate 5-phosphate[c]	2.7.2.11	AC5u0009GL000778	Proline metabolism
	glutamate-5-semialdehyde dehydrogenase	L-Glutamate 5-phosphate[c] + H+[c] + Nicotinamide adenine dinucleotide phosphate - reduced[c] => L-Glutamate 5-semialdehyde[c] + Nicotinamide adenine dinucleotide phosphate[c] + Phosphate[c]	1.2.1.41	AC5u0009GL000777	Proline metabolism
	aldose reductase (methylglyoxal)	H+[c] + Nicotinamide adenine dinucleotide phosphate - reduced[c] + Methylglyoxal[c] => Nicotinamide adenine dinucleotide phosphate[c] + Acetol cytosol[c]	1.1.1.-	AC5u0009GL001480	Propanoate metabolism
	aldose reductase (acetol)	H+[c] + Nicotinamide adenine dinucleotide - reduced[c] + Acetol cytosol[c] => Nicotinamide adenine dinucleotide[c] + (R)-Propane-1,2-diol[c]	1.1.1.6	AC5u0009GL001480	Propanoate metabolism
	propanediol dehydratase	(R)-Propane-1,2-diol[c] => H2O[c] + Propanal[c]	4.2.1.28	AC5u0009GL001923 or AC5u0009GL001924 or AC5u0009GL001925	Propanoate metabolism
	propionate kinase	ADP[c] + Propanoyl phosphate[c] <=> ATP[c] + Propionate (n-C3:0)[c]	2.7.2.15	AC5u0009GL000624 or AC5u0009GL001911 or AC5u0009GL002172	propanoate metabolism
	propionaldehyde dehydrogenase	3-Hydroxypropanal[c] + Coenzyme A[c] + Nicotinamide adenine dinucleotide[c] => H+[c] + Nicotinamide adenine dinucleotide - reduced[c] + 3-Hydroxypropionyl-CoA[c]	no ec	AC5u0009GL000754 or AC5u0009GL001913	propanoate metabolism
	Propionate kinase	Phosphate[c] + 3-Hydroxypropionyl-CoA[c] => Coenzyme A[c] + 3-Hydroxypropionyl phosphate[c]	no ec	AC5u0009GL001918	propanoate metabolism
	Propionate kinase	ADP[c] + 3-Hydroxypropionyl phosphate[c] => ATP[c] + 3-Hydroxypropanoate[c]	no ec	AC5u0009GL000624 or AC5u0009GL001911 or AC5u0009GL002172	propanoate metabolism
	propanal dehydrogenase (CoA-propanoylating)	Coenzyme A[c] + Nicotinamide adenine dinucleotide[c] + Propanal[c] <=> H+[c] + Nicotinamide adenine dinucleotide - reduced[c] + Propanoyl-CoA[c]	1.2.1.87	AC5u0009GL001913	Propanoate metabolism
	phosphate propanoyltransferase	Phosphate[c] + Propanoyl-CoA[c] <=> Coenzyme A[c] + Propanoyl phosphate[c]	2.3.1.222 or 2.3.1.8	AC5u0009GL001918	Propanoate metabolism
	alcohol dehydrogenase (propanol)	Nicotinamide adenine dinucleotide[c] + 1-Propanol[c] <=> H+[c] + Nicotinamide adenine dinucleotide - reduced[c] + Propanal[c]	1.1.1.202 ; 1.2.1.98	AC5u0009GL001517 or AC5u0009GL001912	Propanoate metabolism
	2-methylpropanol dehydrogenase	2-methylpropanal[c] + H+[c] + Nicotinamide adenine dinucleotide - reduced[c] <=> 2-methylpropanol[c] + Nicotinamide adenine dinucleotide[c]	1.2.1.98	AC5u0009GL001912	Propanoate metabolism
	adenylate kinase	AMP[c] + ATP[c] <=> 2 ADP[c]	2.7.4.3	AC5u0009GL000309	Purine metabolism
	GMP reductase	GMP[c] + 2 H+[c] + Nicotinamide adenine dinucleotide phosphate - reduced[c] => IMP[c] + Nicotinamide adenine dinucleotide phosphate[c] + Ammonium[c]	1.7.1.7	AC5u0009GL000395	Purine metabolism
	nucleoside-diphosphate kinase (ATP:GDP)	ATP[c] + GDP[c] <=> ADP[c] + GTP[c]	2.7.4.6	AC5u0009GL000603	Purine metabolism
	ribonucleoside-triphosphate reductase (ATP)	ATP[c] + Reduced thioredoxin[c] => dATP[c] + H2O[c] + Oxidized thioredoxin[c]	1.17.4.2	AC5u0009GL001026 or AC5u0009GL001728 or AC5u0009GL001940	Purine metabolism
	purine-nucleoside phosphorylase (Deoxyadenosine)	Deoxyadenosine[c] + Phosphate[c] <=> 2-Deoxy-D-ribose 1-phosphate[c] + Adenine[c]	2.4.2.1	AC5u0009GL001505	Purine metabolism
	5'-nucleotidase (dAMP)	dAMP[c] + H2O[c] => Deoxyadenosine[c] + Phosphate[c]	3.1.3.5 ; 3.1.3.89	AC5u0009GL001278	Purine metabolism
	adenylosuccinate synthetase	L-Aspartate[c] + GTP[c] + IMP[c] => N6-(1,2-Dicarboxyethyl)-AMP[c] + GDP[c] + 2 H+[c] + Phosphate[c]	6.3.4.4	AC5u0009GL000394	purine metabolism
	adenylosuccinate lyase	N6-(1,2-Dicarboxyethyl)-AMP[c] <=> AMP[c] + Fumarate[c]	4.3.2.2	AC5u0009GL000898	Purine metabolism
	5'-nucleotidase (IMP)	H2O[c] + IMP[c] => Inosine[c] + Phosphate[c]	3.1.3.5 ; 3.1.3.99	AC5u0009GL001278	Purine metabolism
	ribonucleoside-triphosphate reductase (GTP)	GTP[c] + Reduced thioredoxin[c] => dGTP[c] + H2O[c] + Oxidized thioredoxin[c]	1.17.4.2	AC5u0009GL001026 or AC5u0009GL001728 or AC5u0009GL001940	Purine metabolism
	ADP ribose diphosphatase	ADPribose[c] + H2O[c] => AMP[c] + 2 H+[c] + alpha-D-Ribose 5-phosphate[c]	3.6.1.13	AC5u0009GL001344	Purine metabolism
	phosphoribosylpyrophosphate synthetase	ATP[c] + alpha-D-Ribose 5-phosphate[c] <=> AMP[c] + H+[c] + 5-Phospho-alpha-D-ribose 1-diphosphate[c]	2.7.6.1	AC5u0009GL000583 or AC5u0009GL001353	Purine metabolism
	glutamine phosphoribosyldiphosphate amidotransferase	L-Glutamine[c] + H2O[c] + 5-Phospho-alpha-D-ribose 1-diphosphate[c] => L-Glutamate[c] + Diphosphate[c] + 5-Phospho-beta-D-ribosylamine[c]	2.4.2.14	AC5u0009GL000893	Purine metabolism
	phosphoribosylglycinamide synthetase	ATP[c] + Glycine[c] + 5-Phospho-beta-D-ribosylamine[c] <=> ADP[c] + N1-(5-Phospho-D-ribosyl)glycinamide[c] + H+[c] + Phosphate[c]	6.3.4.13	AC5u0009GL000889	Purine metabolism
	phosphoribosylglycinamide formyltransferase	10-Formyltetrahydrofolate[c] + N1-(5-Phospho-D-ribosyl)glycinamide[c] <=> N2-Formyl-N1-(5-phospho-D-ribosyl)glycinamide[c] + H+[c] + 5,6,7,8-Tetrahydrofolate[c]	2.1.2.2	AC5u0009GL000891	Purine metabolism
	phosphoribosylformylglycinamidine synthase	ATP[c] + N2-Formyl-N1-(5-phospho-D-ribosyl)glycinamide[c] + L-Glutamine[c] + H2O[c] => ADP[c] + 2-(Formamido)-N1-(5-phospho-D-ribosyl)acetamidine[c] + L-Glutamate[c] + H+[c] + Phosphate[c]	6.3.5.3	AC5u0009GL000894 or AC5u0009GL000895	Purine metabolism
	phosphoribosylaminoimidazole synthetase	ATP[c] + 2-(Formamido)-N1-(5-phospho-D-ribosyl)acetamidine[c] => ADP[c] + 5-amino-1-(5-phospho-D-ribosyl)imidazole[c] + 2 H+[c] + Phosphate[c]	6.3.3.1	AC5u0009GL000892	purine metabolism
	phosphoribosylaminoimidazole carboxylase	5-amino-1-(5-phospho-D-ribosyl)imidazole[c] + CO2[c] => 5-amino-1-(5-phospho-D-ribosyl)imidazole-4-carboxylate[c] + H+[c]	4.1.1.21 / 6.3.4.18 / 5.4.99.18	AC5u0009GL000900 or AC5u0009GL000325 or AC5u0009GL000899	Purine metabolism
	5-amino-1-(5-phospho-D-ribosyl)imidazole:carbon-dioxide ligase (ADP-forming)	ATP[c] + 5-amino-1-(5-phospho-D-ribosyl)imidazole[c] + Bicarbonate[c] => ADP[c] + Phosphate[c] + 5-Carboxyamino-1-(5-phospho-D-ribosyl)imidazole[c]	6.3.4.18	AC5u0009GL000900 or AC5u0009GL000325 or AC5u0009GL000899	Purine metabolism
	5-carboxyamino-1-(5-phospho-D-ribosyl)imidazole carboxymutase	5-Carboxyamino-1-(5-phospho-D-ribosyl)imidazole[c] <=> 5-amino-1-(5-phospho-D-ribosyl)imidazole-4-carboxylate[c]	5.4.99.18	AC5u0009GL000900 or AC5u0009GL000325 or AC5u0009GL000899	Purine metabolism
	phosphoribosylaminoimidazolesuccinocarboxamide synthase	5-amino-1-(5-phospho-D-ribosyl)imidazole-4-carboxylate[c] + L-Aspartate[c] + ATP[c] <=> (S)-2-[5-Amino-1-(5-phospho-D-ribosyl)imidazole-4-carboxamido]succinate[c] + ADP[c] + H+[c] + Phosphate[c]	6.3.2.6	AC5u0009GL000897	Purine metabolism
	adenylosuccinate lyase	(S)-2-[5-Amino-1-(5-phospho-D-ribosyl)imidazole-4-carboxamido]succinate[c] <=> 5-Amino-1-(5-Phospho-D-ribosyl)imidazole-4-carboxamide[c] + Fumarate[c]	4.3.2.2	AC5u0009GL000898	Purine metabolism
	phosphoribosylaminoimidazolecarboxamide formyltransferase	10-Formyltetrahydrofolate[c] + 5-Amino-1-(5-Phospho-D-ribosyl)imidazole-4-carboxamide[c] <=> 5-Formamido-1-(5-phospho-D-ribosyl)imidazole-4-carboxamide[c] + 5,6,7,8-Tetrahydrofolate[c]	2.1.2.3	AC5u0009GL000890	Purine metabolism
	IMP cyclohydrolase	H2O[c] + IMP[c] <=> 5-Formamido-1-(5-phospho-D-ribosyl)imidazole-4-carboxamide[c]	3.5.4.10 / 2.1.2.3	AC5u0009GL000890	Purine metabolism
	nucleoside-diphophate kinase (ATP:IDP)	ATP[c] + IDP[c] <=> ADP[c] + ITP[c]	2.7.4.6	AC5u0009GL000603	Purine metabolism
	hypoxanthine phosphoribosyltransferase (Hypoxanthine)	Hypoxanthine[c] + 5-Phospho-alpha-D-ribose 1-diphosphate[c] => IMP[c] + Diphosphate[c]	2.4.2.8	AC5u0009GL000386 or AC5u0009GL001821	Purine metabolism
	purine nucleosidase (inosine)	H2O[c] + Inosine[c] => Hypoxanthine[c] + D-Ribose[c]	3.2.2.1	AC5u0009GL002084	Purine metabolism
	Adenosine deaminase	Adenosine[c] + H2O[c] + H+[c] => Inosine[c] + Ammonium[c]	3.5.4.4	AC5u0009GL000758	Purine metabolism
	purine nucleosidase (adenosine)	Adenosine[c] + H2O[c] => Adenine[c] + D-Ribose[c]	3.2.2.1	AC5u0009GL002084	Purine metabolism
	5'-nucleotidase (AMP)	AMP[c] + H2O[c] => Adenosine[c] + Phosphate[c]	3.1.3.5	AC5u0009GL001278	Purine metabolism
	adenine phosphoribosyltransferase	Adenine[c] + 5-Phospho-alpha-D-ribose 1-diphosphate[c] => AMP[c] + Diphosphate[c]	2.4.2.7; 2.4.2.8	AC5u0009GL000386 or AC5u0009GL001821	Purine metabolism
	Deoxyadenosine deaminase	Deoxyadenosine[c] + H2O[c] + H+[c] => Deoxyinosine[c] + Ammonium[c]	3.5.4.4	AC5u0009GL000758	Purine metabolism
	purine-nucleoside phosphorylase (Deoxyinosine)	Deoxyinosine[c] + Phosphate[c] <=> 2-Deoxy-D-ribose 1-phosphate[c] + Hypoxanthine[c]	2.4.2.1	AC5u0009GL001505	Purine metabolism
	deoxyadenosine kinase	ATP[c] + Deoxyadenosine[c] => ADP[c] + dAMP[c] + H+[c]	2.7.1.76	AC5u0009GL001054 or AC5u0009GL001221	Purine metabolism
	deoxyinosine kinase	ATP[c] + Deoxyinosine[c] => ADP[c] + dIMP[c]	2.7.1.113 ; 2.7.1.145	AC5u0009GL001054 or AC5u0009GL001221	Purine metabolism
	XTP/dITP diphosphohydrolase	dITP[c] + H2O[c] <=> dIMP[c] + Diphosphate[c]	3.6.1.66 ; 3.6.1.-	AC5u0009GL000642 or AC5u0009GL000848 or AC5u0009GL002154 or AC5u0009GL001067	Purine metabolism
	ATP:dIDP phosphotransferase	ATP[c] + dIDP[c] <=> ADP[c] + dITP[c]	2.7.4.6	AC5u0009GL000603	Purine metabolism
	ribonucleoside-diphosphate reductase (ADP)	ADP[c] + Reduced thioredoxin[c] => dADP[c] + H2O[c] + Oxidized thioredoxin[c]	1.17.4.1	AC5u0009GL000755 or AC5u0009GL000756 or AC5u0009GL000645 or AC5u0009GL002151 or AC5u0009GL000828 or AC5u0009GL001087 or AC5u0009GL001491	Purine metabolism
	GMP synthase (glutamine-hydrolysing)	ATP[c] + L-Glutamine[c] + H2O[c] + Xanthosine 5'-phosphate[c] => AMP[c] + L-Glutamate[c] + GMP[c] + 2 H+[c] + Diphosphate[c]	6.3.5.2	AC5u0009GL000967 or AC5u0009GL000459	Purine metabolism
	XTP/dITP diphosphohydrolase	XTP[c] + H2O[c] <=> Xanthosine 5'-phosphate[c] + Diphosphate[c]	3.6.1.66 ; 3.6.1.-	AC5u0009GL000642 or AC5u0009GL000848 or AC5u0009GL002154 or AC5u0009GL001067	Purine metabolism
	5'-nucleotidase (XMP)	H2O[c] + Xanthosine 5'-phosphate[c] => Phosphate[c] + Xanthosine[c]	3.1.3.5	AC5u0009GL001278	Purine metabolism
	purine nucleosidase (xanthosine)	H2O[c] + Xanthosine[c] => D-Ribose[c] + Xanthine[c]	3.2.2.1	AC5u0009GL002084	Purine metabolism
	xanthine phosphoribosyltransferase	5-Phospho-alpha-D-ribose 1-diphosphate[c] + Xanthine[c] => Diphosphate[c] + Xanthosine 5'-phosphate[c]	2.4.2.22; 2.4.2.8	AC5u0009GL000324	Purine metabolism
	5'-nucleotidase (GMP)	GMP[c] + H2O[c] => Guanosine[c] + Phosphate[c]	3.1.3.5	AC5u0009GL001278	Purine metabolism
	purine-nucleoside phosphorylase (Guanosine)	Guanosine[c] + Phosphate[c] <=> Guanine[c] + alpha-D-Ribose 1-phosphate[c]	2.4.2.1; 2.4.2.15	AC5u0009GL001505	Purine metabolism
	guanine phosphoribosyltransferase	Guanine[c] + 5-Phospho-alpha-D-ribose 1-diphosphate[c] => GMP[c] + Diphosphate[c]	2.4.2.7; 2.4.2.8 ; 2.4.2.22	AC5u0009GL000386 or AC5u0009GL001821	Purine metabolism
	purine nucleosidase (guanosine)	Guanosine[c] + H2O[c] => Guanine[c] + D-Ribose[c]	3.2.2.1	AC5u0009GL002084	Purine metabolism
	purine-nucleoside phosphorylase (Deoxyguanosine)	Deoxyguanosine[c] + Phosphate[c] <=> 2-Deoxy-D-ribose 1-phosphate[c] + Guanine[c]	2.4.2.1; 2.4.2.4	AC5u0009GL001505	Purine metabolism
	5'-nucleotidase (dGMP)	dGMP[c] + H2O[c] => Deoxyguanosine[c] + Phosphate[c]	3.1.3.5; 3.1.3.89	AC5u0009GL001278	Purine metabolism
	deoxyguanosine kinase	ATP[c] + Deoxyguanosine[c] => ADP[c] + dGMP[c] + H+[c]	2.7.1.113 ; 2.7.1.145 ; 2.7.1.74	AC5u0009GL001054 or AC5u0009GL001221	Purine metabolism
	ATP:dGMP phosphotransferase	ATP[c] + dGMP[c] <=> ADP[c] + dGDP[c]	2.7.4.8	AC5u0009GL000028	Purine metabolism
	ribonucleoside-diphosphate reductase (GDP)	GDP[c] + Reduced thioredoxin[c] => dGDP[c] + H2O[c] + Oxidized thioredoxin[c]	1.17.4.1	AC5u0009GL000755 or AC5u0009GL000756	Purine metabolism
	nucleoside-diphosphate kinase (ATP:dGDP)	ATP[c] + dGDP[c] <=> ADP[c] + dGTP[c]	2.7.4.6	AC5u0009GL000603	Purine metabolism
	GTP diphosphokinase	ATP[c] + GTP[c] => AMP[c] + Guanosine 3'-diphosphate 5'-triphosphate[c] + H+[c]	2.7.6.5	AC5u0009GL000405 or AC5u0009GL001811 or AC5u0009GL000169	Purine metabolism
	guanosine 3'-diphosphate 5'-triphosphate 5'-phosphohydrolase	Guanosine 3'-diphosphate 5'-triphosphate[c] + H2O[c] <=> Guanosine 3',5'-bis(diphosphate)[c] + Phosphate[c]	3.6.1.11 ; 3.6.1.40	AC5u0009GL000600 or AC5u0009GL000771 or AC5u0009GL000769	purine metabolism
	guanosine-3',5'-bis(diphosphate) 3'-diphosphatase	Guanosine 3',5'-bis(diphosphate)[c] + H2O[c] => GDP[c] + Diphosphate[c]	3.1.7.2	AC5u0009GL000169	purine metabolism
	exopolyphosphatase	H2O[c] + Inorganic triphosphate[c] => H+[c] + Phosphate[c] + Diphosphate[c]	3.6.1.11 ; 3.6.1.40	AC5u0009GL000600 or AC5u0009GL000771 or AC5u0009GL000769	purine metabolism
	bis(5'-nucleosyl)-tetraphosphatase	P1,P4-Bis(5'-adenosyl) tetraphosphate[c] + H2O[c] => 2 ADP[c] + 2 H+[c]	3.6.1.41	AC5u0009GL001465	Purine metabolism
	adenylate kinase	ATP[c] + dAMP[c] <=> ADP[c] + dADP[c]	2.7.4.3	AC5u0009GL000309	Purine metabolism
	nucleoside-diphosphate kinase (ATP:dADP)	ATP[c] + dADP[c] <=> ADP[c] + dATP[c]	2.7.4.6	AC5u0009GL000603	Purine metabolism
	guanylate kinase (GMP:ATP)	ATP[c] + GMP[c] <=> ADP[c] + GDP[c]	2.7.4.8	AC5u0009GL000028	Purine metabolism
	purine-nucleoside phosphorylase (Inosine)	Inosine[c] + Phosphate[c] <=> Hypoxanthine[c] + alpha-D-Ribose 1-phosphate[c]	2.4.2.1; 2.4.2.15	AC5u0009GL001505	Purine metabolism
	purine-nucleoside phosphorylase (Adenosine)	Adenosine[c] + Phosphate[c] <=> Adenine[c] + alpha-D-Ribose 1-phosphate[c]	2.4.2.1	AC5u0009GL001505	Purine metabolism
	purine-nucleoside phosphorylase (Xanthosine)	Phosphate[c] + Xanthosine[c] <=> alpha-D-Ribose 1-phosphate[c] + Xanthine[c]	2.4.2.-; 2.4.2.1	AC5u0009GL001505	Purine metabolism
	nucleoside-diphosphate kinase (ATP:UDP)	ATP[c] + UDP[c] <=> ADP[c] + UTP[c]	2.7.4.6	AC5u0009GL000603	Pyrimidine metabolism
	uridylate kinase (UMP)	ATP[c] + UMP[c] <=> ADP[c] + UDP[c]	2.7.4.14; 2.7.4.22; 2.7.4.4	AC5u0009GL001574	Pyrimidine metabolism
	nucleoside-diphosphate kinase (ATP:CDP)	ATP[c] + CDP[c] <=> ADP[c] + CTP[c]	2.7.4.6	AC5u0009GL000603	Pyrimidine metabolism
	cytidylate kinase (CMP)	ATP[c] + CMP[c] <=> ADP[c] + CDP[c]	2.7.4.14; 2.7.4.25	AC5u0009GL001574	Pyrimidine metabolism
	uridine kinase (ATP:Uridine)	ATP[c] + Uridine[c] => ADP[c] + H+[c] + UMP[c]	2.7.1.213; 2.7.1.48	AC5u0009GL000071	Pyrimidine metabolism
	CTP synthase (NH3)	ATP[c] + Ammonium[c] + UTP[c] => ADP[c] + CTP[c] + 2 H+[c] + Phosphate[c]	6.3.4.2	AC5u0009GL000571	Pyrimidine metabolism
	dTMP kinase	ATP[c] + dTMP[c] <=> ADP[c] + dTDP[c]	2.7.4.12; 2.7.4.13; 2.7.4.9	AC5u0009GL000763	Pyrimidine metabolism
	nucleoside-diphosphate kinase (ATP:dTDP)	ATP[c] + dTDP[c] <=> ADP[c] + dTTP[c]	2.7.4.6	AC5u0009GL000603	Pyrimidine metabolism
	deoxyuridine kinase (ATP:Deoxyuridine)	ATP[c] + Deoxyuridine[c] => ADP[c] + dUMP[c] + H+[c]	2.7.1.21 ; 2.7.1.145	AC5u0009GL000120	Pyrimidine metabolism
	thymidylate synthase	dUMP[c] + 5,10-Methylenetetrahydrofolate[c] => 7,8-Dihydrofolate[c] + dTMP[c]	2.1.1.45	AC5u0009GL001567	Pyrimidine metabolism
	ribonucleoside-triphosphate reductase (CTP)	CTP[c] + Reduced thioredoxin[c] => dCTP[c] + H2O[c] + Oxidized thioredoxin[c]	1.17.4.2	AC5u0009GL001026 or AC5u0009GL001728 or AC5u0009GL001940	Pyrimidine metabolism
	dihydroorotase	(S)-Dihydroorotate[c] + H2O[c] <=> N-Carbamoyl-L-aspartate[c] + H+[c]	3.5.2.3	AC5u0009GL001496	Pyrimidine metabolism
	dihydoorotic acid dehydrogenase (NAD)	(S)-Dihydroorotate[c] + Nicotinamide adenine dinucleotide[c] <=> H+[c] + Nicotinamide adenine dinucleotide - reduced[c] + Orotate[c]	1.3.1.14	AC5u0009GL001495	Pyrimidine metabolism
	orotate phosphoribosyltransferase	Orotidine 5'-phosphate[c] + Diphosphate[c] <=> Orotate[c] + 5-Phospho-alpha-D-ribose 1-diphosphate[c]	2.4.2.10	AC5u0009GL001493	Pyrimidine metabolism
	orotidine-5'-phosphate decarboxylase	H+[c] + Orotidine 5'-phosphate[c] => CO2[c] + UMP[c]	4.1.1.23	AC5u0009GL001494	Pyrimidine metabolism
	uracil phosphoribosyltransferase	5-Phospho-alpha-D-ribose 1-diphosphate[c] + Uracil[c] => Diphosphate[c] + UMP[c]	2.4.2.9	AC5u0009GL000115	Pyrimidine metabolism
	5'-nucleotidase (UMP)	H2O[c] + UMP[c] => Phosphate[c] + Uridine[c]	3.1.3.5	AC5u0009GL001278	Pyrimidine metabolism
	uridine kinase (ITP:Uridine)	ITP[c] + Uridine[c] => H+[c] + IDP[c] + UMP[c]	2.7.1.48	AC5u0009GL000071	Pyrimidine metabolism
	uridine kinase (GTP:Uridine)	GTP[c] + Uridine[c] => GDP[c] + H+[c] + UMP[c]	2.7.1.48	AC5u0009GL000071	Pyrimidine metabolism
	pyrimidine nucleosidase (uridine)	H2O[c] + Uridine[c] => D-Ribose[c] + Uracil[c]	3.2.2.3	AC5u0009GL001662 or AC5u0009GL001778	Pyrimidine metabolism
	dihydrouracil dehydrogenase (NADP)	5,6-dihydrouracil[c] + Nicotinamide adenine dinucleotide phosphate[c] <=> H+[c] + Nicotinamide adenine dinucleotide phosphate - reduced[c] + Uracil[c]	1.3.1.1 ; 1.3.1.2	AC5u0009GL001033 or AC5u0009GL001034	Pyrimidine metabolism
	Cytosine deaminase	Cytosine[c] + H2O[c] + H+[c] => Ammonium[c] + Uracil[c]	3.5.4.1	AC5u0009GL000758 or AC5u0009GL000377	Pyrimidine metabolism
	pyrimidine-nucleoside phosphorylase (cytosine)	Cytosine[c] + alpha-D-Ribose 1-phosphate[c] <=> Cytidine[c] + Phosphate[c]	2.4.2.2	AC5u0009GL001506	Pyrimidine metabolism
	cytidine deaminase	Cytidine[c] + H2O[c] + H+[c] => Ammonium[c] + Uridine[c]	3.5.4.5	AC5u0009GL001387	Pyrimidine metabolism
	5'-nucleotidase (CMP)	CMP[c] + H2O[c] => Cytidine[c] + Phosphate[c]	3.1.3.5; 3.1.3.91	AC5u0009GL001278	Pyrimidine metabolism
	cytidine kinase (ITP)	Cytidine[c] + ITP[c] => CMP[c] + H+[c] + IDP[c]	2.7.1.213; 2.7.1.48	AC5u0009GL000071	Pyrimidine metabolism
	cytidine kinase (ATP)	ATP[c] + Cytidine[c] => ADP[c] + CMP[c] + H+[c]	2.7.1.213 ; 2.7.1.48	AC5u0009GL000071	Pyrimidine metabolism
	cytidine kinase (GTP)	Cytidine[c] + GTP[c] => CMP[c] + GDP[c] + H+[c]	2.7.1.213; 2.7.1.48	AC5u0009GL000071	Pyrimidine metabolism
	CTP synthase (glutamine)	ATP[c] + L-Glutamine[c] + H2O[c] + UTP[c] => ADP[c] + CTP[c] + L-Glutamate[c] + 2 H+[c] + Phosphate[c]	6.3.4.2	AC5u0009GL000571 or AC5u0009GL000351 or AC5u0009GL000367	Pyrimidine metabolism
	nucleoside-diphosphate kinase (ATP:dCDP)	ATP[c] + dCDP[c] <=> ADP[c] + dCTP[c]	2.7.4.6	AC5u0009GL000603	Pyrimidine metabolism
	ribonucleoside-diphosphate reductase (CDP)	CDP[c] + Reduced thioredoxin[c] => dCDP[c] + H2O[c] + Oxidized thioredoxin[c]	1.17.4.1	AC5u0009GL000755 or AC5u0009GL000756	Pyrimidine metabolism
	cytidylate kinase (dCMP)	ATP[c] + dCMP[c] <=> ADP[c] + dCDP[c]	2.7.4.13; 2.7.4.14; 2.7.4.25	AC5u0009GL001574	Pyrimidine metabolism
	deoxycytidine deaminase	Deoxycytidine[c] + H2O[c] + H+[c] => Deoxyuridine[c] + Ammonium[c]	3.5.4.5	AC5u0009GL001387	Pyrimidine metabolism
	5'-nucleotidase (dCMP)	dCMP[c] + H2O[c] => Deoxycytidine[c] + Phosphate[c]	3.1.3.5 ; 3.1.3.89	AC5u0009GL001278	Pyrimidine metabolism
	5'-nucleotidase (dUMP)	dUMP[c] + H2O[c] => Deoxyuridine[c] + Phosphate[c]	3.1.3.5; 3.1.3.89	AC5u0009GL001278	Pyrimidine metabolism
	dUTP diphosphatase	dUTP[c] + H2O[c] => dUMP[c] + H+[c] + Diphosphate[c]	3.6.1.-; 3.6.1.23 ; 3.6.1.8 ; 3.6.1.9	AC5u0009GL000733	Pyrimidine metabolism
	thymidine kinase (ATP:thymidine)	ATP[c] + Thymidine[c] => ADP[c] + dTMP[c] + H+[c]	2.7.1.21	AC5u0009GL000120	Pyrimidine metabolism
	thymidine kinase (GTP:Thymidine)	GTP[c] + Thymidine[c] => dTMP[c] + GDP[c] + H+[c]	3.1.3.5	AC5u0009GL000120	Pyrimidine metabolism
	5'-nucleotidase (dTMP)	dTMP[c] + H2O[c] => Phosphate[c] + Thymidine[c]	3.1.3.5; 3.1.3.89 ; 3.1.3.35	AC5u0009GL001278	Pyrimidine metabolism
	5-Methylcytosine aminohydrolase	5-Methylcytosine[c] + H2O[c] <=> Thymine[c] + Ammonium[c]	3.5.4.1	AC5u0009GL000758 or AC5u0009GL000377	Pyrimidine metabolism
	(R)-5,6-dihydrothymine:NAD+ oxidoreductase	(R)-5,6-Dihydrothymine[c] + Nicotinamide adenine dinucleotide[c] <=> Thymine[c] + Nicotinamide adenine dinucleotide - reduced[c] + H+[c]	1.3.1.1 ; 1.3.1.2	AC5u0009GL001033 or AC5u0009GL001034	Pyrimidine metabolism
	ribonucleoside-diphosphate reductase (UDP)	Reduced thioredoxin[c] + UDP[c] => dUDP[c] + H2O[c] + Oxidized thioredoxin[c]	1.17.4.1	AC5u0009GL000755 or AC5u0009GL000756 or AC5u0009GL000645 or AC5u0009GL002151 or AC5u0009GL000828 or AC5u0009GL001087 or AC5u0009GL001491	Pyrimidine metabolism
	uridylate kinase (dUMP)	ATP[c] + dUMP[c] => ADP[c] + dUDP[c]	2.7.4.9	AC5u0009GL001574 or AC5u0009GL000199	Pyrimidine metabolism
	nucleoside-diphosphate kinase (ATP:dUDP)	ATP[c] + dUDP[c] <=> ADP[c] + dUTP[c]	2.7.4.6	AC5u0009GL000603	Pyrimidine metabolism
	ribonucleoside-triphosphate reductase (UTP)	Reduced thioredoxin[c] + UTP[c] => dUTP[c] + H2O[c] + Oxidized thioredoxin[c]	1.17.4.2	AC5u0009GL001026 or AC5u0009GL001728 or AC5u0009GL001940	Pyrimidine metabolism
	pyrimidine-nucleoside phosphorylase (thymine)	2-Deoxy-D-ribose 1-phosphate[c] + Thymine[c] <=> Phosphate[c] + Thymidine[c]	2.4.2.2 ; 2.4.2.4	AC5u0009GL001506	Pyrimidine metabolism
	yUMP synthetase	alpha-D-Ribose 5-phosphate[c] + Uracil[c] <=> H2O[c] + Pseudouridine 5'-phosphate[c]		AC5u0009GL000319 or AC5u0009GL001243 or AC5u0009GL001809 or AC5u0009GL000186 or AC5u0009GL001528 or AC5u0009GL001489	Pyrimidine metabolism
	purine-nucleoside phosphatase (deoxyuridine)	Deoxyuridine[c] + Phosphate[c] <=> 2-Deoxy-D-ribose 1-phosphate[c] + Uracil[c]	2.4.2.1; 2.4.2.2; 2.4.2.3; 2.4.2.4	AC5u0009GL001505	Pyrimidine metabolism
	pyrimidine-nucleoside phosphorylase (uracil)	Phosphate[c] + Uridine[c] <=> alpha-D-Ribose 1-phosphate[c] + Uracil[c]	2.4.2.3	AC5u0009GL001506	Pyrimidine metabolism
	malolactic enzyme	H+[c] + L-Malate[c] => CO2[c] + L-Lactate[c]	1.1.1.38	AC5u0009GL001119 or AC5u0009GL001113	Pyruvate metabolism
	acetate kinase	Acetate[c] + ATP[c] <=> Acetyl phosphate[c] + ADP[c]	2.7.2.1; 2.7.2.15	AC5u0009GL000624 or AC5u0009GL001911 or AC5u0009GL002172	Pyruvate metabolism
	acetyl-CoA carboxylase	Acetyl-CoA[c] + ATP[c] + Bicarbonate[c] => ADP[c] + H+[c] + Malonyl-CoA[c] + Phosphate[c]	6.4.1.2	AC5u0009GL001601 or AC5u0009GL000226 or AC5u0009GL000222 or AC5u0009GL000223 or AC5u0009GL000224	Pyruvate metabolism
	acetyl-CoA C-acetyltransferase	2 Acetyl-CoA[c] <=> Acetoacetyl-CoA[c] + Coenzyme A[c]	2.3.1.9	AC5u0009GL000410	Pyruvate metabolism
	aldehyde dehydrogenase (acetaldehyde, NAD)	Acetaldehyde[c] + H2O[c] + Nicotinamide adenine dinucleotide[c] => Acetate[c] + 2 H+[c] + Nicotinamide adenine dinucleotide - reduced[c]	1.2.1.3; 1.2.1.5	AC5u0009GL000754	Pyruvate metabolism
	acylphosphatase	Acetyl phosphate[c] + H2O[c] => Acetate[c] + H+[c] + Phosphate[c]	3.6.1.7	AC5u0009GL000078	pyruvate metabolism
	D-lactate dehydrogenase	D-Lactate[c] + Nicotinamide adenine dinucleotide[c] <=> H+[c] + Nicotinamide adenine dinucleotide - reduced[c] + Pyruvate[c]	1.1.1.28	AC5u0009GL000202 or AC5u0009GL001632 or AC5u0009GL000420 or AC5u0009GL000955	Pyruvate metabolism
	alcohol dehydrogenase (ethanol: NAD)	Ethanol[c] + Nicotinamide adenine dinucleotide[c] <=> Acetaldehyde[c] + H+[c] + Nicotinamide adenine dinucleotide - reduced[c]	1.1.1.1; 1.1.1.71	AC5u0009GL000790 or AC5u0009GL000754 or AC5u0009GL001289 or AC5u0009GL001680 or AC5u0009GL001858	Pyruvate metabolism
	acetaldehyde dehydrogenase (acetylating)	Acetaldehyde[c] + Coenzyme A[c] + Nicotinamide adenine dinucleotide[c] <=> Acetyl-CoA[c] + H+[c] + Nicotinamide adenine dinucleotide - reduced[c]	1.2.1.10	AC5u0009GL000754	Pyruvate metabolism
	phosphotransacetylase	Acetyl-CoA[c] + Phosphate[c] <=> Acetyl phosphate[c] + Coenzyme A[c]	2.3.1.8	AC5u0009GL000976	Pyruvate metabolism
	L-lactate dehydrogenase	L-Lactate[c] + Nicotinamide adenine dinucleotide[c] <=> H+[c] + Nicotinamide adenine dinucleotide - reduced[c] + Pyruvate[c]	1.1.1.27	AC5u0009GL000175 or AC5u0009GL000844 or AC5u0009GL001071 or AC5u0009GL001116 or AC5u0009GL001747 or AC5u0009GL000468 or AC5u0009GL000611 or AC5u0009GL000177 or AC5u0009GL000795 or AC5u0009GL000796 or AC5u0009GL000797	Pyruvate metabolism
	L-2-hydroxyisocaproate dehydrogenase	4-Methyl-2-oxopentanoate[c] + H+[c] + Nicotinamide adenine dinucleotide - reduced[c] <=> L-2-hydroxyisocaproate[c] + Nicotinamide adenine dinucleotide[c]		AC5u0009GL000468 or AC5u0009GL000611 or AC5u0009GL001170	Pyruvate metabolism
	GTP cyclohydrolase II	GTP[c] + 3 H2O[c] => 2,5-Diamino-6-hydroxy-4-(5'-phosphoribosylamino)-pyrimidine[c] + Formate[c] + 2 H+[c] + Diphosphate[c]	3.5.4.25	AC5u0009GL000911 or AC5u0009GL001775	Riboflavin metabolism
	diaminohydroxyphosphoribosylaminopyrimidine deaminase	2,5-Diamino-6-hydroxy-4-(5'-phosphoribosylamino)-pyrimidine[c] + H2O[c] + H+[c] => 5-Amino-6-(5'-phosphoribosylamino)uracil[c] + Ammonium[c]	3.5.4.26	AC5u0009GL001777	Riboflavin metabolism
	5-amino-6-(5-phosphoribosylamino)uracil reductase	5-Amino-6-(5'-phosphoribosylamino)uracil[c] + H+[c] + Nicotinamide adenine dinucleotide phosphate - reduced[c] => 5-Amino-6-(5'-phosphoribitylamino)uracil[c] + Nicotinamide adenine dinucleotide phosphate[c]	1.1.1.193	AC5u0009GL001777	Riboflavin metabolism
	FMN hydrolase / 5-amino-6-(5-phospho-D-ribitylamino)uracil phosphatase	5-Amino-6-(5'-phosphoribitylamino)uracil[c] + H2O[c] <=> 4-(1-D-Ribitylamino)-5-aminouracil[c] + Phosphate[c]	3.1.3.104	AC5u0009GL001752 or AC5u0009GL000858	Riboflavin metabolism
	3,4-Dihydroxy-2-butanone-4-phosphate	D-Ribulose 5-phosphate[c] => 3,4-dihydroxy-2-butanone 4-phosphate[c] + Formate[c] + H+[c]	4.1.99.12	AC5u0009GL000911 or AC5u0009GL001775	Riboflavin metabolism
	riboflavin synthase	4-(1-D-Ribitylamino)-5-aminouracil[c] + 3,4-dihydroxy-2-butanone 4-phosphate[c] => 6,7-Dimethyl-8-(1-D-ribityl)lumazine[c] + 2 H2O[c] + Phosphate[c]	2.5.1.78 ; 2.5.1.9	AC5u0009GL001776 or AC5u0009GL001774	Riboflavin metabolism
	riboflavin synthase	2 6,7-Dimethyl-8-(1-D-ribityl)lumazine[c] <=> Riboflavin[c] + 4-(1-D-Ribitylamino)-5-aminouracil[c]	2.5.1.9	AC5u0009GL001776	Riboflavin metabolism
	riboflavin kinase	ATP[c] + Riboflavin[c] => ADP[c] + flavin mononucleotide[c] + H+[c]	2.7.1.26	AC5u0009GL000185	Riboflavin metabolism
	FMN hydrolase / 5-amino-6-(5-phospho-D-ribitylamino)uracil phosphatase	flavin mononucleotide[c] + H2O[c] <=> Riboflavin[c] + Phosphate[c]	3.1.3.102 ; 3.1.3.2	AC5u0009GL000858	Riboflavin metabolism
	flavin reductase / FMN reductase (NADPH)	H+[c] + Nicotinamide adenine dinucleotide phosphate - reduced[c] + Riboflavin[c] => Nicotinamide adenine dinucleotide phosphate[c] + Reduced riboflavin[c]	1.5.1.30 ; 1.5.1.36 ; 1.5.1.41 / 1.5.1.38	AC5u0009GL001307 or AC5u0009GL001308	Riboflavin metabolism
	FMN reductase	flavin mononucleotide[c] + H+[c] + Nicotinamide adenine dinucleotide - reduced[c] <=> Nicotinamide adenine dinucleotide[c] + Reduced FMN[c]	1.5.1.-; 1.5.1.36; 1.5.1.39; 1.5.1.41; 1.5.1.42	AC5u0009GL001904	Riboflavin metabolism
	riboflavin kinase / FMN adenylyltransferase	ATP[c] + flavin mononucleotide[c] + H+[c] => FAD[c] + Diphosphate[c]	2.7.7.2	AC5u0009GL000185	Riboflavin metabolism
	selenocysteine lyase	Reduced dithiothreitol[c] + L-Selenocysteine[c] => Selenide[c] + L-Alanine[c] + Oxidized dithiothreitol[c] + H+[c]	4.4.1.16	AC5u0009GL000683 or AC5u0009GL001347 or AC5u0009GL001760	Selenocompound metabolism
	methaneselenol:NADP+ oxidoreductase	2 Nicotinamide adenine dinucleotide phosphate - reduced[c] + 2 H+[c] + Methylselenic acid[c] <=> 2 Nicotinamide adenine dinucleotide phosphate[c] + 2 H2O[c] + Methaneselenol[c]	1.8.1.9	AC5u0009GL000798 or AC5u0009GL001474 or AC5u0009GL000835 or AC5u0009GL001080	Selenocompound metabolism
	hydrogen selenide:NADP+ oxidoreductase	Selenide[c] + 3 Nicotinamide adenine dinucleotide phosphate - reduced[c] + 3 H2O[c] <=> Selenite[c] + 3 Nicotinamide adenine dinucleotide phosphate[c] + 5 H+[c]	1.8.1.9	AC5u0009GL000798 or AC5u0009GL001474 or AC5u0009GL000835 or AC5u0009GL001080	Selenocompound metabolism
	cystathionine beta-lyase	L-Selenomethionine[c] + H2O[c] <=> Methaneselenol[c] + Ammonium[c] + 2-Oxobutanoate[c]	4.4.1.1	AC5u0009GL000727	Selenocompound metabolism
	cystathionine beta-lyase	Se-Methyl-L-selenocysteine[c] + H2O[c] <=> Pyruvate[c] + Ammonium[c] + Methaneselenol[c]	4.4.1.1	AC5u0009GL000726	Selenocompound metabolism
	5-methyltetrahydropteroyltri-L-glutamate:L-selenohomocysteine Se-methyltransferase	Selenohomocysteine[c] + 5-Methyltetrahydropteroyltri-L-glutamate[c] <=> L-Selenomethionine[c] + Tetrahydropteroyltri-L-glutamate[c]	2.1.1.14	AC5u0009GL000437	Selenocompound metabolism
	lysylphosphatidyl-glycerol synthetase	L-Lysine-tRNA (Lys)[c] + Phospatidylglycerol (LRE specific)[c] => 1-lysyl-phosphatidyl glycerol (LRE specific)[c] + tRNA(Lys)[c]	2.3.2.3	AC5u0009GL001244	Signal transduction
	Copper export via ATPase	ATP[c] + Cu2+[c] + H2O[c] => ADP[c] + Cu2+[e] + H+[c] + Phosphate[c]	3.6.3.-; 3.6.3.4 ; 7.2.2.9	AC5u0009GL000138	Signal transduction
	alpha-glucoside glucohydrolase	H2O[c] + Sucrose[c] => D-Fructose[c] + D-Glucose[c]	3.2.1.20 ; 3.2.1.10	AC5u0009GL000274	Starch or sucrose metabolism
	alpha-glucosidase	H2O[c] + Maltose[c] => 2 D-Glucose[c]	3.2.1.20	AC5u0009GL000274	Starch or sucrose metabolism
	Sucrose phosphorylase	Phosphate[c] + Sucrose[c] => D-Fructose[c] + D-Glucose 1-phosphate[c]	2.4.1.7	AC5u0009GL001434	Starch or sucrose metabolism
	glucose-1-phosphate phosphodismutase	2 D-Glucose 1-phosphate[c] => D-Glucose 1,6-bisphosphate[c] + D-Glucose[c]	2.7.1.41	AC5u0009GL000407	Starch or sucrose metabolism
	cyclomaltodextrinase / maltogenic alpha-amylase / neopullulanase	Maltodextrin[c] + H2O[c] <=> Maltose[c]	3.2.1.133	AC5u0009GL002111	Starch or sucrose metabolism
	cyclomaltodextrinase / maltogenic alpha-amylase / neopullulanase	Cyclomaltodextrin[c] + H2O[c] <=> Maltodextrin[c]	3.2.1.54	AC5u0009GL002111	Starch or sucrose metabolism
	levansucrase	Sucrose[e] => D-Glucose[e] + Levan[e]	2.4.1.10	AC5u0009GL000236 or AC5u0009GL000237 or AC5u0009GL000238 or AC5u0009GL000239	Starch or sucrose metabolism
	maltose phosphorylase	Maltose[c] + Phosphate[c] <=> beta-D-Glucose 1-phosphate[c] + D-Glucose[c]	2.4.1.8	AC5u0009GL000408 or AC5u0009GL001824	Starch or sucrose metabolism
	b-phosphoglucomutase	beta-D-glucose 6-phosphate[c] <=> beta-D-Glucose 1-phosphate[c]	5.4.2.6	AC5u0009GL000407	Starch or sucrose metabolism
	maltose phosphorylase	Phosphate[c] + Trehalose[c] <=> beta-D-Glucose 1-phosphate[c] + D-Glucose[c]	2.4.1.64	AC5u0009GL000408	Starch or sucrose metabolism
	ATP:alpha-D-glucose-1-phosphate adenylyltransferase	ATP[c] + D-Glucose 1-phosphate[c] <=> Diphosphate[c] + ADP-glucose[c]	2.7.7.27	AC5u0009GL002164 or AC5u0009GL000632	Starch or sucrose metabolism
	sulfite reductase (Flavodoxin)	5 H+[c] + 3 Nicotinamide adenine dinucleotide phosphate - reduced[c] + Sulfite[c] => 3 H2O[c] + Hydrogen sulfide[c] + 3 Nicotinamide adenine dinucleotide phosphate[c]	1.8.1.2	AC5u0009GL000884	Sulfur metabolism
	cystathionine gamma/beta-lyase	H2O[c] + L-Homocysteine[c] => 2-Oxobutanoate[c] + Hydrogen sulfide[c] + Ammonium[c]	4.4.1.2	AC5u0009GL000726	sulfur metabolism
	bifunctional oligoribonuclease or PAP phosphatase NrnA	3'-Phosphoadenylyl sulfate[c] + H2O[c] <=> Adenylyl sulfate[c] + Phosphate[c]	3.1.3.7	AC5u0009GL000653	sulfur metabolism
	fumarase	Fumarate[c] + H2O[c] <=> L-Malate[c]	4.2.1.2	AC5u0009GL001118	TCA cycle
	Malate/lactate dehydrogenase	L-Malate[c] + Nicotinamide adenine dinucleotide[c] <=> H+[c] + Nicotinamide adenine dinucleotide - reduced[c] + Oxaloacetate[c]	1.1.1.299; 1.1.1.37	AC5u0009GL001170	TCA cycle
	dihydrolipoamide dehydrogenase	2-Oxoglutarate[c] + Coenzyme A[c] + Nicotinamide adenine dinucleotide[c] => Succinyl-CoA[c] + CO2[c] + Nicotinamide adenine dinucleotide - reduced[c]	1.8.1.4	AC5u0009GL001377	TCA cycle
	fumarate reductase	Fumarate[c] + Menaquinol 7[c] => Menaquinone 7[c] + Succinate[c]	1.3.5.1 ; 1.3.5.4	AC5u0009GL001117	TCA cycle
	isocitrate dehydrogenase (NADP)	Isocitrate[c] + Nicotinamide adenine dinucleotide phosphate[c] <=> 2-Oxoglutarate[c] + CO2[c] + Nicotinamide adenine dinucleotide phosphate - reduced[c]	1.1.1.42	AC5u0009GL001348	TCA cycle
	mevalonate kinase (gtp)	GTP[c] + (R)-Mevalonate[c] => (R)-5-Phosphomevalonate[c] + GDP[c] + H+[c]	2.7.1.36	AC5u0009GL001737	Terpenoid backbone biosynthesis
	phosphomevalonate kinase	(R)-5-Phosphomevalonate[c] + ATP[c] => (R)-5-Diphosphomevalonate[c] + ADP[c]	2.7.4.2	AC5u0009GL001739	Terpenoid backbone biosynthesis
	diphosphomevalonate decarboxylase	(R)-5-Diphosphomevalonate[c] + ATP[c] => ADP[c] + CO2[c] + Isopentenyl diphosphate[c] + Phosphate[c]	4.1.1.33	AC5u0009GL001738	Terpenoid backbone biosynthesis
	isopentenyl-diphosphate D-isomerase	Isopentenyl diphosphate[c] <=> Dimethylallyl diphosphate[c]	5.3.3.2	AC5u0009GL001740	Terpenoid backbone biosynthesis
	dimethylallyltranstransferase	Dimethylallyl diphosphate[c] + Isopentenyl diphosphate[c] => Geranyl diphosphate[c] + Diphosphate[c]	2.5.1.1	AC5u0009GL000033 or AC5u0009GL002178	Terpenoid backbone biosynthesis
	geranyltranstransferase	Geranyl diphosphate[c] + Isopentenyl diphosphate[c] => Farnesyl diphosphate[c] + Diphosphate[c]	2.5.1.10	AC5u0009GL000033 or AC5u0009GL002178	Terpenoid backbone biosynthesis
	Undecaprenyl diphosphate synthase	Farnesyl diphosphate[c] + 8 Isopentenyl diphosphate[c] => 8 Diphosphate[c] + Undecaprenyl diphosphate[c]	2.5.1.-; 2.5.1.31	AC5u0009GL002178 or AC5u0009GL000197 or AC5u0009GL000033	Terpenoid backbone biosynthesis
	mevalonate kinase (ctp)	CTP[c] + (R)-Mevalonate[c] => (R)-5-Phosphomevalonate[c] + CDP[c] + H+[c]	2.7.1.36	AC5u0009GL001737	Terpenoid backbone biosynthesis
	mevalonate kinase (utp)	(R)-Mevalonate[c] + UTP[c] => (R)-5-Phosphomevalonate[c] + H+[c] + UDP[c]	2.7.1.36	AC5u0009GL001737	Terpenoid backbone biosynthesis
	mevalonate kinase	ATP[c] + (R)-Mevalonate[c] => (R)-5-Phosphomevalonate[c] + ADP[c] + H+[c]	2.7.1.36	AC5u0009GL001737	Terpenoid backbone biosynthesis
	4-(cytidine 5'-diphospho)-2-C-methyl-D-erythritol kinase	4-(cytidine 5'-diphospho)-2-C-methyl-D-erythritol[c] + ATP[c] => 2-phospho-4-(cytidine 5'-diphospho)-2-C-methyl-D-erythritol[c] + ADP[c] + H+[c]	2.7.1.148	AC5u0009GL000589	Terpenoid backbone biosynthesis
	tRNA dimethylallyltransferase	Dimethylallyl diphosphate[c] + tRNA adenine[c] <=> Diphosphate[c] + tRNA containing 6-isopentenyladenosine[c]	2.5.1.75	AC5u0009GL000058	Terpenoid backbone biosynthesis
	farnesyltranstransferase	Farnesyl diphosphate[c] + Isopentenyl diphosphate[c] => Geranylgeranyl diphosphate[c] + Diphosphate[c]	2.5.1.29	AC5u0009GL000033 or AC5u0009GL002178	Terpenoid backbone biosynthesis
	undecaprenyl-diphosphate synthase	all-trans-Decaprenyl diphosphate[c] + Isopentenyl diphosphate[c] => Diphosphate[c] + Undecaprenyl diphosphate[c]	2.5.1.-; 2.5.1.31	AC5u0009GL000197	Terpenoid backbone biosynthesis
	1-deoxy-D-xylulose 5-phosphate synthase	Glyceraldehyde 3-phosphate[c] + H+[c] + Pyruvate[c] => CO2[c] + 1-deoxy-D-xylulose 5-phosphate[c]	2.2.1.7	AC5u0009GL000870	Terpenoid backbone biosynthesis
	Hydroxymethylglutaryl CoA reductase	Coenzyme A[c] + (R)-Mevalonate[c] + 2 Nicotinamide adenine dinucleotide phosphate[c] <=> 2 H+[c] + Hydroxymethylglutaryl-CoA[c] + 2 Nicotinamide adenine dinucleotide phosphate - reduced[c]	1.1.1.88 ; 1.1.1.34	AC5u0009GL000599	Terpenoid backbone biosynthesis
	Hydroxymethylglutaryl CoA synthase	Coenzyme A[c] + H+[c] + Hydroxymethylglutaryl-CoA[c] <=> Acetoacetyl-CoA[c] + Acetyl-CoA[c] + H2O[c]	2.3.3.10	AC5u0009GL000209	Terpenoid backbone biosynthesis
	trans-hexaprenyltranstransferase	all-trans-Hexaprenyl diphosphate[c] + Isopentenyl diphosphate[c] => all-trans-Heptaprenyl diphosphate[c] + Diphosphate[c]	2.5.1.-	AC5u0009GL002178	Terpenoid backbone biosynthesis
	thiamine diphosphokinase	ATP[c] + Thiamin[c] => AMP[c] + H+[c] + Thiamine diphosphate[c]	2.7.6.2	AC5u0009GL000018	Thiamine metabolism
	4-amino-5-hydroxymethyl-2-methylpyrimidine synthetase	5-amino-1-(5-phospho-D-ribosyl)imidazole[c] + H2O[c] => 4-Amino-5-hydroxymethyl-2-methylpyrimidine[c] + Glycolaldehyde[c] + 0.5 O2[c] + Phosphate[c]	4.1.99.17	AC5u0009GL001190	Thiamine metabolism
	hydroxymethylpyrimidine kinase (ATP)	4-Amino-5-hydroxymethyl-2-methylpyrimidine[c] + ATP[c] => 4-Amino-2-methyl-5-phosphomethylpyrimidine[c] + ADP[c] + H+[c]	2.7.1.49	AC5u0009GL000270 or AC5u0009GL000843 or AC5u0009GL001072	Thiamine metabolism
	phosphomethylpyrimidine kinase	4-Amino-2-methyl-5-phosphomethylpyrimidine[c] + ATP[c] => 2-Methyl-4-amino-5-hydroxymethylpyrimidine diphosphate[c] + ADP[c]	2.7.4.7	AC5u0009GL000270 or AC5u0009GL000843 or AC5u0009GL001072	Thiamine metabolism
	hydroxyethylthiazole kinase	4-Methyl-5-(2-hydroxyethyl)-thiazole[c] + ATP[c] => 4-Methyl-5-(2-phosphoethyl)-thiazole[c] + ADP[c] + H+[c]	2.7.1.50	AC5u0009GL000269	Thiamine metabolism
	thiamine-phosphate diphosphorylase	2-Methyl-4-amino-5-hydroxymethylpyrimidine diphosphate[c] + 4-Methyl-5-(2-phosphoethyl)-thiazole[c] + H+[c] => Diphosphate[c] + Thiamin monophosphate[c]	2.5.1.3	AC5u0009GL000271	Thiamine metabolism
	adenylate kinase	Thiamin diphosphate[c] + ADP[c] => Thiamin triphosphate[c] + AMP[c]	2.7.4.3	AC5u0009GL000309	Thiamine metabolism
	alkaline phosphatase	Thiamin monophosphate[c] + H2O[c] <=> Thiamine[c] + Phosphate[c]	3.1.3.1 ; 3.1.3.2 ; 3.1.3.100	AC5u0009GL000964 or AC5u0009GL001481 or AC5u0009GL002025 or AC5u0009GL000020	Thiamine metabolism
	thiazole phosphate synthesis	ATP[c] + L-Cysteine[c] + 1-deoxy-D-xylulose 5-phosphate[c] + L-Tyrosine[c] => 4-Hydroxy-benzyl alcohol[c] + 4-Methyl-5-(2-phosphoethyl)-thiazole[c] + L-Alanine[c] + AMP[c] + CO2[c] + H2O[c] + H+[c] + Diphosphate[c]		AC5u0009GL001245	Thiamine metabolism
	thiazole phosphate synthesis	MPT synthase sulfurylated small subunit (MoaD-SH)[c] + 1-deoxy-D-xylulose 5-phosphate[c] + Glycine[c] + Nicotinamide adenine dinucleotide phosphate[c] => 4-Methyl-5-(2-phosphoethyl)-thiazole[c] + MPT synthase small subunit MoaD[c] + CO2[c] + 2 H2O[c] + 2 H+[c] + Nicotinamide adenine dinucleotide phosphate - reduced[c]		AC5u0009GL001245	Thiamine metabolism
	MoaD:cysteine sulfur transferase	MPT synthase small subunit MoaD[c] + ATP[c] + L-Cysteine[c] + H2O[c] => MPT synthase sulfurylated small subunit (MoaD-SH)[c] + AMP[c] + Diphosphate[c] + L-Serine[c]	2.8.1.7	AC5u0009GL000683 or AC5u0009GL001347 or AC5u0009GL001760 or AC5u0009GL000682	Thiamine metabolism
	aspartate transaminase	2-Oxoglutarate[c] + L-Tyrosine[c] <=> 3-(4-Hydroxyphenyl)pyruvate[c] + L-Glutamate[c]	2.6.1.1	AC5u0009GL000780	Tyrosine metabolism
	o-succinylbenzoate-CoA ligase	ATP[c] + Coenzyme A[c] + o-Succinylbenzoate[c] => AMP[c] + Diphosphate[c] + O-Succinylbenzoyl-CoA[c]	6.2.1.26	AC5u0009GL001766	Ubiquinone or other terpenoid-quinone biosynthesis
	naphthoate synthase	O-Succinylbenzoyl-CoA[c] => Coenzyme A[c] + 1,4-Dihydroxy-2-naphthoate[c]	4.1.3.36	AC5u0009GL001767	Ubiquinone or other terpenoid-quinone biosynthesis
	naphthoate synthase	O-Succinylbenzoyl-CoA[c] => 1,4-Dihydroxy-2-naphthoyl-CoA[c] + H2O[c]	4.1.3.36	AC5u0009GL001767	Ubiquinone or other terpenoid-quinone biosynthesis
	1,4-dihydroxy-2-naphthoyl-CoA hydrolase	1,4-Dihydroxy-2-naphthoyl-CoA[c] + H2O[c] <=> 1,4-Dihydroxy-2-naphthoate[c] + Coenzyme A[c]	3.1.2.28	AC5u0009GL001768	Ubiquinone or other terpenoid-quinone biosynthesis
	1,4-dihydroxy-2-naphthoate octaprenyltransferase	all-trans-Polyprenyl diphosphate[c] + 1,4-Dihydroxy-2-naphthoate[c] <=> Demethylmenaquinol[c] + Diphosphate[c] + CO2[c]	2.5.1.74	AC5u0009GL002179	Ubiquinone or other terpenoid-quinone biosynthesis
	S-adenosylmethione:2-demthylmenaquinone methyltransferase (menaquinone 7)	Demethylmenaquinol[c] + S-Adenosyl-L-methionine[c] <=> Menaquinol[c] + S-Adenosyl-L-homocysteine[c]	2.1.1.163	AC5u0009GL001463	Ubiquinone or other terpenoid-quinone biosynthesis
	S-adenosylmethione:2-demethylmenaquinone methyltransferase	2-Demethylmenaquinone 8[c] + S-Adenosyl-L-methionine[c] => S-Adenosyl-L-homocysteine[c] + H+[c] + Menaquinone 8[c]	2.1.1.163	AC5u0009GL001463	Ubiquinone or other terpenoid-quinone biosynthesis
	S-adenosylmethione:2-demthylmenaquinone methyltransferase (menaquinone 7)	2-Demethylmenaquinone 7[c] + S-Adenosyl-L-methionine[c] + Nicotinamide adenine dinucleotide phosphate - reduced[c] => S-Adenosyl-L-homocysteine[c] + Menaquinol 7[c] + Nicotinamide adenine dinucleotide phosphate[c]	2.1.1.163	AC5u0009GL001463	Ubiquinone or other terpenoid-quinone biosynthesis
	2-aceto-2-hydroxybutanoate synthase	2-Oxobutanoate[c] + H+[c] + Pyruvate[c] => (S)-2-Aceto-2-hydroxybutanoate[c] + CO2[c]	2.2.1.6	AC5u0009GL000907	Valine, leucine or isoleucine biosynthesis
	aromatic amino acid aminotransferase - tryptophan	(S)-3-Methyl-2-oxopentanoate[c] + L-Tryptophan[c] <=> L-Isoleucine[c] + Indolepyruvate[c]	2.6.1.6; 2.6.1.42	AC5u0009GL000055 or AC5u0009GL000419 or AC5u0009GL001361 or AC5u0009GL001591 or AC5u0009GL001956	Valine, leucine or isoleucine degradation
	pyridoxal kinase (Pyridoxal)	ATP[c] + Pyridoxal[c] => ADP[c] + H+[c] + Pyridoxal 5'-phosphate[c]	2.7.1.35	AC5u0009GL000270 or AC5u0009GL000843 or AC5u0009GL001072	vitamin B6 metabolism
	hypothetical enzyme	H2O[c] + Pyridoxamine 5'-phosphate[c] => Phosphate[c] + Pyridoxamine[c]	3.1.3.74	AC5u0009GL000581 or AC5u0009GL000992	vitamin B6 metabolism
	pyridoxal kinase (Pyridoxamine)	ATP[c] + Pyridoxamine[c] => ADP[c] + H+[c] + Pyridoxamine 5'-phosphate[c]	2.7.1.35	AC5u0009GL000270 or AC5u0009GL000843 or AC5u0009GL001072	Vitamin B6 metabolism
	L-leucine transport in via proton symport	H+[e] + L-Leucine[e] => H+[c] + L-Leucine[c]		AC5u0009GL001196 or AC5u0009GL002064
	D-glucose transport in via proton symport	D-Glucose[e] + H+[e] => D-Glucose[c] + H+[c]		AC5u0009GL000984 or AC5u0009GL000151 or AC5u0009GL001518
	ornithine transport in via proton symport	H+[e] + L-Ornithine[e] => H+[c] + L-Ornithine[c]		AC5u0009GL000124
	Arginine/ornithine antiporter	L-Arginine[e] + L-Ornithine[c] <=> L-Arginine[c] + L-Ornithine[e]		AC5u0009GL000124 or AC5u0009GL001437 or AC5u0009GL001438 or AC5u0009GL000125 or AC5u0009GL001158 or AC5u0009GL001484
	CPS synthase complex, LRE specific	4 H2O[c] + 4 UDPglucose[c] <=> capsular polysaccharide linkage unit, LRE specific[c] + 5 H+[c] + 3 UDP[c] + UMP[c]	3.1.3.48	AC5u0009GL001937 or AC5u0009GL001426 or AC5u0009GL001454 or AC5u0009GL001791 or AC5u0009GL001282 or AC5u0009GL001425 or AC5u0009GL001152
	L-glutamate transport in/out via proton symporter	L-Glutamate[e] + H+[e] <=> L-Glutamate[c] + H+[c]		AC5u0009GL002024
	L-isoeucine transport in/out via proton symport	H+[e] + L-Isoleucine[e] <=> H+[c] + L-Isoleucine[c]		AC5u0009GL001196 or AC5u0009GL002064 or AC5u0009GL001499 or AC5u0009GL001500
	uracil transport in via proton symport	H+[e] + Uracil[e] => H+[c] + Uracil[c]		AC5u0009GL000111
	L-lysine transport in/out via proton symport	H+[e] + L-Lysine[e] <=> H+[c] + L-Lysine[c]		AC5u0009GL001222
	L-valine transport in/out via proton symport	H+[e] + L-Valine[e] <=> H+[c] + L-Valine[c]		AC5u0009GL001196 or AC5u0009GL002064 or AC5u0009GL001499 or AC5u0009GL001500
	L-tyrosine transport in/out via proton symport	H+[e] + L-Tyrosine[e] <=> H+[c] + L-Tyrosine[c]		AC5u0009GL000940 or AC5u0009GL001485
	L-histidine transport via ABC system	ATP[c] + H2O[c] + L-Histidine[e] => ADP[c] + H+[c] + L-Histidine[c] + Phosphate[c]		AC5u0009GL000164 or AC5u0009GL000669 or AC5u0009GL002127 or AC5u0009GL000165 or AC5u0009GL000613 or AC5u0009GL000668 or AC5u0009GL000728 or AC5u0009GL001233 or AC5u0009GL001666 or AC5u0009GL001685 or AC5u0009GL002128 or AC5u0009GL000667 or AC5u0009GL000800 or AC5u0009GL002129
	L-threonine transport out via proton antiport	H+[e] + L-Threonine[c] => H+[c] + L-Threonine[e]		AC5u0009GL001226 or AC5u0009GL001105 or AC5u0009GL001225
	L-arginine transport via ABC system	L-Arginine[e] + ATP[c] + H2O[c] => ADP[c] + L-Arginine[c] + H+[c] + Phosphate[c]	3.6.3.21	AC5u0009GL000164 or AC5u0009GL000669 or AC5u0009GL001684 or AC5u0009GL002127 or AC5u0009GL000165 or AC5u0009GL000668 or AC5u0009GL000728 or AC5u0009GL001233 or AC5u0009GL001666 or AC5u0009GL001685 or AC5u0009GL001849 or AC5u0009GL002128
	L-cysteine transport via ABC system	ATP[c] + L-Cysteine[e] + H2O[c] => ADP[c] + L-Cysteine[c] + H+[c] + Phosphate[c]	3.6.3.21	AC5u0009GL000165 or AC5u0009GL000668 or AC5u0009GL000728 or AC5u0009GL001233 or AC5u0009GL001666 or AC5u0009GL001685 or (AC5u0009GL002128 or AC5u0009GL000729 or AC5u0009GL000727)
	L-arginine transport in via proton symport	L-Arginine[e] + H+[e] => L-Arginine[c] + H+[c]		AC5u0009GL000124
	L-isoleucine transport in via proton symport	H+[e] + L-Isoleucine[e] => H+[c] + L-Isoleucine[c]		AC5u0009GL001196 or AC5u0009GL002064
	L-serine transport out via proton antiport	H+[e] + L-Serine[c] => H+[c] + L-Serine[e]		AC5u0009GL001226 or AC5u0009GL001105 or AC5u0009GL001225
	deoxyribose transport in via proton symporter	Deoxyribose[e] + H+[e] => Deoxyribose[c] + H+[c]		AC5u0009GL000984
	Hydroxymethylpyrimidine ABC transporter	4-Amino-5-hydroxymethyl-2-methylpyrimidine[e] + ATP[c] + H2O[c] => 4-Amino-5-hydroxymethyl-2-methylpyrimidine[c] + ADP[c] + H+[c] + Phosphate[c]		AC5u0009GL001218 or AC5u0009GL001217
	Dihydroxyacetone transport via facilitated diffusion	Dihydroxyacetone[e] <=> Dihydroxyacetone[c]		AC5u0009GL001930
	D-gluconate transport via proton symport, reversible	D-Gluconate[e] + H+[e] <=> D-Gluconate[c] + H+[c]		AC5u0009GL001541 or AC5u0009GL001364
	xanthine transport in via proton symport	H+[e] + Xanthine[e] => H+[c] + Xanthine[c]		AC5u0009GL001486
	manganese transport via ABC system	ATP[c] + H2O[c] + Mn2+[e] => ADP[c] + H+[c] + Mn2+[c] + Phosphate[c]	3.6.3.35	AC5u0009GL000586 or AC5u0009GL000588 or AC5u0009GL000587
	putrescine transport via ABC system	ATP[c] + H2O[c] + Putrescine[e] => ADP[c] + H+[c] + Phosphate[c] + Putrescine[c]	3.6.3.31	AC5u0009GL002082 or AC5u0009GL002080 or AC5u0009GL002081 or AC5u0009GL000915 or AC5u0009GL002083
	potassium transport via ABC system	ATP[c] + H2O[c] + K+[e] => ADP[c] + H+[c] + K+[c] + Phosphate[c]		AC5u0009GL001305 or AC5u0009GL001304
	manganese transport in/out via proton symport	H+[e] + Mn2+[e] <=> H+[c] + Mn2+[c]		AC5u0009GL001302 or AC5u0009GL001853
	sodium transport in/out via proton antiport (one H+)	H+[e] + Sodium[c] <=> H+[c] + Sodium[e]		AC5u0009GL001214 or AC5u0009GL000605
	choline transport via ABC system	ATP[c] + Choline[e] + H2O[c] => ADP[c] + Choline[c] + H+[c] + Phosphate[c]		AC5u0009GL000914 or AC5u0009GL000916 or AC5u0009GL000915 or AC5u0009GL002083
	magnesium transport in/out via permease (no H+)	Mg[c] <=> Mg[e]		AC5u0009GL001488
	choline transport in/out via proton symport	Choline[e] + H+[e] <=> Choline[c] + H+[c]		AC5u0009GL000918
	L-fucose transport via proton symport	L-Fucose[e] + H+[e] <=> L-Fucose[c] + H+[c]		AC5u0009GL000984
	lactose transport in/out via proton symport	H+[e] + Lactose[e] <=> H+[c] + Lactose[c]		AC5u0009GL002019
	D-cysteine transport via ABC system	ATP[c] + D-Cysteine[e] + H2O[c] => ADP[c] + D-Cysteine[c] + H+[c] + Phosphate[c]		AC5u0009GL000165 or AC5u0009GL000668 or AC5u0009GL000728 or AC5u0009GL001233 or AC5u0009GL001666 or AC5u0009GL001685 or (AC5u0009GL002128 or AC5u0009GL000729 or AC5u0009GL000727)
	Sucrose transport via permease	Sucrose[e] <=> Sucrose[c]		AC5u0009GL001435
	Sulfate transporter via ABC	ATP[c] + H2O[c] + Sulfate[e] => ADP[c] + H+[c] + Phosphate[c] + Sulfate[c]		AC5u0009GL000834 or AC5u0009GL001081
	Ribose transport via ABC system	ATP[c] + H2O[c] + D-Ribose[e] => ADP[c] + H+[c] + Phosphate[c] + D-Ribose[c]	3.6.3.17	AC5u0009GL001971
	galactose transport in/out via proton symport	H+[e] + D-Galactose[e] <=> D-Galactose[c] + H+[c]		AC5u0009GL002019
	maltose transport in/out via proton symport	H+[e] + Maltose C12H22O11[e] <=> H+[c] + Maltose[c]		AC5u0009GL000409 or AC5u0009GL001181 or AC5u0009GL001184 or AC5u0009GL002112
	trehalose transport in/out via proton symport	H+[e] + Trehalose[e] <=> H+[c] + Trehalose[c]		AC5u0009GL000409 or AC5u0009GL001181 or AC5u0009GL001184 or AC5u0009GL002112
	Mannitol efflux via ABC system	ATP[c] + H2O[c] + D-Mannitol[c] => ADP[c] + H+[c] + D-Mannitol[e] + Phosphate[c]		AC5u0009GL001848 or AC5u0009GL000165 or AC5u0009GL000668 or AC5u0009GL001849 or AC5u0009GL002128
	glycerol transport in/out via diffusion reversible	Glycerol[c] <=> Glycerol[e]		AC5u0009GL001930
	cobalt transport in/out via permease (no H+)	Co2+[c] <=> Co2+[e]		AC5u0009GL001488
	L-leucine transport in/out via proton symport	H+[e] + L-Leucine[e] <=> H+[c] + L-Leucine[c]		AC5u0009GL001196 or AC5u0009GL002064 or AC5u0009GL001499 or AC5u0009GL001500

## Sheet: Table S9
	Table S9 List of reporter metabolites when alteration of carbon sources at L-phase of growth.
	Reporter metabolite	Distinct up-directional p-value
	L-Glutamate	0.001996
	L-Glutamine	0.001996
	Bicarbonate	0.003992
	L-Cysteine	0.003992
	L-Histidine	0.003992
	D-Mannitol	0.003992
	D-Fructose	0.003992
	N(omega)-(L-Arginino)succinate	0.003992
	Phosphate	0.005988
	L-Aspartate	0.005988
	L-Arginine	0.005988
	D-Cysteine	0.007984
	2-Oxoglutarate	0.015968
	L-Phenylalanine	0.01996
	Phenylpyruvate	0.01996
	L-Tyrosine	0.01996
	3-(4-Hydroxyphenyl)pyruvate	0.01996
	Sucrose	0.01996
	N-Carbamoyl-L-aspartate	0.01996
	Diphosphate	0.021956
	Carbamoylphosphate	0.021956
	(S)-Dihydroorotate	0.023952
	2ADP	0.027944
	2ATP	0.027944
	Orotidine 5'-phosphate	0.027944
	ATP	0.02994
	Orotate	0.02994
	4-Aminobutanoate	0.031936

## Sheet: Table S10
	Table S10 List of reporter metabolites when alteration of carbon sources at S-phase of growth.
	Reporter metabolite	Distinct up-directional p-value
	L-Glutamine	0.003992
	Sucrose	0.003992
	D-Fructose	0.003992
	L-Glutamate	0.005988
	Orotidine 5'-phosphate	0.005988
	(S)-Dihydroorotate	0.007984
	N-Carbamoyl-L-aspartate	0.007984
	Orotate	0.007984
	5-Phospho-alpha-D-ribose1-diphosphate	0.00998
	Phosphate	0.011976
	2ADP	0.013972
	Bicarbonate	0.013972
	2ATP	0.013972
	Diphosphate	0.015968
	Levan	0.027944
	D-Glucose1-phosphate	0.03992
	Carbamoylphosphate	0.03992
	D-Ribulose5-phosphate	0.045908
	Formate	0.045908
	2,5-Diamino-6-hydroxy-4-(5'-phosphoribosylamino)-pyrimidine	0.045908
	3,4-dihydroxy-2-butanone4-phosphate	0.045908

[truncated: 2 more sheets: Table S11, Table S12]
